# The evolutionary plasticity of chromosome metabolism allows adaptation to DNA replication stress

Marco Fumasoni\* and Andrew W. Murray

Department of Molecular and Cellular Biology, Harvard University, Cambridge, United States

## Abstract

Chromosome metabolism is defined by the pathways that collectively maintain the genome, including chromosome replication, repair and segregation. Because aspects of these pathways are conserved, chromosome metabolism is considered resistant to evolutionary change. We used the budding yeast, *Saccharomyces cerevisiae*, to investigate the evolutionary plasticity of chromosome metabolism. We experimentally evolved cells constitutively experiencing DNA replication stress caused by the absence of Ctf4, a protein that coordinates the activities at replication forks. Parallel populations adapted to replication stress, over 1000 generations, by acquiring multiple, successive mutations. Whole-genome sequencing and testing candidate mutations revealed adaptive changes in three aspects of chromosome metabolism: DNA replication, DNA damage checkpoint and sister chromatid cohesion. Although no gene was mutated in every population, the same pathways were sequentially altered, defining a functionally reproducible evolutionary trajectory. We propose that this evolutionary plasticity of chromosome metabolism has important implications for genome evolution in natural populations and cancer.

\* For correspondence: [marcofumasoni@fas.harvard.edu](mailto:marcofumasoni@fas.harvard.edu)

## 27 **Introduction**

28 The central features of many fundamental biological processes, such as the mechanism  
29 of DNA, RNA and protein synthesis, have been conserved since the last common  
30 ancestor of all extant organisms. Many of the proteins involved in these processes are  
31 essential, and the complex molecular interactions between them have been argued to  
32 constrain the evolution of both the processes and the proteins that carry them out (Wilson,  
33 Carlson, and White 1977; Fraser et al. 2002).

34 DNA replication is one of the most conserved cellular processes. Replication requires  
35 multiple enzymes that catalyze individual reactions such as unwinding the double helix,  
36 priming replication, and synthesizing new DNA strands (O'Donnell, Langston, and  
37 Stillman 2013). A common feature of replication is the organization of these enzymatic  
38 activities in multi-molecular complexes called replisomes, whose function is to coordinate  
39 the simultaneous synthesis of DNA from the two anti-parallel template strands (Yao and  
40 O'Donnell 2016). Replisomes need to be tightly regulated to integrate replication with  
41 other essential aspects of chromosome metabolism such as DNA repair and chromosome  
42 segregation (Branzei and Foiani 2010; Bell and Labib 2016). This regulation is critical in  
43 eukaryotes, where the presence of multiple replication origins requires the coordination  
44 of several replisomes simultaneously travelling along the same DNA molecule (Dewar  
45 and Walter 2017; Siddiqui, On, and Diffley 2013).

46 The temporal and physical interactions between the enzymatic machinery that performs  
47 the different steps of DNA replication are remarkably conserved. Nevertheless,  
48 differences in many features of DNA replication have been reported: the number of  
49 replisome subunits is higher in eukaryotes than in bacteria, possibly to account for the  
50 higher complexity of eukaryotic genomes (McGeoch and Bell 2008). Some subunits are  
51 only found in some eukaryotic species (Y. Liu, Richards, and Aves 2009; Aves, Liu, and  
52 Richards 2012). Notably, there are also biochemical variations in important features, such  
53 as the helicase, which encircles the leading strand in eukaryotes and the lagging strand  
54 in prokaryotes (McGeoch and Bell 2008), or differences in the regulation of DNA  
55 replication by the machinery that drives the cell cycle progression (Cross, Buchler, and  
56 Skotheim 2011; Siddiqui, On, and Diffley 2013; Parker, Botchan, and Berger 2017).

57 These differences reveal that although the DNA replication module performs  
58 biochemically conserved reactions, its features can change during evolution. This  
59 observation poses an apparent paradox: how can such an important process change  
60 during evolution without killing cells? One hypothesis is that because so many replication  
61 proteins are essential, the observed differences can only be obtained by extremely slow  
62 evolutionary processes that require many successive mutations of small effect and  
63 happen over millions of generations. Alternatively, the DNA replication module could  
64 accommodate substantial changes within hundreds or thousands of generations, but such  
65 events would have to be rare to explain the overall conservation of DNA replication.

66 To distinguish between these two hypotheses, we followed the evolutionary response to  
67 a genetic perturbation of DNA replication. Characterizing evolutionary responses to  
68 genetic perturbations has informed studies of functional modules (Rojas Echenique et al.  
69 2019; Filteau et al. 2015; Harcombe, Springman, and Bull 2009), challenged the notion  
70 that particular genes are essential (Rancati et al. 2018; G. Liu et al. 2015), and revealed  
71 that initial genotypes can determine evolutionary trajectories (Szamecz et al. 2014; Rojas  
72 Echenique et al. 2019; Lind, Farr, and Rainey 2015).

73 We followed the evolutionary response of *S. cerevisiae* to DNA replication stress, an  
74 overall perturbation of DNA replication that interferes with chromosome metabolism,  
75 reduces cell viability, and induces genetic instability (Zeman and Cimprich 2014; Muñoz  
76 and Méndez 2016). DNA replication stress has been implicated in both cancer  
77 progression and aging (Burhans and Weinberger 2007; Gaillard, García-Muse, and  
78 Aguilera 2015) but despite studies investigating the direct effect of replication stress on  
79 cell physiology, its evolutionary consequences are unknown. We induced replication  
80 stress by removing an important but non-essential component of the DNA replication  
81 module, Ctf4, which coordinates activities at the replisome (Villa et al. 2016). We then  
82 evolved eight *ctf4*Δ populations for 1000 generations, exploiting the ability of experimental  
83 evolution (Barrick and Lenski 2013) to identify, analyze, and compare the mutations that  
84 create parallel evolutionary trajectories to increase fitness (Laan, Koschwanez, and  
85 Murray 2015; Koschwanez, Foster, and Murray 2013; Wildenberg and Murray 2014).

86 We found that populations recover from the fitness defect induced by DNA replication  
87 stress. Genetic analysis revealed that their adaptation is driven by mutations that change  
88 conserved features in three modules involved in chromosome metabolism: DNA  
89 replication, the DNA damage checkpoint, and sister chromatid cohesion. These mutations  
90 arise sequentially and collectively allow cells to approach the fitness of their wild-type  
91 ancestors within 1000 generations of evolution. The molecular basis of these adaptive  
92 strategies and their epistatic interactions produce a mechanistic model of the evolutionary  
93 adaptation to replication stress. Our results reveal the short-term evolutionary plasticity  
94 of chromosome metabolism. We discuss the consequences of this plasticity for the  
95 evolution of species in the wild and cancer progression.

## 96 **Results**

### 97 **Adaptation to DNA replication stress is driven by mutations in chromosome** 98 **metabolism**

99 Replication stress refers to the combination of the defects in DNA metabolism and the  
100 cellular response to these defects in cells whose replication has been substantially  
101 perturbed (Macheret and Halazonetis 2015). Problems in replication can arise at the sites  
102 of naturally occurring or experimentally induced lesions and can cause genetic instability  
103 (Muñoz and Méndez 2016). We asked how cells evolve to adapt to constitutive DNA  
104 replication stress.

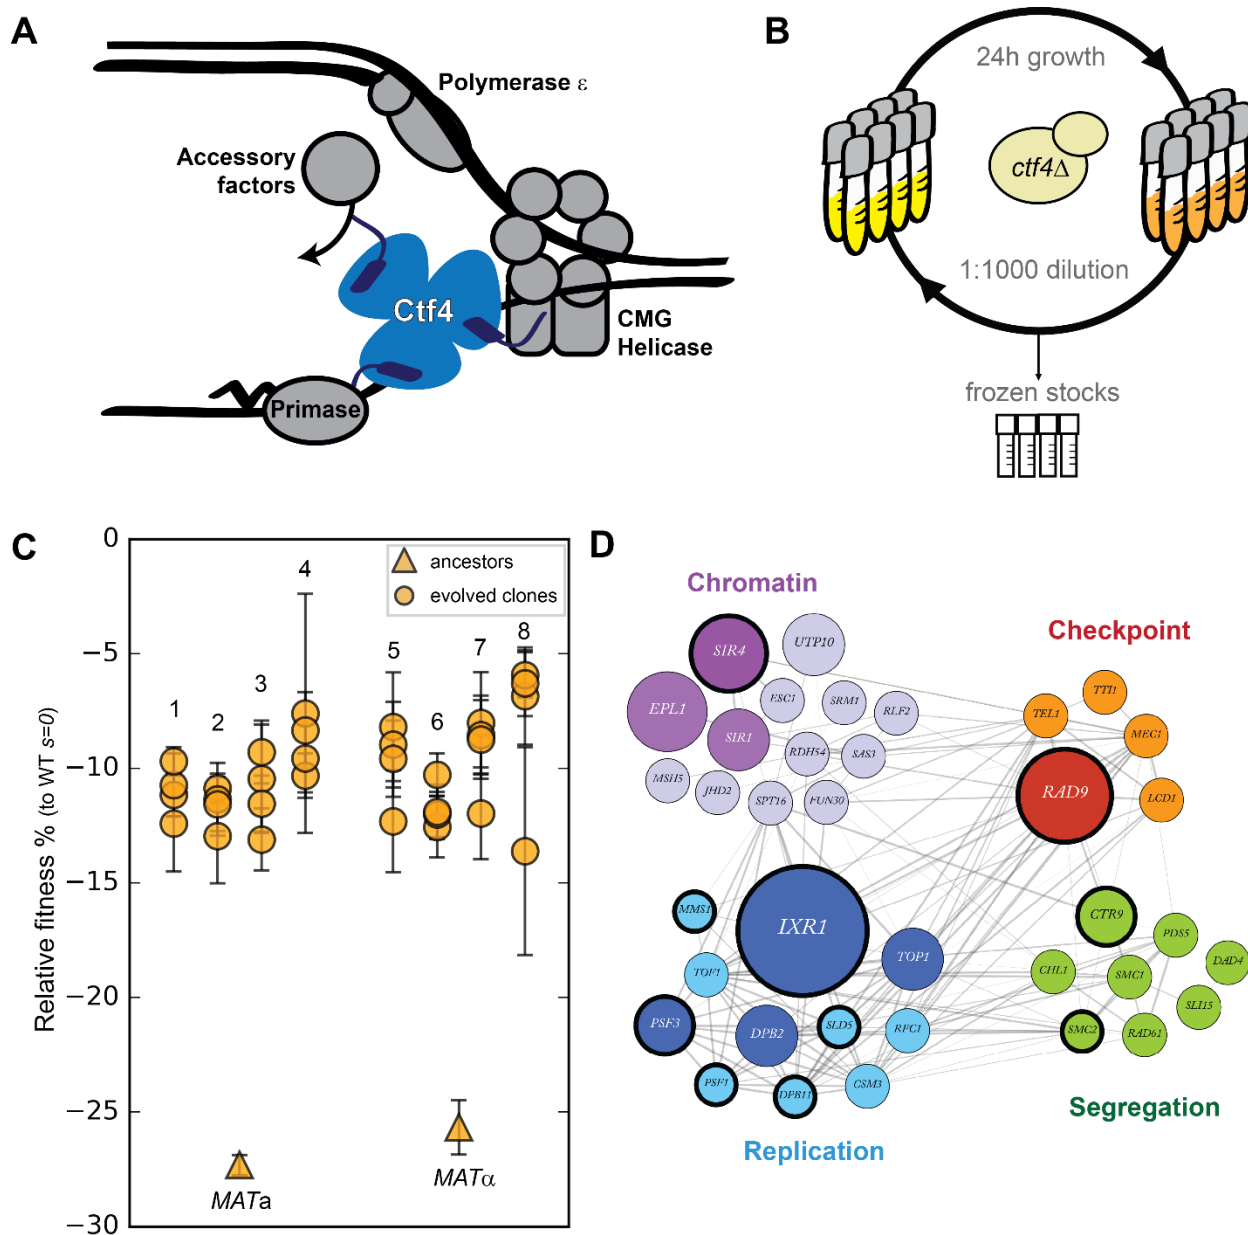

105

106 **Figure 1. Fast evolutionary adaptation to DNA replication stress.** (A) Schematic representation of the  
 107 replisome focused on the role of Ctf4 in coordinating the replicative helicase, primase, and other factors.  
 108 (B) The experimental evolution scheme: independent colonies of *ctf4Δ S. cerevisiae* were inoculated in rich  
 109 media, grown to saturation, and diluted 1:1000 in fresh media for a total of 100 cycles (1000 generations).  
 110 Populations samples were saved every 50 generations for future analysis. (C) Fitness of the *ctf4Δ* ancestor  
 111 strains and of 32 evolved clones isolated from the 8 (labeled 1 through 8) populations derived from them,  
 112 relative to wt cells ( $s=0$ ). Error bars represent standard deviations. *MATa* and *MATα* refer to the strain sex.  
 113 (D) Simplified representation of the modules enriched in putative adaptive mutations, found in evolved  
 114 clones. Grey lines represent evidence of genetic and physical interactions from the literature ([https://string-  
 115 db.org](https://string-db.org)). Node diameter is proportional to the number of populations in which the gene was mutated.  
 116 Selection on darker nodes was statistically significant. Nodes surrounded with a bold circle are genes in  
 117 which mutations were found to strongly correlate with the evolved phenotype by bulk segregant analysis.

118 Previous work has induced replication stress by using chemical treatments or genetic  
119 perturbations affecting factors involved in DNA replication (Zheng et al. 2016; Tkach et  
120 al. 2012; Mazouzi et al. 2016). To avoid evolving resistance to drugs or the reversion of  
121 point mutations that induce replication stress, we chose instead to remove *CTF4*, a gene  
122 encoding an important, but non-essential, component of the DNA replication machinery.  
123 Ctf4 is a homo-trimer, that serves as a structural hub within the replisome and coordinates  
124 different aspects of DNA replication by binding the replicative helicase, the primase, and  
125 other factors recruited to the replication fork (Figure 1A, Gambus et al., 2009; Samora et  
126 al., 2016; Simon et al., 2014; Tanaka et al., 2009; Villa et al., 2016). In the absence of  
127 Ctf4, cells experience several problems in fork progression leading to the accumulation  
128 of defects commonly associated with DNA replication stress (Muñoz and Méndez 2016),  
129 such as single-stranded DNA gaps and altered replication forks (Fumasoni et al. 2015;  
130 Abe et al. 2018; Kouprina et al. 1992).

131 We generated *ctf4Δ* and wild type (WT) ancestor strains by sporulating a heterozygous  
132 *CTF4/ctf4Δ* diploid. As previously reported (Miles and Formosa 1992; Kouprina et al.  
133 1992), *ctf4Δ* cells display severe growth defects, which we quantified as a fitness  
134 decrease of approximately 25% relative to WT (Figure 1C). We then evolved eight parallel  
135 populations of each genotype for 1000 generations by serial dilutions in rich media,  
136 freezing population samples every 50 generations (Figure 1B). Under this regime,  
137 spontaneous mutations that increase cellular fitness and survive genetic drift will be  
138 selected and spread asexually within the populations (Jerison and Desai 2015;  
139 Venkataram et al. 2016; Levy et al. 2015). At the end of the experiment, we asked whether  
140 cells had recovered from the fitness decrease induced by replication stress by measuring  
141 the fitness of the evolved *ctf4Δ* and WT populations. Expressing the results as a  
142 percentage of the fitness of the WT ancestor, the evolved WT populations increased their  
143 fitness by an average of  $4.0 \pm 0.3\%$  (Figure S1A), a level similar to previous experiments  
144 (Lang et al. 2013; Buskirk, Peace, and Lang 2017). In contrast, we found that the fitness  
145 of the evolved *ctf4Δ* populations rose by  $17 \pm 0.2\%$  (Figure S1A). Clones isolated from  
146 these populations showed similar fitness increases (Figure 1C).

147 To understand this evolutionarily rapid adaptation to constitutive replication stress, we  
148 whole-genome sequenced all the final evolved populations as well as 32 individual clones  
149 (4 from each of the evolved populations) isolated from the *ctf4Δ* lineages. During  
150 experimental evolution, asexual populations accumulate two types of mutations: adaptive  
151 mutations that increase their fitness and neutral or possibly mildly deleterious mutations  
152 that hitchhike with the adaptive mutations (Table S1). To distinguish between these  
153 mutations, we used a combination of statistical and experimental approaches. First, we  
154 inferred that mutations in a gene were adaptive if the gene was mutated more frequently  
155 than expected by chance across our parallel and independent populations (Table S2).  
156 Second, we performed bulk segregant analysis on selected evolved clones. This  
157 technique takes advantage of sexual reproduction, followed by selection, to separate  
158 causal and hitchhiking mutations. In this case, mutations that segregate strongly with the  
159 evolved phenotype are assumed to be adaptive (Figure S1B). We combined these two



160 lists of mutated genes and looked for enriched gene ontology (GO) terms. This analysis  
161 revealed an enrichment of genes implicated in several aspect of chromosome metabolism  
162 (Table S3). Among the genes associated with these terms, many are involved in four  
163 functional modules: DNA replication, chromosome segregation (including genes involved  
164 in sister chromatid linkage and spindle function), cell cycle checkpoint and chromatin  
165 remodeling (Figure S1C). The genes in these modules that were mutated in the evolved  
166 clones are shown, grouped by function, in Figure 1D.

### 167 **Loss of the DNA damage checkpoint shortens G2/M**

168 We found several mutations affecting genes involved in cell-cycle checkpoints (Figure  
169 2B). Checkpoints are feedback control mechanisms that induce cell-cycle delays in  
170 response to defects that reflect the failure to complete important process and thus  
171 guarantee the proper sequence of events required for cell division (Elledge 1996; Murray  
172 1992). Three such delays have been characterized. In yeast, the first prevent cells from  
173 entering S-phase in response to DNA damage occurring in G1. A second slow progress  
174 through S-phase in response to problems encountered during DNA synthesis. The third  
175 can instead delay sister chromatid separation (anaphase) and the exit from mitosis in  
176 response to DNA damage incurred after cells enter S-phase or defects in chromosome  
177 attachment to the mitotic spindle (Figure 2A, Murray, 1994).

178 The genes listed in Figure 2B are implicated at different levels in either the replication or  
179 mitotic delays (Figure S2B, Pasero and Vindigni, 2017). The most frequently mutated  
180 gene, *RAD9*, encodes an important component of the DNA damage checkpoint, which is  
181 required to slow DNA synthesis and delay anaphase in response to DNA lesions (Weinert  
182 and Hartwell 1988). Four out of the five mutations in *RAD9* produced early stop codons,  
183 or radical amino acid substitutions in the BRCT domain, which is essential for Rad9's  
184 function (Figure 2C, S2A, Soulier and Lowndes, 1999), arguing that inactivation of Rad9  
185 was repeatedly and independently selected for during evolution. To test this hypothesis,  
186 we engineered the most frequently occurring mutation (2628 +A, a frameshift mutation  
187 leading to a premature stop codon K883\*) into the ancestral *ctf4Δ* strain (*ctf4Δ* anc). We  
188 suspect that the high frequency of this mutation is due to the presence of a run of 11 As,  
189 a sequence that is known to be susceptible to loss or gain of a base during DNA  
190 replication. This mutation (Figure 2C, S2A) produced a fitness increase very similar to the  
191 one caused by deleting the entire gene (Figure 2D). We conclude that inactivation of Rad9  
192 is adaptive in the absence of Ctf4.

193 We asked if the removal of Rad9 eliminated a cell cycle delay caused by the absence of  
194 Ctf4. In the *ctf4Δ* ancestor, *rad9Δ* does, indeed, decrease the fraction of cells with a 2C  
195 DNA content (the DNA content in G2 and mitosis) observed in asynchronously growing  
196 *ctf4Δ* cells (Tanaka et al., 2009). This observation suggests that the interval between the  
197 end of DNA replication and cell division decreases in *ctf4Δ rad9Δ* cells. The spindle  
198 checkpoint, which blocks anaphase in response to defects in mitotic spindle assembly,  
199 can also delay chromosome segregation in cells (Li and Murray 1991). But although  
200 deleting *MAD2*, a key spindle checkpoint component, also decreases the interval between

201 replication and division in *ctf4Δ* cells (Hanna et al. 2001), it reduces rather than increases  
 202 the fitness of the *ctf4Δ* ancestor (Figure 2D). These results suggest that ignoring some  
 203 defects in *ctf4Δ* cells, such as those that activate the DNA damage checkpoint, improves  
 204 fitness, whereas ignoring others, such as defects in chromosome alignment on the  
 205 spindle, reduces fitness.

206

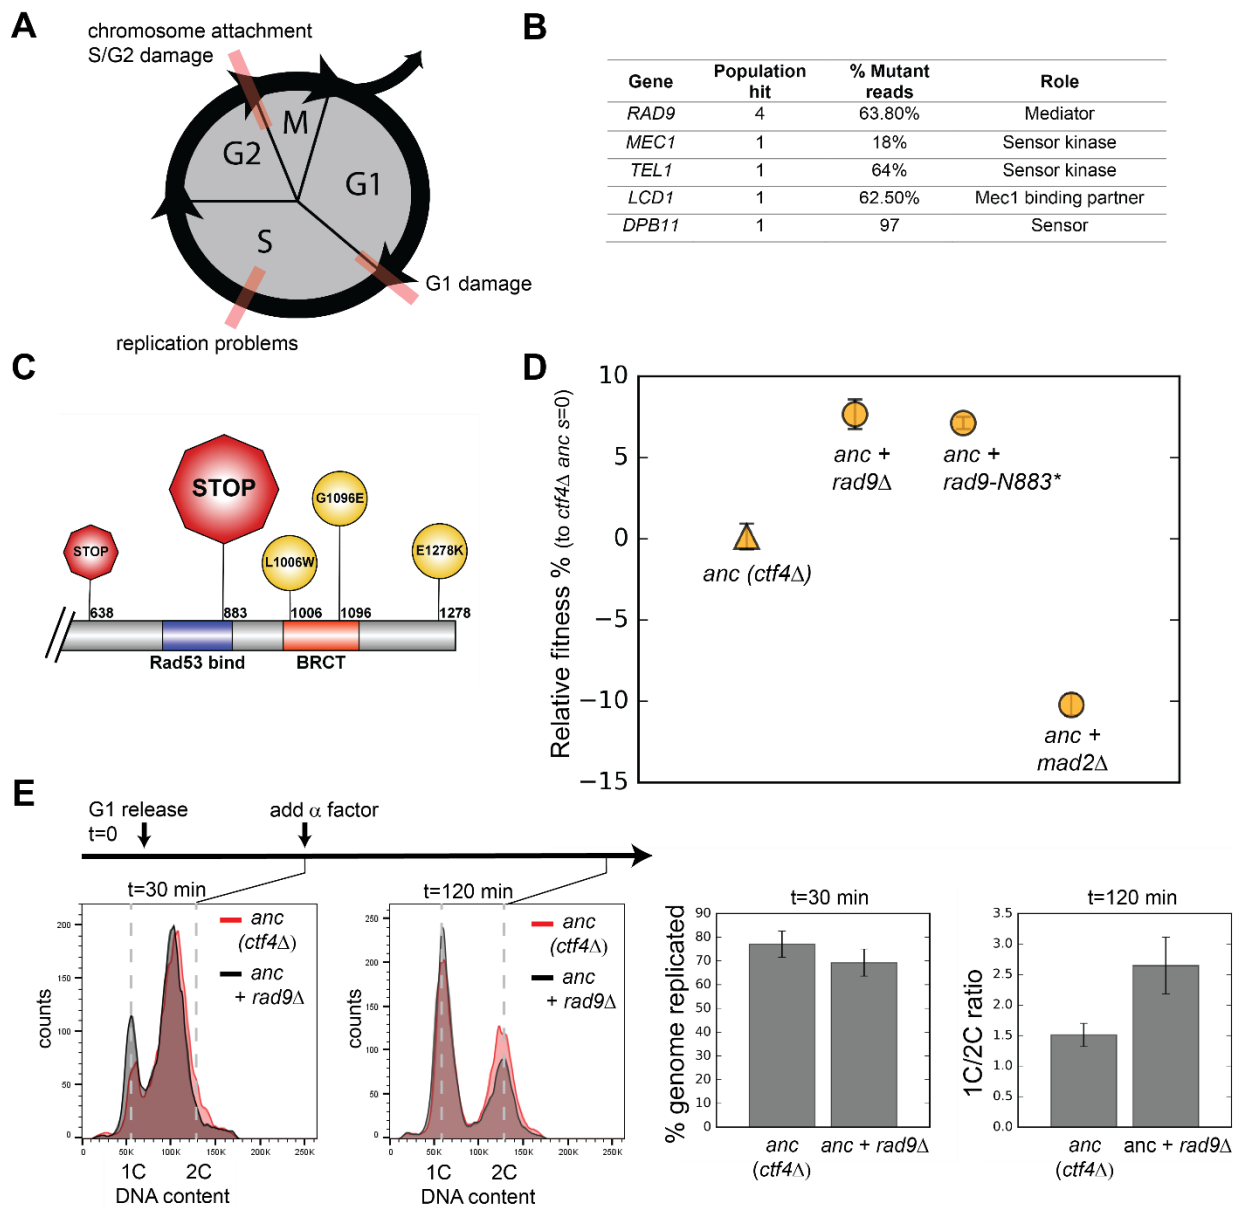

207

208 **Figure 2. Checkpoint mutations cause a faster G2/M transition in evolved cells** (A) Schematic  
 209 representation of cell cycle progression. The transitions delayed by various checkpoints are highlighted in  
 210 red. (B) List of checkpoint genes mutated in evolved clones and their role in the signaling cascade.  
 211 'Populations hit' refers to the number of populations where the gene was mutated. '% Mutant reads' was  
 212 calculated as the average of the mutant read frequencies in the different populations where the mutation  
 213 was detected. (C) Schematic of the C-terminal region of Rad9 that was affected by mutations in evolved  
 214 clones. The diameter of the symbol is proportional to the number of populations where the mutation was

215 detected. Note that both stop codons resulted from an upstream frameshift. Two populations contained  
216 more than one distinct *RAD9* mutations. **(D)** The fitness of *ctf4Δ* strains carrying two reconstructed  
217 mutations in the DNA damage checkpoint (*rad9Δ* and *rad9K883\**) and an engineered inactivation of the  
218 spindle checkpoint (*mad2Δ*) relative to the *ctf4Δ* ancestors (*ctf4Δ anc*, *s=0*). Error bars represent standard  
219 deviations. **(E)** Cell cycle profiles of *ctf4Δ* ancestor and *ctf4Δ rad9Δ* cells at two time points during a  
220 synchronous cell cycle. Cells were arrested in G1 and subsequently released synchronously into S-phase.  
221 Time points taken at 30 min and 120 min after the release are shown.  $\alpha$ -factor was added 30 min after  
222 release to prevent cells entering a second cell cycle and thus ensure that 2C cells at the 120 min  
223 measurement resulted from a G2 delay rather than progress through a second cell cycle. The percentage  
224 of genome replicated at 30 min was calculated based on the cell cycle profile. 1C/2C ratios were calculated  
225 based on the height of the respective 1C and 2C peaks at 120 min.

226 Problems encountered during DNA synthesis also activate the replication checkpoint,  
227 which inhibits DNA replication to prevent further lesions (Zegerman and Diffley 2009,  
228 2010). As many proteins involved in the DNA damage checkpoint are shared with the  
229 replication checkpoint (Figure S2B, Pardo et al., 2017), we followed a single synchronous  
230 cell-cycle to ask whether the fitness benefits conferred by *RAD9* deletion were due to a  
231 faster progression through S-phase or faster progress through mitosis. Loss of Rad9 in  
232 *ctf4Δ* cells did not accelerate S-phase, but it did lead to faster passage through mitosis  
233 as revealed by a reduced fraction of 2C cells (Figure 2E).

234 To separate the role of the replication and DNA damage checkpoints, we genetically  
235 manipulated targets of the checkpoints whose phosphorylation delays either anaphase  
236 (*Pds1*, Wang et al., 2001) or the completion of replication (*Sld3* and *Dbf4*, Zegerman &  
237 Diffley, 2010, Figure S2B). Fitness measurement in these mutants (*pds1-m9* or the  
238 double mutant *sld3-A/dbf4-4A*) showed that while decreasing the mitotic delay in  
239 ancestral *ctf4Δ* cells was beneficial, a faster S-phase was highly detrimental (Figure S2C).  
240 Collectively, these results show that the specific absence of a DNA damage-induced  
241 delay of anaphase, rather than generic cell-cycle acceleration, is adaptive in *ctf4Δ* cells  
242 experiencing replication stress.

### 243 **Amplification of cohesin loader genes improves sister chromatid cohesion**

244 We examined the evolved clones for changes in the copy number across the genome  
245 (DNA copy number variations, CNVs). Several clones showed segmental amplifications,  
246 defined as an increase in the copy number of a defined chromosomal segment (Figure  
247 S3A). The most common (17 out of 32 sequenced clones) was the amplification of a 50-  
248 100 kb region of chromosome IV (chrIV). In addition to this segmental amplification on  
249 chromosome IV, evolved clone EVO2-10 also carried an extra copy of a portion of  
250 chromosome V (chrV, Figure 3A). Amongst the genes affected by these two CNVs are  
251 *SCC2* and *SCC4* on the amplified portions of chromosomes IV and V respectively. These  
252 two genes encode the two subunits of the cohesin loader complex, which loads cohesin  
253 rings on chromosomes to ensure sister chromatid cohesion until anaphase (Figure S3C,  
254 Ciosk et al., 2000; Michaelis et al., 1997). The amplification of *SCC2* and *SCC4*, together  
255 with the other genes altered by point mutations in our evolved clones (Figure 3B), strongly  
256 suggest that the absence of *Ctf4* selects for mutations that affect the linkage between  
257 sister chromatids.



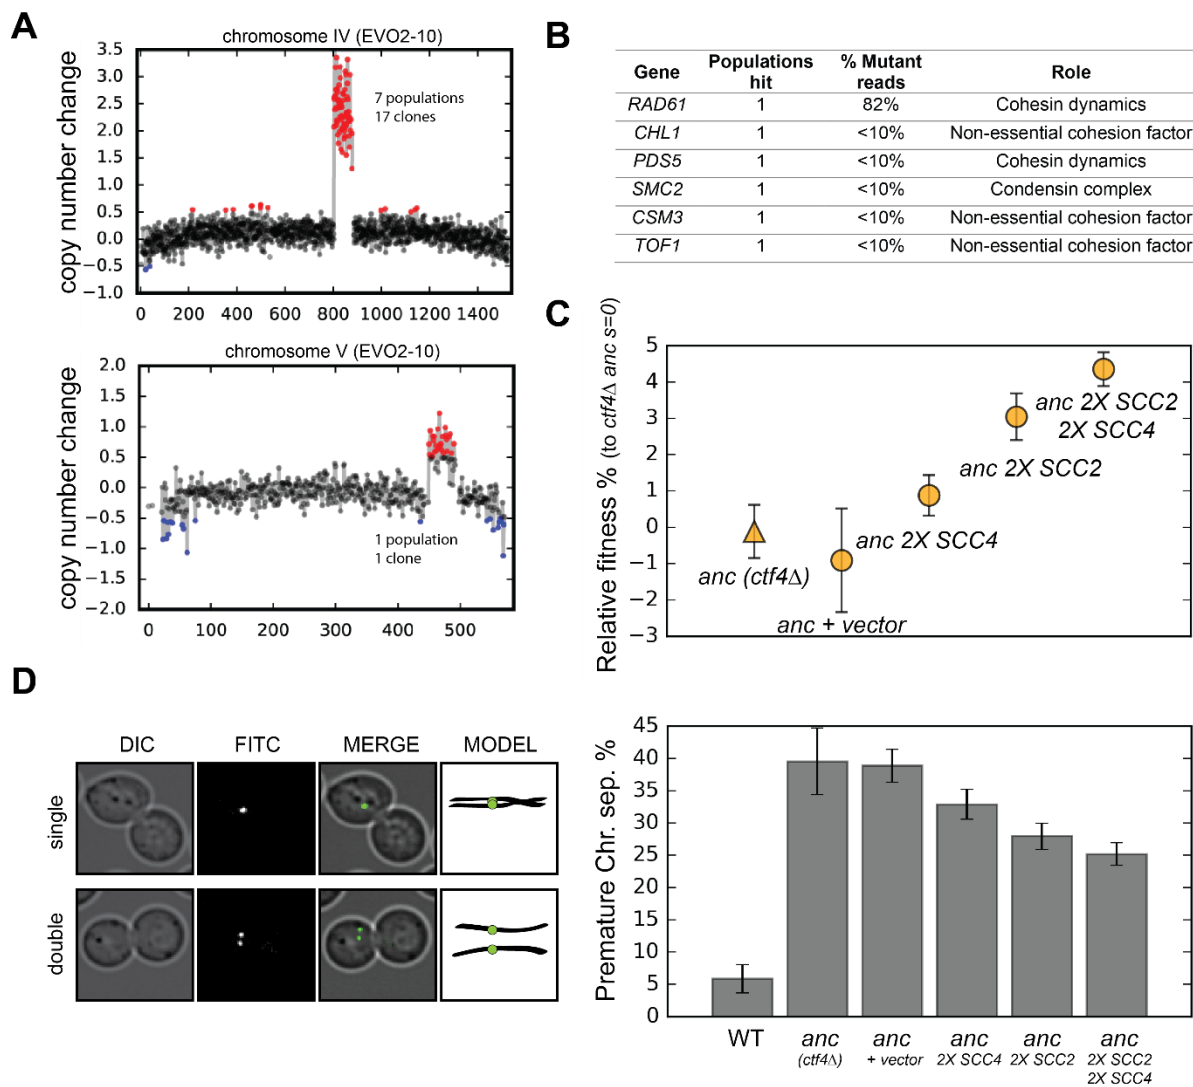

258

259 **Figure 3. Amplification of cohesin loader genes.** (A) Copy number variations (CNVs) affecting  
 260 chromosome IV and chromosome V in clone EVO2-10. Copy number change refers to the fragment's gain  
 261 or loss during the evolution experiment (i.e. +1 means that one copy was gained). Red highlights gains,  
 262 blue highlights losses. (B) List of genes involved in chromosome segregation that were mutated in evolved  
 263 clones, and their respective role in the process. 'populations hit' is the number of populations where the  
 264 gene was found mutated. '% Mutant reads' was calculated as the average of the mutant read frequencies  
 265 in the different populations where the mutation was detected. (C) Fitness of ancestral, *ctf4Δ* strains that  
 266 carry chromosomally integrated extra copies of cohesin loader genes, relative to the *ctf4Δ* ancestor (*s=0*).  
 267 Error bars represent standard deviations. (D) Premature chromatid separation assay: Cells which contained  
 268 a chromosome marked by a GFP dot (Lac repressor-GFP binding to an array of LacO sites) were arrested  
 269 in metaphase and visualized under the microscope. The number of dots reports on premature sister  
 270 chromatid separation. Two sister chromatids that are still linked to each other produce a single fluorescent  
 271 dot (single, left panel), while cells whose sister chromatids have separated contain two distinguishable dots  
 272 (double, left panel). Quantitation of premature sister chromatid separation in cells carrying extra copies of  
 273 cohesin loader genes (right panel).

274 *CTF4* was originally identified because mutants in this gene reduced the fidelity of  
 275 chromosome transmission (CTF = chromosome transmission fidelity, Spencer et al.,

276 1990); later studies showed that this defect was due to premature sister chromatid  
277 separation, which resulted in increased chromosome loss at cell division (Hanna et al.  
278 2001).

279 We hypothesized that the segmental amplifications of chrIV and chrV were selected to  
280 increase the amount of the cohesin loading complex. To test this idea, we reintroduced a  
281 second copy of these genes in a *ctf4* $\Delta$  ancestor. As predicted by the more frequent  
282 amplification *SCC2*, we found that an extra copy of *SCC4* increased fitness by less than  
283 2%, whereas an extra copy of *SCC2*, or an extra copy of both *SCC2* and *SCC4* increased  
284 fitness by 4-5% (Figure 3C). We examined cells arrested in mitosis to measure the extent  
285 of premature sister chromatid separation in the same strains. Adding extra copies of the  
286 cohesin loader subunits improved sister chromatid cohesion (Figure 3D) and the  
287 amplitude of the improvement in sister cohesion for different strains had the same rank  
288 order as their increase in fitness (Figure 3C). We conclude that the increased copy  
289 number of the cohesin loader subunits is adaptive and alleviates the cohesion defects  
290 induced by the lack of Ctf4.

### 291 **Altered replication dynamics promote DNA synthesis in late replication zones**

292 We found mutations in several genes involved in DNA replication (Figure 4A). Among  
293 these, we found four independent mutations (Figure 4B) that altered three different  
294 subunits of the replicative CMG (Cdc45, MCM, GINS) helicase (Moyer, Lewis, and  
295 Botchan 2006; Labib and Gambus 2007). The CMG helicase is bound in vivo by Ctf4  
296 through the GINS subunit Sld5 (Simon et al. 2014). This binding allows Ctf4 to coordinate  
297 the helicase's progression with primase, which synthesizes the primers for lagging strand  
298 DNA synthesis, and other factors recruited behind the replication fork (Figure 1A, Samora  
299 et al., 2016; Villa et al., 2016). A CMG helicase mutation found in one of the evolved  
300 clones, *sld5-E130K*, increased the fitness of the ancestral *ctf4* $\Delta$  strain (Figure 4C).

301 *IXR1*, a gene indirectly linked to DNA replication, was mutated in several populations  
302 (Figure 4A). *IXR1* encodes for a transcription factor that indirectly and positively regulates  
303 the concentration of deoxyribonucleotide triphosphates (dNTPs, Tsaponina et al., 2011),  
304 the precursors for DNA synthesis. The occurrence of multiple nonsense mutations in this  
305 gene strongly suggested selection to inactivate Ixr1 (Figure S4D). Consistent with this  
306 prediction, we found that engineering either a nonsense mutation (*ixr1-Q332\**) or a gene  
307 deletion conferred a selective advantage to *ctf4* $\Delta$  ancestor cells (Figure 4C).

308 We asked how mutations in the replicative helicase or inactivation of *IXR1* increased the  
309 fitness of *ctf4* $\Delta$  cells. One hypothesis is that the absence of Ctf4 reduces coordination of  
310 the activities required to replicate DNA and leads to the appearance of large regions of  
311 single stranded DNA, which in turn exposes the forks to the risk of nuclease cleavage  
312 or collapse. If this were true, slowing the replicative helicase or the synthesis of the  
313 leading strand would reduce the amount of single stranded DNA near the replication fork  
314 and improve the ability to complete DNA replication before cell division. To test this idea,  
315 we used whole genome sequencing at different points during a synchronous cell cycle to

316 compare the dynamics of DNA replication in four strains: WT, the *ctf4Δ* ancestor, and  
 317 *ctf4Δ* strains containing either the *sld5-E130K* or *ixr1Δ* mutations.

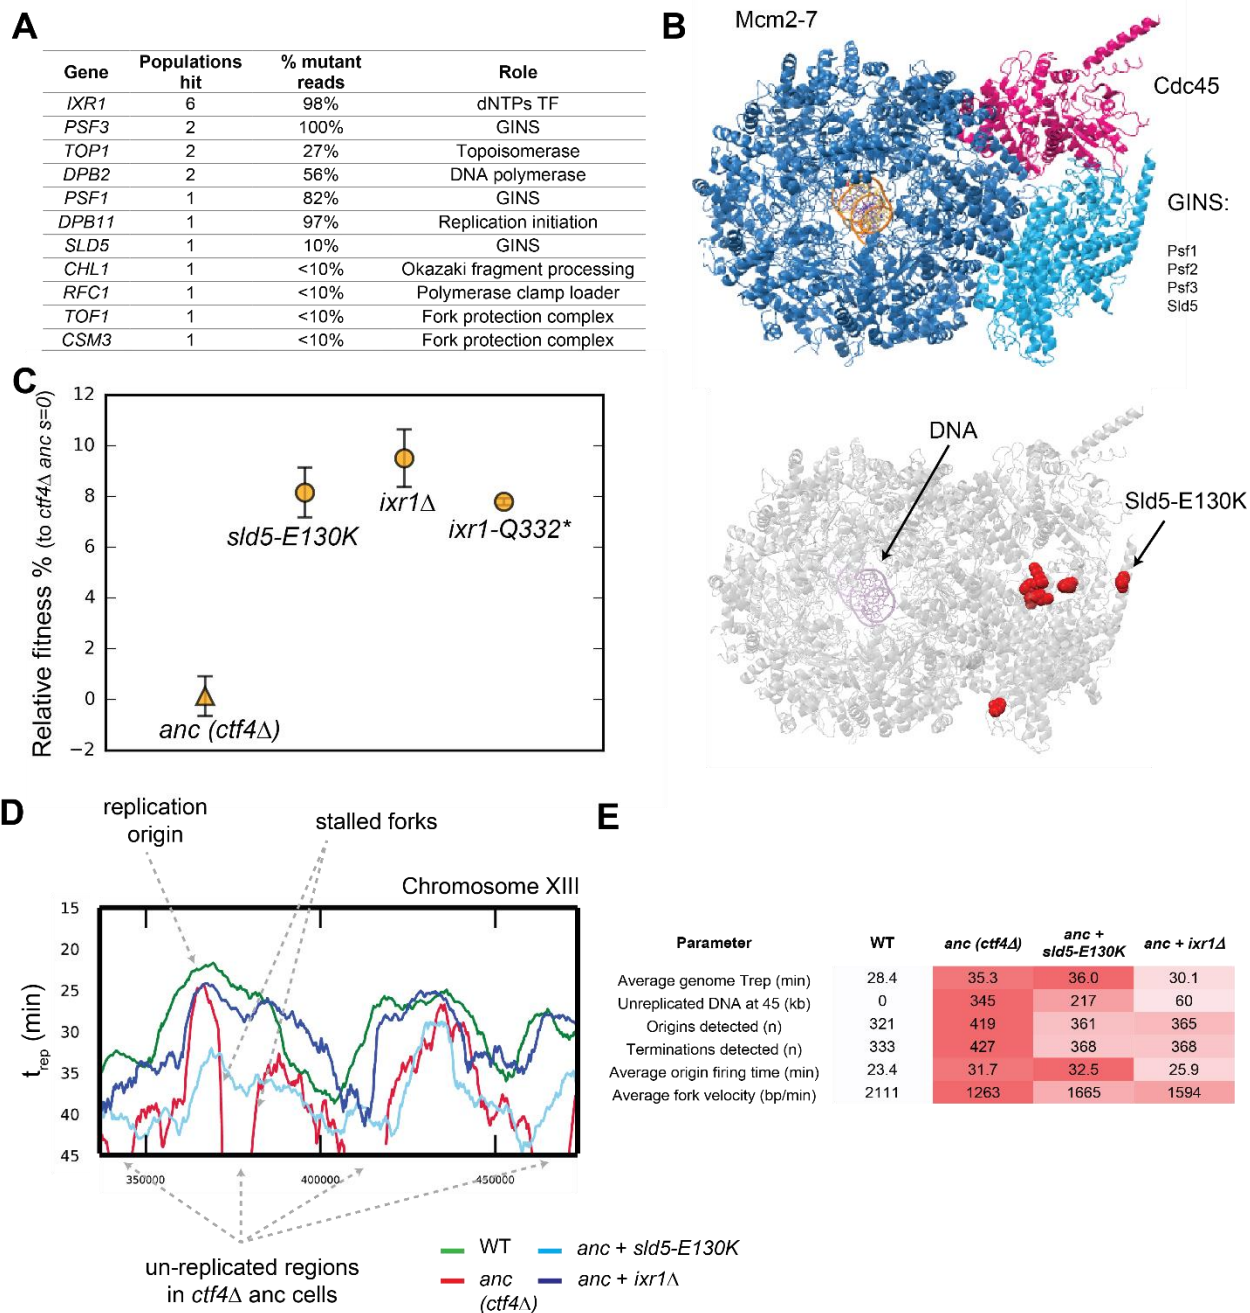

318  
 319 **Figure 4. Adaptive mutations change DNA replication dynamics.** (A) Genes involved in DNA replication  
 320 that were mutated in evolved clones, and their role in replication. 'populations hit' is the number of  
 321 populations where the gene was found mutated. '% Mutant reads' was calculated as the average of the  
 322 mutant read frequencies in the different populations where the mutation was detected. (B) Structure of the  
 323 CMG helicase (PDB:5u8s, upper panel) highlighting the catalytic subunits (Mcm2-7) and the regulatory  
 324 subunits (Cdc45 and GINS). Red spheres represent the residues affected by mutations found in evolved  
 325 clones (lower panel). (C) The fitness of *ctf4Δ* strains carrying reconstructed mutations in the replicative  
 326 helicase (*sld5-E129K*) and in *IXR1* (*ixr1Δ* and *ixr1-Q332\**) relative to the *ctf4Δ* ancestor (*s=0*). Error bars

327 represent standard deviations. **(D)** DNA replication profiles: cells were arrested in G1 and released into a  
328 synchronous S-phase, taking samples every 15 min for whole genome sequencing analysis. Change in  
329 DNA copy number over time were analyzed and used to calculate  $t_{rep}$  (time at which 50% of the cells in the  
330 population have replicated a given region (Figure S4C, see material and methods for details). A snapshot  
331 of chromosome XIII is shown as example, highlighting a DNA replication origin, the presence of stalled  
332 forks and unreplicated regions in *ctf4Δ* cells (which are absent in strains that also carry *sld5-E130K* or *ixr1Δ*  
333 mutations). **(E)** Quantitative analysis of DNA replication. Each parameter was derived from the genome-  
334 wide DNA replication profile of each sample (Fig. S4a, see material and methods for details). Heatmaps  
335 refer to the severity of the defect (white = wt, red = *ctf4Δ* ancestor).

336 We found that cells lacking Ctf4 experience several defects compared to WT: on average,  
337 origins of replication fire later and DNA replication forks proceed more slowly across  
338 replicons, often showing fork stalling (Figure 4D, 4E, S4A). As a consequence of these  
339 two defects, cells still contain significant regions of unreplicated DNA late in S-phase (45  
340 minutes, Figure 4D, 4E, S4a). Both *sld5-E130K* or *ixr1Δ* mutations significantly increase  
341 the average replication fork velocity primarily by avoiding stalls in DNA replication and  
342 thus leading to earlier replication of the regions that replicate late in the ancestral *ctf4Δ*  
343 cells (Figure 4D, 4E, S4A). Altogether, these results show that cells evolved modified  
344 DNA replication dynamics to compensate for defects induced by DNA replication stress.

#### 345 **Epistatic interactions among adaptive mutations dictate evolutionary trajectories**

346 Can we explain how the ancestral *ctf4Δ* strains recovered to within 10% of WT fitness in  
347 only 1000 generations? Although all the mutations that we engineered into *ctf4Δ* ancestor  
348 cells reduce the cost of DNA replication stress, none of them, individually, account for  
349 more than a third of the fitness increase observed over the course of the entire evolution  
350 experiment (Figure 1C). Sequencing individual evolved clones revealed the presence of  
351 mutations in at least two of the three modules whose effects we analyzed in isolation  
352 (Figure S5B, Table S1). We therefore asked if we could recapitulate the fitness of the  
353 evolved clones by adding adaptive mutations from multiple different modules to the *ctf4Δ*  
354 ancestor. We obtained all possible combinations of two, three, and four adaptive mutants,  
355 in the *ctf4Δ* ancestor, by sporulating a diploid strain that was heterozygous for all four  
356 classes of adaptive mutations: inactivation of the DNA damage checkpoint (*rad9Δ*),  
357 amplification of the cohesin loader (an extra copy of *SCC2*), alteration of the replicative  
358 helicase (*sld5-E130K*), and altered regulation of dNTP pools (*ixr1Δ*). We found that the  
359 two mutations that affected DNA replication were negatively epistatic (Figure 5A): in the  
360 presence of *ctf4Δ*, strains that contained both *sld5-E130K* and *ixr1Δ* were not significantly  
361 more fit than strains that contained only *ixr1Δ* and the quadruple mutant (*2X-SCC*, *rad9Δ*,  
362 *sld5-E130K*, *ixr1Δ*) was much less fit than the two triple mutants that contained only one  
363 of the two mutations that affected DNA replication (*2X-SCC*, *rad9Δ*, *sld5-E130K* and *2X-*  
364 *SCC*, *rad9Δ*, *ixr1Δ*). As a result, the two fittest strains carry only three mutations: in both  
365 cases, they affected the three modules we previously characterized: sister chromatid  
366 linkage and chromosome segregation (*2X-SCC2*), the DNA damage checkpoint (*rad9Δ*)  
367 and DNA replication (*sld5-E130K* or *ixr1Δ*). These two strains displayed a fitness



368 comparable to the average of the evolved populations (Figure 1C), suggesting that we  
 369 had recapitulated the major adaptive events in our engineered strains.

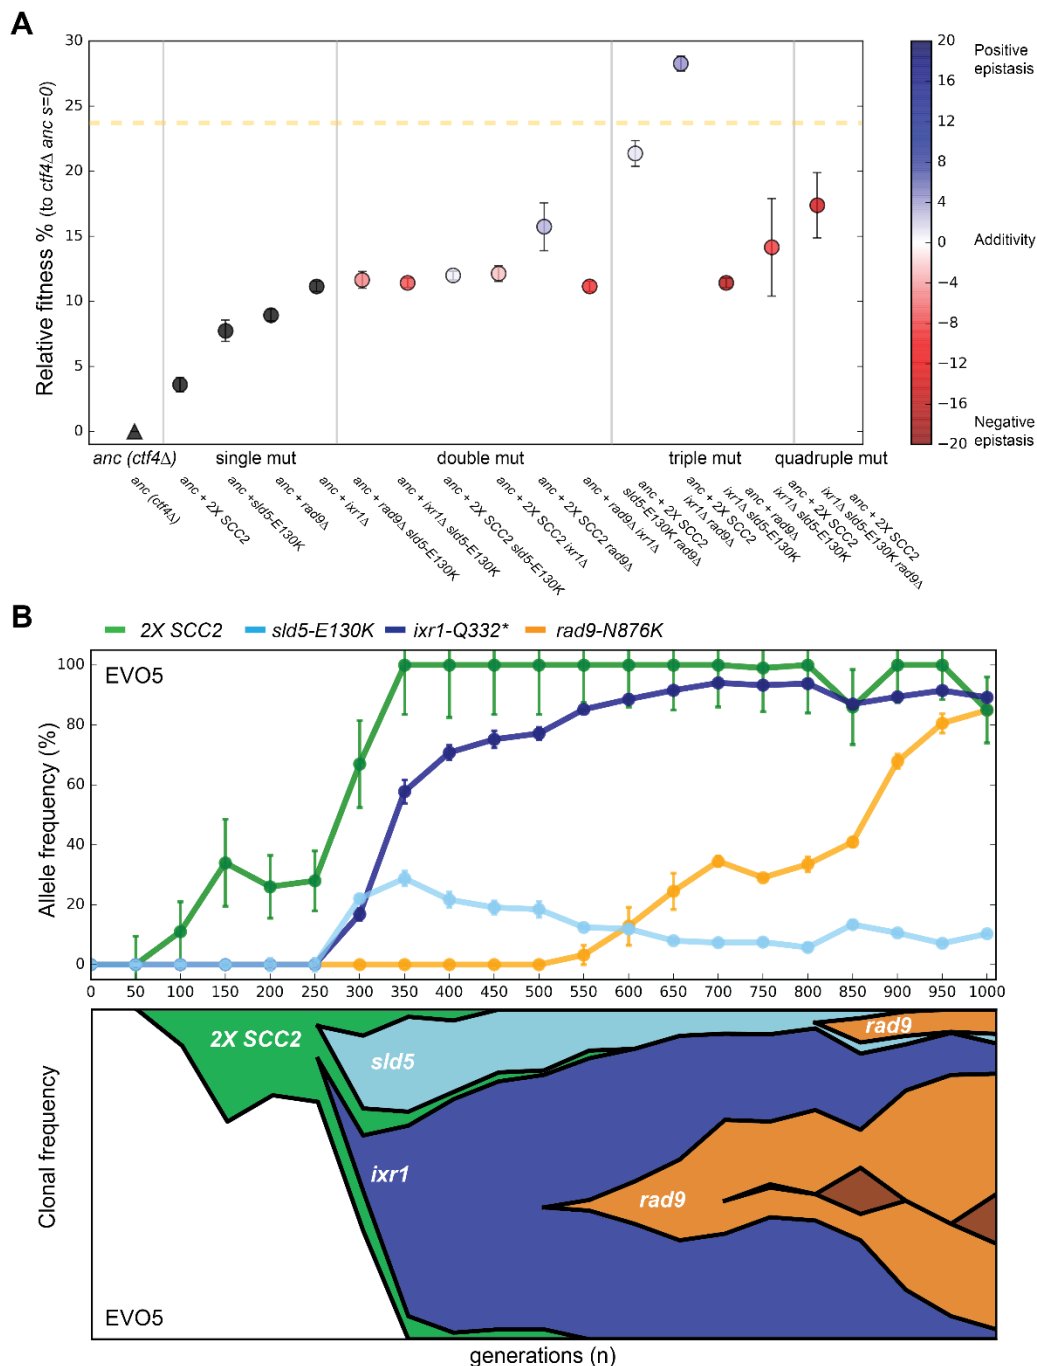

370  
 371 **Figure 5. Epistatic interaction and evolutionary dynamics. (A)** Fitness of all possible combinations of  
 372 four adaptive mutations in the *ctf4Δ* ancestral background. The fitness measurements are relative to *ctf4Δ*  
 373 ancestors ( $s=0$ ). Dashed yellow line represents the average fitness of clones isolated from EVO5. Note  
 374 that, differently from Figure 1C, fitness values are calculated relative to ancestors *ctf4Δ*, and not WT (hence  
 375 the differences in absolute values, see material and methods). Error bars represent standard deviations.  
 376 The fitnesses of individual strains are colored using the heatmap to the right of the figure, which represents  
 377 epistasis: white = perfect additivity, red = negative epistasis (antagonism), blue = positive epistasis



378 (synergy). Colors in heatmap represents the deviation in percentage between the observed fitness and the  
379 one calculated by adding the fitness effects of the individual mutations. **(B)** The temporal spread of mutant  
380 alleles during the experimental evolution of population EVO5 (upper panel). Error bars represent standard  
381 deviations. Genomic DNA was extracted from population samples, mutated loci were PCR amplified and  
382 Sanger sequencing was used to measure allele ratios (upper panel). A Muller diagram representing the  
383 lineages evolving in population EVO5 (lower panel). Data was obtained by combining alleles frequencies  
384 with their linkage as revealed by whole genome sequencing of clones isolated from EVO5 (Figure S5A and  
385 table S1).

386 We asked if the antagonistic interaction between *sld5-E130K* and *ixr1Δ* seen in our  
387 reconstructed strains had also occurred in our evolution experiment. We focused on an  
388 evolved population (EVO5) that carried all the mutations described above and analyzed  
389 the allele frequency in the intermediate samples collected across the evolution  
390 experiment. By following the frequency of alleles within the population and sequencing  
391 individual clones, we found that the mutations in the three modules happened in three  
392 consecutive selective waves: first, cells acquired an extra copy of the cohesin loader-  
393 encoding gene *SCC2*, second, *ixr1-Q332\** and *sld5-E130K* appeared, simultaneously, in  
394 two different lineages, and finally *rad9-N876K* appeared independently in the two lineages  
395 containing either *ixr1-Q332\** or *sld5-E130K* (Figure 5B). After their initial appearance, the  
396 two lineages containing *ixr1-Q332\** or *sld5-E130K* competed with each other for the  
397 remainder of the experiment. In this population, both of the final lineages accumulated  
398 mutations whose interaction was nearly additive or positively epistatic and avoided  
399 combinations that show strong negative epistasis (Figure 5A, S5A). Thus, although  
400 negative epistasis exists, selection finds trajectories that avoid it, as previously observed  
401 in a similar experiment perturbing cell polarity (Laan, Koschwanez, and Murray 2015).

## 402 Discussion

403 Studying the molecular mechanism of evolutionary adaption helps to understand the  
404 balance between change and conservation during the evolution of biological functions.  
405 One approach is to compare processes in closely related organisms and use classical  
406 and molecular genetics to find the genetic variants responsible for inter-species  
407 differences. Another is to damage a process by applying a physiological stress that  
408 reduces the fitness of an organism and use experimental evolution to accumulate, identify  
409 and study the mutations that increase fitness and allow the organism to adapt to the  
410 stress.

411 We followed the latter approach and studied the evolutionary adaptation of cells  
412 experiencing constitutive DNA replication stress induced by the lack of a protein, Ctf4,  
413 that plays an important role in DNA replication. Over 1000 generations, populations  
414 increased from 75 to 90% of the fitness of their wild-type ancestors by sequentially  
415 accumulating mutations affecting three functions that contribute to chromosome  
416 metabolism: DNA replication, chromosome segregation and the cell-cycle checkpoint. We  
417 discuss the molecular mechanisms of adaptation, then consider how they interact to  
418 produce the final evolved phenotype, and close by commenting on the implications of our  
419 results for natural populations and cancer.

420 Cells lacking Ctf4 show an increased frequency of chromosome mis-segregation due to  
421 premature sister chromatid separation, but the mechanism underlying this defect is still  
422 unclear. Seven of our eight populations amplified *SCC2*, which encodes for one of the  
423 subunits of the cohesin loader complex. The simplest explanation for this result is that,  
424 the absence of Ctf4 restricts the productive loading of cohesin molecules that establish  
425 the linkage between sister chromatids. Amplifying the genes for the cohesin loader would  
426 increase its expression, increase the productive cohesin loading and improve the linkage  
427 between sister chromatids. Improving sister chromatid cohesion allows the evolved cells  
428 to segregate their chromosomes more accurately at mitosis, avoiding mitotic delays due  
429 to the spindle checkpoint, decreasing cell death and increasing fitness (Figure 6A).

430 Persistent, cohesin-independent linkages between sister chromatids are an alternative  
431 source of segregation errors. These links include unreplicated regions of DNA or un-  
432 resolved recombination structures (K.-L. Chan, North, and Hickson 2007; Ait Saada et al.  
433 2017). If they persist after the removal of cohesin, they become lingering physical links  
434 (anaphase bridges) between sister chromatids that can lead to chromosome breakage or  
435 mis-segregation during anaphase (Gisselsson et al. 2000; K. L. Chan et al. 2009).  
436 Avoiding these problems requires that replication origins fire efficiently and replication  
437 forks move continuously. Our analysis of the dynamics of DNA replication argues that a  
438 combination of frequent fork stalling and slower origin firing causes under-replication of  
439 certain chromosomal regions in the ancestral *ctf4* $\Delta$  cells. We propose that these defects  
440 selected for mutations that have the apparently paradoxical effect of accelerating DNA  
441 replication by slowing down the replication forks: mutations like *sld5-E130K* and *ixr1* $\Delta$   
442 make forks go slower and this reduced velocity stabilizes the forks, preventing frequent  
443 fork stalling or collapse and producing a higher overall fork velocity (Figure 6B). This  
444 hypothesis is consistent with two observations: first, although the *sld5* mutation is  
445 beneficial in ancestor cells, it decreases the fitness of WT cells (Figure S4E), a result we  
446 would expect from a slower replicative helicase. Second, reduced dNTPs concentrations  
447 reduce fork speed by slowing polymerase incorporation rates (Poli et al. 2012; Pai and  
448 Kearsey 2017; Koren, Soifer, and Barkai 2010) and inactivating *Ixr1* reduces dNTP  
449 concentrations (Tsaponina et al. 2011). We tested this prediction by using an  
450 experimental system to manipulate dNTP concentrations: decreasing dNTP  
451 concentrations increased the fitness of *ctf4* $\Delta$  cells, while inducing higher dNTP production  
452 reduced fitness (Figure S4F).

453 Our evolved populations also accumulated mutations that inactivated the DNA damage  
454 checkpoint (Figure 2B-D). The benefit of these mutations arises from the loss of the DNA  
455 damage checkpoint's ability to delay the start of anaphase (Figure 2E, S2C). The absence  
456 of Ctf4 induces aberrant DNA structures and ssDNA that induce moderate activation of  
457 the checkpoint (Poli et al. 2012), which delays the start of anaphase, increasing doubling  
458 time and thus decreasing fitness (Figure 2D-E). Inactivating Rad9 eliminates the delay,  
459 shortening the time required for mitosis and increasing fitness (Figure 2E, S2C, 6C). This  
460 solution seems counter-intuitive, as the loss of a safeguard mechanism such as the DNA  
461 damage checkpoint should cause genetic instability in cells suffering from replication

462 stress. The resolution of this paradox may lie in the overlapping action of the replication,  
 463 DNA damage, and spindle checkpoints. We propose that the replication and the spindle  
 464 checkpoints delay the cell cycle in response to defects that would kill the ancestral *ctf4Δ*  
 465 cells, such as excessive replication fork collapses and pairs of sister chromatids attached  
 466 to the same spindle pole, whereas the damage checkpoint responds to defects, like  
 467 regions of single-stranded DNA, that can be repaired after cell division.

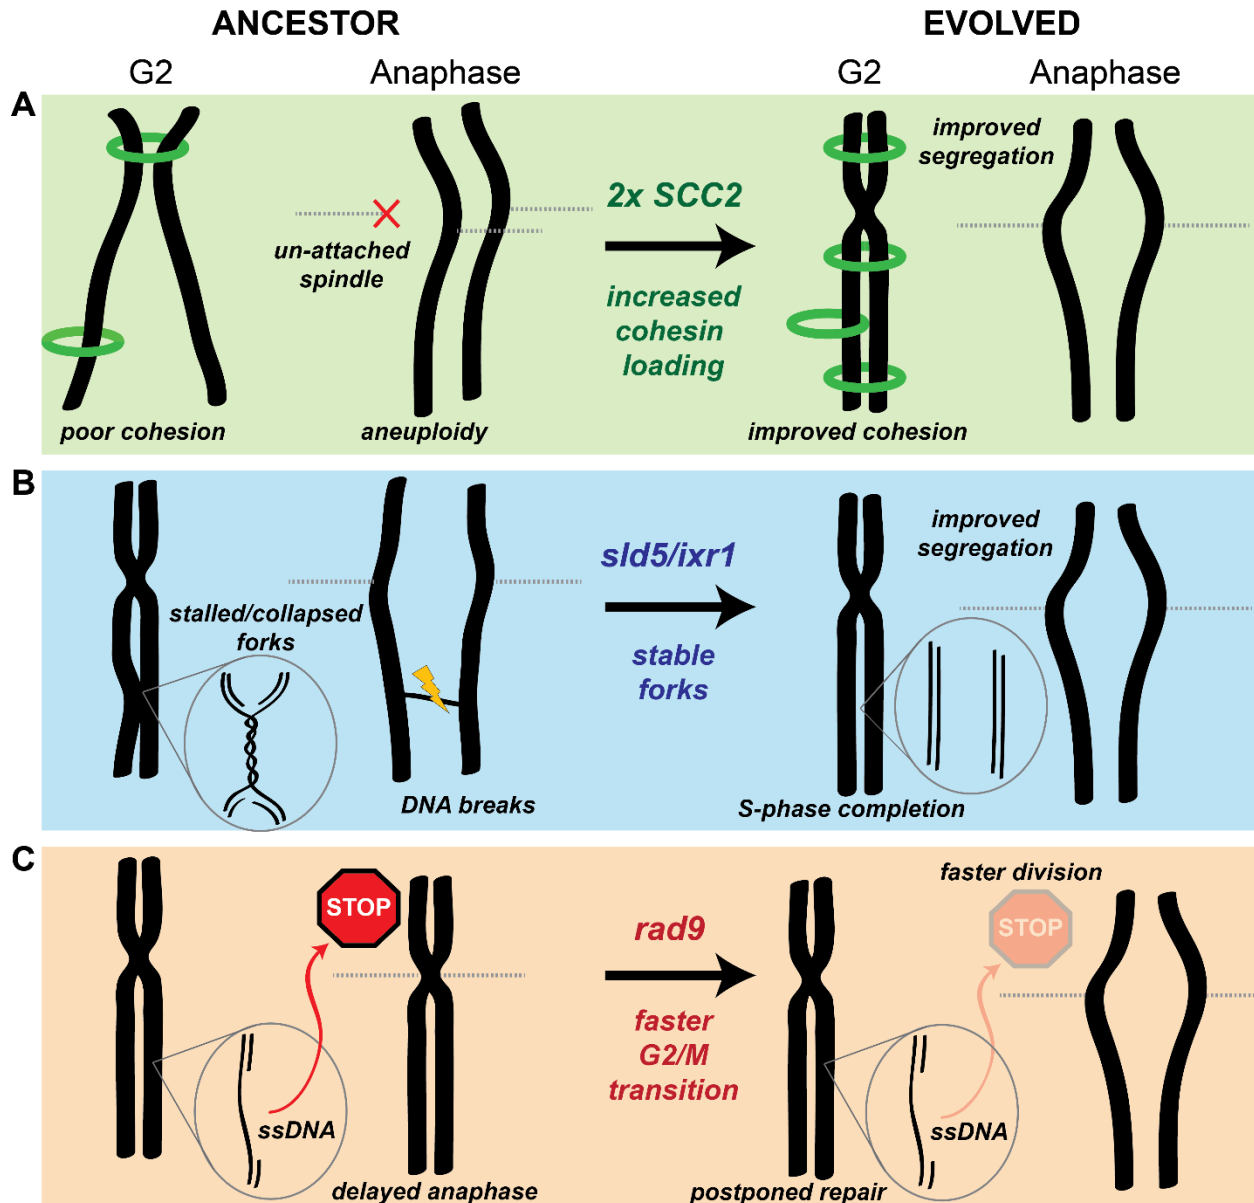

468  
 469 **Figure 6. mechanistic models of adaptation (A)** Amplification of the cohesin loader subunit *SCC2*  
 470 increases cohesin loading and sister chromatid cohesion leading to accurate chromosome segregation **(B)**  
 471 Mutations of the replicative helicase (*sld5*) or in *ixr1* stabilize replication forks and ensure the completion of  
 472 chromosome replication before anaphase. **(C)** mutations in *rad9* abolish the DNA damage checkpoint  
 473 response triggered by stretches of single strand DNA (ssDNA) and allow faster cell division.

474 We asked how the mutants we identified and analyzed interacted with each other and  
475 whether they could explain the fitness of our evolved populations. Measuring allele  
476 frequencies over time and engineering all possible combinations of adaptive mutations  
477 allowed us to propose a detailed model for the evolutionary trajectories of our population  
478 5 (EVO5). Segmental amplifications form at a higher frequency than other types of  
479 mutation (Lynch et al. 2008; Sharp et al. 2018; Yona, Frumkin, and Pilpel 2015); although  
480 most are detrimental, the amplification of specific genes can be advantageous and cause  
481 rapid adaptation (Gresham et al. 2008; Adamo et al. 2012; Hughes et al. 2000; Payen et  
482 al. 2014). Thus, the first event in EVO5 is the spread of a segmental amplification of  
483 chromosome IV containing *SCC2*, which improves fitness by reducing cohesion defects.  
484 In this lineage, mutations in the replicative helicase, *sld5-E130K*, and *ixr1-Q332\** were  
485 then detected almost simultaneously but in different clones. Above, we argue that both  
486 mutations slow replication forks. If there is an optimal fork speed in *ctf4Δ* cells, the  
487 presence of a second mutation of this class might be ineffective or even detrimental if the  
488 forks move too slowly, explaining the negative epistasis we observed. Because the *ixr1*  
489 and *sld5* mutations improve DNA replication to a similar extent, the two lineages have  
490 comparable fitness, explaining the clonal interference that persists for the rest of the  
491 experiment. The last mutation in EVO5 is an identical frameshift mutation in the two  
492 lineages that inactivates Rad9. Interestingly, loss of function mutations in *RAD9*, despite  
493 the large target size of this gene, only appear relatively late during the experiment (Figure  
494 5A and S5B). Furthermore, they happen after other mutations have reduced some of the  
495 problems imposed by replication stress. This order suggests that a sustainable fitness  
496 advantage of mutations of the DNA damage checkpoint may depend on previous changes  
497 in the replication forks stability.

498 Overall, this study reveals the short-term evolutionary plasticity of chromosome  
499 metabolism. A single genetic perturbation that induces DNA replication stress and a  
500 thousand generations are enough to select for significant changes in modules affecting  
501 chromosome metabolism. By the end of the experiment, evolved lineages have  
502 sequentially modified chromosome cohesion, changed the speed of replication forks, and  
503 lost an important cell-cycle response to damage. Changes in these conserved modules  
504 collectively contribute to the evolved phenotype and allow cells to achieve high fitness  
505 despite the presence of constitutive DNA replication stress. This result suggests that  
506 despite their conservation, these modules are evolutionarily plastic and can  
507 accommodate short-term responses to strong perturbations, helping to explain  
508 differences that have accumulated over hundreds to billions of years of evolution.

## 509 **Implications for species evolution in the wild**

510 Despite being conserved across much of evolution, some of the modules that collectively  
511 perform chromosome metabolism and maintain genomes show major important  
512 differences between clades, even within the eukaryotic kingdom (Gourguechon, Holt, and  
513 Cande 2013; Akiyoshi and Gull 2014; Y. Liu, Richards, and Aves 2009). For instance, a  
514 recent study found species in the yeast genus *Hanseniaspora* that lack several important

515 genes implicated in cell cycle progress and DNA repair, including checkpoint factors such  
516 as *RAD9* and *MAD2* (Steenwyk et al. 2019). Trying to explain these differences is  
517 puzzling, especially if *ad-hoc* selectionist hypotheses are invoked for each different  
518 feature. For instance, what could select for a lack of an important safeguard such as the  
519 DNA damage checkpoint? The evolutionary plasticity of chromosome metabolism that we  
520 reveal in this work may help to explain differences like these: mutations in ancestor cells  
521 could initiate an evolutionary trajectory that progressively modifies modules that are  
522 functionally linked and ultimately leads to increased fitness. But what are the initial  
523 perturbations that trigger such changes in fundamental aspects of cell biology? The *ctf4Δ*  
524 cells that we evolved have a 25% fitness difference relative to their wild type ancestors,  
525 meaning that they would rapidly be eliminated from any population of reasonable size.  
526 Given the evolutionary rarity of major rearrangements in cell biology we can invoke events  
527 that are improbable including passing through very small populations bottlenecks or being  
528 attacked by selfish genetic elements whose molecular biology targets an important  
529 protein in an essential process. If the processes that were damaged during these events,  
530 were part of chromosome metabolism, the consequent evolutionary adaptation could lead  
531 to changes in the rates at which the structures of genomes evolve. An increase in these  
532 rates, in turn, could potentially accelerating speciation by making it easier for populations  
533 to acquire meiotically incompatible chromosome configurations.

#### 534 **Implications for cancer evolution**

535 Remarkably, our experiment recapitulates several phenomena observed during cancer  
536 development. Replication stress is thought to be a ubiquitous feature of cancer cells  
537 (Macheret and Halazonetis 2015) with oncogene activation leading to replication stress  
538 and genetic instability (Di Micco et al. 2006; Bartkova et al. 2006; Neelsen et al. 2013).  
539 The absence of Ctf4 in our ancestor cells causes several phenotypes observed in  
540 oncogene-induced DNA replication stress including late-replicating regions, elevated  
541 mutation rates, and chromosome instability (Muñoz and Méndez 2016; Macheret and  
542 Halazonetis 2015; Fumasoni et al. 2015). Furthermore, simply by propagating cells, we  
543 generated evolved lines that mimic many features seen in tumors: a) individual final  
544 populations contain genetically heterogeneous clones, often with different karyotypes  
545 characterized by aneuploidies and chromosomal rearrangements (Lengauer, Kinzler, and  
546 Vogelstein 1998; Laughney et al. 2015; Davoli et al. 2013), b) evolved lineages display  
547 altered DNA replication profiles compared both to WT cells and their mutant ancestors  
548 (Donley and Thayer 2013; Amiel et al. 1999), c) several lines have inactivated the DNA  
549 damage checkpoint (Schultz et al. 2000; Hollstein et al. 1991), and d) improved sister  
550 chromatid cohesion (Rhodes, McEwan, and Horsfield 2011; Sarogni et al. 2019; Xu et al.  
551 2011). All these features are adaptive in our populations, suggesting that similar changes  
552 in cancer cells may be the result of selection and contribute to the accumulation of other  
553 cancer hallmarks during cancer evolution. The similarities between tumorigenesis and  
554 our experiment lead us to speculate that a major selective force in the early stages of  
555 tumor evolution is the need to counteract the fitness costs of replication stress.



556 Understanding the evolutionary mechanisms and dynamics of the adaptation to  
557 replication stress could therefore shed light on the early stage of tumor development.

## 558 **Perspective**

559 In this work, we identified the main adaptive strategies that cells use to adapt to DNA  
560 replication stress induced by the absence of Ctf4. Our results reveal that defects in one  
561 function can be compensated for by two types of mutations: those in the original function  
562 and those in functions that are biologically coupled to it. Focusing on less common  
563 adaptive strategies, apparently unlinked to chromosome metabolism, could therefore  
564 potentially identify novel players that affect genome stability. It would also be interesting  
565 to induce DNA replication stress by other means, such as de-regulating replication  
566 initiation or by inducing re-replication. Analyzing the response to these challenges will  
567 reveal whether the DNA replication module has a common or diverse set of evolutionary  
568 strategies to different perturbations. Finally, this approach could be extended to many  
569 other types of cellular stress, potentially revealing other molecular adaptation aspects that  
570 could collectively help understanding cellular evolution.

## 571 **Material and methods**

### 572 **Strains**

573 All strains were derivatives of a modified version (Rad5<sup>+</sup>) of *S. cerevisiae* strain W303  
574 (*leu2-3,112 trp1-1 can1-100 ura3-1 ade2-1 his3-11,15, RAD5<sup>+</sup>*). TableS4 lists each  
575 strain's genotype. The ancestors of WT and *ctf4Δ* strains were obtained by sporulating a  
576 *CTF4/ctf4Δ* heterozygous diploid. This was done to minimize the selection acting on the  
577 ancestor strains before the beginning of the experiment. Diploid stains were grown on  
578 YPD, transferred to sporulation plates (sodium acetate 0.82%, potassium chloride 0.19%,  
579 sodium chloride 0.12%, magnesium sulfate 0.035%) and incubated for four days at 25°C.  
580 Tetrads were re-suspended in water containing zymolyase (Zymo research, 0.025 u/μl),  
581 incubated at 37°C for 45 sec, and dissected on a YPD plate using a Nikon eclipse E400  
582 microscope equipped with a Schuett-Biotec TDM micro-manipulator. Spores were  
583 allowed to grow into visible colonies and genotyped by presence of genetic markers and  
584 PCR.

### 585 **Media and growth conditions**

586 Standard rich media, YPD (1% Yeast-Extract ,2% Peptone, 2% D-Glucose) was used for  
587 all experiments except in the experiment in Figure S4F where YP + 2% raffinose and YP  
588 + 2% raffinose + 2% galactose were also used. Cells were synchronized either in  
589 metaphase, for 3hrs in YPD containing nocodazole (8 μg/ml, in 1% DMSO) or in G1, for  
590 2hrs in YPD, pH 3.5 containing α-factor (3 μg/ml). Synchronization was verified by looking  
591 at cell morphology. In the experiment in Figure 2E, cells were then washed twice in YPD  
592 containing 50 μg/ml pronase and released in S-phase at 30°C in YPD. α-factor (3 μg/ml)  
593 was added again at 30 min to prevent a second cell cycle from occurring.

## 594 **Experimental evolution**

595 The 16 populations used for the evolution experiment were inoculated in glass tubes  
596 containing 10ml of YPD from 8 *ctf4Δ* colonies (EVO1-8) and 8 WT colonies (EVO9-16).  
597 All the colonies were derived by streaking out *MATa* (EVO1-4 and EVO9-12) or *MATα*  
598 (EVO5-9 and EVO13-16) ancestors. Glass tubes were placed in roller drums at 30°C and  
599 grown for 24hrs. Daily passages were done by diluting 10 μl of the previous culture into  
600 10 ml of fresh YPD (1:1000 dilution, allowing for approximately 10 generations/cycle). All  
601 populations were passaged for a total of 100 cycles (≈1000 generations). Every 5 cycles  
602 (≈50 generations) 800 μl of each evolving population was mixed with 800 μl of 30% v/v  
603 glycerol and stored at -80°C for future analysis (Figure 1B). After 1000 generations four  
604 evolved clones were isolated from the each of the eight *ctf4Δ* evolved populations (a total  
605 of 32 clones) by streaking cells on a YPD plate. Single colonies were then grown in YPD  
606 media and saved in glycerol at -80°C as for the rest of the samples.

## 607 **Whole genome sequencing**

608 Genomic DNA library preparation was performed as in (Koschwanez, Foster, and Murray  
609 2013) with an Illumina Truseq DNA kit. Libraries were then pooled and sequenced either  
610 with an Illumina HiSeq 2500 (125bp paired end reads) or an Illumina NovaSeq (150bp  
611 paired end reads). The samtools software package (samtools.sourceforge.net) was then  
612 used to sort and index the mapped reads into a BAM file. GATK  
613 ([www.broadinstitute.org/gatk](http://www.broadinstitute.org/gatk), McKenna et al., 2010) was used to realign local indels, and  
614 Varscan (varscan.sourceforge.net) was used to call variants. Mutations were found using  
615 a custom pipeline written in Python ([www.python.org](http://www.python.org)). The pipeline  
616 ([github.com/koschwanez/mutantanalysis](https://github.com/koschwanez/mutantanalysis)) compares variants between the reference  
617 strain, the ancestor strain, and the evolved strains. A variant that occurs between the  
618 ancestor and an evolved strain is labeled as a mutation if it either (1) causes a non-  
619 synonymous substitution in a coding sequence or (2) occurs in a regulatory region,  
620 defined as the 500 bp upstream and downstream of the coding sequence (Table S1).

## 621 **Identification of putative adaptive mutations**

622 Three complementary approaches were combined to identify the putative modules and  
623 genes targeted by selection.

624 *Convergent evolution on genes:* This method relies on the assumption that those genes  
625 that have been mutated significantly more than expected by chance alone, represent  
626 cases of convergent evolution among independent lines. The mutations affecting those  
627 genes are therefore considered putatively adaptive. The same procedure was used  
628 independently on the mutations found in WT and *ctf4Δ* evolved lines:

629 We first calculated per-base mutation rates as the total number of mutations in coding  
630 regions occurring in a given background (*ctf4Δ* evolved or WT evolved), divided by the  
631 size of the coding yeast genome in bp (including 1000bp per ORF to account for  
632 regulatory regions)

633 
$$\lambda = \frac{SNPs + indels}{bp_{coding}}$$

634 If the mutations were distributed randomly in the genome at a rate  $\lambda$ , the probability of  
635 finding  $n$  mutations in a given gene of length  $N$  is given by the Poisson distribution:

636 
$$P(n \text{ mutations} | \text{gene of length } N) = \frac{(\lambda N)^n e^{-\lambda N}}{n!}$$

637 For each gene of length  $N$ , we then calculated the probability of finding  $\geq n$  mutations if  
638 these were occurring randomly.

639 
$$P(\neq \geq n \text{ mutations} | \text{gene of length } N) = \sum_{k=n}^{\infty} \frac{(\lambda N)^k e^{-\lambda N}}{k!} = 1 - \frac{\Gamma(n+1, \lambda N)}{n!}$$

640 (Where  $\Gamma$  is the upper incomplete gamma function) which gives us the p-value for the  
641 comparison of the observed mutations with the null, Poisson model. In order to decrease  
642 the number of false positives, we then performed multiple-comparison corrections. The  
643 more stringent Bonferroni correction ( $\alpha=0.05$ ) was applied on the WT evolved mutations  
644 dataset, while Benjamini-Hochberg correction ( $\alpha=0.05$ ) was used for the *ctf4Δ* mutation  
645 dataset. Genes that were found significantly selected in the evolved WT clones (after  
646 Bonferroni correction) were removed from the list of evolved *ctf4Δ* strains. This is  
647 because, since they were target of selection even in WT cells, they are likely involved in  
648 processes that are un-related to DNA replication and are instead associated with  
649 adaptation to sustained growth by serial dilutions. TableS2 lists the mutations detected in  
650 evolved *ctf4Δ* clones, after filtering out those that occurred in genes that were significantly  
651 mutated in the WT populations. Genes significantly selected in these clones are shown  
652 in dark grey (after Benjamini-Hochberg correction with  $\alpha=0.05$ ).

653 *Bulk segregant analysis:* Bulk segregants analysis experimentally identifies putative  
654 adaptive mutations present in a given evolved clone. Briefly, a clone is selected from the  
655 population and then backcrossed to a derivative of the WT ancestor. The resulting diploid  
656 is sporulated, allowing the mutant alleles accumulated during 1000 generations to  
657 randomly segregate among the haploid progeny. The haploid progeny is then selected  
658 for growth (and for *ctf4Δ*) for 50-80 generations in rich media. This regime, as in the  
659 experimental evolution, selects for cells with higher fitness. The cells with causal alleles  
660 therefore quickly increase their frequency within the selected population. Non-causal  
661 alleles segregate randomly and, since they don't contribute to fitness, they are expected  
662 to be present in half of the cells at the end of the progeny selection. Deep sequencing of  
663 the genomic DNA extracted from the selected progeny population reveal the alleles  
664 frequencies and allows the identification of the ones that segregate with the evolved  
665 phenotype (frequency >70% in our case). Bulk segregant analysis was adapted from  
666 (Koschwanez, Foster, and Murray 2013). One clone per population was selected for  
667 further analysis (Figure S1B). In these clones, the original *ctf4Δ* genetic marker *ble* was  
668 substituted with a *KanMX6* cassette by homologous recombination, to allow for a more

669 efficient selection. *ura3-1* evolved clones were mated with either a *MATa* or *MAT $\alpha$* ,  
670 *ura3::NatMX4-pSTE2-URA3* derivative of the WT ancestor. In this strain, the endogenous  
671 *URA3* promoter is replaced with the *STE2* promoter, which is only induced in *MATa* cells,  
672 making it possible to select for *MATa* spores after meiosis. Mating was performed by  
673 mixing cells from the two strains together on a YPD plate with a toothpick and growing  
674 overnight at 30°C. The mating mixtures were then plated on double selective media, and  
675 a diploid strain from each cross was selected from a colony on the plate. To sporulate the  
676 diploid strains, cultures were grown to saturation in YPD, and then diluted 1:100 into YP  
677 2% acetate. The cells were grown in acetate for 12 hrs, pelleted and resuspended in 2%  
678 acetate. After 5 days of incubation on a roller drum at 25°C, sporulation was verified by  
679 observing the formation of tetrads under the microscope. To digest ascii, 10 ml of the  
680 sporulated culture was pelleted and resuspended in 500  $\mu$ l with 250 units of Zymolyase  
681 for 1 hr at 30°C. 4000  $\mu$ l of water and 500  $\mu$ l of 10% Triton X-100 were added, and the  
682 digested spores were then sonicated for 1 min to separate the tetrads. The spores were  
683 spun down slowly (6000 rpm) and resuspended in 50 ml of -URA +G418 media. This  
684 media selects for *ctf4 $\Delta$*  haploid *MATa* cells: neither haploid *MAT $\alpha$*  nor diploid *MATa/MAT $\alpha$*   
685 cells can express *URA3* from the *STE2* promoter. Each culture was then diluted 1:100 in  
686 fresh -URA + G418 media for 10 consecutive passages, allowing for  $\approx$ 66 generations to  
687 occur. Genomic DNA was extracted from the final saturated culture and used for library  
688 preparation and whole genome sequencing as described.

689 *Convergent evolution on modules*: Statistical methods to find frequently mutated genes  
690 are focused on individual genes that contribute to an evolved trait. Functions that can be  
691 modified by affecting several genes would be therefore under-represented in the previous  
692 analysis. To account for this, we looked for gene ontology (GO) terms enriched among  
693 the mutations found to be positively selected in *ctf4 $\Delta$*  evolved clones (tableS1, dark rows),  
694 or found segregating with the evolved phenotype by bulk segregant analysis (Figure  
695 S1B). The combined list of mutations was input as 'multiple proteins' in the STRING  
696 database, which reports on the network of interactions between the input genes  
697 (<https://string-db.org>). Several GO terms describing pathways involved in the DNA and  
698 chromosome metabolism were found enriched among the putative adaptive mutations  
699 provided (Figure S1C and Table S3). Since GO terms are often loosely defined and  
700 partially overlapping, we manually identified, based on literature search, four modules as  
701 putative targets of selection: DNA replication, chromosome segregation, cell cycle  
702 checkpoints, and chromatin modifiers. The full list of mutated genes observed in the  
703 evolved *ctf4 $\Delta$*  clones was then used as input in the STRING database. This was done to  
704 account for genes, that despite not being identified as containing adaptive mutations by  
705 the previous techniques, are part of modules under selection: mutations in these genes  
706 could have contributed to the final phenotype. The interaction network between mutated  
707 genes was downloaded and curated in Cytoscape. For clarity of representation, only  
708 those nodes strongly connected to the previously identified modules are shown in Figure  
709 1D.

710

## 711 **Fitness assays**

712 To measure relative fitness, we competed the ancestors and evolved strains against  
713 reference strains. Both WT (Figure 1C, S1A, S4E, S5A) and *ctf4Δ* (Figure 2D, S2C, 3C,  
714 4C, S4E-F, 5A) reference strains were used. A *pFA6a-prACT1-yCerulean-HphMX4*  
715 plasmid was digested with *AgeI* and integrated at one of the *ACT1* loci of the original  
716 heterozygous diploid (*CTF4/ctf4Δ*) strain. This allow for the expression of fluorescent  
717 protein yCerulean under the strong actin promoter. The heterozygous diploid was then  
718 sporulated and dissected to obtain fluorescent WT or *ctf4Δ* reference haploid strains. For  
719 measuring the relative fitness, 10 ml of YPD were inoculated in individual glass tubes with  
720 either the frozen reference or test strains. After 24 hrs the strains were mixed in fresh 10  
721 ml YPD tubes at a ratio dependent on the expected fitness of the test strain compared to  
722 the reference (i.e 1:1 if believed to be nearly equally fit) and allowed to proliferate at 30°C  
723 for 24 hrs. 10 μl of samples were taken from this mixed culture (day 0) and the ratio of  
724 the two starting strains was immediately measured. Tubes were then cultured following  
725 in the same conditions as the evolution experiment by diluting them 1:1000 into fresh  
726 media every 24hrs for 4 days, monitoring the strain ratio at every passage. Strain ratios  
727 and number of generations occurred between samples were measured by flow cytometer  
728 (Fortessa, BD Bioscience). Ratios *r* were calculated based on the number of fluorescent  
729 and non-fluorescent events detected by the flow cytometer:

$$730 \quad r = \frac{NonFluorescent_{events}}{Fluorescent_{events}}$$

731 Generations between time points *g* were calculated based on total events measured at  
732 time 0 hr and time 24 hrs:

$$733 \quad g = \frac{\log_{10}(Events_{t24}/events_{t0})}{\log_{10} 2}$$

734 Linear regression was performed between the (*g*,  $\log_e r$ ) points relative to every sample.  
735 Relative fitness *s* was calculated as the slope of the resulting line. Note that the absolute  
736 values of relative fitness change depending on the reference strain used: a strain that  
737 shows 27% increased fitness when measured against *ctf4Δ* (that is 27% less fit then WT),  
738 does not equate the WT fitness. This is because a 27% increase of 0.73 (*ctf4Δ* fitness  
739 compared to WT) gives 0.93, hence a 7% fitness defect compared to WT.

## 740 **Cell cycle profiles**

741 Cell cycle analysis was conducted as previously described (Fumasoni et al. 2015). In  
742 brief,  $1 \times 10^7$  cells were collected from cultures by centrifugation, and resuspended in 70%  
743 ethanol for 1 hr. Cells were then washed in 50 mM Tris-HCl (pH 7.5), resuspended in the  
744 same buffer containing 0.4 μg/ml of RNaseA and incubated at 37°C for at least 2 hrs.  
745 Cells were collected and further treated overnight at 37°C in 50 mM Tris-HCl (pH 7.5)  
746 containing proteinase K (0.4 μg/ml). Cells were then centrifuged and washed in 50 mM  
747 Tris-HCl (pH 7.5). Samples were then diluted 10-20-fold in 50 mM Tris-HCl (pH 7.8)



748 containing 1 mM Sytox green, and analyzed by flow cytometer (Fortessa, BD Bioscience).  
749 The FITC channel was used to quantify the amounts of stained-DNA per cell. Cell cycle  
750 profiles were analyzed and visualized in Flowjo (BD). The percentage of genome  
751 replicated at 30 min was calculated based on the cell cycle profile as follow  $G_{rep} =$   
752  $DNA\ content\ mode / (2C - 1C) * 100$ . The height of the 1C and 2C peaks was obtained  
753 as the max cells count reached by the respective peak.

#### 754 **Copy number variations (CNVs) detection by sequencing**

755 Whole genome sequencing and read mapping was done as previously described. The  
756 read-depths for every unique 100 bp region in the genome were then obtained by using  
757 the VarScan copynumber tool. A custom pipeline written in python was used to visualize  
758 the genome-wide CNVs. First, the read-depths of individual 100 bp windows were  
759 normalized to the genome-wide median read-depth to control for differences in  
760 sequencing depths between samples. The coverage of the ancestor strains was then  
761 subtracted from the one of the evolved lines to reduce the noise in read depth visualization  
762 due to the repeated sequences across the genome. The resulting CNVs were smoothed  
763 across five 100 bp windows for a simpler visualization. Final CNVs were then plotted  
764 relative to their genomic coordinate at the center of the smoothed window. Since the WT  
765 CNVs were subtracted from the evolved CNVs, the y axis refers to the copy number  
766 change occurred during evolution (i.e. +1 means that one an extra copy of a chromosome  
767 fragment has been gained).

#### 768 **Premature sister chromatid separation assay**

769 Logarithmically growing cells were arrested in metaphase as previously described.  
770 Samples were then collected and fixed in 4% formaldehyde for 5 min at room  
771 temperature. Cells were washed In SK buffer (1M sorbitol, 0.05 M K<sub>2</sub>PO<sub>4</sub>) and sonicated  
772 for 8 seconds prior to microscope analysis. Images were acquired with a Nikon eclipse Ti  
773 spinning-disk confocal microscope using a 100X oil immersion lens. Fluorescence was  
774 visualized with a conventional FITC excitation filter and a long pass emission filter.  
775 Images were analyzed using ImageJ.

#### 776 **DNA replication profiles**

777 DNA replication profiling was adapted from Müller et al. 2014; Saayman, Ramos-Pérez,  
778 and Brown 2018; Bar-Ziv, Voichek, and Barkai 2016. Genomic DNA, library preparation  
779 and CNVs detection were performed independently on all the collected samples as  
780 previously described. A custom python script was used to analyze the CNVs from multiple  
781 time points from the same strain to produce DNA replication profiles. Read-depths of  
782 individual 100 bp windows were normalized to the genome-wide median read-depth to  
783 control for differences in sequencing depths between consecutive samples. To allow for  
784 intra-strain comparison, coverage was then scaled according to the sample DNA content  
785 measured as the median of the cell-cycle profile obtained by flow cytometry. The resulting  
786 coverage was then averaged across multiple 100 bp windows and a polynomial data  
787 smoothing filter (Savitsky-Golay) was applied to the individual coverage profiles to filter

788 out noise. Replication timing  $t_{rep}$  is defined as the time at which 50% of the cells in the  
789 population replicated a given region of the genome (Figure S4C), which is equivalent to  
790 an overall relative coverage of 1.5x, since 1x corresponds to an unreplicated region and  
791 2x to a fully replicated one. The replication timing  $t_{rep}$  was calculated by linearly  
792 interpolating the two time points with coverage lower and higher than 1.5x and using such  
793 interpolation to compute the time corresponding to 1.5x coverage. Final  $t_{rep}$  were then  
794 plotted relative to their window genomic coordinates. Unreplicated regions at 45 min were  
795 calculated as the sum of all regions with  $t_{rep}>45\text{min}$ . To find DNA replication origins, the  
796  $t_{rep}$  profiles along the genome were filtered using a Fourier low-pass filter to remove local  
797 minima and then used to find local peaks. Only origins giving rise to long replicons were  
798 used to measure fork velocity. Fork velocity was calculated by dividing the distance  
799 between the origin and the closest termination site by the time required to replicate the  
800 region. Duplicate replication profiles were obtained from two independent experiments for  
801 each strain. Reproducibility was confirmed with qualitatively and quantitatively  
802 comparable results across duplicates. The reliability of the pipeline was assessed by  
803 qualitatively and quantitatively comparing our WT results with previously reported  
804 measurements (Raghuraman et al. 2001; Müller et al. 2014).

#### 805 **Analysis of allele frequency by sanger sequencing**

806 Allele frequencies within populations were estimated as in (Koschwanez, Foster, and  
807 Murray 2013). In brief, chromatograms obtained by sanger sequencing were used to  
808 estimate the fraction of mutant alleles in a population at different time points during the  
809 evolution. The fraction of mutant alleles in the population was assumed to be the height  
810 of the mutant allele peak divided by the height of the mutant allele peak plus the ancestor  
811 allele peak. The values from two independent sanger sequencing reactions, obtained by  
812 primers lying upstream and downstream the mutations, were averaged to obtain the final  
813 ratios. Values below the approximate background level were assumed to be zero, and  
814 values above 95% were assumed to be 100%.

#### 815 **Segmental amplification detection by digital PCR**

816 Droplet digital PCR was used to detect the amplifications of the fragment containing  
817 *SCC2* at different time points during evolution. Genomic DNA was prepared and diluted  
818 accordingly. Bio-Rad ddPCR supermix for probes (no dUTP) was used to prepare probes  
819 specific to *SCC2* and the centromere of chromosome IV. A Bio-Rad QX200 Droplet  
820 Generator was used to generate droplets containing genomic DNA and probes. The  
821 droplet PCR was performed in a Bio-Rad thermocycler and analyzed with a Bio-Rad  
822 QX200 Droplet Reader. *SCC2*/Centromere ratios were then used to quantify *SCC2* copy  
823 numbers. To estimate the percent of cells carrying the *SCC2* amplification within a  
824 population we assumed that the allele spreading in the population was a duplication of  
825 *SCC2* (as indicated by the EVO5 copy number analysis). Values above 95% were  
826 assumed to be 100%.

827

## 828 **Acknowledgments**

829 We thank Stephen Elledge and Philip Zegerman for sharing yeast strains; Andrea  
830 Giometto, Mayra Garcia and John Koschwanez for assistance in data analysis; Stephen  
831 Bell, Michael Desai, Michael Laub, Bodo Stern, Sriram Srikant, Thomas LaBar and Yi  
832 Chen for critical reading of the manuscript; Claire Hartman and Zachary Niziolek from the  
833 Harvard Bauer Core Facility for technical assistance. Yoav Voichek and Felix Jonas for  
834 advice on DNA replication profiling; We thank the members of the Murray and Nelson  
835 labs for helpful discussions. This work was supported by NIH grant RO1-GM43987 and  
836 by the NSF-Simons Center for Mathematical and Statistical Analysis of Biology at Harvard  
837 (#1764269) to AWM. MF gratefully acknowledges fellowship support from the Human  
838 Frontiers Science Program (LT000786/2016-L), EMBO (ALTF 485-2015) and AIRC  
839 (iCARE 17957).

## 840 **Author contributions**

841 MF designed and performed the research, analyzed and interpreted the data, and wrote  
842 the paper. AWM designed the research, interpreted the data, and wrote the paper.

## 843 **References**

- 844 Abe, Takuya, Ryotaro Kawasumi, Michele Giannattasio, Sabrina Dusi, Yui Yoshimoto,  
845 Keiji Miyata, Koyuki Umemura, Kouji Hirota, and Dana Branzei. 2018. "AND-1 Fork  
846 Protection Function Prevents Fork Resection and Is Essential for Proliferation."  
847 *Nature Communications* 9 (1): 3091. <https://doi.org/10.1038/s41467-018-05586-7>.
- 848 Adamo, G. M., M. Lotti, M. J. Tamas, and S. Brocca. 2012. "Amplification of the CUP1  
849 Gene Is Associated with Evolution of Copper Tolerance in *Saccharomyces*  
850 *Cerevisiae*." *Microbiology* 158 (Pt\_9): 2325–35.  
851 <https://doi.org/10.1099/mic.0.058024-0>.
- 852 Ait Saada, Anissia, Ana Teixeira-Silva, Ismail Iraqui, Audrey Costes, Julien Hardy,  
853 Giulia Paoletti, Karine Fréon, and Sarah A.E. Lambert. 2017. "Unprotected  
854 Replication Forks Are Converted into Mitotic Sister Chromatid Bridges." *Molecular*  
855 *Cell* 66 (3): 398-410.e4. <https://doi.org/10.1016/j.molcel.2017.04.002>.
- 856 Akiyoshi, Bungo, and Keith Gull. 2014. "Discovery of Unconventional Kinetochores in  
857 Kinetoplastids." *Cell* 156 (6): 1247–58. <https://doi.org/10.1016/J.CELL.2014.01.049>.
- 858 Amiel, A., I. Kirgner, E. Gaber, Y. Manor, M. Fejgin, and M. Lishner. 1999. "Replication  
859 Pattern in Cancer: Asynchronous Replication in Multiple Myeloma and in  
860 Monoclonal Gammopathy." *Cancer Genetics and Cytogenetics* 108 (1): 32–37.  
861 [https://doi.org/10.1016/S0165-4608\(98\)00107-1](https://doi.org/10.1016/S0165-4608(98)00107-1).
- 862 Aves, Stephen J, Yuan Liu, and Thomas A Richards. 2012. "Evolutionary Diversification  
863 of Eukaryotic DNA Replication Machinery." *Sub-Cellular Biochemistry* 62 (January):  
864 19–35. [https://doi.org/10.1007/978-94-007-4572-8\\_2](https://doi.org/10.1007/978-94-007-4572-8_2).
- 865 Bar-Ziv, Raz, Yoav Voichek, and Naama Barkai. 2016. "Chromatin Dynamics during

- 866 DNA Replication.” *Genome Research* 26 (9): 1245–56.  
867 <https://doi.org/10.1101/gr.201244.115>.
- 868 Barrick, Jeffrey E., and Richard E. Lenski. 2013. “Genome Dynamics during  
869 Experimental Evolution.” *Nature Reviews Genetics* 14 (12): 827–39.  
870 <https://doi.org/10.1038/nrg3564>.
- 871 Bartkova, Jirina, Nousin Rezaei, Michalis Liontos, Panagiotis Karakaidos, Dimitris  
872 Kletsas, Natalia Issaeva, Leandros-Vassilios F. Vassiliou, et al. 2006. “Oncogene-  
873 Induced Senescence Is Part of the Tumorigenesis Barrier Imposed by DNA  
874 Damage Checkpoints.” *Nature* 444 (7119): 633–37.  
875 <https://doi.org/10.1038/nature05268>.
- 876 Bell, Stephen P., and Karim Labib. 2016. “Chromosome Duplication in *Saccharomyces*  
877 *Cerevisiae*.” *Genetics* 203 (3).
- 878 Branzei, Dana, and Marco Foiani. 2010. “Maintaining Genome Stability at the  
879 Replication Fork.” *Nature Reviews. Molecular Cell Biology* 11 (MARCh): 208–19.  
880 <https://doi.org/10.1038/nrm2852>.
- 881 Burhans, William C, and Martin Weinberger. 2007. “DNA Replication Stress, Genome  
882 Instability and Aging.” *Nucleic Acids Research* 35 (22): 7545–56.  
883 <https://doi.org/10.1093/nar/gkm1059>.
- 884 Buskirk, Sean W, Ryan Emily Peace, and Gregory I Lang. 2017. “Hitchhiking and  
885 Epistasis Give Rise to Cohort Dynamics in Adapting Populations.” *Proceedings of*  
886 *the National Academy of Sciences of the United States of America* 114 (31): 8330–  
887 35. <https://doi.org/10.1073/pnas.1702314114>.
- 888 Chan, Kok-Lung, Phillip S North, and Ian D Hickson. 2007. “BLM Is Required for Faithful  
889 Chromosome Segregation and Its Localization Defines a Class of Ultrafine  
890 Anaphase Bridges.” *The EMBO Journal* 26 (14): 3397–3409.  
891 <https://doi.org/10.1038/sj.emboj.7601777>.
- 892 Chan, Kok Lung, Timea Palmai-Pallag, Songmin Ying, and Ian D. Hickson. 2009.  
893 “Replication Stress Induces Sister-Chromatid Bridging at Fragile Site Loci in  
894 Mitosis.” *Nature Cell Biology* 11 (6): 753–60. <https://doi.org/10.1038/ncb1882>.
- 895 Ciosk, Rafal, Masaki Shirayama, Anna Shevchenko, Tomoyuki Tanaka, Attila Toth,  
896 Andrej Shevchenko, and Kim Nasmyth. 2000. “Cohesin’s Binding to Chromosomes  
897 Depends on a Separate Complex Consisting of Scc2 and Scc4 Proteins.” *Molecular*  
898 *Cell* 5 (2): 243–54. [https://doi.org/10.1016/S1097-2765\(00\)80420-7](https://doi.org/10.1016/S1097-2765(00)80420-7).
- 899 Cross, Frederick R, Nicolas E Buchler, and Jan M Skotheim. 2011. “Evolution of  
900 Networks and Sequences in Eukaryotic Cell Cycle Control.” *Philosophical*  
901 *Transactions of the Royal Society of London. Series B, Biological Sciences* 366  
902 (1584): 3532–44. <https://doi.org/10.1098/rstb.2011.0078>.
- 903 Davoli, Teresa, Andrew Wei Xu, Kristen E. Mengwasser, Laura M. Sack, John C. Yoon,  
904 Peter J. Park, and Stephen J. Elledge. 2013. “Cumulative Haploinsufficiency and  
905 Triplosensitivity Drive Aneuploidy Patterns and Shape the Cancer Genome.” *Cell*



- 906 155 (4): 948–62. <https://doi.org/10.1016/J.CELL.2013.10.011>.
- 907 Dewar, James M., and Johannes C. Walter. 2017. “Mechanisms of DNA Replication  
908 Termination.” *Nature Reviews Molecular Cell Biology* 18 (8): 507–16.  
909 <https://doi.org/10.1038/nrm.2017.42>.
- 910 Donley, Nathan, and Mathew J. Thayer. 2013. “DNA Replication Timing, Genome  
911 Stability and Cancer: Late and/or Delayed DNA Replication Timing Is Associated  
912 with Increased Genomic Instability.” *Seminars in Cancer Biology* 23 (2): 80–89.  
913 <https://doi.org/10.1016/J.SEMCANCER.2013.01.001>.
- 914 Elledge, S. J. 1996. “Cell Cycle Checkpoints: Preventing an Identity Crisis.” *Science* 274  
915 (5293): 1664–72. <https://doi.org/10.1126/science.274.5293.1664>.
- 916 Filteau, Marie, Véronique Hamel, Marie-Christine Pouliot, Isabelle Gagnon-Arsenault,  
917 Alexandre K Dubé, and Christian R Landry. 2015. “Evolutionary Rescue by  
918 Compensatory Mutations Is Constrained by Genomic and Environmental  
919 Backgrounds.” *Molecular Systems Biology* 11 (10): 832.  
920 <https://doi.org/10.15252/msb.20156444>.
- 921 Fraser, Hunter B, Aaron E Hirsh, Lars M Steinmetz, Curt Scharfe, and Marcus W  
922 Feldman. 2002. “Evolutionary Rate in the Protein Interaction Network.” *Science*  
923 (*New York, N. Y.*) 296 (5568): 750–52. <https://doi.org/10.1126/science.1068696>.
- 924 Fumasoni, Marco, Katharina Zwicky, Fabio Vanoli, Massimo Lopes, and Dana Branzei.  
925 2015. “Error-Free DNA Damage Tolerance and Sister Chromatid Proximity during  
926 DNA Replication Rely on the Pol $\alpha$ /Primase/Ctf4 Complex.” *Molecular Cell*.  
927 <https://doi.org/10.1016/j.molcel.2014.12.038>.
- 928 Gaillard, H el ene, Tatiana Garc ia-Muse, and Andr es Aguilera. 2015. “Replication Stress  
929 and Cancer.” *Nature Reviews Cancer* 15 (5): 276–89.  
930 <https://doi.org/10.1038/nrc3916>.
- 931 Gambus, Agnieszka, Frederick van Deursen, Dimitrios Polychronopoulos, Magdalena  
932 Foltman, Richard C Jones, Ricky D Edmondson, Arturo Calzada, and Karim Labib.  
933 2009. “A Key Role for Ctf4 in Coupling the MCM2-7 Helicase to DNA Polymerase  
934 Alpha within the Eukaryotic Replisome.” *The EMBO Journal* 28 (19): 2992–3004.  
935 <https://doi.org/10.1038/emboj.2009.226>.
- 936 Gisselsson, D, L Pettersson, M H oglund, M Heidenblad, L Gorunova, J Wiegant, F  
937 Mertens, P Dal Cin, F Mitelman, and N Mandahl. 2000. “Chromosomal Breakage-  
938 Fusion-Bridge Events Cause Genetic Intratumor Heterogeneity.” *Proceedings of*  
939 *the National Academy of Sciences of the United States of America* 97 (10): 5357–  
940 62. <https://doi.org/10.1073/pnas.090013497>.
- 941 Gourguechon, St ephane, Liam J Holt, and W Zacheus Cande. 2013. “The Giardia Cell  
942 Cycle Progresses Independently of the Anaphase-Promoting Complex.” *Journal of*  
943 *Cell Science* 126 (Pt 10): 2246–55. <https://doi.org/10.1242/jcs.121632>.
- 944 Gresham, David, Michael M. Desai, Cheryl M. Tucker, Harry T. Jenq, Dave A. Pai,  
945 Alexandra Ward, Christopher G. DeSevo, David Botstein, and Maitreya J. Dunham.



- 946 2008. "The Repertoire and Dynamics of Evolutionary Adaptations to Controlled  
947 Nutrient-Limited Environments in Yeast." Edited by Michael Snyder. *PLoS Genetics*  
948 4 (12): e1000303. <https://doi.org/10.1371/journal.pgen.1000303>.
- 949 Hanna, Joseph S, Evgueny S Kroll, Victoria Lundblad, and Forrest a Spencer. 2001.  
950 "Saccharomyces Cerevisiae CTF18 and CTF4 Are Required for Sister Chromatid  
951 Cohesion." *Molecular and Cellular Biology* 21 (9): 3144–58.  
952 <https://doi.org/10.1128/MCB.21.9.3144-3158.2001>.
- 953 Harcombe, WR, R Springman, and JJ Bull. 2009. "Compensatory Evolution for a Gene  
954 Deletion Is Not Limited to Its Immediate Functional Network." *BMC Evolutionary*  
955 *Biology* 9 (1): 106. <https://doi.org/10.1186/1471-2148-9-106>.
- 956 Hollstein, M, D Sidransky, B Vogelstein, and C C Harris. 1991. "P53 Mutations in  
957 Human Cancers." *Science (New York, N.Y.)* 253 (5015): 49–53.  
958 <https://doi.org/10.1126/science.1905840>.
- 959 Hughes, Timothy R., Christopher J. Roberts, Hongyue Dai, Allan R. Jones, Michael R.  
960 Meyer, David Slade, Julja Burchard, et al. 2000. "Widespread Aneuploidy Revealed  
961 by DNA Microarray Expression Profiling." *Nature Genetics* 25 (3): 333–37.  
962 <https://doi.org/10.1038/77116>.
- 963 Jerison, Elizabeth R., and Michael M. Desai. 2015. "Genomic Investigations of  
964 Evolutionary Dynamics and Epistasis in Microbial Evolution Experiments." *Current*  
965 *Opinion in Genetics and Development* 35: 33–39.  
966 <https://doi.org/10.1016/j.gde.2015.08.008>.
- 967 Koren, Amnon, Ilya Soifer, and Naama Barkai. 2010. "MRC1-Dependent Scaling of the  
968 Budding Yeast DNA Replication Timing Program." *Genome Research* 20 (6): 781–  
969 90. <https://doi.org/10.1101/gr.102764.109>.
- 970 Koschwanez, John H., Kevin R. Foster, and Andrew W. Murray. 2013. "Improved Use of  
971 a Public Good Selects for the Evolution of Undifferentiated Multicellularity." *ELife* 2  
972 (January): e00367. <https://doi.org/10.7554/eLife.00367>.
- 973 Kouprina, N, E Kroll, V Bannikov, V Bliskovsky, R Gizatullin, A Kirillov, B Shestopalov,  
974 et al. 1992. "CTF4 (CHL15) Mutants Exhibit Defective DNA Metabolism in the  
975 Yeast *Saccharomyces Cerevisiae*." *Molecular and Cellular Biology* 12 (12): 5736–  
976 47. <http://www.ncbi.nlm.nih.gov/pubmed/1341195>.
- 977 Laan, Liedewij, John H Koschwanez, and Andrew W Murray. 2015. "Evolutionary  
978 Adaptation after Crippling Cell Polarization Follows Reproducible Trajectories."  
979 *ELife* 4 (October): e09638. <https://doi.org/10.7554/eLife.09638>.
- 980 Labib, Karim, and Agnieszka Gambus. 2007. "A Key Role for the GINS Complex at  
981 DNA Replication Forks." *Trends in Cell Biology* 17 (6): 271–78.  
982 <https://doi.org/10.1016/J.TCB.2007.04.002>.
- 983 Lang, Gregory I., Daniel P. Rice, Mark J. Hickman, Erica Sodergren, George M.  
984 Weinstock, David Botstein, and Michael M. Desai. 2013. "Pervasive Genetic  
985 Hitchhiking and Clonal Interference in Forty Evolving Yeast Populations." *Nature*

- 986 500 (7464): 571–74. <https://doi.org/10.1038/nature12344>.
- 987 Laughney, Ashley M., Sergi Elizalde, Giulio Genovese, and Samuel F. Bakhom. 2015.  
988 “Dynamics of Tumor Heterogeneity Derived from Clonal Karyotypic Evolution.” *Cell*  
989 *Reports* 12 (5): 809–20. <https://doi.org/10.1016/J.CELREP.2015.06.065>.
- 990 Lengauer, Christoph, Kenneth W. Kinzler, and Bert Vogelstein. 1998. “Genetic  
991 Instabilities in Human Cancers.” *Nature* 396 (6712): 643–49.  
992 <https://doi.org/10.1038/25292>.
- 993 Levy, Sasha F., Jamie R. Blundell, Sandeep Venkataram, Dmitri A. Petrov, Daniel S.  
994 Fisher, and Gavin Sherlock. 2015. “Quantitative Evolutionary Dynamics Using  
995 High-Resolution Lineage Tracking.” *Nature* 519 (7542): 181–86.  
996 <https://doi.org/10.1038/nature14279>.
- 997 Li, Rong, and Andrew W. Murray. 1991. “Feedback Control of Mitosis in Budding  
998 Yeast.” *Cell* 66 (3): 519–31. [https://doi.org/10.1016/0092-8674\(81\)90015-5](https://doi.org/10.1016/0092-8674(81)90015-5).
- 999 Lind, Peter A, Andrew D Farr, and Paul B Rainey. 2015. “Experimental Evolution  
1000 Reveals Hidden Diversity in Evolutionary Pathways.” *ELife* 4 (March).  
1001 <https://doi.org/10.7554/eLife.07074>.
- 1002 Liu, Gaowen, Mei Yun Jacy Yong, Marina Yurieva, Kandhadayar Gopalan Srinivasan,  
1003 Jaron Liu, John Soon Yew Lim, Michael Poidinger, et al. 2015. “Gene Essentiality  
1004 Is a Quantitative Property Linked to Cellular Evolvability.” *Cell* 163 (6): 1388–99.  
1005 <https://doi.org/10.1016/j.cell.2015.10.069>.
- 1006 Liu, Yuan, Thomas A Richards, and Stephen J Aves. 2009. “Ancient Diversification of  
1007 Eukaryotic MCM DNA Replication Proteins.” *BMC Evolutionary Biology* 9 (1): 60.  
1008 <https://doi.org/10.1186/1471-2148-9-60>.
- 1009 Lynch, Michael, Way Sung, Krystalynne Morris, Nicole Coffey, Christian R Landry, Erik  
1010 B Dopman, W Joseph Dickinson, et al. 2008. “A Genome-Wide View of the  
1011 Spectrum of Spontaneous Mutations in Yeast.” *Proceedings of the National*  
1012 *Academy of Sciences of the United States of America* 105 (27): 9272–77.  
1013 <https://doi.org/10.1073/pnas.0803466105>.
- 1014 Macheret, Morgane, and Thanos D Halazonetis. 2015. “DNA Replication Stress as a  
1015 Hallmark of Cancer.” *Annual Review of Pathology* 10 (January): 425–48.  
1016 <https://doi.org/10.1146/annurev-pathol-012414-040424>.
- 1017 Mazouzi, Abdelghani, Alexey Stukalov, André C. Müller, Doris Chen, Marc Wiedner,  
1018 Jana Prochazkova, Shih-Chieh Chiang, et al. 2016. “A Comprehensive Analysis of  
1019 the Dynamic Response to Aphidicolin-Mediated Replication Stress Uncovers  
1020 Targets for ATM and ATMIN.” *Cell Reports* 15 (4): 893–908.  
1021 <https://doi.org/10.1016/J.CELREP.2016.03.077>.
- 1022 McGeoch, Adam T, and Stephen D Bell. 2008. “Extra-Chromosomal Elements and the  
1023 Evolution of Cellular DNA Replication Machineries.” *Nature Reviews. Molecular*  
1024 *Cell Biology* 9 (7): 569–74. <https://doi.org/10.1038/nrm2426>.
- 1025 Micco, Raffaella Di, Marzia Fumagalli, Angelo Cicalese, Sara Piccinin, Patrizia

- 1026 Gasparini, Chiara Luise, Catherine Schurra, et al. 2006. "Oncogene-Induced  
1027 Senescence Is a DNA Damage Response Triggered by DNA Hyper-Replication."  
1028 *Nature* 444 (7119): 638–42. <https://doi.org/10.1038/nature05327>.
- 1029 Michaelis, Christine, Rafal Ciosk, and Kim Nasmyth. 1997. "Cohesins: Chromosomal  
1030 Proteins That Prevent Premature Separation of Sister Chromatids." *Cell* 91 (1): 35–  
1031 45. [https://doi.org/10.1016/S0092-8674\(01\)80007-6](https://doi.org/10.1016/S0092-8674(01)80007-6).
- 1032 Miles, J, and T Formosa. 1992. "Evidence That POB1, a *Saccharomyces Cerevisiae*  
1033 Protein That Binds to DNA Polymerase Alpha, Acts in DNA Metabolism in Vivo."  
1034 *Molecular and Cellular Biology* 12 (12): 5724–35.  
1035 <http://www.pubmedcentral.nih.gov/articlerender.fcgi?artid=360512&tool=pmcentrez>  
1036 &rendertype=abstract.
- 1037 Moyer, Stephen E, Peter W Lewis, and Michael R Botchan. 2006. "Isolation of the  
1038 Cdc45/Mcm2-7/GINS (CMG) Complex, a Candidate for the Eukaryotic DNA  
1039 Replication Fork Helicase." *Proceedings of the National Academy of Sciences of*  
1040 *the United States of America* 103 (27): 10236–41.  
1041 <https://doi.org/10.1073/pnas.0602400103>.
- 1042 Müller, Carolin A., Michelle Hawkins, Renata Retkute, Sunir Malla, Ray Wilson, Martin  
1043 J. Blythe, Ryuichiro Nakato, et al. 2014. "The Dynamics of Genome Replication  
1044 Using Deep Sequencing." *Nucleic Acids Research* 42 (1): e3–e3.  
1045 <https://doi.org/10.1093/nar/gkt878>.
- 1046 Muñoz, Sergio, and Juan Méndez. 2016. "DNA Replication Stress: From Molecular  
1047 Mechanisms to Human Disease." *Chromosoma*, January, 1–15.  
1048 <https://doi.org/10.1007/s00412-016-0573-x>.
- 1049 Murray, A. 1994. "Cell Cycle Checkpoints." *Current Opinion in Cell Biology* 6 (6): 872–  
1050 76. [https://doi.org/10.1016/0955-0674\(94\)90059-0](https://doi.org/10.1016/0955-0674(94)90059-0).
- 1051 Murray, a W. 1992. "Creative Blocks: Cell-Cycle Checkpoints and Feedback Controls."  
1052 *Nature* 359 (6396): 599–604. <https://doi.org/10.1038/359599a0>.
- 1053 Neelsen, Kai J, Isabella M Y Zanini, Raquel Herrador, and Massimo Lopes. 2013.  
1054 "Oncogenes Induce Genotoxic Stress by Mitotic Processing of Unusual Replication  
1055 Intermediates." *The Journal of Cell Biology* 200 (6): 699–708.  
1056 <https://doi.org/10.1083/jcb.201212058>.
- 1057 O'Donnell, Michael, Lance Langston, and Bruce Stillman. 2013. "Principles and  
1058 Concepts of DNA Replication in Bacteria, Archaea, and Eukarya." *Cold Spring*  
1059 *Harbor Perspectives in Biology* 5 (7): a010108-  
1060 <https://doi.org/10.1101/cshperspect.a010108>.
- 1061 Pai, Chen-Chun, and Stephen E Kearsey. 2017. "A Critical Balance: DNTPs and the  
1062 Maintenance of Genome Stability." *Genes* 8 (2).  
1063 <https://doi.org/10.3390/genes8020057>.
- 1064 Pardo, Benjamin, Laure Crabbé, and Philippe Pasero. 2017. "Signaling Pathways of  
1065 Replication Stress in Yeast." *FEMS Yeast Research* 17 (2): 1–11.

- 1066 <https://doi.org/10.1093/femsyr/fow101>.
- 1067 Parker, Matthew W., Michael R. Botchan, and James M. Berger. 2017. "Mechanisms  
1068 and Regulation of DNA Replication Initiation in Eukaryotes." *Critical Reviews in*  
1069 *Biochemistry and Molecular Biology* 52 (2): 107–44.  
1070 <https://doi.org/10.1080/10409238.2016.1274717>.
- 1071 Pasero, Philippe, and Alessandro Vindigni. 2017. "Nucleases Acting at Stalled Forks:  
1072 How to Reboot the Replication Program with a Few Shortcuts." *Annual Review of*  
1073 *Genetics* 51 (1): 477–99. <https://doi.org/10.1146/annurev-genet-120116-024745>.
- 1074 Payen, Celia, Sara C Di Rienzi, Giang T Ong, Jamie L Pogachar, Joseph C Sanchez,  
1075 Anna B Sunshine, M K Raghuraman, Bonita J Brewer, and Maitreya J Dunham.  
1076 2014. "The Dynamics of Diverse Segmental Amplifications in Populations of  
1077 *Saccharomyces Cerevisiae* Adapting to Strong Selection." *G3 (Bethesda, Md.)* 4  
1078 (3): 399–409. <https://doi.org/10.1534/g3.113.009365>.
- 1079 Poli, Jérôme, Olga Tsaponina, Laure Crabbé, Andrea Keszthelyi, Véronique Pantesco,  
1080 Andrei Chabes, Armelle Lengronne, et al. 2012. "DNTP Pools Determine Fork  
1081 Progression and Origin Usage under Replication Stress." *The EMBO Journal* 31  
1082 (4): 883–94. <https://doi.org/10.1038/emboj.2011.470>.
- 1083 Raghuraman, M. K., Elizabeth A. Winzeler, David Collingwood, Sonia Hunt, Lisa  
1084 Wodicka, Andrew Conway, David J. Lockhart, Ronald W. Davis, Bonita J. Brewer,  
1085 and Walton L. Fangman. 2001. "Replication Dynamics of the Yeast Genome."  
1086 *Science* 294 (5540): 115–21. <https://doi.org/10.1126/SCIENCE.294.5540.115>.
- 1087 Rancati, Giulia, Jason Moffat, Athanasios Typas, and Norman Pavelka. 2018.  
1088 "Emerging and Evolving Concepts in Gene Essentiality." *Nature Reviews Genetics*  
1089 19 (1): 34–49. <https://doi.org/10.1038/nrg.2017.74>.
- 1090 Rhodes, Jenny M, Miranda McEwan, and Julia A Horsfield. 2011. "Gene Regulation by  
1091 Cohesin in Cancer: Is the Ring an Unexpected Party to Proliferation?" *Molecular*  
1092 *Cancer Research : MCR* 9 (12): 1587–1607. [https://doi.org/10.1158/1541-](https://doi.org/10.1158/1541-7786.MCR-11-0382)  
1093 [7786.MCR-11-0382](https://doi.org/10.1158/1541-7786.MCR-11-0382).
- 1094 Rojas Echenique, José I., Sergey Kryazhimskiy, Alex N. Nguyen Ba, and Michael M.  
1095 Desai. 2019. "Modular Epistasis and the Compensatory Evolution of Gene Deletion  
1096 Mutants." Edited by Geraldine Butler. *PLOS Genetics* 15 (2): e1007958.  
1097 <https://doi.org/10.1371/journal.pgen.1007958>.
- 1098 Saayman, Xanita, Cristina Ramos-Pérez, and Grant W. Brown. 2018. "DNA Replication  
1099 Profiling Using Deep Sequencing." In *Methods Mol Biol.*, 195–207.  
1100 [https://doi.org/10.1007/978-1-4939-7306-4\\_15](https://doi.org/10.1007/978-1-4939-7306-4_15).
- 1101 Samora, Catarina P., Julie Saksouk, Panchali Goswami, Ben O. Wade, Martin R.  
1102 Singleton, Paul A. Bates, Armelle Lengronne, et al. 2016. "Ctf4 Links DNA  
1103 Replication with Sister Chromatid Cohesion Establishment by Recruiting the Chl1  
1104 Helicase to the Replisome." *Molecular Cell* 0 (0): 121–34.  
1105 <https://doi.org/10.1016/j.molcel.2016.05.036>.



- 1106 Sarogni, Patrizia, Orazio Palumbo, Adele Servadio, Simonetta Astigiano, Barbara  
1107 D'Alessio, Veronica Gatti, Dubravka Cukrov, et al. 2019. "Overexpression of the  
1108 Cohesin-Core Subunit SMC1A Contributes to Colorectal Cancer Development."  
1109 *Journal of Experimental & Clinical Cancer Research* 38 (1): 108.  
1110 <https://doi.org/10.1186/s13046-019-1116-0>.
- 1111 Schultz, L. B., N. H. Chehab, A. Malikzay, Jr Di Tullio, E. S. Stavridi, and T. D.  
1112 Halazonetis. 2000. "The DNA Damage Checkpoint and Human Cancer." *Cold*  
1113 *Spring Harbor Symposia on Quantitative Biology* 65: 489–98.  
1114 <https://doi.org/10.1101/sqb.2000.65.489>.
- 1115 Sharp, Nathaniel P, Linnea Sandell, Christopher G James, and Sarah P Otto. 2018.  
1116 "The Genome-Wide Rate and Spectrum of Spontaneous Mutations Differ between  
1117 Haploid and Diploid Yeast." *Proceedings of the National Academy of Sciences of*  
1118 *the United States of America* 115 (22): E5046–55.  
1119 <https://doi.org/10.1073/pnas.1801040115>.
- 1120 Siddiqui, Khalid, Kin Fan On, and John F X Diffley. 2013. "Regulating DNA Replication  
1121 in Eukarya." *Cold Spring Harbor Perspectives in Biology* 5 (9): a012930.  
1122 <https://doi.org/10.1101/cshperspect.a012930>.
- 1123 Simon, Aline C, Jin C Zhou, Rajika L Perera, Frederick van Deursen, Cecile Evrin,  
1124 Marina E Ivanova, Mairi L Kilkenny, et al. 2014. "A Ctf4 Trimer Couples the CMG  
1125 Helicase to DNA Polymerase Alpha in the Eukaryotic Replisome." *Nature* 510  
1126 (7504): 293–97. <https://doi.org/10.1038/nature13234>.
- 1127 Soulier, Jean, and Noel F. Lowndes. 1999. "The BRCT Domain of the *S. Cerevisiae*  
1128 Checkpoint Protein Rad9 Mediates a Rad9–Rad9 Interaction after DNA Damage."  
1129 *Current Biology*. [https://doi.org/10.1016/S0960-9822\(99\)80242-5](https://doi.org/10.1016/S0960-9822(99)80242-5).
- 1130 Spencer, F., S. L. Gerring, C. Connelly, and P. Hieter. 1990. "Mitotic Chromosome  
1131 Transmission Fidelity Mutants in *Saccharomyces Cerevisiae*." *Genetics* 124: 237–  
1132 49.
- 1133 Steenwyk, Jacob L., Dana A. Oplente, Jacek Kominek, Xing-Xing Shen, Xiaofan Zhou,  
1134 Abigail L. Labella, Noah P. Bradley, et al. 2019. "Extensive Loss of Cell-Cycle and  
1135 DNA Repair Genes in an Ancient Lineage of Bipolar Budding Yeasts." Edited by  
1136 Sophien Kamoun. *PLOS Biology* 17 (5): e3000255.  
1137 <https://doi.org/10.1371/journal.pbio.3000255>.
- 1138 Szamecz, Béla, Gábor Boross, Dorottya Kalapis, Károly Kovács, Gergely Fekete, Zoltán  
1139 Farkas, Viktória Lázár, et al. 2014. "The Genomic Landscape of Compensatory  
1140 Evolution." Edited by Nick H. Barton. *PLoS Biology* 12 (8): e1001935.  
1141 <https://doi.org/10.1371/journal.pbio.1001935>.
- 1142 Tanaka, H, Y Katou, M Yagura, K Saitoh, T Itoh, H Araki, M Bando, and K Shirahige.  
1143 2009. "Ctf4 Coordinates the Progression of Helicase and DNA Polymerase Alpha."  
1144 *Genes to Cells : Devoted to Molecular & Cellular Mechanisms* 14 (7): 807–20.  
1145 <https://doi.org/10.1111/j.1365-2443.2009.01310.x>.
- 1146 Tkach, Johnny M., Askar Yimit, Anna Y. Lee, Michael Riffle, Michael Costanzo, Daniel



- 1147 Jaschob, Jason A. Hendry, et al. 2012. "Dissecting DNA Damage Response  
1148 Pathways by Analysing Protein Localization and Abundance Changes during DNA  
1149 Replication Stress." *Nature Cell Biology* 14 (9): 966–76.  
1150 <https://doi.org/10.1038/ncb2549>.
- 1151 Tsaponina, Olga, Emad Barsoum, Stefan U. Åström, and Andrei Chabes. 2011. "Ixr1 Is  
1152 Required for the Expression of the Ribonucleotide Reductase Rnr1 and  
1153 Maintenance of DNTP Pools." *PLoS Genetics* 7 (5).  
1154 <https://doi.org/10.1371/journal.pgen.1002061>.
- 1155 Venkataram, Sandeep, Barbara Dunn, Yuping Li, Atish Agarwala, Jessica Chang, Emily  
1156 R. Ebel, Kerry Geiler-Samerotte, et al. 2016. "Development of a Comprehensive  
1157 Genotype-to-Fitness Map of Adaptation-Driving Mutations in Yeast." *Cell* 166 (6):  
1158 1585-1596.e22. <https://doi.org/10.1016/J.CELL.2016.08.002>.
- 1159 Villa, Fabrizio, Aline C. Simon, Maria Angeles Ortiz Bazan, Mairi L. Kilkenny, David  
1160 Wirthensohn, Mel Wightman, Dijana Matak-Vinković, et al. 2016. "Ctf4 Is a Hub in  
1161 the Eukaryotic Replisome That Links Multiple CIP-Box Proteins to the CMG  
1162 Helicase." *Molecular Cell* 0 (0): 4601–5.  
1163 <https://doi.org/10.1016/j.molcel.2016.06.009>.
- 1164 Wang, H, D Liu, Y Wang, J Qin, and S J Elledge. 2001. "Pds1 Phosphorylation in  
1165 Response to DNA Damage Is Essential for Its DNA Damage Checkpoint Function."  
1166 *Genes & Development* 15 (11): 1361–72. <https://doi.org/10.1101/gad.893201>.
- 1167 Weinert, TA, and LH Hartwell. 1988. "The RAD9 Gene Controls the Cell Cycle  
1168 Response to DNA Damage in *Saccharomyces Cerevisiae*." *Science* 241 (4863):  
1169 317–22. <https://doi.org/10.1126/science.3291120>.
- 1170 Wildenberg, Gregg A, and Andrew W Murray. 2014. "Evolving a 24-Hr Oscillator in  
1171 Budding Yeast." *ELife* 3 (January): e04875. <https://doi.org/10.7554/eLife.04875>.
- 1172 Wilson, A C, S S Carlson, and T J White. 1977. "Biochemical Evolution." *Annual Review*  
1173 *of Biochemistry* 46 (1): 573–639.  
1174 <https://doi.org/10.1146/annurev.bi.46.070177.003041>.
- 1175 Xu, Huiling, Max Yan, Jennifer Patra, Rachael Natrajan, Yuqian Yan, Sigrid  
1176 Swagemakers, Jonathan M Tomaszewski, et al. 2011. "Enhanced RAD21 Cohesin  
1177 Expression Confers Poor Prognosis and Resistance to Chemotherapy in High  
1178 Grade Luminal, Basal and HER2 Breast Cancers." *Breast Cancer Research* 13 (1):  
1179 R9. <https://doi.org/10.1186/bcr2814>.
- 1180 Yao, Nina, and Mike O'Donnell. 2016. "Bacterial and Eukaryotic Replisome Machines."  
1181 *JSM Biochemistry and Molecular Biology* 3 (1): 1–7.  
1182 <http://www.ncbi.nlm.nih.gov/pubmed/28042596>  
1183 <http://www.pubmedcentral.nih.gov/articlerender.fcgi?artid=PMC5199024>.
- 1184 Yona, Avihu H, Idan Frumkin, and Yitzhak Pilpel. 2015. "A Relay Race on the  
1185 Evolutionary Adaptation Spectrum." *Cell* 163 (3): 549–59.  
1186 <https://doi.org/10.1016/j.cell.2015.10.005>.

- 1187 Zegerman, Philip, and John F. X. Diffley. 2010. "Checkpoint-Dependent Inhibition of  
1188 DNA Replication Initiation by Sld3 and Dbf4 Phosphorylation." *Nature* 467 (7314):  
1189 474–78. <https://doi.org/10.1038/nature09373>.
- 1190 Zegerman, Philip, and John F X Diffley. 2009. "DNA Replication as a Target of the DNA  
1191 Damage Checkpoint." *DNA Repair* 8 (9): 1077–88.  
1192 <https://doi.org/10.1016/j.dnarep.2009.04.023>.
- 1193 Zeman, Michelle K., and Karlene A. Cimprich. 2014. "Causes and Consequences of  
1194 Replication Stress." *Nature Cell Biology* 16 (1): 2–9.  
1195 <https://doi.org/10.1038/ncb2897>.
- 1196 Zheng, Dao-Qiong, Ke Zhang, Xue-Chang Wu, Piotr A Mieczkowski, and Thomas D  
1197 Petes. 2016. "Global Analysis of Genomic Instability Caused by DNA Replication  
1198 Stress in *Saccharomyces Cerevisiae*." *Proceedings of the National Academy of  
1199 Sciences of the United States of America*, November, 201618129.  
1200 <https://doi.org/10.1073/pnas.1618129113>.
- 1201
