# Supplementary material for: The evolutionary plasticity of chromosome metabolism allows adaptation to DNA replication stress
Source: bioRxiv preprint, doi:10.1101/770859, version 1 (2019-09-16)
Supplement: Mutations list [file 770859_file03.xlsx]

## Sheet: ctf4D clones
systematic name	sgdid	gene	size	chromosome	position	clone	type	reference nt	clone nt	fraction	reads	mutation effect	description
YNL141W	S000005085	AAH1	1044	14	359387	EVO1_3_	snp	G	T	100	4	Clone variant, promoter	Adenine deaminase (adenine aminohydrolase); converts adenine to hypoxanthine; involved in purine salvage; transcriptionally regulated by nutrient levels and growth phase; Aah1p degraded upon entry into quiescence via SCF and the proteasome
YNL141W	S000005085	AAH1	1044	14	359387	EVO3_12_	snp	G	T	88	8	Clone variant, promoter	Adenine deaminase (adenine aminohydrolase); converts adenine to hypoxanthine; involved in purine salvage; transcriptionally regulated by nutrient levels and growth phase; Aah1p degraded upon entry into quiescence via SCF and the proteasome
YKL106W	S000001589	AAT1	1356	11	237387	EVO4_2_	snp	C	A	100	17	Clone variant, promoter	Mitochondrial aspartate aminotransferase; catalyzes the conversion of oxaloacetate to aspartate in aspartate and asparagine biosynthesis
YKL106W	S000001589	AAT1	1356	11	237387	EVO4_5_	snp	C	A	100	10	Clone variant, promoter	Mitochondrial aspartate aminotransferase; catalyzes the conversion of oxaloacetate to aspartate in aspartate and asparagine biosynthesis
YMR072W	S000004676	ABF2	552	13	411549	EVO7_7_	snp	C	A	100	13	Clone variant, promoter	Mitochondrial DNA-binding protein; involved in mitochondrial DNA replication and recombination, member of HMG1 DNA-binding protein family; activity may be regulated by protein kinase A phosphorylation; ABF2 has a paralog, IXR1, that arose from the whole genome duplication; human homolog TFAM can complement yeast abf2 mutant, rescuing the loss-of-mitochondrial DNA phenotype in a yeast abf2 strain
YBL015W	S000000111	ACH1	1581	2	195571	EVO7_4_	snp	G	T	100	29	Clone variant, nonsynonymous	Protein with CoA transferase activity; particularly for CoASH transfer from succinyl-CoA to acetate; has minor acetyl-CoA-hydrolase activity; phosphorylated; required for acetate utilization and for diploid pseudohyphal growth
YGR061C	S000003293	ADE6	4077	7	613042	EVO4_5_	snp	C	T	100	12	Clone variant, nonsynonymous	Formylglycinamidine-ribonucleotide (FGAM)-synthetase; catalyzes a step in the 'de novo' purine nucleotide biosynthetic pathway
Q0050	S000007261	AI1	2505	17	16150	EVO6_1_	snp	T	A	100	153	Clone variant, synonoymous	Reverse transcriptase required for splicing of the COX1 pre-mRNA; encoded by a mobile group II intron within the mitochondrial COX1 gene
Q0050	S000007261	AI1	2505	17	16150	EVO6_3_	snp	T	A	100	229	Clone variant, synonoymous	Reverse transcriptase required for splicing of the COX1 pre-mRNA; encoded by a mobile group II intron within the mitochondrial COX1 gene
Q0050	S000007261	AI1	2505	17	16150	EVO6_5_	snp	T	A	100	86	Clone variant, synonoymous	Reverse transcriptase required for splicing of the COX1 pre-mRNA; encoded by a mobile group II intron within the mitochondrial COX1 gene
Q0050	S000007261	AI1	2505	17	16150	EVO6_7_	snp	T	A	100	202	Clone variant, synonoymous	Reverse transcriptase required for splicing of the COX1 pre-mRNA; encoded by a mobile group II intron within the mitochondrial COX1 gene
YER087W	S000000889	AIM10	1731	5	331031	EVO4_3_	snp	G	A	100	12	Clone variant, nonsynonymous	Protein with similarity to tRNA synthetases; non-tagged protein is detected in purified mitochondria; null mutant is viable and displays elevated frequency of mitochondrial genome loss
YML087C	S000004552	AIM33	939	13	95227	EVO4_3_	snp	G	A	100	23	Clone variant, synonoymous	Protein of unknown function, highly conserved across species; homolog of human CYB5R4; null mutant displays reduced frequency of mitochondrial genome loss; AIM33 has a paralog, PGA3, that arose from the whole genome duplication
YNL100W	S000005044	AIM37	705	14	437156	EVO2_10_	snp	C	T	100	21	Clone variant, promoter	Component of the MICOS complex; MICOS (formerly MINOS or MitOS) is a mitochondrial inner membrane complex that extends into the intermembrane space and has a role in the maintenance of crista junctions, inner membrane architecture, and formation of contact sites to the outer membrane; forms a subcomplex with Mic10p and Mic12p whose assembly and stability requires cardiolipin
YBR059C	S000000263	AKL1	3327	2	357010	EVO4_3_	snp	T	G	100	18	Clone variant, synonoymous	Ser/Thr protein kinase; phosphorylates Pan1p, Sla1p and Ent1p to negatively regulate endocytosis in response to membrane stress; regulates actin cytoskeleton organization and clathrin-dependent endocytosis; phosphorylated and inhibited by upstream kinase, Fpk1p; member, along with Ark1p and Prk1p, of the Ark kinase family
YMR169C	S000004779	ALD3	1521	13	600630	EVO7_6_	snp	T	A	100	7	Clone variant, nonsynonymous	Cytoplasmic aldehyde dehydrogenase; involved in beta-alanine synthesis; uses NAD+ as the preferred coenzyme; very similar to Ald2p; expression is induced by stress and repressed by glucose
YGL021W	S000002989	ALK1	2283	7	456519	EVO2_10_	indel	T	-G	100	13	Clone variant, nonsynonymous	Protein kinase; along with its paralog, ALK2, required for proper spindle positioning and nuclear segregation following mitotic arrest, proper organization of cell polarity factors in mitosis, proper localization of formins and polarity factors, and survival in cells that activate spindle assembly checkpoint; phosphorylated in response to DNA damage; ALK1 has a paralog, ALK2, that arose from the …
YLR089C	S000004079	ALT1	1779	12	320334	EVO6_1_	indel	G	-A	100	2	Clone variant, promoter	Alanine transaminase (glutamic pyruvic transaminase); involved in alanine biosynthesis and catabolism; TOR1-independent role in determining chronological lifespan; expression is induced in the presence of alanine; repression is mediated by Nrg1p; ALT1 has a paralog, ALT2, that arose from the whole genome duplication; Alt2p is catalytically inactive
YPR029C	S000006233	APL4	2499	16	627551	EVO3_12_	snp	G	A	96	25	Clone variant, promoter	Gamma-adaptin; large subunit of the clathrin-associated protein (AP-1) complex; binds clathrin; involved in vesicle mediated transport
YLR170C	S000004160	APS1	471	12	501308	EVO4_2_	snp	A	C	100	20	Clone variant, promoter	Small subunit of the clathrin-associated adaptor complex AP-1; AP-1 is involved in protein sorting at the trans-Golgi network; homolog of the sigma subunit of the mammalian clathrin AP-1 complex
YLR170C	S000004160	APS1	471	12	501308	EVO4_3_	snp	A	C	100	13	Clone variant, promoter	Small subunit of the clathrin-associated adaptor complex AP-1; AP-1 is involved in protein sorting at the trans-Golgi network; homolog of the sigma subunit of the mammalian clathrin AP-1 complex
YLR170C	S000004160	APS1	471	12	501308	EVO4_5_	snp	A	C	100	9	Clone variant, promoter	Small subunit of the clathrin-associated adaptor complex AP-1; AP-1 is involved in protein sorting at the trans-Golgi network; homolog of the sigma subunit of the mammalian clathrin AP-1 complex
YLR170C	S000004160	APS1	471	12	501308	EVO4_9_	snp	A	C	100	17	Clone variant, promoter	Small subunit of the clathrin-associated adaptor complex AP-1; AP-1 is involved in protein sorting at the trans-Golgi network; homolog of the sigma subunit of the mammalian clathrin AP-1 complex
YGL148W	S000003116	ARO2	1131	7	226935	EVO5_5_	snp	A	C	100	12	Clone variant, nonsynonymous	Bifunctional chorismate synthase and flavin reductase; catalyzes the conversion of 5-enolpyruvylshikimate 3-phosphate (EPSP) to form chorismate, which is a precursor to aromatic amino acids; protein abundance increases in response to DNA replication stress
YDR106W	S000002513	ARP10	855	4	667696	EVO1_9_	snp	A	G	100	7	Clone variant, nonsynonymous	Component of the dynactin complex; localized to the pointed end of the Arp1p filament; may regulate membrane association of the complex
YMR119W	S000004725	ASI1	1875	13	506583	EVO3_1_	snp	G	C	100	8	Clone variant, nonsynonymous	Subunit of the inner nuclear membrane Asi ubiquitin ligase complex; the Asi complex targets both misfolded proteins of the inner nuclear membrane-associated degradation (INMAD) pathway and regulators of sterol biosynthesis for ubiquitin-mediated degradation; acts with Asi2p and Asi3p to ensure the fidelity of SPS-sensor signaling by targeting latent unprocessed forms of Stp1p and Stp2p, maintaini…
YDR321W	S000002729	ASP1	1146	4	1108364	EVO3_1_	snp	T	G	92	12	Clone variant, promoter	Cytosolic L-asparaginase, involved in asparagine catabolism; catalyzes hydrolysis of L-asparagine to aspartic acid and ammonia; important enzyme for the treatment of acute lymphoblastic leukemia; has low glutaminase activity and dependence; synthesized constitutively
YDL149W	S000002308	ATG9	2994	4	187707	EVO3_1_	snp	T	C	100	23	Clone variant, synonoymous	Transmembrane protein involved in forming Cvt and autophagic vesicles; cycles between the phagophore assembly site (PAS) and other cytosolic punctate structures, not found in autophagosomes; may be involved in membrane delivery to the PAS
Q0085	S000007268	ATP6	780	17	29280	EVO8_5_	snp	T	A	100	4	Clone variant, other	Subunit a of the F0 sector of mitochondrial F1F0 ATP synthase; mitochondrially encoded; translation is specifically activated by Atp22p; ATP6 and ATP8 mRNAs are not translated in the absence of the F1 sector of ATPase; mutations in human ortholog MT-ATP6 are associated with neurodegenerative disorders such as Neurogenic Ataxia and Retinitis Pigmentosa (NARP), Leigh syndrome (LS), Charcot-Marie-To…
YNL101W	S000005045	AVT4	2142	14	437156	EVO2_10_	snp	C	T	100	21	Clone variant, other	Vacuolar transporter; exports large neutral amino acids from the vacuole; member of a family of seven S. cerevisiae genes (AVT1-7) related to vesicular GABA-glycine transporters; localizes to sites of contact between the vacuole and mitochondria (vCLAMPs)
YJL020C	S000003557	BBC1	3474	10	398810	EVO6_3_	snp	T	A	100	5	Clone variant, other	Protein possibly involved in assembly of actin patches; interacts with an actin assembly factor Las17p and with the SH3 domains of Type I myosins Myo3p and Myo5p; localized predominantly to cortical actin patches
YCR032W	S000000628	BPH1	6504	3	180161	EVO6_7_	snp	C	T	100	10	Clone variant, nonsynonymous	Protein homologous to Chediak-Higashi syndrome and Beige proteins; both of which are implicated in disease syndromes in human and mouse, respectively, due to defective lysosomal trafficking; mutant phenotype and genetic interactions suggest a role in protein sorting
YDL231C	S000002390	BRE4	3378	4	41571	EVO1_3_	snp	G	A	100	34	Clone variant, nonsynonymous	Zinc finger protein containing five transmembrane domains; null mutant exhibits strongly fragmented vacuoles and sensitivity to brefeldin A, a drug which is known to affect intracellular transport
YDL231C	S000002390	BRE4	3378	4	42829	EVO8_7_	indel	T	+G	98	47	Clone variant, promoter	Zinc finger protein containing five transmembrane domains; null mutant exhibits strongly fragmented vacuoles and sensitivity to brefeldin A, a drug which is known to affect intracellular transport
YFL025C	S000001869	BST1	3090	6	87977	EVO5_11_	indel	C	+TTGCTGCTGTTGTTGCTGCTGTTGTTGTTG	100	5	Clone variant, promoter	GPI inositol deacylase of the endoplasmic reticulum (ER); negatively regulates COPII vesicle formation; prevents production of vesicles with defective subunits; required for proper discrimination between resident ER proteins and Golgi-bound cargo molecules; functional ortholog of human PGAP1, mutation of which is associated with intellectual disability and encephalopathy
YFL025C	S000001869	BST1	3090	6	87977	EVO5_3_	indel	C	+TTGCTGCTGTTGTTGCTGCTGTTGTTGTTG	82	11	Clone variant, promoter	GPI inositol deacylase of the endoplasmic reticulum (ER); negatively regulates COPII vesicle formation; prevents production of vesicles with defective subunits; required for proper discrimination between resident ER proteins and Golgi-bound cargo molecules; functional ortholog of human PGAP1, mutation of which is associated with intellectual disability and encephalopathy
YFL025C	S000001869	BST1	3090	6	87977	EVO5_5_	indel	C	+TTGCTGCTGTTGTTGCTGCTGTTGTTGTTG	82	11	Clone variant, promoter	GPI inositol deacylase of the endoplasmic reticulum (ER); negatively regulates COPII vesicle formation; prevents production of vesicles with defective subunits; required for proper discrimination between resident ER proteins and Golgi-bound cargo molecules; functional ortholog of human PGAP1, mutation of which is associated with intellectual disability and encephalopathy
YFL025C	S000001869	BST1	3090	6	87977	EVO7_4_	indel	C	+TTGCTGCTGTTGTTGCTGCTGTTGTTGTTG	85	13	Clone variant, promoter	GPI inositol deacylase of the endoplasmic reticulum (ER); negatively regulates COPII vesicle formation; prevents production of vesicles with defective subunits; required for proper discrimination between resident ER proteins and Golgi-bound cargo molecules; functional ortholog of human PGAP1, mutation of which is associated with intellectual disability and encephalopathy
YFL025C	S000001869	BST1	3090	6	87977	EVO7_6_	indel	C	+TTGCTGCTGTTGTTGCTGCTGTTGTTGTTG	90	10	Clone variant, promoter	GPI inositol deacylase of the endoplasmic reticulum (ER); negatively regulates COPII vesicle formation; prevents production of vesicles with defective subunits; required for proper discrimination between resident ER proteins and Golgi-bound cargo molecules; functional ortholog of human PGAP1, mutation of which is associated with intellectual disability and encephalopathy
YFL025C	S000001869	BST1	3090	6	87977	EVO7_9_	indel	C	+TTGCTGCTGTTGTTGCTGCTGTTGTTGTTG	76	21	Clone variant, promoter	GPI inositol deacylase of the endoplasmic reticulum (ER); negatively regulates COPII vesicle formation; prevents production of vesicles with defective subunits; required for proper discrimination between resident ER proteins and Golgi-bound cargo molecules; functional ortholog of human PGAP1, mutation of which is associated with intellectual disability and encephalopathy
YFL025C	S000001869	BST1	3090	6	87977	EVO8_5_	indel	C	+TTGCTGCTGTTGTTGCTGCTGTTGTTGTTG	87	15	Clone variant, promoter	GPI inositol deacylase of the endoplasmic reticulum (ER); negatively regulates COPII vesicle formation; prevents production of vesicles with defective subunits; required for proper discrimination between resident ER proteins and Golgi-bound cargo molecules; functional ortholog of human PGAP1, mutation of which is associated with intellectual disability and encephalopathy
YFL025C	S000001869	BST1	3090	6	87977	EVO8_9_	indel	C	+TTGCTGCTGTTGTTGCTGCTGTTGTTGTTG	100	6	Clone variant, promoter	GPI inositol deacylase of the endoplasmic reticulum (ER); negatively regulates COPII vesicle formation; prevents production of vesicles with defective subunits; required for proper discrimination between resident ER proteins and Golgi-bound cargo molecules; functional ortholog of human PGAP1, mutation of which is associated with intellectual disability and encephalopathy
YLR074C	S000004064	BUD20	501	12	282683	EVO8_9_	indel	A	-T	91	11	Clone variant, promoter	C2H2-type zinc finger protein required for ribosome assembly; shuttling factor which associates with pre-60S particles in the nucleus, accompanying them to the cytoplasm; cytoplasmic dissociation of Bud20p requires Drg1p; N-terminus harbors a nuclear localization signal (NLS) and a nuclear export signal (NES); cytoplasmic Bud20p is reimported by Kap123-dependent pathway; involved in bud-site sele…
YFL023W	S000001871	BUD27	2391	6	90830	EVO5_4_	snp	A	C	100	37	Clone variant, promoter	Unconventional prefoldin protein involved in translation initiation; required for correct assembly of RNAP I, II, and III in an Rpb5p-dependent manner; shuttles between nucleus and cytoplasm; mutants have inappropriate expression of nutrient sensitive genes due to translational derepression of Gcn4p transcription factor; diploid mutants show random budding; ortholog of human URI/RMP
YML111W	S000004579	BUL2	2763	13	49836	EVO3_1_	indel	C	+TTT	100	3	Clone variant, other	Component of the Rsp5p E3-ubiquitin ligase complex; involved in intracellular amino acid permease sorting, functions in heat shock element mediated gene expression, essential for growth in stress conditions; BUL2 has a paralog, BUL1, that arose from the whole genome duplication
YLR438W	S000004430	CAR2	1275	12	1012643	EVO5_3_	snp	C	G	100	12	Clone variant, nonsynonymous	L-ornithine transaminase (OTAse); catalyzes the second step of arginine degradation, expression is dually-regulated by allophanate induction and a specific arginine induction process; not nitrogen catabolite repression sensitive; protein abundance increases in response to DNA replication stress; human homolog OAT complements yeast null mutant
YLR175W	S000004165	CBF5	1452	12	506101	EVO6_1_	snp	G	T	100	4	Clone variant, promoter	Pseudouridine synthase catalytic subunit of box H/ACA snoRNPs; acts on large and small rRNAs, on snRNA U2, and on some mRNAs; mutations in human ortholog dyskerin cause the disorder dyskeratosis congenita; small nucleolar ribonucleoprotein particles are also known as snoRNPs
YKR066C	S000001774	CCP1	1086	11	565967	EVO5_5_	snp	G	A	100	14	Clone variant, other	Mitochondrial cytochrome-c peroxidase; degrades reactive oxygen species in mitochondria, involved in the response to oxidative stress
YLR245C	S000004235	CDD1	429	12	626433	EVO4_2_	indel	G	+AAAA	100	3	Clone variant, other	Cytidine deaminase; catalyzes the modification of cytidine to uridine in vitro but native RNA substrates have not been identified, localizes to both the nucleus and cytoplasm
YBR029C	S000000233	CDS1	1374	2	297010	EVO1_12_	snp	T	C	100	20	Clone variant, synonoymous	Phosphatidate cytidylyltransferase (CDP-diglyceride synthetase); an enzyme that catalyzes that conversion of CTP + phosphate into diphosphate + CDP-diaclglyerol, a critical step in the synthesis of all major yeast phospholipids; human homolog CDS1 can complement yeast cds1 null mutant
YPL008W	S000005929	CHL1	2586	16	541433	EVO3_12_	snp	G	A	100	17	Clone variant, nonsynonymous	Probable DNA helicase; involved in sister-chromatid cohesion and genome integrity and interstrand cross-link repair; interacts with ECO1 and CTF18; mutants are defective in silencing, rDNA recombination, aging and the heat shock response; FANCJ-like helicase family member; mutations in the human homolog, DDX11/ChLR1, cause Warsaw breakage syndrome
YPL008W	S000005929	CHL1	2586	16	541433	EVO3_9_	snp	G	A	100	20	Clone variant, nonsynonymous	Probable DNA helicase; involved in sister-chromatid cohesion and genome integrity and interstrand cross-link repair; interacts with ECO1 and CTF18; mutants are defective in silencing, rDNA recombination, aging and the heat shock response; FANCJ-like helicase family member; mutations in the human homolog, DDX11/ChLR1, cause Warsaw breakage syndrome
YLR330W	S000004322	CHS5	2016	12	788491	EVO3_9_	snp	G	C	100	24	Clone variant, nonsynonymous	Component of the exomer complex; the exomer which also contains Csh6p, Bch1p, Bch2p, and Bud7, is involved in the export of select proteins, such as chitin synthase Chs3p, from the Golgi to the plasma membrane; interacts selectively with the activated, GTP-bound form of Arf1p; Chs5p is the only protein with a BRCT domain that is not localized to the nucleus
YER030W	S000000832	CHZ1	462	5	213922	EVO8_9_	snp	C	T	100	13	Clone variant, other	Histone chaperone for Htz1p/H2A-H2B dimer; required for the stabilization of the Chz1p-Htz1-H2B complex; has overlapping function with Nap1p; null mutant displays weak sensitivity to MMS and benomyl; contains a highly conserved CHZ motif; protein abundance increases in response to DNA replication stress
YML110C	S000004578	COQ5	924	13	49836	EVO3_1_	indel	C	+TTT	100	3	Clone variant, other	2-hexaprenyl-6-methoxy-1,4-benzoquinone methyltransferase; involved in ubiquinone (Coenzyme Q) biosynthesis; localizes to the matrix face of the mitochondrial inner membrane in a large complex with other ubiquinone biosynthetic enzymes; respiratory defect of the null mutant is partially complemented by human COQ5
YPL172C	S000006093	COX10	1389	16	226046	EVO7_9_	snp	C	A	100	13	Clone variant, promoter	Heme A:farnesyltransferase; catalyzes first step in conversion of protoheme to heme A prosthetic group required for cytochrome c oxidase activity; human ortholog COX10 can complement yeast cox10 null mutant; human ortholog COX10 is associated with mitochondrial disorders
YER141W	S000000943	COX15	1461	5	453407	EVO7_9_	snp	A	G	100	43	Clone variant, promoter	Heme a synthase; required for the hydroxylation of heme O to form heme A, an essential prosthetic group for cytochrome c oxidase; oligomerization is required for function
YLR087C	S000004077	CSF1	8877	12	307667	EVO1_9_	snp	C	G	100	13	Clone variant, nonsynonymous	Protein required for fermentation at low temperature; plays a role in the maturation of secretory proteins; the authentic, non-tagged protein is detected in highly purified mitochondria in high-throughput studies
YIL132C	S000001394	CSM2	642	9	99817	EVO3_9_	snp	G	A	100	39	Clone variant, other	Component of Shu complex (aka PCSS complex); Shu complex also includes Psy3, Shu1, Shu2, and promotes error-free DNA repair,; Shu complex mediates inhibition of Srs2p function; promotes formation of Rad51p filaments; Psy3p and Csm2p contain similar DNA-binding regions which work together to form a single DNA binding site; required for accurate chromosome segregation during meiosis
YMR048W	S000004651	CSM3	954	13	367349	EVO2_10_	snp	G	C	100	13	Clone variant, nonsynonymous	Replication fork associated factor; required for stable replication fork pausing; component of the DNA replication checkpoint pathway; required for accurate chromosome segregation during meiosis; forms nuclear foci upon DNA replication stress
YPR030W	S000006234	CSR2	3366	16	627551	EVO3_12_	snp	G	A	96	25	Clone variant, promoter	Nuclear ubiquitin protein ligase binding protein; may regulate utilization of nonfermentable carbon sources and endocytosis of plasma membrane proteins; overproduction suppresses chs5 spa2 lethality at high temp; ubiquitinated by Rsp5p, deubiquitinated by Ubp2p; CSR2 has a paralog, ECM21, that arose from the whole genome duplication
YDR151C	S000002558	CTH1	978	4	765151	EVO5_11_	snp	T	C	100	17	Clone variant, nonsynonymous	Member of the CCCH zinc finger family; similar to mammalian Tis11 protein, which activates transcription and also has a role in mRNA degradation; may function with Tis11p in iron homeostasis; CTH1 has a paralog, TIS11, that arose from the whole genome duplication
YOL145C	S000005505	CTR9	3234	15	49431	EVO2_1_	snp	G	A	100	17	Clone variant, other	Component of the Paf1p complex involved in transcription elongation; binds to and modulates the activity of RNA polymerases I and II; required for expression of a subset of genes, including cyclin genes; involved in SER3 repression by helping to maintain SRG1 transcription-dependent nucleosome occupancy; contains TPR repeats
YOL145C	S000005505	CTR9	3234	15	49431	EVO2_10_	snp	G	A	100	15	Clone variant, other	Component of the Paf1p complex involved in transcription elongation; binds to and modulates the activity of RNA polymerases I and II; required for expression of a subset of genes, including cyclin genes; involved in SER3 repression by helping to maintain SRG1 transcription-dependent nucleosome occupancy; contains TPR repeats
YOL145C	S000005505	CTR9	3234	15	49431	EVO2_2_	snp	G	A	100	12	Clone variant, other	Component of the Paf1p complex involved in transcription elongation; binds to and modulates the activity of RNA polymerases I and II; required for expression of a subset of genes, including cyclin genes; involved in SER3 repression by helping to maintain SRG1 transcription-dependent nucleosome occupancy; contains TPR repeats
YOL145C	S000005505	CTR9	3234	15	49431	EVO2_3_	snp	G	A	100	14	Clone variant, other	Component of the Paf1p complex involved in transcription elongation; binds to and modulates the activity of RNA polymerases I and II; required for expression of a subset of genes, including cyclin genes; involved in SER3 repression by helping to maintain SRG1 transcription-dependent nucleosome occupancy; contains TPR repeats
YOL145C	S000005505	CTR9	3234	15	50566	EVO7_4_	snp	T	G	100	23	Clone variant, nonsynonymous	Component of the Paf1p complex involved in transcription elongation; binds to and modulates the activity of RNA polymerases I and II; required for expression of a subset of genes, including cyclin genes; involved in SER3 repression by helping to maintain SRG1 transcription-dependent nucleosome occupancy; contains TPR repeats
YOL145C	S000005505	CTR9	3234	15	50566	EVO7_6_	snp	T	G	100	16	Clone variant, nonsynonymous	Component of the Paf1p complex involved in transcription elongation; binds to and modulates the activity of RNA polymerases I and II; required for expression of a subset of genes, including cyclin genes; involved in SER3 repression by helping to maintain SRG1 transcription-dependent nucleosome occupancy; contains TPR repeats
YOL145C	S000005505	CTR9	3234	15	50566	EVO7_7_	snp	T	G	100	15	Clone variant, nonsynonymous	Component of the Paf1p complex involved in transcription elongation; binds to and modulates the activity of RNA polymerases I and II; required for expression of a subset of genes, including cyclin genes; involved in SER3 repression by helping to maintain SRG1 transcription-dependent nucleosome occupancy; contains TPR repeats
YOL145C	S000005505	CTR9	3234	15	50566	EVO7_9_	snp	T	G	100	34	Clone variant, nonsynonymous	Component of the Paf1p complex involved in transcription elongation; binds to and modulates the activity of RNA polymerases I and II; required for expression of a subset of genes, including cyclin genes; involved in SER3 repression by helping to maintain SRG1 transcription-dependent nucleosome occupancy; contains TPR repeats
YGL166W	S000003134	CUP2	678	7	191694	EVO4_2_	snp	C	T	100	24	Clone variant, synonoymous	Copper-binding transcription factor; activates transcription of the metallothionein genes CUP1-1 and CUP1-2 in response to elevated copper concentrations; required for regulation of copper genes in response to DNA-damaging reagents; CUP2 has a paralog, HAA1, that arose from the whole genome duplication
YGL166W	S000003134	CUP2	678	7	191694	EVO4_5_	snp	C	T	100	16	Clone variant, synonoymous	Copper-binding transcription factor; activates transcription of the metallothionein genes CUP1-1 and CUP1-2 in response to elevated copper concentrations; required for regulation of copper genes in response to DNA-damaging reagents; CUP2 has a paralog, HAA1, that arose from the whole genome duplication
YDR320C-A	S000007604	DAD4	219	4	1108364	EVO3_1_	snp	T	G	92	12	Clone variant, nonsynonymous	Essential subunit of the Dam1 complex (aka DASH complex); complex couples kinetochores to the force produced by MT depolymerization thereby aiding in chromosome segregation; is transferred to the kinetochore prior to mitosis
YDL031W	S000002189	DBP10	2988	4	396008	EVO8_10_	snp	G	A	100	24	Clone variant, nonsynonymous	Putative ATP-dependent RNA helicase of the DEAD-box protein family; constituent of 66S pre-ribosomal particles; essential protein involved in ribosome biogenesis
YLR437C	S000004429	DIF1	402	12	1012643	EVO5_3_	snp	C	G	100	12	Clone variant, promoter	Protein that regulates nuclear localization of Rnr2p and Rnr4p; phosphorylated by Dun1p in response to DNA damage and degraded; N-terminal half shows similarity to S. pombe Spd1 protein; DIF1 has a paralog, SML1, that arose from the whole genome duplication
YOL021C	S000005381	DIS3	3006	15	284045	EVO3_8_	snp	T	G	100	17	Clone variant, nonsynonymous	Exosome core complex catalytic subunit; has both endonuclease and 3'-5' exonuclease activity; involved in 3'-5' RNA processing and degradation in both the nucleus and the cytoplasm; role in degradation of tRNAs; similar to E. coli RNase R and to human DIS3, which partially complements dis3-81 heat sensitivity; mutations in Dis3p analogous to human mutations implicated in multiple myeloma impair e…
YDR141C	S000002548	DOP1	5097	4	734753	EVO3_1_	snp	C	G	100	10	Clone variant, other	Golgi-localized, leucine-zipper domain containing protein; involved in endosome to Golgi transport, organization of the ER, establishing cell polarity, and morphogenesis; detected in highly purified mitochondria in high-throughput studies
YDR141C	S000002548	DOP1	5097	4	734753	EVO3_12_	snp	C	G	100	28	Clone variant, other	Golgi-localized, leucine-zipper domain containing protein; involved in endosome to Golgi transport, organization of the ER, establishing cell polarity, and morphogenesis; detected in highly purified mitochondria in high-throughput studies
YDR141C	S000002548	DOP1	5097	4	734753	EVO3_9_	snp	C	G	100	27	Clone variant, other	Golgi-localized, leucine-zipper domain containing protein; involved in endosome to Golgi transport, organization of the ER, establishing cell polarity, and morphogenesis; detected in highly purified mitochondria in high-throughput studies
YJL090C	S000003626	DPB11	2295	10	263247	EVO3_1_	indel	G	+T	100	5	Clone variant, nonsynonymous	DNA replication initiation protein; loads DNA pol epsilon onto pre-replication complexes at origins; checkpoint sensor recruited to stalled replication forks by the checkpoint clamp complex where it activates Mec1p; along with Rfa1p, binds to ultrafine anaphase bridges in mitotic cells and prevents accumulation of chromatin bridges by stimulating the Mec1p kinase and suppressing homologous recomb…
YJL090C	S000003626	DPB11	2295	10	263247	EVO3_12_	indel	G	+T	85	26	Clone variant, nonsynonymous	DNA replication initiation protein; loads DNA pol epsilon onto pre-replication complexes at origins; checkpoint sensor recruited to stalled replication forks by the checkpoint clamp complex where it activates Mec1p; along with Rfa1p, binds to ultrafine anaphase bridges in mitotic cells and prevents accumulation of chromatin bridges by stimulating the Mec1p kinase and suppressing homologous recomb…
YJL090C	S000003626	DPB11	2295	10	263247	EVO3_8_	indel	G	+T	86	7	Clone variant, nonsynonymous	DNA replication initiation protein; loads DNA pol epsilon onto pre-replication complexes at origins; checkpoint sensor recruited to stalled replication forks by the checkpoint clamp complex where it activates Mec1p; along with Rfa1p, binds to ultrafine anaphase bridges in mitotic cells and prevents accumulation of chromatin bridges by stimulating the Mec1p kinase and suppressing homologous recomb…
YJL090C	S000003626	DPB11	2295	10	263247	EVO3_9_	indel	G	+T	93	14	Clone variant, nonsynonymous	DNA replication initiation protein; loads DNA pol epsilon onto pre-replication complexes at origins; checkpoint sensor recruited to stalled replication forks by the checkpoint clamp complex where it activates Mec1p; along with Rfa1p, binds to ultrafine anaphase bridges in mitotic cells and prevents accumulation of chromatin bridges by stimulating the Mec1p kinase and suppressing homologous recomb…
YPR175W	S000006379	DPB2	2070	16	889036	EVO6_3_	snp	T	C	100	14	Clone variant, nonsynonymous	Second largest subunit of DNA polymerase II (DNA polymerase epsilon); required for maintenance of fidelity of chromosomal replication; essential motif in C-terminus is required for formation of the four-subunit Pol epsilon; expression peaks at the G1/S phase boundary; Cdc28p substrate
YPR175W	S000006379	DPB2	2070	16	890036	EVO8_10_	snp	C	T	100	16	Clone variant, nonsynonymous	Second largest subunit of DNA polymerase II (DNA polymerase epsilon); required for maintenance of fidelity of chromosomal replication; essential motif in C-terminus is required for formation of the four-subunit Pol epsilon; expression peaks at the G1/S phase boundary; Cdc28p substrate
YLR172C	S000004162	DPH5	903	12	501308	EVO4_2_	snp	A	C	100	20	Clone variant, nonsynonymous	Methyltransferase required for synthesis of diphthamide; diphthamide is a modified histidine residue of translation elongation factor 2 (Eft1p or Eft2p); not essential for viability; GFP-Dph5p fusion protein localizes to the cytoplasm
YLR172C	S000004162	DPH5	903	12	501308	EVO4_3_	snp	A	C	100	13	Clone variant, nonsynonymous	Methyltransferase required for synthesis of diphthamide; diphthamide is a modified histidine residue of translation elongation factor 2 (Eft1p or Eft2p); not essential for viability; GFP-Dph5p fusion protein localizes to the cytoplasm
YLR172C	S000004162	DPH5	903	12	501308	EVO4_5_	snp	A	C	100	9	Clone variant, nonsynonymous	Methyltransferase required for synthesis of diphthamide; diphthamide is a modified histidine residue of translation elongation factor 2 (Eft1p or Eft2p); not essential for viability; GFP-Dph5p fusion protein localizes to the cytoplasm
YLR172C	S000004162	DPH5	903	12	501308	EVO4_9_	snp	A	C	100	17	Clone variant, nonsynonymous	Methyltransferase required for synthesis of diphthamide; diphthamide is a modified histidine residue of translation elongation factor 2 (Eft1p or Eft2p); not essential for viability; GFP-Dph5p fusion protein localizes to the cytoplasm
YNR067C	S000005350	DSE4	3354	14	759591	EVO4_3_	snp	G	T	100	10	Clone variant, promoter	Daughter cell-specific secreted protein with similarity to glucanases; degrades cell wall from the daughter side causing daughter to separate from mother
YBR007C	S000000211	DSF2	2211	2	250243	EVO7_4_	indel	G	-T	100	37	Clone variant, nonsynonymous	Deletion suppressor of mpt5 mutation; relocalizes from bud neck to cytoplasm upon DNA replication stress
YBR007C	S000000211	DSF2	2211	2	250243	EVO7_6_	indel	G	-T	95	19	Clone variant, nonsynonymous	Deletion suppressor of mpt5 mutation; relocalizes from bud neck to cytoplasm upon DNA replication stress
YBR007C	S000000211	DSF2	2211	2	250243	EVO7_7_	indel	G	-T	100	26	Clone variant, nonsynonymous	Deletion suppressor of mpt5 mutation; relocalizes from bud neck to cytoplasm upon DNA replication stress
YBR007C	S000000211	DSF2	2211	2	250243	EVO7_9_	indel	G	-T	94	31	Clone variant, nonsynonymous	Deletion suppressor of mpt5 mutation; relocalizes from bud neck to cytoplasm upon DNA replication stress
YKR054C	S000001762	DYN1	12279	11	542795	EVO8_5_	snp	G	T	100	31	Clone variant, nonsynonymous	Cytoplasmic heavy chain dynein; microtubule motor protein; member of the AAA+ protein family, required for anaphase spindle elongation; involved in spindle assembly, chromosome movement, and spindle orientation during cell division, targeted to microtubule tips by Pac1p; motility along microtubules inhibited by She1p
YKR054C	S000001762	DYN1	12279	11	542795	EVO8_7_	snp	G	T	100	28	Clone variant, nonsynonymous	Cytoplasmic heavy chain dynein; microtubule motor protein; member of the AAA+ protein family, required for anaphase spindle elongation; involved in spindle assembly, chromosome movement, and spindle orientation during cell division, targeted to microtubule tips by Pac1p; motility along microtubules inhibited by She1p
YKR054C	S000001762	DYN1	12279	11	542795	EVO8_9_	snp	G	T	100	5	Clone variant, nonsynonymous	Cytoplasmic heavy chain dynein; microtubule motor protein; member of the AAA+ protein family, required for anaphase spindle elongation; involved in spindle assembly, chromosome movement, and spindle orientation during cell division, targeted to microtubule tips by Pac1p; motility along microtubules inhibited by She1p
YMR171C	S000004781	EAR1	1653	13	605712	EVO5_5_	snp	G	A	100	16	Clone variant, promoter	Specificity factor required for Rsp5p-dependent ubiquitination; also required for sorting of specific cargo proteins at the multivesicular body; mRNA is targeted to the bud via the mRNA transport system involving She2p
YBL101C	S000000197	ECM21	3354	2	25687	EVO4_3_	snp	A	C	100	23	Clone variant, nonsynonymous	Protein involved in regulating endocytosis of plasma membrane proteins; identified as a substrate for ubiquitination by Rsp5p and deubiquitination by Ubp2p; promoter contains several Gcn4p binding elements; ECM21 has a paralog, CSR2, that arose from the whole genome duplication
YJL201W	S000003737	ECM25	1800	10	53900	EVO5_3_	snp	G	T	100	28	Clone variant, promoter	Non-essential protein of unknown function; promoter contains a consensus binding sequence for factor Abf1p
YKR076W	S000001784	ECM4	1113	11	582261	EVO2_10_	snp	C	T	100	28	Clone variant, promoter	S-glutathionyl-(chloro)hydroquinone reductase (GS-HQR); glutathione transferase involved in cell-surface biosynthesis and architecture; catalyzes glutathione (GSH)-dependent reduction of GS-trichloro-p-hydroquinone to trichloro-p-hydroquinone; expression upregulated upon exposure to genotoxic agents, such as methyl methanesulfonate, cisplatin and bleomycin; not an essential gene; similar to YGR15…
YLR443W	S000004435	ECM7	1347	12	1022219	EVO6_1_	snp	C	T	100	5	Clone variant, promoter	Putative integral membrane protein with a role in calcium uptake; non-essential protein; mutant has cell wall defects and Ca+ uptake deficiencies; transcription is induced under conditions of zinc deficiency
YLR443W	S000004435	ECM7	1347	12	1021993	EVO6_3_	snp	C	T	100	14	Clone variant, promoter	Putative integral membrane protein with a role in calcium uptake; non-essential protein; mutant has cell wall defects and Ca+ uptake deficiencies; transcription is induced under conditions of zinc deficiency
YHL039W	S000001031	EFM1	1758	8	21809	EVO4_9_	snp	T	C	100	30	Clone variant, nonsynonymous	Lysine methyltransferase; involved in the monomethylation of eEF1A (Tef1p/Tef2p); SET-domain family member; predicted involvement in ribosome biogenesis; green fluorescent protein (GFP)-fusion protein localizes to the cytoplasm
YLR080W	S000004070	EMP46	1335	12	287387	EVO1_12_	snp	A	C	100	20	Clone variant, promoter	Integral membrane component of ER-derived COPII-coated vesicles; functions in ER to Golgi transport; EMP46 has a paralog, EMP47, that arose from the whole genome duplication
YDR040C	S000002447	ENA1	3276	4	538242	EVO3_9_	snp	G	A	100	10	Clone variant, synonoymous	P-type ATPase sodium pump; involved in Na+ and Li+ efflux to allow salt tolerance
YDR040C	S000002447	ENA1	3276	4	538248	EVO3_9_	snp	G	T	100	10	Clone variant, synonoymous	P-type ATPase sodium pump; involved in Na+ and Li+ efflux to allow salt tolerance
YLL038C	S000003961	ENT4	744	12	66043	EVO8_10_	snp	G	C	100	12	Clone variant, nonsynonymous	Protein of unknown function; contains an N-terminal epsin-like domain; proposed to be involved in the trafficking of Arn1p in the absence of ferrichrome
YLL038C	S000003961	ENT4	744	12	66046	EVO8_10_	snp	T	G	100	11	Clone variant, nonsynonymous	Protein of unknown function; contains an N-terminal epsin-like domain; proposed to be involved in the trafficking of Arn1p in the absence of ferrichrome
YFL024C	S000001870	EPL1	2499	6	87977	EVO5_11_	indel	C	+TTGCTGCTGTTGTTGCTGCTGTTGTTGTTG	100	5	Clone variant, nonsynonymous	Subunit of NuA4, an essential histone H4/H2A acetyltransferase complex; conserved region at N-terminus is essential for interaction with the NPC (nucleosome core particle); required for autophagy; homologous to Drosophila Enhancer of Polycomb; coding sequence contains length polymorphisms in different strains
YFL024C	S000001870	EPL1	2499	6	87977	EVO5_3_	indel	C	+TTGCTGCTGTTGTTGCTGCTGTTGTTGTTG	82	11	Clone variant, nonsynonymous	Subunit of NuA4, an essential histone H4/H2A acetyltransferase complex; conserved region at N-terminus is essential for interaction with the NPC (nucleosome core particle); required for autophagy; homologous to Drosophila Enhancer of Polycomb; coding sequence contains length polymorphisms in different strains
YFL024C	S000001870	EPL1	2499	6	90830	EVO5_4_	snp	A	C	100	37	Clone variant, promoter	Subunit of NuA4, an essential histone H4/H2A acetyltransferase complex; conserved region at N-terminus is essential for interaction with the NPC (nucleosome core particle); required for autophagy; homologous to Drosophila Enhancer of Polycomb; coding sequence contains length polymorphisms in different strains
YFL024C	S000001870	EPL1	2499	6	87977	EVO5_5_	indel	C	+TTGCTGCTGTTGTTGCTGCTGTTGTTGTTG	82	11	Clone variant, nonsynonymous	Subunit of NuA4, an essential histone H4/H2A acetyltransferase complex; conserved region at N-terminus is essential for interaction with the NPC (nucleosome core particle); required for autophagy; homologous to Drosophila Enhancer of Polycomb; coding sequence contains length polymorphisms in different strains
YFL024C	S000001870	EPL1	2499	6	87977	EVO7_4_	indel	C	+TTGCTGCTGTTGTTGCTGCTGTTGTTGTTG	85	13	Clone variant, nonsynonymous	Subunit of NuA4, an essential histone H4/H2A acetyltransferase complex; conserved region at N-terminus is essential for interaction with the NPC (nucleosome core particle); required for autophagy; homologous to Drosophila Enhancer of Polycomb; coding sequence contains length polymorphisms in different strains
YFL024C	S000001870	EPL1	2499	6	87977	EVO7_6_	indel	C	+TTGCTGCTGTTGTTGCTGCTGTTGTTGTTG	90	10	Clone variant, nonsynonymous	Subunit of NuA4, an essential histone H4/H2A acetyltransferase complex; conserved region at N-terminus is essential for interaction with the NPC (nucleosome core particle); required for autophagy; homologous to Drosophila Enhancer of Polycomb; coding sequence contains length polymorphisms in different strains
YFL024C	S000001870	EPL1	2499	6	87977	EVO7_9_	indel	C	+TTGCTGCTGTTGTTGCTGCTGTTGTTGTTG	76	21	Clone variant, nonsynonymous	Subunit of NuA4, an essential histone H4/H2A acetyltransferase complex; conserved region at N-terminus is essential for interaction with the NPC (nucleosome core particle); required for autophagy; homologous to Drosophila Enhancer of Polycomb; coding sequence contains length polymorphisms in different strains
YFL024C	S000001870	EPL1	2499	6	87977	EVO8_5_	indel	C	+TTGCTGCTGTTGTTGCTGCTGTTGTTGTTG	87	15	Clone variant, nonsynonymous	Subunit of NuA4, an essential histone H4/H2A acetyltransferase complex; conserved region at N-terminus is essential for interaction with the NPC (nucleosome core particle); required for autophagy; homologous to Drosophila Enhancer of Polycomb; coding sequence contains length polymorphisms in different strains
YFL024C	S000001870	EPL1	2499	6	87977	EVO8_9_	indel	C	+TTGCTGCTGTTGTTGCTGCTGTTGTTGTTG	100	6	Clone variant, nonsynonymous	Subunit of NuA4, an essential histone H4/H2A acetyltransferase complex; conserved region at N-terminus is essential for interaction with the NPC (nucleosome core particle); required for autophagy; homologous to Drosophila Enhancer of Polycomb; coding sequence contains length polymorphisms in different strains
YLR246W	S000004236	ERF2	1080	12	626433	EVO4_2_	indel	G	+AAAA	100	3	Clone variant, promoter	Subunit of a palmitoyltransferase; this complex adds a palmitoyl lipid moiety to heterolipidated substrates such as Ras1p and Ras2p through a thioester linkage; mutants partially mislocalize Ras2p to the vacuole; palmitoyltransferase is composed of Erf2p and Shr5p
YMR202W	S000004815	ERG2	669	13	667077	EVO5_11_	snp	C	T	100	17	Clone variant, promoter	C-8 sterol isomerase; catalyzes isomerization of delta-8 double bond to delta-7 position at an intermediate step in ergosterol biosynthesis; transcriptionally down-regulated when ergosterol is in excess; mutation is functionally complemented by human EBP
YAL007C	S000000005	ERP2	648	1	138253	EVO7_9_	snp	G	A	100	36	Clone variant, nonsynonymous	Member of the p24 family involved in ER to Golgi transport; similar to Emp24p and Erv25p; role in misfolded protein quality control; forms a heterotrimeric complex with Erp1p, Emp24p, and Erv25p; localized to COPII-coated vesicles; ERP2 has a paralog, ERP4, that arose from the whole genome duplication
YBR210W	S000000414	ERV15	429	2	645497	EVO8_7_	snp	C	A	100	38	Clone variant, promoter	Protein involved in export of proteins from the endoplasmic reticulum; ERV15 has a paralog, ERV14, that arose from the whole genome duplication
YMR219W	S000004832	ESC1	4977	13	708667	EVO8_10_	snp	C	A	100	11	Clone variant, nonsynonymous	Protein involved in telomeric silencing; required for quiescent cell telomere hypercluster localization at nuclear membrane vicinity; interacts with PAD4-domain of Sir4p
YMR219W	S000004832	ESC1	4977	13	708667	EVO8_5_	snp	C	A	100	23	Clone variant, nonsynonymous	Protein involved in telomeric silencing; required for quiescent cell telomere hypercluster localization at nuclear membrane vicinity; interacts with PAD4-domain of Sir4p
YMR219W	S000004832	ESC1	4977	13	708667	EVO8_7_	snp	C	A	100	25	Clone variant, nonsynonymous	Protein involved in telomeric silencing; required for quiescent cell telomere hypercluster localization at nuclear membrane vicinity; interacts with PAD4-domain of Sir4p
YMR219W	S000004832	ESC1	4977	13	708667	EVO8_9_	snp	C	A	100	6	Clone variant, nonsynonymous	Protein involved in telomeric silencing; required for quiescent cell telomere hypercluster localization at nuclear membrane vicinity; interacts with PAD4-domain of Sir4p
YDR365C	S000002773	ESF1	1887	4	1205305	EVO7_4_	snp	C	G	100	22	Clone variant, nonsynonymous	Nucleolar protein involved in pre-rRNA processing; depletion causes severely decreased 18S rRNA levels
YLR233C	S000004223	EST1	2100	12	608290	EVO6_3_	snp	C	T	100	11	Clone variant, nonsynonymous	TLC1 RNA-associated factor involved in telomere length regulation; recruitment subunit of telomerase; has G-quadruplex promoting activity required for telomere elongation; role in activating telomere-bound Est2p-TLC1-RNA; EST1 has a paralog, EBS1, that arose from the whole genome duplication
YOR051C	S000005577	ETT1	1239	15	426393	EVO8_5_	snp	T	A	100	10	Clone variant, promoter	Nuclear protein that inhibits replication of Brome mosaic virus; S. cerevisiae is a model system for studying replication of positive-strand RNA viruses in their natural hosts; deletion increases stop codon readthrough
YFL041W	S000001853	FET5	1869	6	50552	EVO1_3_	snp	C	T	100	32	Clone variant, nonsynonymous	Multicopper oxidase; integral membrane protein with similarity to Fet3p; may have a role in iron transport
YER032W	S000000834	FIR1	2631	5	215797	EVO1_3_	snp	C	T	100	27	Clone variant, nonsynonymous	Protein involved in 3' mRNA processing; interacts with Ref2p; APCC(Cdh1) substrate; potential Cdc28p substrate
YDR534C	S000002942	FIT1	1587	4	1504289	EVO5_3_	snp	A	C	96	25	Clone variant, nonsynonymous	Mannoprotein that is incorporated into the cell wall; incorporated via a glycosylphosphatidylinositol (GPI) anchor; involved in the retention of siderophore-iron in the cell wall
YDR534C	S000002942	FIT1	1587	4	1504289	EVO5_4_	snp	A	C	100	31	Clone variant, nonsynonymous	Mannoprotein that is incorporated into the cell wall; incorporated via a glycosylphosphatidylinositol (GPI) anchor; involved in the retention of siderophore-iron in the cell wall
YDR534C	S000002942	FIT1	1587	4	1504289	EVO5_5_	snp	A	C	100	30	Clone variant, nonsynonymous	Mannoprotein that is incorporated into the cell wall; incorporated via a glycosylphosphatidylinositol (GPI) anchor; involved in the retention of siderophore-iron in the cell wall
YHR176W	S000001219	FMO1	1299	8	455016	EVO1_12_	snp	C	T	100	24	Clone variant, synonoymous	Flavin-containing monooxygenase; localized to the cytoplasmic face of the ER membrane; catalyzes oxidation of biological thiols to maintain the ER redox buffer ratio for correct folding of disulfide-bonded proteins
YML074C	S000004539	FPR3	1236	13	121610	EVO2_1_	snp	G	A	97	32	Clone variant, promoter	Nucleolar peptidyl-prolyl cis-trans isomerase (PPIase); FK506 binding protein; affects expression of multiple genes via its role in nucleosome assembly; phosphorylated by casein kinase II (Cka1p-Cka2p-Ckb1p-Ckb2p) and dephosphorylated by Ptp1p; PPIase domain acts as a transcriptional repressor when tethered to DNA by lexA, and repressor activity is dependent on PPIase activity; FPR3 has a paralog…
YML074C	S000004539	FPR3	1236	13	121610	EVO2_2_	snp	G	A	100	28	Clone variant, promoter	Nucleolar peptidyl-prolyl cis-trans isomerase (PPIase); FK506 binding protein; affects expression of multiple genes via its role in nucleosome assembly; phosphorylated by casein kinase II (Cka1p-Cka2p-Ckb1p-Ckb2p) and dephosphorylated by Ptp1p; PPIase domain acts as a transcriptional repressor when tethered to DNA by lexA, and repressor activity is dependent on PPIase activity; FPR3 has a paralog…
YML074C	S000004539	FPR3	1236	13	121610	EVO2_3_	snp	G	A	100	26	Clone variant, promoter	Nucleolar peptidyl-prolyl cis-trans isomerase (PPIase); FK506 binding protein; affects expression of multiple genes via its role in nucleosome assembly; phosphorylated by casein kinase II (Cka1p-Cka2p-Ckb1p-Ckb2p) and dephosphorylated by Ptp1p; PPIase domain acts as a transcriptional repressor when tethered to DNA by lexA, and repressor activity is dependent on PPIase activity; FPR3 has a paralog…
YNR060W	S000005343	FRE4	2160	14	740890	EVO7_4_	snp	G	A	100	21	Clone variant, nonsynonymous	Ferric reductase; reduces a specific subset of siderophore-bound iron prior to uptake by transporters; expression induced by low iron levels
YNR060W	S000005343	FRE4	2160	14	740890	EVO7_6_	snp	G	A	100	28	Clone variant, nonsynonymous	Ferric reductase; reduces a specific subset of siderophore-bound iron prior to uptake by transporters; expression induced by low iron levels
YNR060W	S000005343	FRE4	2160	14	740890	EVO7_7_	snp	G	A	100	23	Clone variant, nonsynonymous	Ferric reductase; reduces a specific subset of siderophore-bound iron prior to uptake by transporters; expression induced by low iron levels
YNR060W	S000005343	FRE4	2160	14	740890	EVO7_9_	snp	G	A	100	19	Clone variant, nonsynonymous	Ferric reductase; reduces a specific subset of siderophore-bound iron prior to uptake by transporters; expression induced by low iron levels
YAL028W	S000000026	FRT2	1587	1	92741	EVO5_5_	snp	A	T	100	17	Clone variant, promoter	Tail-anchored ER membrane protein of unknown function; interacts with homolog Frt1p; promotes growth in conditions of high Na+, alkaline pH, or cell wall stress, possibly via a role in posttranslational translocation; potential Cdc28p substrate; FRT2 has a paralog, FRT1, that arose from the whole genome duplication
YAL019W	S000000017	FUN30	3396	1	115434	EVO2_1_	snp	C	T	100	15	Clone variant, nonsynonymous	Snf2p family member with ATP-dependent chromatin remodeling activity; has a role in silencing at the mating type locus, telomeres and centromeres; enriched at centromeres and is required for correct chromatin structure around centromeres, as well as at the boundary element of the silent HMR; recruited to DNA double-strand breaks (DSBs) where it promotes 5' strand resection of DSBs; potential Cdc2…
YAL019W	S000000017	FUN30	3396	1	115434	EVO2_2_	snp	C	T	100	24	Clone variant, nonsynonymous	Snf2p family member with ATP-dependent chromatin remodeling activity; has a role in silencing at the mating type locus, telomeres and centromeres; enriched at centromeres and is required for correct chromatin structure around centromeres, as well as at the boundary element of the silent HMR; recruited to DNA double-strand breaks (DSBs) where it promotes 5' strand resection of DSBs; potential Cdc2…
YAL019W	S000000017	FUN30	3396	1	115434	EVO2_3_	snp	C	T	100	20	Clone variant, nonsynonymous	Snf2p family member with ATP-dependent chromatin remodeling activity; has a role in silencing at the mating type locus, telomeres and centromeres; enriched at centromeres and is required for correct chromatin structure around centromeres, as well as at the boundary element of the silent HMR; recruited to DNA double-strand breaks (DSBs) where it promotes 5' strand resection of DSBs; potential Cdc2…
YOL051W	S000005411	GAL11	3246	15	235340	EVO2_10_	snp	T	C	93	14	Clone variant, synonoymous	Subunit of the RNA polymerase II mediator complex; associates with core polymerase subunits to form the RNA polymerase II holoenzyme; affects transcription by acting as target of activators and repressors; forms part of the tail domain of mediator
YGL195W	S000003163	GCN1	8019	7	134409	EVO2_1_	snp	G	T	100	16	Clone variant, nonsynonymous	Positive regulator of the Gcn2p kinase activity; forms a complex with Gcn20p; proposed to stimulate Gcn2p activation by an uncharged tRNA
YGL195W	S000003163	GCN1	8019	7	134409	EVO2_10_	snp	G	T	100	18	Clone variant, nonsynonymous	Positive regulator of the Gcn2p kinase activity; forms a complex with Gcn20p; proposed to stimulate Gcn2p activation by an uncharged tRNA
YGL195W	S000003163	GCN1	8019	7	134409	EVO2_2_	snp	G	T	100	24	Clone variant, nonsynonymous	Positive regulator of the Gcn2p kinase activity; forms a complex with Gcn20p; proposed to stimulate Gcn2p activation by an uncharged tRNA
YGL195W	S000003163	GCN1	8019	7	134409	EVO2_3_	snp	G	T	100	16	Clone variant, nonsynonymous	Positive regulator of the Gcn2p kinase activity; forms a complex with Gcn20p; proposed to stimulate Gcn2p activation by an uncharged tRNA
YPL110C	S000006031	GDE1	3672	16	342929	EVO1_3_	snp	C	T	100	25	Clone variant, nonsynonymous	Glycerophosphocholine (GroPCho) phosphodiesterase; hydrolyzes GroPCho to choline and glycerolphosphate, for use as a phosphate source and as a precursor for phosphocholine synthesis; may interact with ribosomes
YJR040W	S000003801	GEF1	2340	10	509455	EVO5_3_	indel	G	-AAGACGAGC	83	24	Clone variant, nonsynonymous	Voltage-gated chloride channel; localized to the golgi, the endosomal system, and plasma membrane; involved in cation homeostasis; highly homologous to vertebrate voltage-gated chloride channels; modulates TBSV model (+) RNA virus replication by regulating copper metabolism
YDR152W	S000002559	GIR2	798	4	765151	EVO5_11_	snp	T	C	100	17	Clone variant, promoter	Highly-acidic RWD domain-containing cytoplasmic protein; forms a highly conserved complex with Rbg2p that is responsible for efficient cell growth under amino acid starvation and binds translational activator Gcn1p in dose-dependent manner according to stress level; associates with translating ribosomes; intrinsically unstructured protein whose stability is enhanced upon binding Rbg2p
YLL035W	S000003958	GRC3	1899	12	70712	EVO1_12_	snp	C	A	100	17	Clone variant, other	Polynucleotide kinase present on rDNA; required for efficient transcription termination by RNA polymerase I; functions with Las1p in a conserved mechanism to modulate rRNA processing and ribosome biogenesis; required for cell growth; mRNA is cell-cycle regulated
YLL035W	S000003958	GRC3	1899	12	70712	EVO1_9_	snp	C	A	100	14	Clone variant, other	Polynucleotide kinase present on rDNA; required for efficient transcription termination by RNA polymerase I; functions with Las1p in a conserved mechanism to modulate rRNA processing and ribosome biogenesis; required for cell growth; mRNA is cell-cycle regulated
YJL091C	S000003627	GWT1	1473	10	263247	EVO3_1_	indel	G	+T	100	5	Clone variant, promoter	Protein involved in the inositol acylation of GlcN-PI; the inositol acylation of glucosaminyl phosphatidylinositol (GlcN-PI) forms glucosaminyl(acyl)phosphatidylinositol (GlcN(acyl)PI), an intermediate in the biosynthesis of glycosylphosphatidylinositol (GPI) anchors
YJL091C	S000003627	GWT1	1473	10	263247	EVO3_12_	indel	G	+T	85	26	Clone variant, promoter	Protein involved in the inositol acylation of GlcN-PI; the inositol acylation of glucosaminyl phosphatidylinositol (GlcN-PI) forms glucosaminyl(acyl)phosphatidylinositol (GlcN(acyl)PI), an intermediate in the biosynthesis of glycosylphosphatidylinositol (GPI) anchors
YJL091C	S000003627	GWT1	1473	10	263247	EVO3_8_	indel	G	+T	86	7	Clone variant, promoter	Protein involved in the inositol acylation of GlcN-PI; the inositol acylation of glucosaminyl phosphatidylinositol (GlcN-PI) forms glucosaminyl(acyl)phosphatidylinositol (GlcN(acyl)PI), an intermediate in the biosynthesis of glycosylphosphatidylinositol (GPI) anchors
YJL091C	S000003627	GWT1	1473	10	263247	EVO3_9_	indel	G	+T	93	14	Clone variant, promoter	Protein involved in the inositol acylation of GlcN-PI; the inositol acylation of glucosaminyl phosphatidylinositol (GlcN-PI) forms glucosaminyl(acyl)phosphatidylinositol (GlcN(acyl)PI), an intermediate in the biosynthesis of glycosylphosphatidylinositol (GPI) anchors
YBL021C	S000000117	HAP3	435	2	182141	EVO6_1_	snp	G	A	100	9	Clone variant, promoter	Subunit of the Hap2p/3p/4p/5p CCAAT-binding complex; complex is heme-activated and glucose-repressed; complex is a transcriptional activator and global regulator of respiratory gene expression; contains sequences contributing to both complex assembly and DNA binding
YBL021C	S000000117	HAP3	435	2	182141	EVO6_7_	snp	G	A	100	21	Clone variant, promoter	Subunit of the Hap2p/3p/4p/5p CCAAT-binding complex; complex is heme-activated and glucose-repressed; complex is a transcriptional activator and global regulator of respiratory gene expression; contains sequences contributing to both complex assembly and DNA binding
YJL033W	S000003570	HCA4	2313	10	384779	EVO7_7_	snp	A	T	100	23	Clone variant, nonsynonymous	DEAD box RNA helicase; component of the SSU; interacts with Bfr2p and Enp2p; high-copy number suppression of a U14 snoRNA processing mutant suggests an involvement in 18S rRNA synthesis
YMR207C	S000004820	HFA1	6372	13	680438	EVO4_9_	snp	C	T	100	21	Clone variant, nonsynonymous	Mitochondrial acetyl-coenzyme A carboxylase; catalyzes production of malonyl-CoA in mitochondrial fatty acid biosynthesis; relocalizes from mitochondrion to cytoplasm upon DNA replication stress; genetic and comparative analysis suggests that translation begins at a non-canonical (Ile) start codon at -372 relative to the annotated start codon
YMR110C	S000004716	HFD1	1599	13	492589	EVO7_7_	snp	G	T	100	19	Clone variant, promoter	Dehydrogenase involved in ubiquinone and sphingolipid metabolism; converts 4-hydroxybenzaldehyde into 4-hydroxybenzoate for ubiquinone anabolism, hexadecenal to hexadecenoic acid in sphingosine 1-phosphate catabolism; human homolog ALDH3A2, mutated in Sjogren-Larsson syndrome, can rescue yeast hfd1 mutant; human ALDH3A1, but not ALDH3A2, rescues pABA- respiratory growth phenotype of hfd1 null; da…
YER057C	S000000859	HMF1	390	5	271169	EVO8_5_	snp	G	C	100	31	Clone variant, promoter	Member of the p14.5 protein family; functionally complements Mmf1p function when targeted to mitochondria; heat shock inducible; high-dosage growth inhibitor; forms a homotrimer in vitro; HMF1 has a paralog, MMF1, that arose from the whole genome duplication
YLR450W	S000004442	HMG2	3138	12	1034087	EVO4_9_	snp	G	C	100	25	Clone variant, nonsynonymous	HMG-CoA reductase; converts HMG-CoA to mevalonate, a rate-limiting step in sterol biosynthesis; one of two isozymes; overproduction induces assembly of peripheral ER membrane arrays and short nuclear-associated membrane stacks; forms foci at nuclear periphery upon DNA replication stress; HMG2 has a paralog, HMG1, that arose from the whole genome duplication; human homolog HMGCR can complement yea…
YOR032C	S000005558	HMS1	1305	15	389745	EVO5_5_	snp	G	A	100	16	Clone variant, other	bHLH protein with similarity to myc-family transcription factors; overexpression confers hyperfilamentous growth and suppresses the pseudohyphal filamentation defect of a diploid mep1 mep2 homozygous null mutant
YGL077C	S000003045	HNM1	1692	7	362666	EVO1_7_	snp	G	C	100	31	Clone variant, nonsynonymous	Plasma membrane transporter for choline, ethanolamine, and carnitine; involved in the uptake of nitrogen mustard and the uptake of glycine betaine during hypersaline stress; co-regulated with phospholipid biosynthetic genes and negatively regulated by choline and myo-inositol
YMR172W	S000004783	HOT1	2160	13	605712	EVO5_5_	snp	G	A	100	16	Clone variant, promoter	Transcription factor for glycerol biosynthetic genes; required for the transient induction of glycerol biosynthetic genes GPD1 and GPP2 in response to high osmolarity; targets Hog1p to osmostress responsive promoters; has similarity to Msn1p and Gcr1p
YOL013C	S000005373	HRD1	1656	15	301168	EVO3_12_	snp	A	G	100	31	Clone variant, other	Ubiquitin-protein ligase involved in ER-associated degradation (ERAD) of misfolded proteins; upon autoubiquitination triggers retrotranslocation of misfolded proteins to cytosol for degradation; genetically linked to the unfolded protein response (UPR); regulated through association with Hrd3p; contains an H2 ring finger; likely plays a general role in targeting proteins that persistently associa…
YOL013C	S000005373	HRD1	1656	15	301168	EVO3_9_	snp	A	G	100	17	Clone variant, other	Ubiquitin-protein ligase involved in ER-associated degradation (ERAD) of misfolded proteins; upon autoubiquitination triggers retrotranslocation of misfolded proteins to cytosol for degradation; genetically linked to the unfolded protein response (UPR); regulated through association with Hrd3p; contains an H2 ring finger; likely plays a general role in targeting proteins that persistently associa…
YLR207W	S000004197	HRD3	2502	12	556966	EVO1_12_	snp	T	A	100	26	Clone variant, nonsynonymous	ER membrane protein that plays a central role in ERAD; forms HRD complex with Hrd1p and ER-associated protein degradation (ERAD) determinants that engages in lumen to cytosol communication and coordination of ERAD events
YLR207W	S000004197	HRD3	2502	12	557962	EVO6_5_	snp	T	C	100	21	Clone variant, synonoymous	ER membrane protein that plays a central role in ERAD; forms HRD complex with Hrd1p and ER-associated protein degradation (ERAD) determinants that engages in lumen to cytosol communication and coordination of ERAD events
YLR097C	S000004087	HRT3	1035	12	336579	EVO2_1_	snp	T	C	100	23	Clone variant, nonsynonymous	Putative SCF-ubiquitin ligase F-box protein; based on both genetic and physical interactions and sequence similarity; identified in association with Cdc53p, Skp1p and Ubi4 in large and small-scale studies
YLR097C	S000004087	HRT3	1035	12	336579	EVO2_10_	snp	T	C	100	30	Clone variant, nonsynonymous	Putative SCF-ubiquitin ligase F-box protein; based on both genetic and physical interactions and sequence similarity; identified in association with Cdc53p, Skp1p and Ubi4 in large and small-scale studies
YLR097C	S000004087	HRT3	1035	12	336579	EVO2_2_	snp	T	C	96	26	Clone variant, nonsynonymous	Putative SCF-ubiquitin ligase F-box protein; based on both genetic and physical interactions and sequence similarity; identified in association with Cdc53p, Skp1p and Ubi4 in large and small-scale studies
YLR097C	S000004087	HRT3	1035	12	336579	EVO2_3_	snp	T	C	100	27	Clone variant, nonsynonymous	Putative SCF-ubiquitin ligase F-box protein; based on both genetic and physical interactions and sequence similarity; identified in association with Cdc53p, Skp1p and Ubi4 in large and small-scale studies
YDR258C	S000002666	HSP78	2436	4	974679	EVO6_5_	snp	A	T	100	10	Clone variant, promoter	Oligomeric mitochondrial matrix chaperone; cooperates with Ssc1p in mitochondrial thermotolerance after heat shock; able to prevent the aggregation of misfolded proteins as well as resolubilize protein aggregates
YDR345C	S000002753	HXT3	1704	4	1163299	EVO7_9_	snp	G	T	100	47	Clone variant, nonsynonymous	Low affinity glucose transporter of the major facilitator superfamily; expression is induced in low or high glucose conditions; HXT3 has a paralog, HXT5, that arose from the whole genome duplication
YJR118C	S000003879	ILM1	612	10	644469	EVO5_11_	snp	T	C	100	11	Clone variant, promoter	Protein of unknown function; may be involved in mitochondrial DNA maintenance; required for slowed DNA synthesis-induced filamentous growth
YBL076C	S000000172	ILS1	3219	2	83194	EVO1_7_	snp	A	T	100	32	Clone variant, nonsynonymous	Cytoplasmic isoleucine-tRNA synthetase; target of the G1-specific inhibitor reveromycin A
YMR163C	S000004773	INP2	2118	13	585165	EVO8_10_	snp	G	T	100	32	Clone variant, nonsynonymous	Peroxisome-specific receptor important for peroxisome inheritance; co-fractionates with peroxisome membranes and co-localizes with peroxisomes in vivo; physically interacts with the myosin V motor Myo2p; INP2 is not an essential gene
YIL002C	S000001264	INP51	2841	9	351855	EVO2_3_	snp	C	A	100	21	Clone variant, nonsynonymous	Phosphatidylinositol 4,5-bisphosphate 5-phosphatase; synaptojanin-like protein with an N-terminal Sac1 domain, plays a role in phosphatidylinositol 4,5-bisphosphate homeostasis and in endocytosis; null mutation confers cold-tolerant growth
YOL081W	S000005441	IRA2	9240	15	178266	EVO3_1_	snp	G	A	100	11	Clone variant, nonsynonymous	GTPase-activating protein; negatively regulates RAS by converting it from the GTP- to the GDP-bound inactive form, required for reducing cAMP levels under nutrient limiting conditions; IRA2 has a paralog, IRA1, that arose from the whole genome duplication; defects in human homolog NF1 are associated with neurofibromatosis
YDR540C	S000002948	IRC4	540	4	1517679	EVO4_2_	indel	G	-T	100	7	Clone variant, promoter	Protein of unknown function; null mutant displays increased levels of spontaneous Rad52p foci; green fluorescent protein (GFP)-fusion protein localizes to the cytoplasm and nucleus
YDR540C	S000002948	IRC4	540	4	1517679	EVO4_5_	indel	G	-T	100	4	Clone variant, promoter	Protein of unknown function; null mutant displays increased levels of spontaneous Rad52p foci; green fluorescent protein (GFP)-fusion protein localizes to the cytoplasm and nucleus
YDR540C	S000002948	IRC4	540	4	1517679	EVO4_9_	indel	G	-T	100	11	Clone variant, promoter	Protein of unknown function; null mutant displays increased levels of spontaneous Rad52p foci; green fluorescent protein (GFP)-fusion protein localizes to the cytoplasm and nucleus
YER048W-A	S000007237	ISD11	285	5	250436	EVO5_5_	snp	G	A	100	24	Clone variant, promoter	Cysteine desulfurase (Nfs1p) activator; essential for the formation of the persulfide intermediate at the desulfurase active site during pyridoxal phosphate-dependent desulfuration of cysteine; required for mitochondrial iron-sulfur cluster biosynthesis; exclusive to eukaryotes, implicated as eukaryotic supplement to the bacterium-derived Fe-S cluster (ISC) assembly apparatus; involved in regulat…
YNL265C	S000005209	IST1	1002	14	144912	EVO1_9_	snp	G	A	95	22	Clone variant, synonoymous	Protein with positive role in the multivesicular body sorting pathway; functions and forms a complex with Did2p; recruitment to endosomes is mediated by the Vps2p-Vps24p subcomplex of ESCRT-III; also interacts with Vps4p
YKL032C	S000001515	IXR1	1794	11	380465	EVO1_12_	snp	T	G	100	10	Clone variant, nonsynonymous	Transcriptional repressor that regulates hypoxic genes during normoxia; involved in the aerobic repression of genes such as COX5b, TIR1, and HEM13; binds DNA intrastrand cross-links formed by cisplatin; HMG (high mobility group box) domain containing protein which binds and bends cisplatin-modified DNA, blocking excision repair; IXR1 has a paralog, ABF2, that arose from the whole genome duplicati…
YKL032C	S000001515	IXR1	1794	11	380465	EVO1_3_	snp	T	G	100	20	Clone variant, nonsynonymous	Transcriptional repressor that regulates hypoxic genes during normoxia; involved in the aerobic repression of genes such as COX5b, TIR1, and HEM13; binds DNA intrastrand cross-links formed by cisplatin; HMG (high mobility group box) domain containing protein which binds and bends cisplatin-modified DNA, blocking excision repair; IXR1 has a paralog, ABF2, that arose from the whole genome duplicati…
YKL032C	S000001515	IXR1	1794	11	380465	EVO1_7_	snp	T	G	100	16	Clone variant, nonsynonymous	Transcriptional repressor that regulates hypoxic genes during normoxia; involved in the aerobic repression of genes such as COX5b, TIR1, and HEM13; binds DNA intrastrand cross-links formed by cisplatin; HMG (high mobility group box) domain containing protein which binds and bends cisplatin-modified DNA, blocking excision repair; IXR1 has a paralog, ABF2, that arose from the whole genome duplicati…
YKL032C	S000001515	IXR1	1794	11	380465	EVO1_9_	snp	T	G	100	14	Clone variant, nonsynonymous	Transcriptional repressor that regulates hypoxic genes during normoxia; involved in the aerobic repression of genes such as COX5b, TIR1, and HEM13; binds DNA intrastrand cross-links formed by cisplatin; HMG (high mobility group box) domain containing protein which binds and bends cisplatin-modified DNA, blocking excision repair; IXR1 has a paralog, ABF2, that arose from the whole genome duplicati…
YKL032C	S000001515	IXR1	1794	11	380936	EVO3_1_	snp	G	A	100	6	Clone variant, nonsynonymous	Transcriptional repressor that regulates hypoxic genes during normoxia; involved in the aerobic repression of genes such as COX5b, TIR1, and HEM13; binds DNA intrastrand cross-links formed by cisplatin; HMG (high mobility group box) domain containing protein which binds and bends cisplatin-modified DNA, blocking excision repair; IXR1 has a paralog, ABF2, that arose from the whole genome duplicati…
YKL032C	S000001515	IXR1	1794	11	380936	EVO3_12_	snp	G	A	100	20	Clone variant, nonsynonymous	Transcriptional repressor that regulates hypoxic genes during normoxia; involved in the aerobic repression of genes such as COX5b, TIR1, and HEM13; binds DNA intrastrand cross-links formed by cisplatin; HMG (high mobility group box) domain containing protein which binds and bends cisplatin-modified DNA, blocking excision repair; IXR1 has a paralog, ABF2, that arose from the whole genome duplicati…
YKL032C	S000001515	IXR1	1794	11	380936	EVO3_8_	snp	G	A	100	8	Clone variant, nonsynonymous	Transcriptional repressor that regulates hypoxic genes during normoxia; involved in the aerobic repression of genes such as COX5b, TIR1, and HEM13; binds DNA intrastrand cross-links formed by cisplatin; HMG (high mobility group box) domain containing protein which binds and bends cisplatin-modified DNA, blocking excision repair; IXR1 has a paralog, ABF2, that arose from the whole genome duplicati…
YKL032C	S000001515	IXR1	1794	11	380936	EVO3_9_	snp	G	A	100	18	Clone variant, nonsynonymous	Transcriptional repressor that regulates hypoxic genes during normoxia; involved in the aerobic repression of genes such as COX5b, TIR1, and HEM13; binds DNA intrastrand cross-links formed by cisplatin; HMG (high mobility group box) domain containing protein which binds and bends cisplatin-modified DNA, blocking excision repair; IXR1 has a paralog, ABF2, that arose from the whole genome duplicati…
YKL032C	S000001515	IXR1	1794	11	381779	EVO4_2_	snp	G	A	100	17	Clone variant, nonsynonymous	Transcriptional repressor that regulates hypoxic genes during normoxia; involved in the aerobic repression of genes such as COX5b, TIR1, and HEM13; binds DNA intrastrand cross-links formed by cisplatin; HMG (high mobility group box) domain containing protein which binds and bends cisplatin-modified DNA, blocking excision repair; IXR1 has a paralog, ABF2, that arose from the whole genome duplicati…
YKL032C	S000001515	IXR1	1794	11	381779	EVO4_3_	snp	G	A	100	21	Clone variant, nonsynonymous	Transcriptional repressor that regulates hypoxic genes during normoxia; involved in the aerobic repression of genes such as COX5b, TIR1, and HEM13; binds DNA intrastrand cross-links formed by cisplatin; HMG (high mobility group box) domain containing protein which binds and bends cisplatin-modified DNA, blocking excision repair; IXR1 has a paralog, ABF2, that arose from the whole genome duplicati…
YKL032C	S000001515	IXR1	1794	11	381779	EVO4_5_	snp	G	A	100	18	Clone variant, nonsynonymous	Transcriptional repressor that regulates hypoxic genes during normoxia; involved in the aerobic repression of genes such as COX5b, TIR1, and HEM13; binds DNA intrastrand cross-links formed by cisplatin; HMG (high mobility group box) domain containing protein which binds and bends cisplatin-modified DNA, blocking excision repair; IXR1 has a paralog, ABF2, that arose from the whole genome duplicati…
YKL032C	S000001515	IXR1	1794	11	381779	EVO4_9_	snp	G	A	100	30	Clone variant, nonsynonymous	Transcriptional repressor that regulates hypoxic genes during normoxia; involved in the aerobic repression of genes such as COX5b, TIR1, and HEM13; binds DNA intrastrand cross-links formed by cisplatin; HMG (high mobility group box) domain containing protein which binds and bends cisplatin-modified DNA, blocking excision repair; IXR1 has a paralog, ABF2, that arose from the whole genome duplicati…
YKL032C	S000001515	IXR1	1794	11	380864	EVO5_3_	snp	G	A	100	8	Clone variant, nonsynonymous	Transcriptional repressor that regulates hypoxic genes during normoxia; involved in the aerobic repression of genes such as COX5b, TIR1, and HEM13; binds DNA intrastrand cross-links formed by cisplatin; HMG (high mobility group box) domain containing protein which binds and bends cisplatin-modified DNA, blocking excision repair; IXR1 has a paralog, ABF2, that arose from the whole genome duplicati…
YKL032C	S000001515	IXR1	1794	11	380864	EVO5_4_	snp	G	A	100	21	Clone variant, nonsynonymous	Transcriptional repressor that regulates hypoxic genes during normoxia; involved in the aerobic repression of genes such as COX5b, TIR1, and HEM13; binds DNA intrastrand cross-links formed by cisplatin; HMG (high mobility group box) domain containing protein which binds and bends cisplatin-modified DNA, blocking excision repair; IXR1 has a paralog, ABF2, that arose from the whole genome duplicati…
YKL032C	S000001515	IXR1	1794	11	380864	EVO5_5_	snp	G	A	100	13	Clone variant, nonsynonymous	Transcriptional repressor that regulates hypoxic genes during normoxia; involved in the aerobic repression of genes such as COX5b, TIR1, and HEM13; binds DNA intrastrand cross-links formed by cisplatin; HMG (high mobility group box) domain containing protein which binds and bends cisplatin-modified DNA, blocking excision repair; IXR1 has a paralog, ABF2, that arose from the whole genome duplicati…
YKL032C	S000001515	IXR1	1794	11	380595	EVO6_1_	snp	G	C	100	9	Clone variant, nonsynonymous	Transcriptional repressor that regulates hypoxic genes during normoxia; involved in the aerobic repression of genes such as COX5b, TIR1, and HEM13; binds DNA intrastrand cross-links formed by cisplatin; HMG (high mobility group box) domain containing protein which binds and bends cisplatin-modified DNA, blocking excision repair; IXR1 has a paralog, ABF2, that arose from the whole genome duplicati…
YKL032C	S000001515	IXR1	1794	11	380595	EVO6_3_	snp	G	C	100	10	Clone variant, nonsynonymous	Transcriptional repressor that regulates hypoxic genes during normoxia; involved in the aerobic repression of genes such as COX5b, TIR1, and HEM13; binds DNA intrastrand cross-links formed by cisplatin; HMG (high mobility group box) domain containing protein which binds and bends cisplatin-modified DNA, blocking excision repair; IXR1 has a paralog, ABF2, that arose from the whole genome duplicati…
YKL032C	S000001515	IXR1	1794	11	380595	EVO6_5_	snp	G	C	100	12	Clone variant, nonsynonymous	Transcriptional repressor that regulates hypoxic genes during normoxia; involved in the aerobic repression of genes such as COX5b, TIR1, and HEM13; binds DNA intrastrand cross-links formed by cisplatin; HMG (high mobility group box) domain containing protein which binds and bends cisplatin-modified DNA, blocking excision repair; IXR1 has a paralog, ABF2, that arose from the whole genome duplicati…
YKL032C	S000001515	IXR1	1794	11	380595	EVO6_7_	snp	G	C	100	10	Clone variant, nonsynonymous	Transcriptional repressor that regulates hypoxic genes during normoxia; involved in the aerobic repression of genes such as COX5b, TIR1, and HEM13; binds DNA intrastrand cross-links formed by cisplatin; HMG (high mobility group box) domain containing protein which binds and bends cisplatin-modified DNA, blocking excision repair; IXR1 has a paralog, ABF2, that arose from the whole genome duplicati…
YKL032C	S000001515	IXR1	1794	11	380782	EVO8_10_	indel	T	-G	100	13	Clone variant, nonsynonymous	Transcriptional repressor that regulates hypoxic genes during normoxia; involved in the aerobic repression of genes such as COX5b, TIR1, and HEM13; binds DNA intrastrand cross-links formed by cisplatin; HMG (high mobility group box) domain containing protein which binds and bends cisplatin-modified DNA, blocking excision repair; IXR1 has a paralog, ABF2, that arose from the whole genome duplicati…
YKL032C	S000001515	IXR1	1794	11	380782	EVO8_5_	indel	T	-G	95	19	Clone variant, nonsynonymous	Transcriptional repressor that regulates hypoxic genes during normoxia; involved in the aerobic repression of genes such as COX5b, TIR1, and HEM13; binds DNA intrastrand cross-links formed by cisplatin; HMG (high mobility group box) domain containing protein which binds and bends cisplatin-modified DNA, blocking excision repair; IXR1 has a paralog, ABF2, that arose from the whole genome duplicati…
YKL032C	S000001515	IXR1	1794	11	380782	EVO8_7_	indel	T	-G	100	23	Clone variant, nonsynonymous	Transcriptional repressor that regulates hypoxic genes during normoxia; involved in the aerobic repression of genes such as COX5b, TIR1, and HEM13; binds DNA intrastrand cross-links formed by cisplatin; HMG (high mobility group box) domain containing protein which binds and bends cisplatin-modified DNA, blocking excision repair; IXR1 has a paralog, ABF2, that arose from the whole genome duplicati…
YKL032C	S000001515	IXR1	1794	11	380782	EVO8_9_	indel	T	-G	100	9	Clone variant, nonsynonymous	Transcriptional repressor that regulates hypoxic genes during normoxia; involved in the aerobic repression of genes such as COX5b, TIR1, and HEM13; binds DNA intrastrand cross-links formed by cisplatin; HMG (high mobility group box) domain containing protein which binds and bends cisplatin-modified DNA, blocking excision repair; IXR1 has a paralog, ABF2, that arose from the whole genome duplicati…
YKL217W	S000001700	JEN1	1851	11	23174	EVO1_7_	snp	G	T	100	31	Clone variant, nonsynonymous	Monocarboxylate/proton symporter of the plasma membrane; transport activity is dependent on the pH gradient across the membrane; mediates high-affinity uptake of carbon sources lactate, pyuvate, and acetate, and also of the micronutrient selenite, whose structure mimics that of monocarboxylates; expression and localization are tightly regulated, with transcription repression, mRNA degradation, an…
YJR119C	S000003880	JHD2	2187	10	644469	EVO5_11_	snp	T	C	100	11	Clone variant, nonsynonymous	JmjC domain family histone demethylase; promotes global demethylation of H3K4 and repression of noncoding intergenic transcription during sporulation; removes methyl groups added by Set1p methyltransferase; negatively regulated by H3K14 acetylation; protein levels regulated by Not4p polyubiquitin-mediated degradation; regulates sporulation timing by extending period of active transcription in opp…
YDR475C	S000002883	JIP4	2631	4	1410078	EVO7_6_	snp	G	T	100	22	Clone variant, nonsynonymous	Protein of unknown function; previously annotated as two separate ORFs, YDR474C and YDR475C, which were merged as a result of corrections to the systematic reference sequence; JIP4 has a paralog, YOR019W, that arose from the whole genome duplication
YJR091C	S000003851	JSN1	3276	10	596980	EVO6_7_	snp	C	A	100	16	Clone variant, nonsynonymous	Member of the Puf family of RNA-binding proteins; interacts with mRNAs encoding membrane-associated proteins; involved in localizing the Arp2/3 complex to mitochondria; overexpression causes increased sensitivity to benomyl; JSN1 has a paralog, PUF2, that arose from the whole genome duplication
YER110C	S000000912	KAP123	3342	5	381757	EVO1_3_	snp	C	G	100	19	Clone variant, nonsynonymous	Karyopherin beta; mediates nuclear import of ribosomal proteins prior to assembly into ribosomes and import of histones H3 and H4; localizes to the nuclear pore, nucleus, and cytoplasm; exhibits genetic interactions with RAI1
YJL034W	S000003571	KAR2	2049	10	381435	EVO4_5_	snp	A	G	100	11	Clone variant, nonsynonymous	ATPase involved in protein import into the ER; also acts as a chaperone to mediate protein folding in the ER and may play a role in ER export of soluble proteins; regulates the unfolded protein response via interaction with Ire1p
YJL094C	S000003630	KHA1	2622	10	252725	EVO8_10_	snp	T	C	100	30	Clone variant, nonsynonymous	Putative K+/H+ antiporter; has a probable role in intracellular cation homeostasis; localized to Golgi vesicles and detected in highly purified mitochondria in high-throughput studies
YLR096W	S000004086	KIN2	3444	12	335921	EVO4_2_	snp	T	C	100	26	Clone variant, synonoymous	S/T protein kinase; regulates polarized exocytosis and the Ire1p-mediated UPR; regulates HAC1 mRNA translocation, splicing and translation with KIN1 during ER stress; direct phosphorylation of Sec9p (S190) is enhanced by prior substrate priming (S192); localizes to the cytoplasmic face of the PM and sites of polarized growth; may regulate septin and cell wall organization; activation loop phospho…
YDR483W	S000002891	KRE2	1329	4	1422668	EVO2_10_	snp	T	A	100	12	Clone variant, other	Alpha1,2-mannosyltransferase of the Golgi; involved in protein mannosylation; KRE2 has a paralog, KTR6, that arose from the whole genome duplication
YBR199W	S000000403	KTR4	1395	2	618587	EVO7_4_	snp	C	T	100	15	Clone variant, promoter	Glycosyltransferase involved in protein glycosylation; transfers GDP-mannose to methyl-alpha-mannoside in vitro; member of the KRE2/MNT1 mannosyltransferase family of type II membrane proteins with a short cytoplasmic N-terminus, a membrane-spanning region and a highly conserved catalytic lumenal domain
YBR199W	S000000403	KTR4	1395	2	618587	EVO7_6_	snp	C	T	100	12	Clone variant, promoter	Glycosyltransferase involved in protein glycosylation; transfers GDP-mannose to methyl-alpha-mannoside in vitro; member of the KRE2/MNT1 mannosyltransferase family of type II membrane proteins with a short cytoplasmic N-terminus, a membrane-spanning region and a highly conserved catalytic lumenal domain
YBR199W	S000000403	KTR4	1395	2	618587	EVO7_7_	snp	C	T	100	18	Clone variant, promoter	Glycosyltransferase involved in protein glycosylation; transfers GDP-mannose to methyl-alpha-mannoside in vitro; member of the KRE2/MNT1 mannosyltransferase family of type II membrane proteins with a short cytoplasmic N-terminus, a membrane-spanning region and a highly conserved catalytic lumenal domain
YBR199W	S000000403	KTR4	1395	2	618587	EVO7_9_	snp	C	T	100	33	Clone variant, promoter	Glycosyltransferase involved in protein glycosylation; transfers GDP-mannose to methyl-alpha-mannoside in vitro; member of the KRE2/MNT1 mannosyltransferase family of type II membrane proteins with a short cytoplasmic N-terminus, a membrane-spanning region and a highly conserved catalytic lumenal domain
YDR499W	S000002907	LCD1	2244	4	1448364	EVO2_1_	snp	G	A	100	14	Clone variant, nonsynonymous	Essential protein required for the DNA integrity checkpoint pathways; interacts physically with Mec1p; putative homolog of S. pombe Rad26 and human ATRIP; forms nuclear foci upon DNA replication stress
YDR499W	S000002907	LCD1	2244	4	1448364	EVO2_10_	snp	G	A	100	10	Clone variant, nonsynonymous	Essential protein required for the DNA integrity checkpoint pathways; interacts physically with Mec1p; putative homolog of S. pombe Rad26 and human ATRIP; forms nuclear foci upon DNA replication stress
YDR499W	S000002907	LCD1	2244	4	1448364	EVO2_2_	snp	G	A	100	19	Clone variant, nonsynonymous	Essential protein required for the DNA integrity checkpoint pathways; interacts physically with Mec1p; putative homolog of S. pombe Rad26 and human ATRIP; forms nuclear foci upon DNA replication stress
YDR499W	S000002907	LCD1	2244	4	1448364	EVO2_3_	snp	G	A	100	10	Clone variant, nonsynonymous	Essential protein required for the DNA integrity checkpoint pathways; interacts physically with Mec1p; putative homolog of S. pombe Rad26 and human ATRIP; forms nuclear foci upon DNA replication stress
YGR244C	S000003476	LSC2	1284	7	979590	EVO3_1_	snp	C	G	91	11	Clone variant, promoter	Beta subunit of succinyl-CoA ligase; succinyl-CoA ligase is a mitochondrial enzyme of the TCA cycle that catalyzes the nucleotide-dependent conversion of succinyl-CoA to succinate
YGL099W	S000003067	LSG1	1923	7	316034	EVO1_9_	snp	G	T	100	20	Clone variant, nonsynonymous	Putative GTPase involved in 60S ribosomal subunit biogenesis; required for the release of Nmd3p from 60S subunits in the cytoplasm
YEL053C	S000000779	MAK10	2202	5	55745	EVO3_1_	snp	T	C	100	30	Clone variant, synonoymous	Non-catalytic subunit of the NatC N-terminal acetyltransferase; required for replication of dsRNA virus; expression is glucose-repressible; human NatC ortholog, Naa35, requires co-expression of the human catalytic subunit, Naa30, to functionally complement the null allele
YEL053C	S000000779	MAK10	2202	5	55745	EVO3_12_	snp	T	C	100	58	Clone variant, synonoymous	Non-catalytic subunit of the NatC N-terminal acetyltransferase; required for replication of dsRNA virus; expression is glucose-repressible; human NatC ortholog, Naa35, requires co-expression of the human catalytic subunit, Naa30, to functionally complement the null allele
YEL053C	S000000779	MAK10	2202	5	55745	EVO3_8_	snp	T	C	100	45	Clone variant, synonoymous	Non-catalytic subunit of the NatC N-terminal acetyltransferase; required for replication of dsRNA virus; expression is glucose-repressible; human NatC ortholog, Naa35, requires co-expression of the human catalytic subunit, Naa30, to functionally complement the null allele
YEL053C	S000000779	MAK10	2202	5	55745	EVO3_9_	snp	T	C	100	61	Clone variant, synonoymous	Non-catalytic subunit of the NatC N-terminal acetyltransferase; required for replication of dsRNA virus; expression is glucose-repressible; human NatC ortholog, Naa35, requires co-expression of the human catalytic subunit, Naa30, to functionally complement the null allele
YKL021C	S000001504	MAK11	1407	11	398180	EVO8_10_	snp	T	C	100	15	Clone variant, synonoymous	Protein involved in an early step of 60S ribosomal subunit biogenesis; essential for cell growth and replication of killer M1 dsRNA virus; contains four beta-transducin repeats
YLR244C	S000004234	MAP1	1164	12	626433	EVO4_2_	indel	G	+AAAA	100	3	Clone variant, promoter	Methionine aminopeptidase; catalyzes the cotranslational removal of N-terminal methionine from nascent polypeptides; function is partially redundant with that of Map2p
YLR163C	S000004153	MAS1	1389	12	493011	EVO3_12_	snp	C	T	97	38	Clone variant, synonoymous	Beta subunit of the mitochondrial processing protease (MPP); essential processing enzyme that cleaves the N-terminal targeting sequences from mitochondrially imported proteins
YOR298C-A	S000007253	MBF1	456	15	877095	EVO4_3_	indel	T	-A	100	2	Clone variant, other	Transcriptional coactivator; bridges the DNA-binding region of Gcn4p and TATA-binding protein Spt15p; suppressor of frameshift mutations; protein abundance increases in response to DNA replication stress
YLR106C	S000004096	MDN1	14733	12	364386	EVO1_7_	snp	G	A	100	17	Clone variant, promoter	Huge dynein-related AAA-type ATPase (midasin); forms extended pre-60S particle with the Rix1 complex; involved with interaction partners Rsa4p and Ytm1p, in the ATP-dependent remodeling of the pre-60S particle at successive maturation steps during ribosomal biogenesis; involved in the removal of biogenesis factors including GTPase Nog2p prior to nuclear export; contains a hexameric AAA-motor head…
YBR136W	S000000340	MEC1	7107	2	509583	EVO7_4_	snp	C	T	100	20	Clone variant, nonsynonymous	Genome integrity checkpoint protein and PI kinase superfamily member; Mec1p and Dun1p function in same pathway to regulate dNTP pools and telomere length; signal transducer required for cell cycle arrest and transcriptional responses to damaged or unreplicated DNA; facilitates replication fork progression and regulates P-body formation under replication stress; promotes interhomolog recombination…
YBR136W	S000000340	MEC1	7107	2	509583	EVO7_6_	snp	C	T	100	20	Clone variant, nonsynonymous	Genome integrity checkpoint protein and PI kinase superfamily member; Mec1p and Dun1p function in same pathway to regulate dNTP pools and telomere length; signal transducer required for cell cycle arrest and transcriptional responses to damaged or unreplicated DNA; facilitates replication fork progression and regulates P-body formation under replication stress; promotes interhomolog recombination…
YBR136W	S000000340	MEC1	7107	2	509583	EVO7_7_	snp	C	T	100	22	Clone variant, nonsynonymous	Genome integrity checkpoint protein and PI kinase superfamily member; Mec1p and Dun1p function in same pathway to regulate dNTP pools and telomere length; signal transducer required for cell cycle arrest and transcriptional responses to damaged or unreplicated DNA; facilitates replication fork progression and regulates P-body formation under replication stress; promotes interhomolog recombination…
YBR136W	S000000340	MEC1	7107	2	509583	EVO7_9_	snp	C	T	100	32	Clone variant, nonsynonymous	Genome integrity checkpoint protein and PI kinase superfamily member; Mec1p and Dun1p function in same pathway to regulate dNTP pools and telomere length; signal transducer required for cell cycle arrest and transcriptional responses to damaged or unreplicated DNA; facilitates replication fork progression and regulates P-body formation under replication stress; promotes interhomolog recombination…
YPR138C	S000006342	MEP3	1470	16	811236	EVO2_3_	snp	T	C	100	28	Clone variant, nonsynonymous	Ammonium permease of high capacity and low affinity; belongs to Mep-Amt-Rh family of well-conserved ammonium (NH4+) transporters that includes the human Rh factors; expression is under the nitrogen catabolite repression regulation ammonia permease activity regulated by TORC1 effectors, Npr1p and Par32p; MEP3 has a paralog, MEP1, that arose from the whole genome duplication
YFR030W	S000001926	MET10	3108	6	215982	EVO3_9_	snp	G	C	100	23	Clone variant, nonsynonymous	Subunit alpha of assimilatory sulfite reductase; complex converts sulfite into sulfide
YLR303W	S000004294	MET17	1335	12	733466	EVO5_3_	snp	G	C	100	32	Clone variant, nonsynonymous	O-acetyl homoserine-O-acetyl serine sulfhydrylase; required for Methionine and cysteine biosynthesis
YLR303W	S000004294	MET17	1335	12	733466	EVO5_4_	snp	G	C	100	36	Clone variant, nonsynonymous	O-acetyl homoserine-O-acetyl serine sulfhydrylase; required for Methionine and cysteine biosynthesis
YOL064C	S000005425	MET22	1074	15	206718	EVO5_3_	snp	C	T	100	18	Clone variant, nonsynonymous	Bisphosphate-3'-nucleotidase; involved in salt tolerance and methionine biogenesis; dephosphorylates 3'-phosphoadenosine-5'-phosphate and 3'-phosphoadenosine-5'-phosphosulfate, intermediates of the sulfate assimilation pathway; human homolog BPNT1 complements yeast null mutant
YIR017C	S000001456	MET28	564	9	383441	EVO1_12_	snp	T	C	100	14	Clone variant, other	bZIP transcriptional activator in the Cbf1p-Met4p-Met28p complex; participates in the regulation of sulfur metabolism
YKL195W	S000001678	MIA40	1212	11	76546	EVO6_1_	snp	A	G	100	5	Clone variant, nonsynonymous	Import and assembly protein in mitochondrial intermembrane space; component of MIA pathway which mediates import and oxidative folding of substrates including small proteins containing twin cysteine motifs; acts in concert with Erv1p, which oxidizes the cysteine residues of Mia40p to comprise a disulfide relay system that catalyzes import; also mediates folding of Atp23p via a chaperone-like acti…
YKL195W	S000001678	MIA40	1212	11	75385	EVO6_1_	snp	C	G	100	12	Clone variant, promoter	Import and assembly protein in mitochondrial intermembrane space; component of MIA pathway which mediates import and oxidative folding of substrates including small proteins containing twin cysteine motifs; acts in concert with Erv1p, which oxidizes the cysteine residues of Mia40p to comprise a disulfide relay system that catalyzes import; also mediates folding of Atp23p via a chaperone-like acti…
YKL195W	S000001678	MIA40	1212	11	76546	EVO6_3_	snp	A	G	100	10	Clone variant, nonsynonymous	Import and assembly protein in mitochondrial intermembrane space; component of MIA pathway which mediates import and oxidative folding of substrates including small proteins containing twin cysteine motifs; acts in concert with Erv1p, which oxidizes the cysteine residues of Mia40p to comprise a disulfide relay system that catalyzes import; also mediates folding of Atp23p via a chaperone-like acti…
YKL195W	S000001678	MIA40	1212	11	75385	EVO6_3_	snp	C	G	100	26	Clone variant, promoter	Import and assembly protein in mitochondrial intermembrane space; component of MIA pathway which mediates import and oxidative folding of substrates including small proteins containing twin cysteine motifs; acts in concert with Erv1p, which oxidizes the cysteine residues of Mia40p to comprise a disulfide relay system that catalyzes import; also mediates folding of Atp23p via a chaperone-like acti…
YKL195W	S000001678	MIA40	1212	11	76546	EVO6_5_	snp	A	G	100	25	Clone variant, nonsynonymous	Import and assembly protein in mitochondrial intermembrane space; component of MIA pathway which mediates import and oxidative folding of substrates including small proteins containing twin cysteine motifs; acts in concert with Erv1p, which oxidizes the cysteine residues of Mia40p to comprise a disulfide relay system that catalyzes import; also mediates folding of Atp23p via a chaperone-like acti…
YKL195W	S000001678	MIA40	1212	11	75385	EVO6_5_	snp	C	G	100	32	Clone variant, promoter	Import and assembly protein in mitochondrial intermembrane space; component of MIA pathway which mediates import and oxidative folding of substrates including small proteins containing twin cysteine motifs; acts in concert with Erv1p, which oxidizes the cysteine residues of Mia40p to comprise a disulfide relay system that catalyzes import; also mediates folding of Atp23p via a chaperone-like acti…
YKL195W	S000001678	MIA40	1212	11	76546	EVO6_7_	snp	A	G	100	20	Clone variant, nonsynonymous	Import and assembly protein in mitochondrial intermembrane space; component of MIA pathway which mediates import and oxidative folding of substrates including small proteins containing twin cysteine motifs; acts in concert with Erv1p, which oxidizes the cysteine residues of Mia40p to comprise a disulfide relay system that catalyzes import; also mediates folding of Atp23p via a chaperone-like acti…
YKL195W	S000001678	MIA40	1212	11	75385	EVO6_7_	snp	C	G	100	27	Clone variant, promoter	Import and assembly protein in mitochondrial intermembrane space; component of MIA pathway which mediates import and oxidative folding of substrates including small proteins containing twin cysteine motifs; acts in concert with Erv1p, which oxidizes the cysteine residues of Mia40p to comprise a disulfide relay system that catalyzes import; also mediates folding of Atp23p via a chaperone-like acti…
YPR164W	S000006368	MMS1	4224	16	872871	EVO3_12_	snp	G	T	100	30	Clone variant, nonsynonymous	Subunit of E3 ubiquitin ligase complex involved in replication repair; stabilizes protein components of the replication fork such as the fork-pausing complex and leading strand polymerase, preventing fork collapse and promoting efficient recovery during replication stress; regulates Ty1 transposition; involved with Rtt101p in nonfunctional rRNA decay
YJL186W	S000003722	MNN5	1761	10	80403	EVO2_1_	snp	T	A	100	14	Clone variant, nonsynonymous	Alpha-1,2-mannosyltransferase; responsible for addition of the second alpha-1,2-linked mannose of the branches on the mannan backbone of oligosaccharides, localizes to an early Golgi compartment
YJL186W	S000003722	MNN5	1761	10	80403	EVO2_2_	snp	T	A	100	23	Clone variant, nonsynonymous	Alpha-1,2-mannosyltransferase; responsible for addition of the second alpha-1,2-linked mannose of the branches on the mannan backbone of oligosaccharides, localizes to an early Golgi compartment
YJL186W	S000003722	MNN5	1761	10	80403	EVO2_3_	snp	T	A	100	19	Clone variant, nonsynonymous	Alpha-1,2-mannosyltransferase; responsible for addition of the second alpha-1,2-linked mannose of the branches on the mannan backbone of oligosaccharides, localizes to an early Golgi compartment
YGL124C	S000003092	MON1	1935	7	275571	EVO8_10_	snp	G	C	100	27	Clone variant, nonsynonymous	Subunit of a heterodimeric guanine nucleotide exchange factor (GEF); subunit of the Mon1-Ccz1 GEF complex which stimulates nucleotide exchange and activation of Ypt7p, a Rab family GTPase involved in membrane tethering and fusion events at the late endosome and vacuole; GEF activity is stimulated by membrane association and anionic phospholipids; role in localizing Ypt7p to the vacuolar membrane;…
YNL297C	S000005241	MON2	4911	14	76837	EVO1_9_	snp	T	G	96	24	Clone variant, promoter	Protein with a role in endocytosis and vacuole integrity; peripheral membrane protein; interacts with and negatively regulates Arl1p; localizes to the endosome; member of the Sec7p family of proteins
YNL252C	S000005196	MRPL17	846	14	172491	EVO1_3_	indel	C	+AA	100	7	Clone variant, promoter	Mitochondrial ribosomal protein of the large subunit
YMR158W	S000004767	MRPS8	468	13	572878	EVO5_3_	snp	A	T	100	25	Clone variant, other	Mitochondrial ribosomal protein of the small subunit
YMR158W	S000004767	MRPS8	468	13	572878	EVO5_4_	snp	A	T	100	31	Clone variant, other	Mitochondrial ribosomal protein of the small subunit
YDL154W	S000002313	MSH5	2706	4	180795	EVO6_7_	snp	C	T	100	40	Clone variant, nonsynonymous	Protein of the MutS family; forms a dimer with Msh4p that facilitates crossovers between homologs during meiosis; msh5-Y823H mutation confers tolerance to DNA alkylating agents; homologs present in C. elegans and humans
YDL154W	S000002313	MSH5	2706	4	180803	EVO6_7_	snp	G	A	100	31	Clone variant, nonsynonymous	Protein of the MutS family; forms a dimer with Msh4p that facilitates crossovers between homologs during meiosis; msh5-Y823H mutation confers tolerance to DNA alkylating agents; homologs present in C. elegans and humans
YMR164C	S000004774	MSS11	2277	13	587705	EVO7_4_	snp	A	G	100	5	Clone variant, nonsynonymous	Transcription factor; involved in regulation of invasive growth and starch degradation; controls the activation of FLO11 and STA2 in response to nutritional signals; forms a heterodimer with Flo8p that interacts with the Swi/Snf complex during transcriptional activation of FLO1, FLO11, and STA1
YMR164C	S000004774	MSS11	2277	13	588632	EVO7_4_	snp	C	T	77	13	Clone variant, nonsynonymous	Transcription factor; involved in regulation of invasive growth and starch degradation; controls the activation of FLO11 and STA2 in response to nutritional signals; forms a heterodimer with Flo8p that interacts with the Swi/Snf complex during transcriptional activation of FLO1, FLO11, and STA1
YMR164C	S000004774	MSS11	2277	13	587657	EVO7_9_	snp	A	G	88	8	Clone variant, nonsynonymous	Transcription factor; involved in regulation of invasive growth and starch degradation; controls the activation of FLO11 and STA2 in response to nutritional signals; forms a heterodimer with Flo8p that interacts with the Swi/Snf complex during transcriptional activation of FLO1, FLO11, and STA1
YMR164C	S000004774	MSS11	2277	13	587705	EVO8_5_	snp	A	G	100	8	Clone variant, nonsynonymous	Transcription factor; involved in regulation of invasive growth and starch degradation; controls the activation of FLO11 and STA2 in response to nutritional signals; forms a heterodimer with Flo8p that interacts with the Swi/Snf complex during transcriptional activation of FLO1, FLO11, and STA1
YDR194C	S000002602	MSS116	1995	4	846304	EVO4_3_	snp	C	T	100	27	Clone variant, nonsynonymous	Mitochondrial transcription elongation factor; DEAD-box protein; required for efficient splicing of mitochondrial Group I and II introns; non-polar RNA helicase that also facilities strand annealing; promotes RNA folding by stabilizing an early assembly intermediate
YAR033W	S000000079	MST28	705	1	188956	EVO7_7_	snp	C	G	96	26	Clone variant, other	Putative integral membrane protein, involved in vesicle formation; forms complex with Mst27p; member of DUP240 gene family; binds COPI and COPII vesicles; MST28 has a paralog, MST27, that arose from a segmental duplication
YBR255W	S000000459	MTC4	2085	2	726630	EVO1_9_	indel	C	-G	100	19	Clone variant, other	Protein of unknown function; required for normal growth rate at 15 degrees C; green fluorescent protein (GFP)-fusion protein localizes to the cytoplasm in a punctate pattern; mtc4 is synthetically sick with cdc13-1
YDR140W	S000002547	MTQ2	666	4	734753	EVO3_1_	snp	C	G	100	10	Clone variant, nonsynonymous	S-adenosylmethionine-dependent methyltransferase; subunit of complex with Trm112p that methylates translation release factor Sup45p (eRF1) in the ternary complex eRF1-eRF3-GTP; similar to E.coli PrmC; member of the seven beta-strand family
YDR140W	S000002547	MTQ2	666	4	734753	EVO3_12_	snp	C	G	100	28	Clone variant, nonsynonymous	S-adenosylmethionine-dependent methyltransferase; subunit of complex with Trm112p that methylates translation release factor Sup45p (eRF1) in the ternary complex eRF1-eRF3-GTP; similar to E.coli PrmC; member of the seven beta-strand family
YDR140W	S000002547	MTQ2	666	4	734753	EVO3_9_	snp	C	G	100	27	Clone variant, nonsynonymous	S-adenosylmethionine-dependent methyltransferase; subunit of complex with Trm112p that methylates translation release factor Sup45p (eRF1) in the ternary complex eRF1-eRF3-GTP; similar to E.coli PrmC; member of the seven beta-strand family
YOR298W	S000005824	MUM3	1440	15	877095	EVO4_3_	indel	T	-A	100	2	Clone variant, other	Protein of unknown function involved in outer spore wall organization; has similarity to the tafazzins superfamily of acyltransferases
YAL029C	S000000027	MYO4	4416	1	92741	EVO5_5_	snp	A	T	100	17	Clone variant, promoter	Type V myosin motor involved in actin-based transport of cargos; required for mRNA transport, including ASH1 mRNA, and facilitating the growth and movement of ER tubules into the growing bud along with She3p; MYO4 has a paralog, MYO2, that arose from the whole genome duplication
YML117W	S000004585	NAB6	3405	13	35025	EVO7_7_	snp	C	T	100	17	Clone variant, synonoymous	Putative RNA-binding protein; associates with mRNAs encoding cell wall proteins in high-throughput studies; deletion mutants display increased sensitivity to some cell wall disrupting agents; expression negatively regulated by cAMP
YIL048W	S000001310	NEO1	3456	9	265064	EVO2_1_	snp	A	T	100	19	Clone variant, other	Phospholipid translocase (flippase), role in phospholipid asymmetry of plasma membrane; involved in endocytosis, vacuolar biogenesis and Golgi to ER vesicle-mediated transport; localizes to endosomes and the Golgi apparatus
YHL023C	S000001015	NPR3	3441	8	58899	EVO5_11_	indel	C	-T	100	2	Clone variant, other	Subunit of the Iml1p/SEACIT complex; SEACIT (Iml1p-Npr2p-Npr3p) is a subcomplex of SEAC, a coatomer-related complex that associates dynamically with the vacuole; Npr3p may have a structural or regulatory role, supporting Iml1p function as a GAP for the Rag family GTPase Gtr1p, and leading to inhibition of TORC1 signaling in response to amino acid deprivation; SEACIT is required for non-nitrogen-s…
YNL251C	S000005195	NRD1	1728	14	172491	EVO1_3_	indel	C	+AA	100	7	Clone variant, other	RNA-binding subunit of Nrd1 complex; complex interacts with exosome to mediate 3'-end formation of some mRNAs, snRNAs, snoRNAs, and CUTs; interacts with CTD of RNA pol II large subunit Rpo21p at phosphorylated Ser5 to direct transcription termination of non-polyadenylated transcripts; H3K4 trimethylation of transcribed regions by Set1p enhances recruitment of Nrd1p to those sites; role in regulat…
YGR159C	S000003391	NSR1	1245	7	807495	EVO6_1_	snp	T	G	100	4	Clone variant, nonsynonymous	Nucleolar protein that binds nuclear localization sequences; required for pre-rRNA processing and ribosome biogenesis; binds to single stranded telomeric DNA and mRNA; methylated by Hmt1p; interaction with Top1p and nucleolar localization are negatively regulated by polyphosphorylation
YGR159C	S000003391	NSR1	1245	7	807496	EVO6_1_	snp	C	A	100	4	Clone variant, nonsynonymous	Nucleolar protein that binds nuclear localization sequences; required for pre-rRNA processing and ribosome biogenesis; binds to single stranded telomeric DNA and mRNA; methylated by Hmt1p; interaction with Top1p and nucleolar localization are negatively regulated by polyphosphorylation
YDR001C	S000002408	NTH1	2256	4	452906	EVO1_7_	snp	C	A	100	2	Clone variant, promoter	Neutral trehalase, degrades trehalose; required for thermotolerance and may mediate resistance to other cellular stresses; phosphorylated and activated by Cdc28p at the G1/S phase transition to coordinately regulate carbohydrate metabolism and the cell cycle; inhibited by Dcs1p; NTH1 has a paralog, NTH2, that arose from the whole genome duplication
YMR047C	S000004650	NUP116	3342	13	367349	EVO2_10_	snp	G	C	100	13	Clone variant, promoter	FG-nucleoporin component of central core of the nuclear pore complex; contributes directly to nucleocytoplasmic transport and maintenance of the nuclear pore complex (NPC) permeability barrier; forms a stable association with Nup82p, Gle2p and two other FG-nucleoporins (Nsp1p and Nup159p); NUP116 has a paralog, NUP100, that arose from the whole genome duplication
YJL039C	S000003576	NUP192	5052	10	369364	EVO6_7_	snp	G	A	100	20	Clone variant, synonoymous	Essential subunit of inner ring of nuclear pore complex (NPC); plays a role in modulating transport through the NPC; homologous to human NUP205
YJL061W	S000003597	NUP82	2142	10	321032	EVO3_1_	snp	G	A	100	7	Clone variant, nonsynonymous	Linker nucleoporin component of the nuclear pore complex (NPC); also part of the NPC cytoplasmic filaments; contributes to nucleocytoplasmic transport and NPC biogenesis; forms stable associations with three FG-nucleoporins (Nsp1p, Nup159p, and Nup116p); relocalizes to the cytosol in response to hypoxia
YJL061W	S000003597	NUP82	2142	10	321032	EVO3_12_	snp	G	A	100	22	Clone variant, nonsynonymous	Linker nucleoporin component of the nuclear pore complex (NPC); also part of the NPC cytoplasmic filaments; contributes to nucleocytoplasmic transport and NPC biogenesis; forms stable associations with three FG-nucleoporins (Nsp1p, Nup159p, and Nup116p); relocalizes to the cytosol in response to hypoxia
YJL061W	S000003597	NUP82	2142	10	321032	EVO3_9_	snp	G	A	100	26	Clone variant, nonsynonymous	Linker nucleoporin component of the nuclear pore complex (NPC); also part of the NPC cytoplasmic filaments; contributes to nucleocytoplasmic transport and NPC biogenesis; forms stable associations with three FG-nucleoporins (Nsp1p, Nup159p, and Nup116p); relocalizes to the cytosol in response to hypoxia
YJL212C	S000003748	OPT1	2400	10	34608	EVO5_11_	snp	G	A	100	20	Clone variant, synonoymous	Proton-coupled oligopeptide transporter of the plasma membrane; also transports glutathione and phytochelatin; member of the OPT family
YPL171C	S000006092	OYE3	1203	16	226046	EVO7_9_	snp	C	A	100	13	Clone variant, other	Conserved NADPH oxidoreductase containing flavin mononucleotide (FMN); homologous to Oye2p with different ligand binding and catalytic properties; has potential roles in oxidative stress response and programmed cell death
YDR488C	S000002896	PAC11	1602	4	1431398	EVO5_11_	snp	G	A	100	18	Clone variant, promoter	Dynein intermediate chain, microtubule motor protein; required for intracellular transport and cell division; acts in cytoplasmic dynein pathway; forms complex with dynein light chain Dyn2p that promotes Dyn1p homodimerization and potentiates motor processivity; Dyn2p-Pac11p complex is also important for interaction of dynein motor complex with dynactin complex; forms cortical cytoplasmic microtu…
YKR065C	S000001773	PAM17	594	11	565967	EVO5_5_	snp	G	A	100	14	Clone variant, promoter	Constituent of the TIM23 complex; proposed alternatively to be a component of the import motor (PAM complex) or to interact with and modulate the core TIM23 (Translocase of the Inner mitochondrial Membrane) complex; protein abundance increases in response to DNA replication stress
YLR151C	S000004141	PCD1	1023	12	441522	EVO1_9_	indel	C	+T	100	2	Clone variant, other	8-oxo-dGTP diphosphatase; prevents spontaneous mutagenesis via sanitization of oxidized purine nucleoside triphosphates; can also act as peroxisomal pyrophosphatase with specificity for coenzyme A and CoA derivatives, may function to remove potentially toxic oxidized CoA disulfide from peroxisomes to maintain the capacity for beta-oxidation of fatty acids; nudix hydrolase family member; similar E…
YDR228C	S000002636	PCF11	1881	4	923788	EVO6_1_	snp	T	G	100	10	Clone variant, nonsynonymous	mRNA 3' end processing factor; essential component of cleavage and polyadenylation factor IA (CF IA), involved in pre-mRNA 3' end processing and in transcription termination; binds C-terminal domain of largest subunit of RNA pol II (Rpo21p); required for gene looping; relocalizes to the cytosol in response to hypoxia
YKR097W	S000001805	PCK1	1650	11	632423	EVO5_3_	snp	G	T	100	26	Clone variant, nonsynonymous	Phosphoenolpyruvate carboxykinase; key enzyme in gluconeogenesis, catalyzes early reaction in carbohydrate biosynthesis, glucose represses transcription and accelerates mRNA degradation, regulated by Mcm1p and Cat8p, located in the cytosol
YKR097W	S000001805	PCK1	1650	11	632423	EVO5_4_	snp	G	T	100	44	Clone variant, nonsynonymous	Phosphoenolpyruvate carboxykinase; key enzyme in gluconeogenesis, catalyzes early reaction in carbohydrate biosynthesis, glucose represses transcription and accelerates mRNA degradation, regulated by Mcm1p and Cat8p, located in the cytosol
YMR076C	S000004681	PDS5	3834	13	419825	EVO2_1_	snp	T	G	100	30	Clone variant, nonsynonymous	Cohesion maintenance factor; involved in sister chromatid condensation and cohesion; colocalizes with cohesin on chromosomes; performs its cohesin maintenance function in pre-anaphase cells by protecting the integrity of the cohesion complex; also required during meiosis; relocalizes to the cytosol in response to hypoxia
YMR257C	S000004870	PET111	2403	13	782391	EVO4_9_	snp	C	T	100	29	Clone variant, promoter	Mitochondrial translational activator specific for the COX2 mRNA; located in the mitochondrial inner membrane
YER058W	S000000860	PET117	324	5	271169	EVO8_5_	snp	G	C	100	31	Clone variant, promoter	Assembly factor that couples heme a synthesis to complex IV assembly; regulates the oligomerization state of the Cox15p heme a synthase, and couples this to the assembly of the cytochrome C oxidase complex (complex IV)
YOR158W	S000005684	PET123	957	15	632393	EVO7_4_	snp	G	A	100	19	Clone variant, synonoymous	Mitochondrial ribosomal protein of the small subunit; PET123 exhibits genetic interactions with PET122, which encodes a COX3 mRNA-specific translational activator
YOR158W	S000005684	PET123	957	15	632393	EVO7_6_	snp	G	A	100	17	Clone variant, synonoymous	Mitochondrial ribosomal protein of the small subunit; PET123 exhibits genetic interactions with PET122, which encodes a COX3 mRNA-specific translational activator
YOR158W	S000005684	PET123	957	15	632393	EVO7_7_	snp	G	A	100	12	Clone variant, synonoymous	Mitochondrial ribosomal protein of the small subunit; PET123 exhibits genetic interactions with PET122, which encodes a COX3 mRNA-specific translational activator
YOR158W	S000005684	PET123	957	15	632393	EVO7_9_	snp	G	A	100	23	Clone variant, synonoymous	Mitochondrial ribosomal protein of the small subunit; PET123 exhibits genetic interactions with PET122, which encodes a COX3 mRNA-specific translational activator
YOR017W	S000005543	PET127	2403	15	363049	EVO3_8_	snp	A	T	100	19	Clone variant, nonsynonymous	Protein with a role in 5'-end processing of mitochondrial RNAs; located in the mitochondrial membrane
YJL023C	S000003560	PET130	1044	10	398810	EVO6_3_	snp	T	A	100	5	Clone variant, promoter	Protein of unknown function; required for efficient 5' processing of mitochondrial tRNAs, for respiratory growth and mitochondrial genome maintenance; localizes to the matrix side of the inner mitochondrial membrane
YOL147C	S000005507	PEX11	711	15	48915	EVO7_4_	snp	G	T	100	18	Clone variant, promoter	Peroxisomal protein required for medium-chain fatty acid oxidation; also required for peroxisome proliferation, possibly by inducing membrane curvature; localization regulated by phosphorylation; transcription regulated by Adr1p and Pip2p-Oaf1p
YOL147C	S000005507	PEX11	711	15	48915	EVO7_6_	snp	G	T	100	17	Clone variant, promoter	Peroxisomal protein required for medium-chain fatty acid oxidation; also required for peroxisome proliferation, possibly by inducing membrane curvature; localization regulated by phosphorylation; transcription regulated by Adr1p and Pip2p-Oaf1p
YOL147C	S000005507	PEX11	711	15	48915	EVO7_7_	snp	G	T	100	22	Clone variant, promoter	Peroxisomal protein required for medium-chain fatty acid oxidation; also required for peroxisome proliferation, possibly by inducing membrane curvature; localization regulated by phosphorylation; transcription regulated by Adr1p and Pip2p-Oaf1p
YOL147C	S000005507	PEX11	711	15	48915	EVO7_9_	snp	G	T	100	31	Clone variant, promoter	Peroxisomal protein required for medium-chain fatty acid oxidation; also required for peroxisome proliferation, possibly by inducing membrane curvature; localization regulated by phosphorylation; transcription regulated by Adr1p and Pip2p-Oaf1p
YMR026C	S000004628	PEX12	1200	13	326012	EVO6_5_	snp	G	C	100	26	Clone variant, promoter	C3HC4-type RING-finger peroxin and E3 ubiquitin ligase; required for peroxisome biogenesis and peroxisomal matrix protein import; forms translocation subcomplex with Pex2p and Pex10p; mutations in human homolog cause peroxisomal disorder
YOL084W	S000005444	PHM7	2976	15	163964	EVO4_5_	snp	C	G	100	6	Clone variant, nonsynonymous	Protein of unknown function; expression is regulated by phosphate levels; green fluorescent protein (GFP)-fusion protein localizes to the cell periphery and vacuole; protein abundance increases in response to DNA replication stress
YOL084W	S000005444	PHM7	2976	15	163101	EVO8_5_	snp	C	A	100	22	Clone variant, synonoymous	Protein of unknown function; expression is regulated by phosphate levels; green fluorescent protein (GFP)-fusion protein localizes to the cell periphery and vacuole; protein abundance increases in response to DNA replication stress
YOL011W	S000005371	PLB3	2061	15	305228	EVO5_5_	snp	A	C	100	17	Clone variant, promoter	Phospholipase B (lysophospholipase) involved in lipid metabolism; hydrolyzes phosphatidylinositol and phosphatidylserine and displays transacylase activity in vitro; PLB3 has a paralog, PLB1, that arose from the whole genome duplication
YER003C	S000000805	PMI40	1383	5	158119	EVO4_2_	snp	G	A	100	25	Clone variant, synonoymous	Mannose-6-phosphate isomerase; catalyzes the interconversion of fructose-6-P and mannose-6-P; required for early steps in protein mannosylation
YAL023C	S000000021	PMT2	2280	1	108511	EVO5_11_	snp	C	T	100	6	Clone variant, nonsynonymous	Protein O-mannosyltransferase of the ER membrane; transfers mannose residues from dolichyl phosphate-D-mannose to protein serine/threonine residues; involved in ER quality control; acts in a complex with Pmt1p, can instead interact with Pmt5p; antifungal drug target; PMT2 has a paralog, PMT3, that arose from the whole genome duplication
YJL108C	S000003644	PRM10	1152	10	217720	EVO4_3_	snp	C	G	100	18	Clone variant, nonsynonymous	Pheromone-regulated protein; proposed to be involved in mating; predicted to have 5 transmembrane segments; induced by treatment with 8-methoxypsoralen and UVA irradiation
YJL203W	S000003739	PRP21	843	10	53900	EVO5_3_	snp	G	T	100	28	Clone variant, nonsynonymous	Subunit of the SF3a splicing factor complex; required for spliceosome assembly
YJL203W	S000003739	PRP21	843	10	53466	EVO7_9_	snp	G	A	100	50	Clone variant, nonsynonymous	Subunit of the SF3a splicing factor complex; required for spliceosome assembly
YER013W	S000000815	PRP22	3438	5	181069	EVO6_1_	snp	G	C	100	9	Clone variant, nonsynonymous	DEAH-box RNA-dependent ATPase/ATP-dependent RNA helicase; associates with lariat intermediates before the second catalytic step of splicing; mediates ATP-dependent mRNA release from the spliceosome and unwinds RNA duplexes; required for proofreading the exon ligation reaction
YKL181W	S000001664	PRS1	1284	11	107522	EVO8_10_	snp	C	A	100	25	Clone variant, nonsynonymous	5-phospho-ribosyl-1(alpha)-pyrophosphate synthetase; synthesizes PRPP, which is required for nucleotide, histidine, and tryptophan biosynthesis; plays a key role in cell wall integrity (CWI) pathway; one of five related enzymes, which are active as heteromultimeric complexes; missense mutations in human homolog PRPS1 are associated with neuropathic Arts syndrome and Charcot-Marie Tooth (CMTX5) di…
YKL181W	S000001664	PRS1	1284	11	107522	EVO8_5_	snp	C	A	100	29	Clone variant, nonsynonymous	5-phospho-ribosyl-1(alpha)-pyrophosphate synthetase; synthesizes PRPP, which is required for nucleotide, histidine, and tryptophan biosynthesis; plays a key role in cell wall integrity (CWI) pathway; one of five related enzymes, which are active as heteromultimeric complexes; missense mutations in human homolog PRPS1 are associated with neuropathic Arts syndrome and Charcot-Marie Tooth (CMTX5) di…
YKL181W	S000001664	PRS1	1284	11	107522	EVO8_7_	snp	C	A	100	27	Clone variant, nonsynonymous	5-phospho-ribosyl-1(alpha)-pyrophosphate synthetase; synthesizes PRPP, which is required for nucleotide, histidine, and tryptophan biosynthesis; plays a key role in cell wall integrity (CWI) pathway; one of five related enzymes, which are active as heteromultimeric complexes; missense mutations in human homolog PRPS1 are associated with neuropathic Arts syndrome and Charcot-Marie Tooth (CMTX5) di…
YKL181W	S000001664	PRS1	1284	11	107522	EVO8_9_	snp	C	A	100	12	Clone variant, nonsynonymous	5-phospho-ribosyl-1(alpha)-pyrophosphate synthetase; synthesizes PRPP, which is required for nucleotide, histidine, and tryptophan biosynthesis; plays a key role in cell wall integrity (CWI) pathway; one of five related enzymes, which are active as heteromultimeric complexes; missense mutations in human homolog PRPS1 are associated with neuropathic Arts syndrome and Charcot-Marie Tooth (CMTX5) di…
YOR361C	S000005888	PRT1	2292	15	1017444	EVO2_10_	snp	T	C	100	13	Clone variant, nonsynonymous	eIF3b subunit of the eukaryotic translation initiation factor 3 (eIF3); subunit of the core complex of eIF3; essential for translation; part of a subcomplex (Prt1p-Rpg1p-Nip1p) that stimulates binding of mRNA and tRNA(i)Met to ribosomes; eIF3 is also involved in programmed stop codon readthrough
YDL055C	S000002213	PSA1	1086	4	356262	EVO3_1_	snp	T	G	100	5	Clone variant, nonsynonymous	GDP-mannose pyrophosphorylase (mannose-1-phosphate guanyltransferase); synthesizes GDP-mannose from GTP and mannose-1-phosphate in cell wall biosynthesis; required for normal cell wall structure
YDL055C	S000002213	PSA1	1086	4	356262	EVO3_12_	snp	T	G	100	22	Clone variant, nonsynonymous	GDP-mannose pyrophosphorylase (mannose-1-phosphate guanyltransferase); synthesizes GDP-mannose from GTP and mannose-1-phosphate in cell wall biosynthesis; required for normal cell wall structure
YDL055C	S000002213	PSA1	1086	4	356262	EVO3_8_	snp	T	G	100	12	Clone variant, nonsynonymous	GDP-mannose pyrophosphorylase (mannose-1-phosphate guanyltransferase); synthesizes GDP-mannose from GTP and mannose-1-phosphate in cell wall biosynthesis; required for normal cell wall structure
YDL055C	S000002213	PSA1	1086	4	356262	EVO3_9_	snp	T	G	100	26	Clone variant, nonsynonymous	GDP-mannose pyrophosphorylase (mannose-1-phosphate guanyltransferase); synthesizes GDP-mannose from GTP and mannose-1-phosphate in cell wall biosynthesis; required for normal cell wall structure
YDL055C	S000002213	PSA1	1086	4	356507	EVO6_1_	snp	T	A	100	7	Clone variant, nonsynonymous	GDP-mannose pyrophosphorylase (mannose-1-phosphate guanyltransferase); synthesizes GDP-mannose from GTP and mannose-1-phosphate in cell wall biosynthesis; required for normal cell wall structure
YDR013W	S000002420	PSF1	627	4	473754	EVO8_10_	snp	T	A	100	28	Clone variant, nonsynonymous	Subunit of the GINS complex (Sld5p, Psf1p, Psf2p, Psf3p); complex is localized to DNA replication origins and implicated in assembly of the DNA replication machinery
YDR013W	S000002420	PSF1	627	4	473754	EVO8_5_	snp	T	A	100	35	Clone variant, nonsynonymous	Subunit of the GINS complex (Sld5p, Psf1p, Psf2p, Psf3p); complex is localized to DNA replication origins and implicated in assembly of the DNA replication machinery
YDR013W	S000002420	PSF1	627	4	473754	EVO8_7_	snp	T	A	100	54	Clone variant, nonsynonymous	Subunit of the GINS complex (Sld5p, Psf1p, Psf2p, Psf3p); complex is localized to DNA replication origins and implicated in assembly of the DNA replication machinery
YDR013W	S000002420	PSF1	627	4	473754	EVO8_9_	snp	T	A	100	18	Clone variant, nonsynonymous	Subunit of the GINS complex (Sld5p, Psf1p, Psf2p, Psf3p); complex is localized to DNA replication origins and implicated in assembly of the DNA replication machinery
YOL146W	S000005506	PSF3	585	15	49431	EVO2_1_	snp	G	A	100	17	Clone variant, nonsynonymous	Subunit of the GINS complex (Sld5p, Psf1p, Psf2p, Psf3p); complex is localized to DNA replication origins and implicated in assembly of the DNA replication machinery
YOL146W	S000005506	PSF3	585	15	49431	EVO2_10_	snp	G	A	100	15	Clone variant, nonsynonymous	Subunit of the GINS complex (Sld5p, Psf1p, Psf2p, Psf3p); complex is localized to DNA replication origins and implicated in assembly of the DNA replication machinery
YOL146W	S000005506	PSF3	585	15	49431	EVO2_2_	snp	G	A	100	12	Clone variant, nonsynonymous	Subunit of the GINS complex (Sld5p, Psf1p, Psf2p, Psf3p); complex is localized to DNA replication origins and implicated in assembly of the DNA replication machinery
YOL146W	S000005506	PSF3	585	15	49431	EVO2_3_	snp	G	A	100	14	Clone variant, nonsynonymous	Subunit of the GINS complex (Sld5p, Psf1p, Psf2p, Psf3p); complex is localized to DNA replication origins and implicated in assembly of the DNA replication machinery
YOL146W	S000005506	PSF3	585	15	48915	EVO7_4_	snp	G	T	100	18	Clone variant, nonsynonymous	Subunit of the GINS complex (Sld5p, Psf1p, Psf2p, Psf3p); complex is localized to DNA replication origins and implicated in assembly of the DNA replication machinery
YOL146W	S000005506	PSF3	585	15	48915	EVO7_6_	snp	G	T	100	17	Clone variant, nonsynonymous	Subunit of the GINS complex (Sld5p, Psf1p, Psf2p, Psf3p); complex is localized to DNA replication origins and implicated in assembly of the DNA replication machinery
YOL146W	S000005506	PSF3	585	15	48915	EVO7_7_	snp	G	T	100	22	Clone variant, nonsynonymous	Subunit of the GINS complex (Sld5p, Psf1p, Psf2p, Psf3p); complex is localized to DNA replication origins and implicated in assembly of the DNA replication machinery
YOL146W	S000005506	PSF3	585	15	48915	EVO7_9_	snp	G	T	100	31	Clone variant, nonsynonymous	Subunit of the GINS complex (Sld5p, Psf1p, Psf2p, Psf3p); complex is localized to DNA replication origins and implicated in assembly of the DNA replication machinery
YML017W	S000004479	PSP2	2144	13	237616	EVO1_12_	snp	A	G	100	7	Clone variant, nonsynonymous	Asn rich cytoplasmic protein that contains RGG motifs; high-copy suppressor of group II intron-splicing defects of a mutation in MRS2 and of a conditional mutation in POL1 (DNA polymerase alpha); possible role in mitochondrial mRNA splicing
YDR055W	S000002462	PST1	1335	4	565018	EVO3_1_	snp	T	C	100	4	Clone variant, other	Cell wall protein that contains a putative GPI-attachment site; secreted by regenerating protoplasts; up-regulated by activation of the cell integrity pathway, as mediated by Rlm1p; upregulated by cell wall damage via disruption of FKS1; PST1 has a paralog, ECM33, that arose from the whole genome duplication
YOR090C	S000005616	PTC5	1719	15	491006	EVO6_3_	snp	G	A	83	6	Clone variant, other	Mitochondrial type 2C protein phosphatase (PP2C); involved in regulation of pyruvate dehydrogenase activity by dephosphorylating the serine 133 of the Pda1p subunit; localizes to the intermembrane space and is imported via the presequence pathway and processed by the inner membrane protease (Imp1p-Imp2p); acts in concert with kinases Pkp1p and Pkp2p and phosphatase Ptc6p
YKL198C	S000001681	PTK1	1989	11	69480	EVO4_9_	snp	A	C	100	19	Clone variant, nonsynonymous	Putative serine/threonine protein kinase; regulates spermine uptake; involved in polyamine transport; possible mitochondrial protein; PTK1 has a paralog, PTK2, that arose from the whole genome duplication
YDL230W	S000002389	PTP1	1008	4	42829	EVO8_7_	indel	T	+G	98	47	Clone variant, nonsynonymous	Phosphotyrosine-specific protein phosphatase; dephosphorylates a broad range of substrates in vivo, including Fpr3p; localized to the cytoplasm and the mitochondria; proposed to be a negative regulator of filamentation
YGL014W	S000002982	PUF4	2667	7	467194	EVO6_1_	snp	T	G	100	9	Clone variant, nonsynonymous	Member of the PUF protein family; PUF family is defined by the presence of Pumilio homology domains that confer RNA binding activity; preferentially binds mRNAs encoding nucleolar ribosomal RNA-processing factors
YGL014W	S000002982	PUF4	2667	7	467194	EVO6_3_	snp	T	G	100	14	Clone variant, nonsynonymous	Member of the PUF protein family; PUF family is defined by the presence of Pumilio homology domains that confer RNA binding activity; preferentially binds mRNAs encoding nucleolar ribosomal RNA-processing factors
YGL014W	S000002982	PUF4	2667	7	467194	EVO6_5_	snp	T	G	100	30	Clone variant, nonsynonymous	Member of the PUF protein family; PUF family is defined by the presence of Pumilio homology domains that confer RNA binding activity; preferentially binds mRNAs encoding nucleolar ribosomal RNA-processing factors
YGL014W	S000002982	PUF4	2667	7	467194	EVO6_7_	snp	T	G	100	32	Clone variant, nonsynonymous	Member of the PUF protein family; PUF family is defined by the presence of Pumilio homology domains that confer RNA binding activity; preferentially binds mRNAs encoding nucleolar ribosomal RNA-processing factors
YOR157C	S000005683	PUP1	786	15	632393	EVO7_4_	snp	G	A	100	19	Clone variant, promoter	Beta 2 subunit of the 20S proteasome; endopeptidase with trypsin-like activity that cleaves after basic residues; synthesized as a proprotein before being proteolytically processed for assembly into 20S particle; human homolog is subunit Z
YOR157C	S000005683	PUP1	786	15	632393	EVO7_6_	snp	G	A	100	17	Clone variant, promoter	Beta 2 subunit of the 20S proteasome; endopeptidase with trypsin-like activity that cleaves after basic residues; synthesized as a proprotein before being proteolytically processed for assembly into 20S particle; human homolog is subunit Z
YOR157C	S000005683	PUP1	786	15	632393	EVO7_7_	snp	G	A	100	12	Clone variant, promoter	Beta 2 subunit of the 20S proteasome; endopeptidase with trypsin-like activity that cleaves after basic residues; synthesized as a proprotein before being proteolytically processed for assembly into 20S particle; human homolog is subunit Z
YOR157C	S000005683	PUP1	786	15	632393	EVO7_9_	snp	G	A	100	23	Clone variant, promoter	Beta 2 subunit of the 20S proteasome; endopeptidase with trypsin-like activity that cleaves after basic residues; synthesized as a proprotein before being proteolytically processed for assembly into 20S particle; human homolog is subunit Z
YMR201C	S000004814	RAD14	1200	13	667077	EVO5_11_	snp	C	T	100	17	Clone variant, promoter	Protein that recognizes and binds damaged DNA during NER; subunit of Nucleotide Excision Repair Factor 1 (NEF1); contains zinc finger motif; homolog of human XPA protein; NER stands for nucleotide excision repair
YDR014W	S000002421	RAD61	1944	4	473754	EVO8_10_	snp	T	A	100	28	Clone variant, promoter	Subunit of a complex that inhibits sister chromatid cohesion; also negatively regulates chromosome condensation; inhibited by Eco1p-acetylated cohesin subunits Smc3p and Mcd1p; binds Smc3p ATPase head of cohesin; related to the human Wapl protein that controls the association of cohesin with chromatin
YDR014W	S000002421	RAD61	1944	4	473754	EVO8_5_	snp	T	A	100	35	Clone variant, promoter	Subunit of a complex that inhibits sister chromatid cohesion; also negatively regulates chromosome condensation; inhibited by Eco1p-acetylated cohesin subunits Smc3p and Mcd1p; binds Smc3p ATPase head of cohesin; related to the human Wapl protein that controls the association of cohesin with chromatin
YDR014W	S000002421	RAD61	1944	4	473754	EVO8_7_	snp	T	A	100	54	Clone variant, promoter	Subunit of a complex that inhibits sister chromatid cohesion; also negatively regulates chromosome condensation; inhibited by Eco1p-acetylated cohesin subunits Smc3p and Mcd1p; binds Smc3p ATPase head of cohesin; related to the human Wapl protein that controls the association of cohesin with chromatin
YDR014W	S000002421	RAD61	1944	4	473754	EVO8_9_	snp	T	A	100	18	Clone variant, promoter	Subunit of a complex that inhibits sister chromatid cohesion; also negatively regulates chromosome condensation; inhibited by Eco1p-acetylated cohesin subunits Smc3p and Mcd1p; binds Smc3p ATPase head of cohesin; related to the human Wapl protein that controls the association of cohesin with chromatin
YDR217C	S000002625	RAD9	3930	4	900463	EVO1_12_	snp	A	C	100	20	Clone variant, nonsynonymous	DNA damage-dependent checkpoint protein; required for cell-cycle arrest in G1/S, intra-S, and G2/M, plays a role in postreplication repair (PRR) pathway; transmits checkpoint signal by activating Rad53p and Chk1p; hyperphosphorylated by Mec1p and Tel1p; multiple cyclin dependent kinase consensus sites and the C-terminal BRCT domain contribute to DNA damage checkpoint activation; Rad9p Chk1 Activa…
YDR217C	S000002625	RAD9	3930	4	901576	EVO1_3_	indel	C	+T	96	28	Clone variant, nonsynonymous	DNA damage-dependent checkpoint protein; required for cell-cycle arrest in G1/S, intra-S, and G2/M, plays a role in postreplication repair (PRR) pathway; transmits checkpoint signal by activating Rad53p and Chk1p; hyperphosphorylated by Mec1p and Tel1p; multiple cyclin dependent kinase consensus sites and the C-terminal BRCT domain contribute to DNA damage checkpoint activation; Rad9p Chk1 Activa…
YDR217C	S000002625	RAD9	3930	4	900193	EVO1_7_	snp	C	T	100	24	Clone variant, nonsynonymous	DNA damage-dependent checkpoint protein; required for cell-cycle arrest in G1/S, intra-S, and G2/M, plays a role in postreplication repair (PRR) pathway; transmits checkpoint signal by activating Rad53p and Chk1p; hyperphosphorylated by Mec1p and Tel1p; multiple cyclin dependent kinase consensus sites and the C-terminal BRCT domain contribute to DNA damage checkpoint activation; Rad9p Chk1 Activa…
YDR217C	S000002625	RAD9	3930	4	900463	EVO1_9_	snp	A	C	100	20	Clone variant, nonsynonymous	DNA damage-dependent checkpoint protein; required for cell-cycle arrest in G1/S, intra-S, and G2/M, plays a role in postreplication repair (PRR) pathway; transmits checkpoint signal by activating Rad53p and Chk1p; hyperphosphorylated by Mec1p and Tel1p; multiple cyclin dependent kinase consensus sites and the C-terminal BRCT domain contribute to DNA damage checkpoint activation; Rad9p Chk1 Activa…
YDR217C	S000002625	RAD9	3930	4	900852	EVO4_2_	indel	A	+T	80	41	Clone variant, nonsynonymous	DNA damage-dependent checkpoint protein; required for cell-cycle arrest in G1/S, intra-S, and G2/M, plays a role in postreplication repair (PRR) pathway; transmits checkpoint signal by activating Rad53p and Chk1p; hyperphosphorylated by Mec1p and Tel1p; multiple cyclin dependent kinase consensus sites and the C-terminal BRCT domain contribute to DNA damage checkpoint activation; Rad9p Chk1 Activa…
YDR217C	S000002625	RAD9	3930	4	900852	EVO4_3_	indel	A	+T	88	17	Clone variant, nonsynonymous	DNA damage-dependent checkpoint protein; required for cell-cycle arrest in G1/S, intra-S, and G2/M, plays a role in postreplication repair (PRR) pathway; transmits checkpoint signal by activating Rad53p and Chk1p; hyperphosphorylated by Mec1p and Tel1p; multiple cyclin dependent kinase consensus sites and the C-terminal BRCT domain contribute to DNA damage checkpoint activation; Rad9p Chk1 Activa…
YDR217C	S000002625	RAD9	3930	4	900852	EVO4_5_	indel	A	+T	89	9	Clone variant, nonsynonymous	DNA damage-dependent checkpoint protein; required for cell-cycle arrest in G1/S, intra-S, and G2/M, plays a role in postreplication repair (PRR) pathway; transmits checkpoint signal by activating Rad53p and Chk1p; hyperphosphorylated by Mec1p and Tel1p; multiple cyclin dependent kinase consensus sites and the C-terminal BRCT domain contribute to DNA damage checkpoint activation; Rad9p Chk1 Activa…
YDR217C	S000002625	RAD9	3930	4	899645	EVO4_9_	snp	C	T	100	24	Clone variant, nonsynonymous	DNA damage-dependent checkpoint protein; required for cell-cycle arrest in G1/S, intra-S, and G2/M, plays a role in postreplication repair (PRR) pathway; transmits checkpoint signal by activating Rad53p and Chk1p; hyperphosphorylated by Mec1p and Tel1p; multiple cyclin dependent kinase consensus sites and the C-terminal BRCT domain contribute to DNA damage checkpoint activation; Rad9p Chk1 Activa…
YDR217C	S000002625	RAD9	3930	4	900852	EVO4_9_	indel	A	+T	83	24	Clone variant, nonsynonymous	DNA damage-dependent checkpoint protein; required for cell-cycle arrest in G1/S, intra-S, and G2/M, plays a role in postreplication repair (PRR) pathway; transmits checkpoint signal by activating Rad53p and Chk1p; hyperphosphorylated by Mec1p and Tel1p; multiple cyclin dependent kinase consensus sites and the C-terminal BRCT domain contribute to DNA damage checkpoint activation; Rad9p Chk1 Activa…
YDR217C	S000002625	RAD9	3930	4	900852	EVO5_11_	indel	A	+T	86	7	Clone variant, nonsynonymous	DNA damage-dependent checkpoint protein; required for cell-cycle arrest in G1/S, intra-S, and G2/M, plays a role in postreplication repair (PRR) pathway; transmits checkpoint signal by activating Rad53p and Chk1p; hyperphosphorylated by Mec1p and Tel1p; multiple cyclin dependent kinase consensus sites and the C-terminal BRCT domain contribute to DNA damage checkpoint activation; Rad9p Chk1 Activa…
YDR217C	S000002625	RAD9	3930	4	900852	EVO5_3_	indel	A	+T	88	16	Clone variant, nonsynonymous	DNA damage-dependent checkpoint protein; required for cell-cycle arrest in G1/S, intra-S, and G2/M, plays a role in postreplication repair (PRR) pathway; transmits checkpoint signal by activating Rad53p and Chk1p; hyperphosphorylated by Mec1p and Tel1p; multiple cyclin dependent kinase consensus sites and the C-terminal BRCT domain contribute to DNA damage checkpoint activation; Rad9p Chk1 Activa…
YDR217C	S000002625	RAD9	3930	4	900852	EVO5_4_	indel	A	+T	77	26	Clone variant, nonsynonymous	DNA damage-dependent checkpoint protein; required for cell-cycle arrest in G1/S, intra-S, and G2/M, plays a role in postreplication repair (PRR) pathway; transmits checkpoint signal by activating Rad53p and Chk1p; hyperphosphorylated by Mec1p and Tel1p; multiple cyclin dependent kinase consensus sites and the C-terminal BRCT domain contribute to DNA damage checkpoint activation; Rad9p Chk1 Activa…
YDR217C	S000002625	RAD9	3930	4	900852	EVO5_5_	indel	A	+T	95	20	Clone variant, nonsynonymous	DNA damage-dependent checkpoint protein; required for cell-cycle arrest in G1/S, intra-S, and G2/M, plays a role in postreplication repair (PRR) pathway; transmits checkpoint signal by activating Rad53p and Chk1p; hyperphosphorylated by Mec1p and Tel1p; multiple cyclin dependent kinase consensus sites and the C-terminal BRCT domain contribute to DNA damage checkpoint activation; Rad9p Chk1 Activa…
YDR217C	S000002625	RAD9	3930	4	900852	EVO6_3_	indel	A	+T	87	30	Clone variant, nonsynonymous	DNA damage-dependent checkpoint protein; required for cell-cycle arrest in G1/S, intra-S, and G2/M, plays a role in postreplication repair (PRR) pathway; transmits checkpoint signal by activating Rad53p and Chk1p; hyperphosphorylated by Mec1p and Tel1p; multiple cyclin dependent kinase consensus sites and the C-terminal BRCT domain contribute to DNA damage checkpoint activation; Rad9p Chk1 Activa…
YDR217C	S000002625	RAD9	3930	4	900852	EVO6_5_	indel	A	+T	77	26	Clone variant, nonsynonymous	DNA damage-dependent checkpoint protein; required for cell-cycle arrest in G1/S, intra-S, and G2/M, plays a role in postreplication repair (PRR) pathway; transmits checkpoint signal by activating Rad53p and Chk1p; hyperphosphorylated by Mec1p and Tel1p; multiple cyclin dependent kinase consensus sites and the C-terminal BRCT domain contribute to DNA damage checkpoint activation; Rad9p Chk1 Activa…
YDR217C	S000002625	RAD9	3930	4	900852	EVO6_7_	indel	A	+T	88	16	Clone variant, nonsynonymous	DNA damage-dependent checkpoint protein; required for cell-cycle arrest in G1/S, intra-S, and G2/M, plays a role in postreplication repair (PRR) pathway; transmits checkpoint signal by activating Rad53p and Chk1p; hyperphosphorylated by Mec1p and Tel1p; multiple cyclin dependent kinase consensus sites and the C-terminal BRCT domain contribute to DNA damage checkpoint activation; Rad9p Chk1 Activa…
YDR527W	S000002935	RBA50	1320	4	1490717	EVO5_5_	snp	G	C	100	17	Clone variant, promoter	Protein involved in transcription; interacts with RNA polymerase II subunits Rpb2p, Rpb3, and Rpb11p; has similarity to human RPAP1
YJL204C	S000003740	RCY1	2523	10	53900	EVO5_3_	snp	G	T	100	28	Clone variant, promoter	F-box protein involved in recycling endocytosed proteins; involved in recycling plasma membrane proteins internalized by endocytosis; localized to sites of polarized growth; direct interaction with C-terminal cytoplasmic region of Drs2p plays an important role for Drs2p function in endocytic recycling pathway
YJL204C	S000003740	RCY1	2523	10	53466	EVO7_9_	snp	G	A	100	50	Clone variant, promoter	F-box protein involved in recycling endocytosed proteins; involved in recycling plasma membrane proteins internalized by endocytosis; localized to sites of polarized growth; direct interaction with C-terminal cytoplasmic region of Drs2p plays an important role for Drs2p function in endocytic recycling pathway
YBR073W	S000000277	RDH54	2877	2	384174	EVO8_10_	snp	T	A	100	12	Clone variant, synonoymous	DNA-dependent ATPase; DNA recombination/repair translocase, supercoils DNA and promotes DNA strand opening; stimulates strand exchange by modifying dsDNA topology; involved in recombinational repair of DNA double-strand breaks (DSBs) during mitosis and meiosis; phosphorylated in Mec1p-, Rad53p-dependent way in response to one DSB; contributes to remodelling of nucleosomes; proposed to be involved…
YBR073W	S000000277	RDH54	2877	2	384174	EVO8_5_	snp	T	A	100	23	Clone variant, synonoymous	DNA-dependent ATPase; DNA recombination/repair translocase, supercoils DNA and promotes DNA strand opening; stimulates strand exchange by modifying dsDNA topology; involved in recombinational repair of DNA double-strand breaks (DSBs) during mitosis and meiosis; phosphorylated in Mec1p-, Rad53p-dependent way in response to one DSB; contributes to remodelling of nucleosomes; proposed to be involved…
YBR073W	S000000277	RDH54	2877	2	384174	EVO8_7_	snp	T	A	100	30	Clone variant, synonoymous	DNA-dependent ATPase; DNA recombination/repair translocase, supercoils DNA and promotes DNA strand opening; stimulates strand exchange by modifying dsDNA topology; involved in recombinational repair of DNA double-strand breaks (DSBs) during mitosis and meiosis; phosphorylated in Mec1p-, Rad53p-dependent way in response to one DSB; contributes to remodelling of nucleosomes; proposed to be involved…
YBR073W	S000000277	RDH54	2877	2	384174	EVO8_9_	snp	T	A	100	11	Clone variant, synonoymous	DNA-dependent ATPase; DNA recombination/repair translocase, supercoils DNA and promotes DNA strand opening; stimulates strand exchange by modifying dsDNA topology; involved in recombinational repair of DNA double-strand breaks (DSBs) during mitosis and meiosis; phosphorylated in Mec1p-, Rad53p-dependent way in response to one DSB; contributes to remodelling of nucleosomes; proposed to be involved…
YLR107W	S000004097	REX3	1215	12	364386	EVO1_7_	snp	G	A	100	17	Clone variant, nonsynonymous	RNA exonuclease; required for maturation of the RNA component of RNase MRP; functions redundantly with Rnh70p and Rex2p in processing of U5 snRNA and RNase P RNA; member of RNase D family of exonucleases
YOR217W	S000005743	RFC1	2586	15	749144	EVO8_5_	indel	G	+A	76	25	Clone variant, promoter	Subunit of heteropentameric Replication factor C (RF-C); RF-C is a DNA binding protein and ATPase that acts as a clamp loader of the proliferating cell nuclear antigen (PCNA) processivity factor for DNA polymerases delta and epsilon
YBL020W	S000000116	RFT1	1725	2	182141	EVO6_1_	snp	G	A	100	9	Clone variant, promoter	Membrane protein required for translocation of Man5GlcNac2-PP-Dol; required for translocation of Man5GlcNac2-PP-Dol from the cytoplasmic side to the lumenal side of the ER membrane but is not the flippase; mutation is suppressed by expression of human p53 protein; essential gene
YBL020W	S000000116	RFT1	1725	2	182141	EVO6_7_	snp	G	A	100	21	Clone variant, promoter	Membrane protein required for translocation of Man5GlcNac2-PP-Dol; required for translocation of Man5GlcNac2-PP-Dol from the cytoplasmic side to the lumenal side of the ER membrane but is not the flippase; mutation is suppressed by expression of human p53 protein; essential gene
YHL024W	S000001016	RIM4	2142	8	58899	EVO5_11_	indel	C	-T	100	2	Clone variant, other	Putative RNA-binding protein; required for the expression of early and middle sporulation genes
YLL034C	S000003957	RIX7	2514	12	70712	EVO1_12_	snp	C	A	100	17	Clone variant, nonsynonymous	Putative ATPase of the AAA family; required for export of pre-ribosomal large subunits from the nucleus; distributed between the nucleolus, nucleoplasm, and nuclear periphery depending on growth conditions
YLL034C	S000003957	RIX7	2514	12	70712	EVO1_9_	snp	C	A	100	14	Clone variant, nonsynonymous	Putative ATPase of the AAA family; required for export of pre-ribosomal large subunits from the nucleus; distributed between the nucleolus, nucleoplasm, and nuclear periphery depending on growth conditions
YPR018W	S000006222	RLF2	1821	16	595854	EVO5_5_	snp	A	G	100	16	Clone variant, synonoymous	Largest subunit (p90) of the Chromatin Assembly Complex (CAF-1); chromatin assembly by CAF-1 is important for multiple processes including silencing at telomeres, mating type loci, and rDNA; maintenance of kinetochore structure; deactivation of the DNA damage checkpoint after DNA repair; chromatin dynamics during transcription; and repression of divergent noncoding transcription
YOL005C	S000005365	RPB11	363	15	315629	EVO2_3_	snp	C	T	100	3	Clone variant, other	RNA polymerase II subunit B12.5; part of central core; similar to Rpc19p and bacterial alpha subunit
YLR075W	S000004065	RPL10	666	12	282683	EVO8_9_	indel	A	-T	91	11	Clone variant, promoter	Ribosomal 60S subunit protein L10; homologous to mammalian ribosomal protein L10 and bacterial L16; responsible for joining the 40S and 60S subunits; regulates translation initiation; similar to members of the QM gene family; protein abundance increases under DNA replication stress; mutations in human homolog implicated in T-cell acute lymphoblastic leukemia and also autism spectrum disorders (AS…
YIL133C	S000001395	RPL16A	890	9	99817	EVO3_9_	snp	G	A	100	39	Clone variant, promoter	Ribosomal 60S subunit protein L16A; N-terminally acetylated, binds 5.8 S rRNA; transcriptionally regulated by Rap1p; homologous to mammalian ribosomal protein L13A and bacterial L13; RPL16A has a paralog, RPL16B, that arose from the whole genome duplication; protein abundance increases in response to DNA replication stress
YPL220W	S000006141	RPL1A	654	16	135700	EVO6_3_	snp	C	G	100	13	Clone variant, promoter	Ribosomal 60S subunit protein L1A; N-terminally acetylated; homologous to mammalian ribosomal protein L10A and bacterial L1; RPL1A has a paralog, RPL1B, that arose from the whole genome duplication; rpl1a rpl1b double null mutation is lethal
YPL143W	S000006064	RPL33A	849	16	281537	EVO5_3_	snp	C	T	100	17	Clone variant, promoter	Ribosomal 60S subunit protein L33A; N-terminally acetylated; rpl33a null mutant exhibits slow growth while rpl33a rpl33b double null mutant is inviable; homologous to mammalian ribosomal protein L35A, no bacterial homolog; RPL33A has a paralog, RPL33B, that arose from the whole genome duplication
YPL143W	S000006064	RPL33A	849	16	281537	EVO5_4_	snp	C	T	100	29	Clone variant, promoter	Ribosomal 60S subunit protein L33A; N-terminally acetylated; rpl33a null mutant exhibits slow growth while rpl33a rpl33b double null mutant is inviable; homologous to mammalian ribosomal protein L35A, no bacterial homolog; RPL33A has a paralog, RPL33B, that arose from the whole genome duplication
YPL143W	S000006064	RPL33A	849	16	281537	EVO5_5_	snp	C	T	100	14	Clone variant, promoter	Ribosomal 60S subunit protein L33A; N-terminally acetylated; rpl33a null mutant exhibits slow growth while rpl33a rpl33b double null mutant is inviable; homologous to mammalian ribosomal protein L35A, no bacterial homolog; RPL33A has a paralog, RPL33B, that arose from the whole genome duplication
YJL189W	S000003725	RPL39	542	10	75517	EVO3_1_	snp	G	C	100	4	Clone variant, promoter	Ribosomal 60S subunit protein L39; required for ribosome biogenesis; loss of both Rpl31p and Rpl39p confers lethality; also exhibits genetic interactions with SIS1 and PAB1; homologous to mammalian ribosomal protein L39, no bacterial homolog
YJL189W	S000003725	RPL39	542	10	75517	EVO3_12_	snp	G	C	100	24	Clone variant, promoter	Ribosomal 60S subunit protein L39; required for ribosome biogenesis; loss of both Rpl31p and Rpl39p confers lethality; also exhibits genetic interactions with SIS1 and PAB1; homologous to mammalian ribosomal protein L39, no bacterial homolog
YJL189W	S000003725	RPL39	542	10	75517	EVO3_8_	snp	G	C	100	12	Clone variant, promoter	Ribosomal 60S subunit protein L39; required for ribosome biogenesis; loss of both Rpl31p and Rpl39p confers lethality; also exhibits genetic interactions with SIS1 and PAB1; homologous to mammalian ribosomal protein L39, no bacterial homolog
YJL189W	S000003725	RPL39	542	10	75517	EVO3_9_	snp	G	C	100	15	Clone variant, promoter	Ribosomal 60S subunit protein L39; required for ribosome biogenesis; loss of both Rpl31p and Rpl39p confers lethality; also exhibits genetic interactions with SIS1 and PAB1; homologous to mammalian ribosomal protein L39, no bacterial homolog
YGL076C	S000003044	RPL7A	1662	7	365506	EVO1_12_	snp	A	T	100	12	Clone variant, nonsynonymous	Ribosomal 60S subunit protein L7A; required for processing of 27SA3 pre-rRNA to 27SB pre-rRNA during assembly of large ribosomal subunit; depletion leads to a turnover of pre-rRNA; contains a conserved C-terminal Nucleic acid Binding Domain (NDB2); binds to Domain II of 25S and 5.8S rRNAs; homologous to mammalian ribosomal protein L7 and bacterial L30; RPL7A has a paralog, RPL7B, that arose from …
YGL076C	S000003044	RPL7A	1662	7	365506	EVO1_9_	snp	A	T	100	7	Clone variant, nonsynonymous	Ribosomal 60S subunit protein L7A; required for processing of 27SA3 pre-rRNA to 27SB pre-rRNA during assembly of large ribosomal subunit; depletion leads to a turnover of pre-rRNA; contains a conserved C-terminal Nucleic acid Binding Domain (NDB2); binds to Domain II of 25S and 5.8S rRNAs; homologous to mammalian ribosomal protein L7 and bacterial L30; RPL7A has a paralog, RPL7B, that arose from …
YLR421C	S000004413	RPN13	471	12	965428	EVO7_4_	snp	T	C	100	19	Clone variant, synonoymous	Subunit of the 19S regulatory particle of the 26S proteasome lid; acts as a ubiquitin receptor for the proteasome; null mutants accumulate ubiquitinated Gcn4p and display decreased 26S proteasome stability; protein abundance increases in response to DNA replication stress
YLR421C	S000004413	RPN13	471	12	965428	EVO7_6_	snp	T	C	100	9	Clone variant, synonoymous	Subunit of the 19S regulatory particle of the 26S proteasome lid; acts as a ubiquitin receptor for the proteasome; null mutants accumulate ubiquitinated Gcn4p and display decreased 26S proteasome stability; protein abundance increases in response to DNA replication stress
YLR421C	S000004413	RPN13	471	12	965428	EVO7_7_	snp	T	C	100	11	Clone variant, synonoymous	Subunit of the 19S regulatory particle of the 26S proteasome lid; acts as a ubiquitin receptor for the proteasome; null mutants accumulate ubiquitinated Gcn4p and display decreased 26S proteasome stability; protein abundance increases in response to DNA replication stress
YLR421C	S000004413	RPN13	471	12	965428	EVO7_9_	snp	T	C	100	32	Clone variant, synonoymous	Subunit of the 19S regulatory particle of the 26S proteasome lid; acts as a ubiquitin receptor for the proteasome; null mutants accumulate ubiquitinated Gcn4p and display decreased 26S proteasome stability; protein abundance increases in response to DNA replication stress
YPR108W	S000006312	RPN7	1290	16	743632	EVO2_1_	snp	G	A	100	32	Clone variant, nonsynonymous	Essential non-ATPase regulatory subunit of the 26S proteasome; similar to another S. cerevisiae regulatory subunit, Rpn5p, as well as to mammalian proteasome subunits
YOR293W	S000005819	RPS10A	755	15	867859	EVO3_1_	snp	G	A	100	10	Clone variant, other	Protein component of the small (40S) ribosomal subunit; homologous to mammalian ribosomal protein S10, no bacterial homolog; RPS10A has a paralog, RPS10B, that arose from the whole genome duplication; mutations in the human homolog associated with Diamond-Blackfan anemia
YLR441C	S000004433	RPS1A	768	12	1019595	EVO1_9_	snp	C	A	100	19	Clone variant, promoter	Ribosomal protein of the small (40S) subunit; homologous to mammalian ribosomal protein S3A, no bacterial homolog; RPS1A has a paralog, RPS1B, that arose from the whole genome duplication
YJL190C	S000003726	RPS22A	393	10	75517	EVO3_1_	snp	G	C	100	4	Clone variant, promoter	Protein component of the small (40S) ribosomal subunit; homologous to mammalian ribosomal protein S15A and bacterial S8; RPS22A has a paralog, RPS22B, that arose from the whole genome duplication
YJL190C	S000003726	RPS22A	393	10	75517	EVO3_12_	snp	G	C	100	24	Clone variant, promoter	Protein component of the small (40S) ribosomal subunit; homologous to mammalian ribosomal protein S15A and bacterial S8; RPS22A has a paralog, RPS22B, that arose from the whole genome duplication
YJL190C	S000003726	RPS22A	393	10	75517	EVO3_8_	snp	G	C	100	12	Clone variant, promoter	Protein component of the small (40S) ribosomal subunit; homologous to mammalian ribosomal protein S15A and bacterial S8; RPS22A has a paralog, RPS22B, that arose from the whole genome duplication
YJL190C	S000003726	RPS22A	393	10	75517	EVO3_9_	snp	G	C	100	15	Clone variant, promoter	Protein component of the small (40S) ribosomal subunit; homologous to mammalian ribosomal protein S15A and bacterial S8; RPS22A has a paralog, RPS22B, that arose from the whole genome duplication
YLR264W	S000004254	RPS28B	204	12	673374	EVO1_12_	indel	T	-G	80	10	Clone variant, other	Protein component of the small (40S) ribosomal subunit; homologous to mammalian ribosomal protein S28, no bacterial homolog; has an extraribosomal function in autoregulation, in which Rps28Bp binds to a decapping complex via Edc3p, which then binds to RPS28B mRNA leading to its decapping and degradation; RPS28B has a paralog, RPS28A, that arose from the whole genome duplication
YLR264W	S000004254	RPS28B	204	12	673374	EVO1_3_	indel	T	-G	80	10	Clone variant, other	Protein component of the small (40S) ribosomal subunit; homologous to mammalian ribosomal protein S28, no bacterial homolog; has an extraribosomal function in autoregulation, in which Rps28Bp binds to a decapping complex via Edc3p, which then binds to RPS28B mRNA leading to its decapping and degradation; RPS28B has a paralog, RPS28A, that arose from the whole genome duplication
YLR264W	S000004254	RPS28B	204	12	673374	EVO2_1_	indel	T	-G	100	4	Clone variant, other	Protein component of the small (40S) ribosomal subunit; homologous to mammalian ribosomal protein S28, no bacterial homolog; has an extraribosomal function in autoregulation, in which Rps28Bp binds to a decapping complex via Edc3p, which then binds to RPS28B mRNA leading to its decapping and degradation; RPS28B has a paralog, RPS28A, that arose from the whole genome duplication
YLR264W	S000004254	RPS28B	204	12	673374	EVO2_3_	indel	T	-G	100	4	Clone variant, other	Protein component of the small (40S) ribosomal subunit; homologous to mammalian ribosomal protein S28, no bacterial homolog; has an extraribosomal function in autoregulation, in which Rps28Bp binds to a decapping complex via Edc3p, which then binds to RPS28B mRNA leading to its decapping and degradation; RPS28B has a paralog, RPS28A, that arose from the whole genome duplication
YLR264W	S000004254	RPS28B	204	12	673374	EVO3_12_	indel	T	-G	100	4	Clone variant, other	Protein component of the small (40S) ribosomal subunit; homologous to mammalian ribosomal protein S28, no bacterial homolog; has an extraribosomal function in autoregulation, in which Rps28Bp binds to a decapping complex via Edc3p, which then binds to RPS28B mRNA leading to its decapping and degradation; RPS28B has a paralog, RPS28A, that arose from the whole genome duplication
YLR264W	S000004254	RPS28B	204	12	673374	EVO3_8_	indel	T	-G	100	4	Clone variant, other	Protein component of the small (40S) ribosomal subunit; homologous to mammalian ribosomal protein S28, no bacterial homolog; has an extraribosomal function in autoregulation, in which Rps28Bp binds to a decapping complex via Edc3p, which then binds to RPS28B mRNA leading to its decapping and degradation; RPS28B has a paralog, RPS28A, that arose from the whole genome duplication
YLR264W	S000004254	RPS28B	204	12	673374	EVO3_9_	indel	T	-G	100	4	Clone variant, other	Protein component of the small (40S) ribosomal subunit; homologous to mammalian ribosomal protein S28, no bacterial homolog; has an extraribosomal function in autoregulation, in which Rps28Bp binds to a decapping complex via Edc3p, which then binds to RPS28B mRNA leading to its decapping and degradation; RPS28B has a paralog, RPS28A, that arose from the whole genome duplication
YLR264W	S000004254	RPS28B	204	12	673374	EVO4_2_	indel	T	-G	88	8	Clone variant, other	Protein component of the small (40S) ribosomal subunit; homologous to mammalian ribosomal protein S28, no bacterial homolog; has an extraribosomal function in autoregulation, in which Rps28Bp binds to a decapping complex via Edc3p, which then binds to RPS28B mRNA leading to its decapping and degradation; RPS28B has a paralog, RPS28A, that arose from the whole genome duplication
YLR264W	S000004254	RPS28B	204	12	673374	EVO4_3_	indel	T	-G	100	9	Clone variant, other	Protein component of the small (40S) ribosomal subunit; homologous to mammalian ribosomal protein S28, no bacterial homolog; has an extraribosomal function in autoregulation, in which Rps28Bp binds to a decapping complex via Edc3p, which then binds to RPS28B mRNA leading to its decapping and degradation; RPS28B has a paralog, RPS28A, that arose from the whole genome duplication
YLR264W	S000004254	RPS28B	204	12	673374	EVO4_9_	indel	T	-G	88	8	Clone variant, other	Protein component of the small (40S) ribosomal subunit; homologous to mammalian ribosomal protein S28, no bacterial homolog; has an extraribosomal function in autoregulation, in which Rps28Bp binds to a decapping complex via Edc3p, which then binds to RPS28B mRNA leading to its decapping and degradation; RPS28B has a paralog, RPS28A, that arose from the whole genome duplication
YGR095C	S000003327	RRP46	672	7	675527	EVO1_3_	snp	T	C	100	6	Clone variant, other	Exosome non-catalytic core component; involved in 3'-5' RNA processing and degradation in both the nucleus and the cytoplasm; has similarity to E. coli RNase PH and to human hRrp46p (EXOSC5)
YGR095C	S000003327	RRP46	672	7	675527	EVO2_2_	snp	T	C	100	11	Clone variant, other	Exosome non-catalytic core component; involved in 3'-5' RNA processing and degradation in both the nucleus and the cytoplasm; has similarity to E. coli RNase PH and to human hRrp46p (EXOSC5)
YGR095C	S000003327	RRP46	672	7	675527	EVO3_1_	snp	T	C	86	7	Clone variant, other	Exosome non-catalytic core component; involved in 3'-5' RNA processing and degradation in both the nucleus and the cytoplasm; has similarity to E. coli RNase PH and to human hRrp46p (EXOSC5)
YGR095C	S000003327	RRP46	672	7	675527	EVO5_11_	snp	T	C	100	5	Clone variant, other	Exosome non-catalytic core component; involved in 3'-5' RNA processing and degradation in both the nucleus and the cytoplasm; has similarity to E. coli RNase PH and to human hRrp46p (EXOSC5)
YGR095C	S000003327	RRP46	672	7	675527	EVO5_5_	snp	T	C	100	7	Clone variant, other	Exosome non-catalytic core component; involved in 3'-5' RNA processing and degradation in both the nucleus and the cytoplasm; has similarity to E. coli RNase PH and to human hRrp46p (EXOSC5)
YGR095C	S000003327	RRP46	672	7	675891	EVO6_3_	snp	C	T	100	25	Clone variant, nonsynonymous	Exosome non-catalytic core component; involved in 3'-5' RNA processing and degradation in both the nucleus and the cytoplasm; has similarity to E. coli RNase PH and to human hRrp46p (EXOSC5)
YOR294W	S000005820	RRS1	612	15	867859	EVO3_1_	snp	G	A	100	10	Clone variant, promoter	Essential protein that binds ribosomal protein L11; required for nuclear export of the 60S pre-ribosomal subunit during ribosome biogenesis; localizes to the nucleolus and in foci along nuclear periphery; cooperates with Ebp2p and Mps3p to mediate telomere clustering by binding Sir4p, but is not involved in telomere tethering; mouse homolog shows altered expression in Huntington's disease model m…
YOR216C	S000005742	RUD3	1455	15	749144	EVO8_5_	indel	G	+A	76	25	Clone variant, promoter	Golgi matrix protein; involved in the structural organization of the cis-Golgi; interacts genetically with COG3 and USO1
YBR235W	S000000439	S000000439	3363	2	689695	EVO3_1_	snp	G	A	100	14	Clone variant, nonsynonymous	Vacuolar membrane cation-chloride cotransporter (CCC); likely mediates K+ and Cl- cotransport into the vacuole; has a role in potassium homeostasis and salt tolerance; localizes to sites of contact between the vacuole and mitochondria (vCLAMPs); similar to mammalian electroneutral Na(+)-(K+)-C1- cotransporter family
YER071C	S000000873	S000000873	381	5	302122	EVO4_3_	snp	C	A	100	19	Clone variant, nonsynonymous	Subunit of a complex that associates with actin filaments; forms a complex with Aim21p that inhibits barbed end F-actin assembly; elevates actin monomer pools to increase endocytotic efficiency and to regulate the distribution of actin between cables and patches; Aim21p/Tda2p forms a larger complex with actin capping proteins Cap1p and Cap2p; TcTex1-type dynein light chain family member; null mut…
YER140W	S000000942	S000000942	1671	5	453407	EVO7_9_	snp	A	G	100	43	Clone variant, other	Integral membrane protein of the ER; forms an ER-membrane associated protein complex with Slp1p; identified along with SLP1 in a screen for mutants defective in the unfolded protein response (UPR); proposed to function in the folding of integral membrane proteins; interacts genetically with MPS3; the authentic, non-tagged protein is detected in highly purified mitochondria in high-throughput stud…
YIL108W	S000001370	S000001370	2091	9	160891	EVO7_4_	snp	A	T	100	24	Clone variant, synonoymous	Putative metalloendopeptidase; forms cytoplasmic foci upon DNA replication stress
YIL108W	S000001370	S000001370	2091	9	160891	EVO7_6_	snp	A	T	100	12	Clone variant, synonoymous	Putative metalloendopeptidase; forms cytoplasmic foci upon DNA replication stress
YIL108W	S000001370	S000001370	2091	9	160891	EVO7_7_	snp	A	T	100	15	Clone variant, synonoymous	Putative metalloendopeptidase; forms cytoplasmic foci upon DNA replication stress
YIL108W	S000001370	S000001370	2091	9	160891	EVO7_9_	snp	A	T	100	33	Clone variant, synonoymous	Putative metalloendopeptidase; forms cytoplasmic foci upon DNA replication stress
YKR043C	S000001751	S000001751	816	11	522116	EVO1_12_	snp	G	T	97	31	Clone variant, promoter	Sedoheptulose bisphosphatase involved in riboneogenesis; dephosphorylates sedoheptulose 1,7-bisphosphate, which is converted via the nonoxidative pentose phosphate pathway to ribose-5-phosphate; facilitates the conversion of glycolytic intermediates to pentose phosphate units; also has fructose 1,6-bisphosphatase activity but this is probably not biologically relevant, since deletion does not aff…
YKR096W	S000001804	S000001804	3588	11	627561	EVO1_9_	snp	G	T	95	19	Clone variant, nonsynonymous	hEST1A/B (SMG5/6)-like protein; contributes to environment-sensing adaptive gene expression responses; Esl2p and Esl1p contain a 14-3-3-like domain and a putative PilT N-terminus ribonuclease domain; interacts with Pex14p; may interact with ribosomes, based on co-purification experiments; green fluorescent protein (GFP)-fusion protein localizes to the nucleus and cytoplasm; ESL2 has a paralog, ES…
YDL063C	S000002221	S000002221	1863	4	339776	EVO5_11_	snp	C	A	100	12	Clone variant, nonsynonymous	Transport adaptor or symportin; facilitates synchronized nuclear coimport of the two 5S-rRNA binding proteins Rpl5p and Rpl11p; binds to nascent Rpl5p during translation; required for biogenesis of the large ribosomal subunit; green fluorescent protein (GFP)-fusion protein localizes to the cytoplasm and nucleus
YDR186C	S000002594	S000002594	2634	4	834925	EVO5_5_	indel	A	-G	95	19	Clone variant, nonsynonymous	Protein involved in SRP-independent targeting of substrates to the ER; component of an alternative ER targeting pathway that has partial functional redundancy with the GET pathway; preference for substrates with downstream transmembrane domains; interacts with Env10p/Snd2p and Pho88p/Snd3p; can compensate for loss of SRP; may interact with ribosomes, based on co-purification experiments; GFP-fusi…
YDR186C	S000002594	S000002594	2634	4	834927	EVO5_5_	snp	A	C	100	18	Clone variant, nonsynonymous	Protein involved in SRP-independent targeting of substrates to the ER; component of an alternative ER targeting pathway that has partial functional redundancy with the GET pathway; preference for substrates with downstream transmembrane domains; interacts with Env10p/Snd2p and Pho88p/Snd3p; can compensate for loss of SRP; may interact with ribosomes, based on co-purification experiments; GFP-fusi…
YGR207C	S000003439	S000003439	786	7	912248	EVO7_4_	snp	G	A	100	27	Clone variant, promoter	Mitochondrial protein that interacts with frataxin (Yfh1p); putative ortholog of mammalian electron transfer flavoprotein complex subunit ETF-beta; may have a role in oxidative stress response
YGR207C	S000003439	S000003439	786	7	912248	EVO7_6_	snp	G	A	100	14	Clone variant, promoter	Mitochondrial protein that interacts with frataxin (Yfh1p); putative ortholog of mammalian electron transfer flavoprotein complex subunit ETF-beta; may have a role in oxidative stress response
YGR207C	S000003439	S000003439	786	7	912248	EVO7_7_	snp	G	A	94	33	Clone variant, promoter	Mitochondrial protein that interacts with frataxin (Yfh1p); putative ortholog of mammalian electron transfer flavoprotein complex subunit ETF-beta; may have a role in oxidative stress response
YGR207C	S000003439	S000003439	786	7	912248	EVO7_9_	snp	G	A	100	35	Clone variant, promoter	Mitochondrial protein that interacts with frataxin (Yfh1p); putative ortholog of mammalian electron transfer flavoprotein complex subunit ETF-beta; may have a role in oxidative stress response
YLR162W	S000004152	S000004152	357	12	489464	EVO1_3_	indel	A	-AT	100	5	Clone variant, promoter	Protein of unknown function; overexpression confers resistance to the antimicrobial peptide MiAMP1 and causes growth arrest, apoptosis, and increased sensitivity to cobalt chloride
YLR162W	S000004152	S000004152	357	12	489470	EVO1_3_	snp	T	G	100	5	Clone variant, promoter	Protein of unknown function; overexpression confers resistance to the antimicrobial peptide MiAMP1 and causes growth arrest, apoptosis, and increased sensitivity to cobalt chloride
YLR422W	S000004414	S000004414	5799	12	965428	EVO7_4_	snp	T	C	100	19	Clone variant, promoter	Dock family protein (Dedicator Of CytoKinesis), homolog of human DOCK1; upstream component for regulation through the small GTPase Rho5p; may form a complex with Lmo1p that acts as a GEF for Rho5p; interacts with Ino4p; cytoplasmic protein that relocates to mitochondria under oxidative stress; implicated in mitophagy; not an essential protein; DOCK proteins act as guanine nucleotide exchange fact…
YLR422W	S000004414	S000004414	5799	12	965428	EVO7_6_	snp	T	C	100	9	Clone variant, promoter	Dock family protein (Dedicator Of CytoKinesis), homolog of human DOCK1; upstream component for regulation through the small GTPase Rho5p; may form a complex with Lmo1p that acts as a GEF for Rho5p; interacts with Ino4p; cytoplasmic protein that relocates to mitochondria under oxidative stress; implicated in mitophagy; not an essential protein; DOCK proteins act as guanine nucleotide exchange fact…
YLR422W	S000004414	S000004414	5799	12	965428	EVO7_7_	snp	T	C	100	11	Clone variant, promoter	Dock family protein (Dedicator Of CytoKinesis), homolog of human DOCK1; upstream component for regulation through the small GTPase Rho5p; may form a complex with Lmo1p that acts as a GEF for Rho5p; interacts with Ino4p; cytoplasmic protein that relocates to mitochondria under oxidative stress; implicated in mitophagy; not an essential protein; DOCK proteins act as guanine nucleotide exchange fact…
YLR422W	S000004414	S000004414	5799	12	965428	EVO7_9_	snp	T	C	100	32	Clone variant, promoter	Dock family protein (Dedicator Of CytoKinesis), homolog of human DOCK1; upstream component for regulation through the small GTPase Rho5p; may form a complex with Lmo1p that acts as a GEF for Rho5p; interacts with Ino4p; cytoplasmic protein that relocates to mitochondria under oxidative stress; implicated in mitophagy; not an essential protein; DOCK proteins act as guanine nucleotide exchange fact…
YLR445W	S000004437	S000004437	649	12	1025004	EVO5_3_	snp	A	T	100	4	Clone variant, other	Protein involved in meiotic crossing over; component of the Synaptonemal Complex (SC) along with Ecm11p; required for the efficient loading of the SC transverse filament protein, Zip1p; promotes SUMOylation of Ecm11p; mutants are delayed in meiotic nuclear division and are defective in synaptonemal complex assembly; transcription is regulated by Ume6p and induced in response to alpha factor
YLR445W	S000004437	S000004437	649	12	1025006	EVO5_3_	snp	A	T	80	5	Clone variant, other	Protein involved in meiotic crossing over; component of the Synaptonemal Complex (SC) along with Ecm11p; required for the efficient loading of the SC transverse filament protein, Zip1p; promotes SUMOylation of Ecm11p; mutants are delayed in meiotic nuclear division and are defective in synaptonemal complex assembly; transcription is regulated by Ume6p and induced in response to alpha factor
YLR445W	S000004437	S000004437	649	12	1025004	EVO6_5_	snp	A	T	100	2	Clone variant, other	Protein involved in meiotic crossing over; component of the Synaptonemal Complex (SC) along with Ecm11p; required for the efficient loading of the SC transverse filament protein, Zip1p; promotes SUMOylation of Ecm11p; mutants are delayed in meiotic nuclear division and are defective in synaptonemal complex assembly; transcription is regulated by Ume6p and induced in response to alpha factor
YLR445W	S000004437	S000004437	649	12	1025006	EVO6_7_	snp	A	T	100	2	Clone variant, other	Protein involved in meiotic crossing over; component of the Synaptonemal Complex (SC) along with Ecm11p; required for the efficient loading of the SC transverse filament protein, Zip1p; promotes SUMOylation of Ecm11p; mutants are delayed in meiotic nuclear division and are defective in synaptonemal complex assembly; transcription is regulated by Ume6p and induced in response to alpha factor
YMR027W	S000004629	S000004629	1413	13	326012	EVO6_5_	snp	G	C	100	26	Clone variant, nonsynonymous	A metal-dependent phosphatase, part of the DUF89 protein family; dephosphorylates fructose-1-phosphate; human ortholog, C6orf211 is involved in response to DNA damage; green fluorescent protein (GFP)-fusion protein localizes to the nucleus and cytoplasm; YMR027W is not an essential gene
YMR111C	S000004717	S000004717	1389	13	492589	EVO7_7_	snp	G	T	100	19	Clone variant, synonoymous	Protein of unknown function; green fluorescent protein (GFP)-fusion protein localizes to the nucleus; YMR111C is not an essential gene; forms nuclear foci upon DNA replication stress
YMR178W	S000004790	S000004790	825	13	618800	EVO8_10_	snp	C	A	100	30	Clone variant, nonsynonymous	FAD pyrophosphatase; hydrolyzes FAD as the preferred substrate but also acts on NADH and ADP-ribose at lower rates; activity is dependent upon K+ and divalent metal cations; green fluorescent protein (GFP)-fusion protein localizes to both the cytoplasm and nucleus; FPY1 is not an essential gene; protein abundance increases in response to DNA replication stress
YMR258C	S000004871	S000004871	1662	13	782391	EVO4_9_	snp	C	T	100	29	Clone variant, other	GTPase inhibitor with similarity to F-box proteins; inhibits Ypt52p GTPase activity by preventing Ypt52p from binding GTP; involved in regulating intracellular trafficking; physically interacts with Skp1p
YMR315W	S000004932	S000004932	1050	13	904031	EVO5_11_	snp	G	A	100	8	Clone variant, other	Protein with NADP(H) oxidoreductase activity; transcription is regulated by Stb5p in response to NADPH depletion induced by diamide; promoter contains a putative Stb5p binding site; protein abundance increases in response to DNA replication stress
YOR214C	S000005740	S000005740	711	15	746044	EVO5_5_	snp	C	T	100	19	Clone variant, nonsynonymous	Putative spore wall protein; expression increases during sporulation; not an essential gene; YOR214C has a paralog, SPO19, that arose from the whole genome duplication
YOR356W	S000005883	S000005883	1896	15	1009286	EVO6_3_	snp	C	G	100	17	Clone variant, other	Putative ortholog of human ETF-dH; found in a large supramolecular complex with other mitochondrial dehydrogenases; may have a role in oxidative stress response; ETF-dH is also known as electron transfer flavoprotein dehydrogenase
YPR091C	S000006295	S000006295	2313	16	718659	EVO2_10_	snp	C	G	100	17	Clone variant, promoter	Lipid-binding ER protein, enriched at nucleus-vacuolar junctions (NVJ); may be involved in sterol metabolism or signaling at the NVJ; contains a synaptotagmin-like-mitochondrial-lipid binding protein (SMP) domain; binds phosphatidylinositols and other lipids in a large-scale study; may interact with ribosomes, based on co-purification experiments
YPR174C	S000006378	S000006378	666	16	889036	EVO6_3_	snp	T	C	100	14	Clone variant, promoter	Protein of unknown function; green fluorescent protein (GFP)-fusion protein localizes to the nuclear periphery; potential Cdc28p substrate; binds phosphatidylinositols and phosphatidylethanolamine in a large-scale study; relative distribution to foci at the nuclear periphery increases upon DNA replication stress; YPR174C has a paralog, NBP1, that arose from the whole genome duplication
YBL052C	S000000148	SAS3	2496	2	119960	EVO5_11_	snp	G	C	100	18	Clone variant, synonoymous	Histone acetyltransferase catalytic subunit of NuA3 complex; acetylates histone H3, involved in transcriptional silencing; homolog of the mammalian MOZ proto-oncogene; mutant has aneuploidy tolerance; sas3gcn5 double mutation is lethal
YGR245C	S000003477	SDA1	2304	7	979590	EVO3_1_	snp	C	G	91	11	Clone variant, other	Protein required for actin organization and passage through Start; highly conserved nuclear protein; required for actin cytoskeleton organization; plays a critical role in G1 events; binds Nap1p; involved in 60S ribosome biogenesis
YBR214W	S000000418	SDS24	1584	2	651786	EVO7_4_	snp	T	C	100	21	Clone variant, nonsynonymous	Protein involved in cell separation during budding; one of two S. cerevisiae homologs (Sds23p and Sds24p) of the S. pombe Sds23 protein, which is implicated in APC/cyclosome regulation; may play an indirect role in fluid-phase endocytosis; protein abundance increases in response to DNA replication stress; SDS24 has a paralog, SDS23, that arose from the whole genome duplication
YIL109C	S000001371	SEC24	2781	9	160891	EVO7_4_	snp	A	T	100	24	Clone variant, promoter	Component of the Sec23p-Sec24p heterodimer of the COPII vesicle coat; required for cargo selection during vesicle formation in ER to Golgi transport; homologous to Sfb3p; SEC24 has a paralog, SFB2, that arose from the whole genome duplication
YIL109C	S000001371	SEC24	2781	9	160891	EVO7_6_	snp	A	T	100	12	Clone variant, promoter	Component of the Sec23p-Sec24p heterodimer of the COPII vesicle coat; required for cargo selection during vesicle formation in ER to Golgi transport; homologous to Sfb3p; SEC24 has a paralog, SFB2, that arose from the whole genome duplication
YIL109C	S000001371	SEC24	2781	9	160891	EVO7_7_	snp	A	T	100	15	Clone variant, promoter	Component of the Sec23p-Sec24p heterodimer of the COPII vesicle coat; required for cargo selection during vesicle formation in ER to Golgi transport; homologous to Sfb3p; SEC24 has a paralog, SFB2, that arose from the whole genome duplication
YIL109C	S000001371	SEC24	2781	9	160891	EVO7_9_	snp	A	T	100	33	Clone variant, promoter	Component of the Sec23p-Sec24p heterodimer of the COPII vesicle coat; required for cargo selection during vesicle formation in ER to Golgi transport; homologous to Sfb3p; SEC24 has a paralog, SFB2, that arose from the whole genome duplication
YGL137W	S000003105	SEC27	2870	7	252081	EVO5_5_	snp	C	T	100	17	Clone variant, nonsynonymous	Essential beta'-coat protein of the COPI coatomer; involved in ER-to-Golgi and Golgi-to-ER transport; contains WD40 domains that mediate cargo selective interactions; 45% sequence identity to mammalian beta'-COP
YGR208W	S000003440	SER2	930	7	912248	EVO7_4_	snp	G	A	100	27	Clone variant, nonsynonymous	Phosphoserine phosphatase of the phosphoglycerate pathway; involved in serine and glycine biosynthesis, expression is regulated by the available nitrogen source
YGR208W	S000003440	SER2	930	7	912248	EVO7_6_	snp	G	A	100	14	Clone variant, nonsynonymous	Phosphoserine phosphatase of the phosphoglycerate pathway; involved in serine and glycine biosynthesis, expression is regulated by the available nitrogen source
YGR208W	S000003440	SER2	930	7	912248	EVO7_7_	snp	G	A	94	33	Clone variant, nonsynonymous	Phosphoserine phosphatase of the phosphoglycerate pathway; involved in serine and glycine biosynthesis, expression is regulated by the available nitrogen source
YGR208W	S000003440	SER2	930	7	912248	EVO7_9_	snp	G	A	100	35	Clone variant, nonsynonymous	Phosphoserine phosphatase of the phosphoglycerate pathway; involved in serine and glycine biosynthesis, expression is regulated by the available nitrogen source
YLR079W	S000004069	SIC1	855	12	287387	EVO1_12_	snp	A	C	100	20	Clone variant, nonsynonymous	Cyclin-dependent kinase inhibitor (CKI); inhibitor of Cdc28-Clb kinase complexes that controls G1/S phase transition, preventing premature S phase and ensuring genomic integrity; phosphorylated by Clb5/6-Cdk1 and Cln1/2-Cdk1 kinase which regulate timing of Sic1p degradation; phosphorylation targets Sic1p for SCF(CDC4)-dependent turnover; functional homolog of mammalian Kip1
YKR101W	S000001809	SIR1	1965	11	641157	EVO2_1_	snp	G	C	100	26	Clone variant, nonsynonymous	Protein involved in silencing at mating-type loci HML and HMR; recruitment to silent chromatin requires interactions with Orc1p and with Sir4p, through a common Sir1p domain; binds to centromeric chromatin
YKR101W	S000001809	SIR1	1965	11	641157	EVO2_2_	snp	G	C	100	20	Clone variant, nonsynonymous	Protein involved in silencing at mating-type loci HML and HMR; recruitment to silent chromatin requires interactions with Orc1p and with Sir4p, through a common Sir1p domain; binds to centromeric chromatin
YKR101W	S000001809	SIR1	1965	11	641157	EVO2_3_	snp	G	C	100	29	Clone variant, nonsynonymous	Protein involved in silencing at mating-type loci HML and HMR; recruitment to silent chromatin requires interactions with Orc1p and with Sir4p, through a common Sir1p domain; binds to centromeric chromatin
YKR101W	S000001809	SIR1	1965	11	640539	EVO3_8_	snp	A	T	100	10	Clone variant, nonsynonymous	Protein involved in silencing at mating-type loci HML and HMR; recruitment to silent chromatin requires interactions with Orc1p and with Sir4p, through a common Sir1p domain; binds to centromeric chromatin
YLR442C	S000004434	SIR3	2937	12	1021514	EVO1_3_	indel	A	-T	96	25	Clone variant, nonsynonymous	Silencing protein; interacts with Sir2p, Sir4p, and histone H3/H4 tails to establish transcriptionally silent chromatin; required for spreading of silenced chromatin; recruited to chromatin through interaction with Rap1p; C-terminus assumes variant winged helix-turn-helix (wH) fold that mediates homodimerization, which is critical for holo-SIR complex loading; required for telomere hypercluster f…
YLR442C	S000004434	SIR3	2937	12	1019595	EVO1_9_	snp	C	A	100	19	Clone variant, nonsynonymous	Silencing protein; interacts with Sir2p, Sir4p, and histone H3/H4 tails to establish transcriptionally silent chromatin; required for spreading of silenced chromatin; recruited to chromatin through interaction with Rap1p; C-terminus assumes variant winged helix-turn-helix (wH) fold that mediates homodimerization, which is critical for holo-SIR complex loading; required for telomere hypercluster f…
YLR442C	S000004434	SIR3	2937	12	1022219	EVO6_1_	snp	C	T	100	5	Clone variant, nonsynonymous	Silencing protein; interacts with Sir2p, Sir4p, and histone H3/H4 tails to establish transcriptionally silent chromatin; required for spreading of silenced chromatin; recruited to chromatin through interaction with Rap1p; C-terminus assumes variant winged helix-turn-helix (wH) fold that mediates homodimerization, which is critical for holo-SIR complex loading; required for telomere hypercluster f…
YLR442C	S000004434	SIR3	2937	12	1021993	EVO6_3_	snp	C	T	100	14	Clone variant, nonsynonymous	Silencing protein; interacts with Sir2p, Sir4p, and histone H3/H4 tails to establish transcriptionally silent chromatin; required for spreading of silenced chromatin; recruited to chromatin through interaction with Rap1p; C-terminus assumes variant winged helix-turn-helix (wH) fold that mediates homodimerization, which is critical for holo-SIR complex loading; required for telomere hypercluster f…
YLR442C	S000004434	SIR3	2937	12	1021425	EVO6_5_	indel	G	-A	93	15	Clone variant, nonsynonymous	Silencing protein; interacts with Sir2p, Sir4p, and histone H3/H4 tails to establish transcriptionally silent chromatin; required for spreading of silenced chromatin; recruited to chromatin through interaction with Rap1p; C-terminus assumes variant winged helix-turn-helix (wH) fold that mediates homodimerization, which is critical for holo-SIR complex loading; required for telomere hypercluster f…
YDR227W	S000002635	SIR4	4077	4	919446	EVO3_12_	snp	C	A	100	9	Clone variant, nonsynonymous	SIR protein involved in assembly of silent chromatin domains; silent information regulator (SIR) along with SIR2 and SIR3; involved in assembly of silent chromatin domains at telomeres and the silent mating-type loci; some alleles of SIR4 prolong lifespan; required for telomere hypercluster formation in quiescent yeast cells
YDR227W	S000002635	SIR4	4077	4	920709	EVO4_2_	snp	C	T	100	30	Clone variant, nonsynonymous	SIR protein involved in assembly of silent chromatin domains; silent information regulator (SIR) along with SIR2 and SIR3; involved in assembly of silent chromatin domains at telomeres and the silent mating-type loci; some alleles of SIR4 prolong lifespan; required for telomere hypercluster formation in quiescent yeast cells
YDR227W	S000002635	SIR4	4077	4	921284	EVO4_3_	snp	C	T	100	9	Clone variant, nonsynonymous	SIR protein involved in assembly of silent chromatin domains; silent information regulator (SIR) along with SIR2 and SIR3; involved in assembly of silent chromatin domains at telomeres and the silent mating-type loci; some alleles of SIR4 prolong lifespan; required for telomere hypercluster formation in quiescent yeast cells
YDR227W	S000002635	SIR4	4077	4	920709	EVO4_5_	snp	C	T	100	12	Clone variant, nonsynonymous	SIR protein involved in assembly of silent chromatin domains; silent information regulator (SIR) along with SIR2 and SIR3; involved in assembly of silent chromatin domains at telomeres and the silent mating-type loci; some alleles of SIR4 prolong lifespan; required for telomere hypercluster formation in quiescent yeast cells
YDR227W	S000002635	SIR4	4077	4	919254	EVO4_9_	snp	T	A	100	23	Clone variant, nonsynonymous	SIR protein involved in assembly of silent chromatin domains; silent information regulator (SIR) along with SIR2 and SIR3; involved in assembly of silent chromatin domains at telomeres and the silent mating-type loci; some alleles of SIR4 prolong lifespan; required for telomere hypercluster formation in quiescent yeast cells
YDR227W	S000002635	SIR4	4077	4	919256	EVO4_9_	snp	C	A	100	23	Clone variant, nonsynonymous	SIR protein involved in assembly of silent chromatin domains; silent information regulator (SIR) along with SIR2 and SIR3; involved in assembly of silent chromatin domains at telomeres and the silent mating-type loci; some alleles of SIR4 prolong lifespan; required for telomere hypercluster formation in quiescent yeast cells
YDR227W	S000002635	SIR4	4077	4	920931	EVO6_7_	indel	C	-A	86	14	Clone variant, nonsynonymous	SIR protein involved in assembly of silent chromatin domains; silent information regulator (SIR) along with SIR2 and SIR3; involved in assembly of silent chromatin domains at telomeres and the silent mating-type loci; some alleles of SIR4 prolong lifespan; required for telomere hypercluster formation in quiescent yeast cells
YDL047W	S000002205	SIT4	936	4	369823	EVO7_6_	snp	G	C	100	17	Clone variant, synonoymous	Ceramide-activated, type 2A-related serine-threonine phosphatase; functions in G1/S transition of mitotic cycle; controls lifespan, mitochondrial function, cell cycle progression by regulating HXK2 phosphorylation; regulator of COPII coat dephosphorylation; required for ER to Golgi traffic; interacts with Hrr25p kinase; cytoplasmic and nuclear protein that modulates functions mediated by Pkc1p in…
YDL047W	S000002205	SIT4	936	4	369823	EVO7_9_	snp	G	C	100	34	Clone variant, synonoymous	Ceramide-activated, type 2A-related serine-threonine phosphatase; functions in G1/S transition of mitotic cycle; controls lifespan, mitochondrial function, cell cycle progression by regulating HXK2 phosphorylation; regulator of COPII coat dephosphorylation; required for ER to Golgi traffic; interacts with Hrr25p kinase; cytoplasmic and nuclear protein that modulates functions mediated by Pkc1p in…
YKR100C	S000001808	SKG1	1068	11	640539	EVO3_8_	snp	A	T	100	10	Clone variant, promoter	Transmembrane protein with a role in cell wall polymer composition; localizes on inner surface of plasma membrane at bud and in daughter cell; SKG1 has a paralog, AIM20, that arose from the whole genome duplication
YDR489W	S000002897	SLD5	885	4	1431398	EVO5_11_	snp	G	A	100	18	Clone variant, nonsynonymous	Subunit of the GINS complex (Sld5p, Psf1p, Psf2p, Psf3p); complex is localized to DNA replication origins and implicated in assembly of the DNA replication machinery
YBR156C	S000000360	SLI15	2097	2	552196	EVO7_4_	snp	G	C	100	19	Clone variant, nonsynonymous	Subunit of the conserved chromosomal passenger complex (CPC); complex regulates kinetochore-microtubule attachments, activation of the spindle tension checkpoint, and mitotic spindle disassembly; other complex members are Ipl1p, Bir1p, and Nbl1p
YCR024C	S000000618	SLM5	1479	3	161689	EVO7_9_	snp	G	A	100	33	Clone variant, nonsynonymous	Mitochondrial asparaginyl-tRNA synthetase
YER029C	S000000831	SMB1	591	5	213922	EVO8_9_	snp	C	T	100	13	Clone variant, promoter	Core Sm protein Sm B; part of heteroheptameric complex (with Smd1p, Smd2p, Smd3p, Sme1p, Smx3p, and Smx2p) that is part of the spliceosomal U1, U2, U4, and U5 snRNPs; homolog of human Sm B and Sm B'
YFL008W	S000001886	SMC1	3678	6	120018	EVO7_7_	snp	C	A	100	21	Clone variant, synonoymous	Subunit of the multiprotein cohesin complex; essential protein involved in chromosome segregation and in double-strand DNA break repair; SMC chromosomal ATPase family member, binds DNA with a preference for DNA with secondary structure
YFR031C	S000001927	SMC2	3513	6	219166	EVO6_1_	snp	G	T	100	5	Clone variant, nonsynonymous	Subunit of the condensin complex; condensin reorganizes chromosomes during both mitosis and meiosis; essential SMC chromosomal ATPase family member that forms a subcomplex with Smc2p that has ATP-hydrolyzing and DNA-binding activity, but other condensin subunits are required for chromatin binding; required for clustering of tRNA genes at the nucleolus
YGR229C	S000003461	SMI1	1518	7	950321	EVO7_7_	snp	G	T	100	22	Clone variant, nonsynonymous	Protein involved in the regulation of cell wall synthesis; proposed to be involved in coordinating cell cycle progression with cell wall integrity
YDR525W-A	S000007236	SNA2	240	4	1490717	EVO5_5_	snp	G	C	100	17	Clone variant, synonoymous	Protein of unknown function; has similarity to Pmp3p, which is involved in cation transport; green fluorescent protein (GFP)-fusion protein localizes to the cytoplasm in a punctate pattern
YGL115W	S000003083	SNF4	969	7	292651	EVO3_12_	snp	C	G	100	34	Clone variant, nonsynonymous	Activating gamma subunit of the AMP-activated Snf1p kinase complex; additional subunits of the complex are Snf1p and a Sip1p/Sip2p/Gal83p family member; activates glucose-repressed genes, represses glucose-induced genes; role in sporulation, and peroxisome biogenesis; protein abundance increases in response to DNA replication stress
YOR357C	S000005884	SNX3	489	15	1009286	EVO6_3_	snp	C	G	100	17	Clone variant, synonoymous	Sorting nexin for late-Golgi enzymes; required to maintain late-Golgi resident enzymes in their proper location by recycling molecules from the prevacuolar compartment; contains a PX domain and sequence similarity to human Snx3p
YDR464W	S000002872	SPP41	4308	4	1389034	EVO2_10_	snp	C	G	100	25	Clone variant, nonsynonymous	Protein of unknown function; involved in negative regulation of expression of spliceosome components PRP4 and PRP3; relocalizes to the cytosol in response to hypoxia
YOR190W	S000005716	SPR1	1338	15	691849	EVO1_12_	snp	A	G	100	23	Clone variant, nonsynonymous	Sporulation-specific exo-1,3-beta-glucanase; contributes to ascospore thermoresistance; SPR1 has a paralog, EXG1, that arose from the whole genome duplication
YOR190W	S000005716	SPR1	1338	15	691849	EVO1_9_	snp	A	G	100	23	Clone variant, nonsynonymous	Sporulation-specific exo-1,3-beta-glucanase; contributes to ascospore thermoresistance; SPR1 has a paralog, EXG1, that arose from the whole genome duplication
YGL207W	S000003175	SPT16	3108	7	101188	EVO1_7_	snp	C	T	100	20	Clone variant, nonsynonymous	Subunit of the heterodimeric FACT complex (Spt16p-Pob3p); FACT associates with chromatin via interaction with Nhp6Ap and Nhp6Bp, and reorganizes nucleosomes to facilitate access to DNA by RNA and DNA polymerases; specifically required for diauxic shift-induced H2B deposition onto rDNA genes; mutations cause reduced nucleosome occupancy over highly transcribed regions; coregulates transcription wi…
YGL097W	S000003065	SRM1	1449	7	323361	EVO7_9_	indel	T	+TTG	80	5	Clone variant, other	Nucleotide exchange factor for Gsp1p; localizes to the nucleus, required for nucleocytoplasmic trafficking of macromolecules; suppressor of the pheromone response pathway; potentially phosphorylated by Cdc28p; human homolog of the RAN GEF, RCC1, can complement a temperature sensitive point mutant
YBL106C	S000000202	SRO77	3033	2	12037	EVO4_3_	snp	G	A	95	19	Clone variant, synonoymous	Protein with roles in exocytosis and cation homeostasis; functions in docking and fusion of post-Golgi vesicles with plasma membrane; regulates cell proliferation and colony development via the Rho1-Tor1 pathway; interacts with SNARE protein Sec9p; homolog of Drosophila lethal giant larvae tumor suppressor; SRO77 has a paralog, SRO7, that arose from the whole genome duplication
YDL229W	S000002388	SSB1	1842	4	44318	EVO3_8_	snp	T	A	100	8	Clone variant, synonoymous	Cytoplasmic ATPase that is a ribosome-associated molecular chaperone; functions with J-protein partner Zuo1p; may be involved in folding of newly-made polypeptide chains; member of the HSP70 family; interacts with phosphatase subunit Reg1p; SSB1 has a paralog, SSB2, that arose from the whole genome duplication
YLR369W	S000004361	SSQ1	1974	12	861357	EVO8_10_	snp	G	C	100	21	Clone variant, nonsynonymous	Mitochondrial hsp70-type molecular chaperone; required for assembly of iron/sulfur clusters into proteins at a step after cluster synthesis, and for maturation of Yfh1p, which is a homolog of human frataxin implicated in Friedreich's ataxia
YLR452C	S000004444	SST2	2097	12	1039782	EVO8_10_	snp	C	T	100	20	Clone variant, synonoymous	GTPase-activating protein for Gpa1p; regulates desensitization to alpha factor pheromone; also required to prevent receptor-independent signaling of the mating pathway; member of the RGS (regulator of G-protein signaling) family
YLR452C	S000004444	SST2	2097	12	1039782	EVO8_5_	snp	C	T	97	36	Clone variant, synonoymous	GTPase-activating protein for Gpa1p; regulates desensitization to alpha factor pheromone; also required to prevent receptor-independent signaling of the mating pathway; member of the RGS (regulator of G-protein signaling) family
YLR452C	S000004444	SST2	2097	12	1039782	EVO8_7_	snp	C	T	100	33	Clone variant, synonoymous	GTPase-activating protein for Gpa1p; regulates desensitization to alpha factor pheromone; also required to prevent receptor-independent signaling of the mating pathway; member of the RGS (regulator of G-protein signaling) family
YLR452C	S000004444	SST2	2097	12	1039782	EVO8_9_	snp	C	T	100	16	Clone variant, synonoymous	GTPase-activating protein for Gpa1p; regulates desensitization to alpha factor pheromone; also required to prevent receptor-independent signaling of the mating pathway; member of the RGS (regulator of G-protein signaling) family
YLR150W	S000004140	STM1	822	12	441522	EVO1_9_	indel	C	+T	100	2	Clone variant, other	Protein required for optimal translation under nutrient stress; perturbs association of Yef3p with ribosomes; involved in TOR signaling; binds G4 quadruplex and purine motif triplex nucleic acid; helps maintain telomere structure; protein abundance increases in response to DNA replication stress; serves as a ribosome preservation factor both during quiescence and recovery
YDR320C	S000002728	SWA2	2007	4	1108364	EVO3_1_	snp	T	G	92	12	Clone variant, promoter	Auxilin-like protein involved in vesicular transport; clathrin-binding protein required for uncoating of clathrin-coated vesicles
YNL081C	S000005025	SWS2	432	14	476593	EVO7_7_	snp	C	G	100	31	Clone variant, nonsynonymous	Putative mitochondrial ribosomal protein of the small subunit; has similarity to E. coli S13 ribosomal protein; participates in controlling sporulation efficiency; localizes to vacuole in response to H2O2
YIL047C	S000001309	SYG1	2709	9	265064	EVO2_1_	snp	A	T	100	19	Clone variant, other	Plasma membrane protein of unknown function; truncation and overexpression suppresses lethality of G-alpha protein deficiency
YJL035C	S000003572	TAD2	753	10	381435	EVO4_5_	snp	A	G	100	11	Clone variant, promoter	Subunit of tRNA-specific adenosine-34 deaminase; forms a heterodimer with Tad3p that converts adenosine to inosine at the wobble position of several tRNAs
YBR198C	S000000402	TAF5	2397	2	618587	EVO7_4_	snp	C	T	100	15	Clone variant, promoter	Subunit (90 kDa) of TFIID and SAGA complexes; involved in RNA polymerase II transcription initiation and in chromatin modification
YBR198C	S000000402	TAF5	2397	2	618587	EVO7_6_	snp	C	T	100	12	Clone variant, promoter	Subunit (90 kDa) of TFIID and SAGA complexes; involved in RNA polymerase II transcription initiation and in chromatin modification
YBR198C	S000000402	TAF5	2397	2	618587	EVO7_7_	snp	C	T	100	18	Clone variant, promoter	Subunit (90 kDa) of TFIID and SAGA complexes; involved in RNA polymerase II transcription initiation and in chromatin modification
YBR198C	S000000402	TAF5	2397	2	618587	EVO7_9_	snp	C	T	100	33	Clone variant, promoter	Subunit (90 kDa) of TFIID and SAGA complexes; involved in RNA polymerase II transcription initiation and in chromatin modification
YBR150C	S000000354	TBS1	3285	2	542654	EVO6_5_	snp	C	A	100	23	Clone variant, nonsynonymous	Protein of unknown function; the authentic, non-tagged protein is detected in highly purified mitochondria in high-throughput studies; TBS1 has a paralog, HAL9, that arose from the whole genome duplication
YBL088C	S000000184	TEL1	8364	2	53299	EVO4_2_	snp	G	T	100	17	Clone variant, nonsynonymous	Protein kinase primarily involved in telomere length regulation; contributes to cell cycle checkpoint control in response to DNA damage; acts with Red1p and Mec1p to promote interhomolog recombination by phosphorylation of Hop1; functionally redundant with Mec1p; regulates P-body formation induced by replication stress; homolog of human ataxia-telangiectasia mutated (ATM) gene
YBL088C	S000000184	TEL1	8364	2	53299	EVO4_5_	snp	G	T	100	10	Clone variant, nonsynonymous	Protein kinase primarily involved in telomere length regulation; contributes to cell cycle checkpoint control in response to DNA damage; acts with Red1p and Mec1p to promote interhomolog recombination by phosphorylation of Hop1; functionally redundant with Mec1p; regulates P-body formation induced by replication stress; homolog of human ataxia-telangiectasia mutated (ATM) gene
YER011W	S000000813	TIR1	765	5	175658	EVO1_3_	indel	A	-CTTCTTCTGCTGCCTCAAGCTCTTCTGAAGCTAAGT	79	14	Clone variant, nonsynonymous	Cell wall mannoprotein; expression is downregulated at acidic pH and induced by cold shock and anaerobiosis; abundance is increased in cells cultured without shaking; member of the Srp1p/Tip1p family of serine-alanine-rich proteins
YER011W	S000000813	TIR1	765	5	175658	EVO1_7_	indel	A	-CTTCTTCTGCTGCCTCAAGCTCTTCTGAAGCTAAGT	87	15	Clone variant, nonsynonymous	Cell wall mannoprotein; expression is downregulated at acidic pH and induced by cold shock and anaerobiosis; abundance is increased in cells cultured without shaking; member of the Srp1p/Tip1p family of serine-alanine-rich proteins
YER011W	S000000813	TIR1	765	5	175658	EVO2_2_	indel	A	-CTTCTTCTGCTGCCTCAAGCTCTTCTGAAGCTAAGT	85	13	Clone variant, nonsynonymous	Cell wall mannoprotein; expression is downregulated at acidic pH and induced by cold shock and anaerobiosis; abundance is increased in cells cultured without shaking; member of the Srp1p/Tip1p family of serine-alanine-rich proteins
YER011W	S000000813	TIR1	765	5	175658	EVO3_1_	indel	A	-CTTCTTCTGCTGCCTCAAGCTCTTCTGAAGCTAAGT	100	5	Clone variant, nonsynonymous	Cell wall mannoprotein; expression is downregulated at acidic pH and induced by cold shock and anaerobiosis; abundance is increased in cells cultured without shaking; member of the Srp1p/Tip1p family of serine-alanine-rich proteins
YER011W	S000000813	TIR1	765	5	175658	EVO7_4_	indel	A	-CTTCTTCTGCTGCCTCAAGCTCTTCTGAAGCTAAGT	86	14	Clone variant, nonsynonymous	Cell wall mannoprotein; expression is downregulated at acidic pH and induced by cold shock and anaerobiosis; abundance is increased in cells cultured without shaking; member of the Srp1p/Tip1p family of serine-alanine-rich proteins
YNL273W	S000005217	TOF1	3717	14	124125	EVO4_5_	snp	C	A	100	8	Clone variant, nonsynonymous	Subunit of a replication-pausing checkpoint complex; Tof1p-Mrc1p-Csm3p acts at the stalled replication fork to promote sister chromatid cohesion after DNA damage, facilitating gap repair of damaged DNA; interacts with the MCM helicase; relocalizes to the cytosol in response to hypoxia
YOL006C	S000005366	TOP1	2310	15	315629	EVO2_3_	snp	C	T	100	3	Clone variant, promoter	Topoisomerase I; nuclear enzyme that relieves torsional strain in DNA by cleaving and re-sealing the phosphodiester backbone; relaxes both positively and negatively supercoiled DNA; functions in replication, transcription, and recombination; role in processing ribonucleoside monophosphates in genomic DNA into irreversible single-strand breaks; enzymatic activity and interaction with Nsr1p are neg…
YOL006C	S000005366	TOP1	2310	15	314130	EVO6_7_	snp	T	A	100	10	Clone variant, nonsynonymous	Topoisomerase I; nuclear enzyme that relieves torsional strain in DNA by cleaving and re-sealing the phosphodiester backbone; relaxes both positively and negatively supercoiled DNA; functions in replication, transcription, and recombination; role in processing ribonucleoside monophosphates in genomic DNA into irreversible single-strand breaks; enzymatic activity and interaction with Nsr1p are neg…
YBR162C	S000000366	TOS1	1368	2	563214	EVO4_3_	snp	C	T	100	8	Clone variant, synonoymous	Covalently-bound cell wall protein of unknown function; identified as a cell cycle regulated SBF target gene; deletion mutants are highly resistant to treatment with beta-1,3-glucanase; has sequence similarity to YJL171C
YER049W	S000000851	TPA1	1935	5	251560	EVO5_11_	indel	G	-A	100	4	Clone variant, promoter	Fe(II)/2-oxoglutarate-dependent dioxygenase family member; catalyzes the repair of methyl-base lesions in both ss and dsDNA by oxidative demethylation; Poly(rA)-binding protein involved in mRNA poly(A) tail length and mRNA stability; role in translation termination efficiency; interacts with Sup45p (eRF1), Sup35p (eRF3) and Pab1p; similar to human prolyl 4-hydroxylase OGFOD1; binds Fe(II) and 2-o…
YGR096W	S000003328	TPC1	945	7	675891	EVO6_3_	snp	C	T	100	25	Clone variant, promoter	Mitochondrial membrane transporter; mediates uptake of the essential cofactor thiamine pyrophosphate (ThPP) into mitochondria; expression appears to be regulated by carbon source; member of the mitochondrial carrier family
YLL028W	S000003951	TPO1	1761	12	84624	EVO4_2_	snp	C	T	100	24	Clone variant, promoter	Polyamine transporter of the major facilitator superfamily; member of the 12-spanner drug:H(+) antiporter DHA1 family; recognizes spermine, putrescine, and spermidine; catalyzes uptake of polyamines at alkaline pH and excretion at acidic pH; during oxidative stress exports spermine, spermidine from the cell, which controls timing of expression of stress-responsive genes; phosphorylation enhances …
YLL028W	S000003951	TPO1	1761	12	84624	EVO4_3_	snp	C	T	100	17	Clone variant, promoter	Polyamine transporter of the major facilitator superfamily; member of the 12-spanner drug:H(+) antiporter DHA1 family; recognizes spermine, putrescine, and spermidine; catalyzes uptake of polyamines at alkaline pH and excretion at acidic pH; during oxidative stress exports spermine, spermidine from the cell, which controls timing of expression of stress-responsive genes; phosphorylation enhances …
YLL028W	S000003951	TPO1	1761	12	84624	EVO4_5_	snp	C	T	100	14	Clone variant, promoter	Polyamine transporter of the major facilitator superfamily; member of the 12-spanner drug:H(+) antiporter DHA1 family; recognizes spermine, putrescine, and spermidine; catalyzes uptake of polyamines at alkaline pH and excretion at acidic pH; during oxidative stress exports spermine, spermidine from the cell, which controls timing of expression of stress-responsive genes; phosphorylation enhances …
YLL028W	S000003951	TPO1	1761	12	84624	EVO4_9_	snp	C	T	100	23	Clone variant, promoter	Polyamine transporter of the major facilitator superfamily; member of the 12-spanner drug:H(+) antiporter DHA1 family; recognizes spermine, putrescine, and spermidine; catalyzes uptake of polyamines at alkaline pH and excretion at acidic pH; during oxidative stress exports spermine, spermidine from the cell, which controls timing of expression of stress-responsive genes; phosphorylation enhances …
YKL174C	S000001657	TPO5	1857	11	121013	EVO6_1_	snp	A	T	100	10	Clone variant, nonsynonymous	Protein involved in excretion of putrescine and spermidine; putative polyamine transporter in the Golgi or post-Golgi vesicles
YKL174C	S000001657	TPO5	1857	11	121013	EVO6_3_	snp	A	T	100	22	Clone variant, nonsynonymous	Protein involved in excretion of putrescine and spermidine; putative polyamine transporter in the Golgi or post-Golgi vesicles
YKL174C	S000001657	TPO5	1857	11	121013	EVO6_5_	snp	A	T	100	30	Clone variant, nonsynonymous	Protein involved in excretion of putrescine and spermidine; putative polyamine transporter in the Golgi or post-Golgi vesicles
YKL174C	S000001657	TPO5	1857	11	121013	EVO6_7_	snp	A	T	100	22	Clone variant, nonsynonymous	Protein involved in excretion of putrescine and spermidine; putative polyamine transporter in the Golgi or post-Golgi vesicles
YPL030W	S000005951	TRM44	1704	16	494466	EVO4_2_	snp	G	C	100	27	Clone variant, nonsynonymous	tRNA(Ser) Um(44) 2'-O-methyltransferase; involved in maintaining levels of the tRNA-Ser species tS(CGA) and tS(UGA); conserved among metazoans and fungi but there does not appear to be a homolog in plants; TRM44 is a non-essential gene
YGL026C	S000002994	TRP5	2124	7	448129	EVO1_12_	snp	C	T	100	22	Clone variant, nonsynonymous	Tryptophan synthase; catalyzes the last step of tryptophan biosynthesis; regulated by the general control system of amino acid biosynthesis
YML028W	S000004490	TSA1	591	13	219941	EVO6_3_	snp	G	A	100	15	Clone variant, promoter	Thioredoxin peroxidase; acts as both ribosome-associated and free cytoplasmic antioxidant; self-associates to form high-molecular weight chaperone complex under oxidative stress; chaperone activity essential for growth in zinc deficiency; required for telomere length maintenance; binds and modulates Cdc19p activity; protein abundance increases, forms cytoplasmic foci during DNA replication stress…
YBR058C-A	S000007521	TSC3	243	2	357010	EVO4_3_	snp	T	G	100	18	Clone variant, promoter	Protein that stimulates the activity of serine palmitoyltransferase; involved in sphingolipid biosynthesis; Lcb1p and Lcb2p are the two components of serine palmitoyltransferase
YKL033W	S000001516	TTI1	3117	11	376900	EVO1_12_	snp	C	G	100	14	Clone variant, nonsynonymous	Subunit of the ASTRA complex, involved in chromatin remodeling; telomere length regulator involved in the stability or biogenesis of PIKKs such as TORC1; similar to S. pombe Tti1p; detected in highly purified mitochondria in high-throughput studies
YKL033W	S000001516	TTI1	3117	11	376900	EVO1_9_	snp	C	G	100	19	Clone variant, nonsynonymous	Subunit of the ASTRA complex, involved in chromatin remodeling; telomere length regulator involved in the stability or biogenesis of PIKKs such as TORC1; similar to S. pombe Tti1p; detected in highly purified mitochondria in high-throughput studies
YMR071C	S000004675	TVP18	504	13	411549	EVO7_7_	snp	C	A	100	13	Clone variant, promoter	Integral membrane protein; localized to late Golgi vesicles along with the v-SNARE Tlg2p; may interact with ribosomes, based on co-purification experiments; may have a role in intracellular sterol transport
YJL197W	S000003733	UBP12	3765	10	64270	EVO5_11_	snp	A	C	100	9	Clone variant, nonsynonymous	Ubiquitin-specific protease; cleaves ubiquitin from ubiquitinated proteins; present in the nucleus and cytoplasm
YJL197W	S000003733	UBP12	3765	10	64270	EVO5_3_	snp	A	C	100	19	Clone variant, nonsynonymous	Ubiquitin-specific protease; cleaves ubiquitin from ubiquitinated proteins; present in the nucleus and cytoplasm
YJL197W	S000003733	UBP12	3765	10	64270	EVO5_4_	snp	A	C	100	37	Clone variant, nonsynonymous	Ubiquitin-specific protease; cleaves ubiquitin from ubiquitinated proteins; present in the nucleus and cytoplasm
YJL197W	S000003733	UBP12	3765	10	64270	EVO5_5_	snp	A	C	100	31	Clone variant, nonsynonymous	Ubiquitin-specific protease; cleaves ubiquitin from ubiquitinated proteins; present in the nucleus and cytoplasm
YFR010W	S000001906	UBP6	1500	6	166363	EVO5_11_	snp	T	A	100	7	Clone variant, nonsynonymous	Ubiquitin-specific protease; situated in the base subcomplex of the 26S proteasome, releases free ubiquitin from branched polyubiquitin chains en bloc, rather than from the distal tip of the chain; negatively regulates degradation of ubiquitinated proteins by the proteasome; works in opposition to Hul5p polyubiquitin elongation activity; mutant has aneuploidy tolerance; human homolog UBP14 comple…
YLR024C	S000004014	UBR2	5619	12	189155	EVO8_5_	snp	T	C	100	41	Clone variant, nonsynonymous	Cytoplasmic ubiquitin-protein ligase (E3); component of the Mub1p-Ubr2p-Rad6p ubiquitin ligase complex required for the ubiquitination and degradation of Rpn4p; mediates formation of the ternary complex
YKL010C	S000001493	UFD4	4452	11	424970	EVO7_9_	snp	C	T	100	32	Clone variant, nonsynonymous	Ubiquitin-protein ligase (E3); interacts with Rpt4p and Rpt6p, two subunits of the 19S particle of the 26S proteasome; cytoplasmic E3 involved in the degradation of ubiquitin fusion proteins; relative distribution to the nucleus increases upon DNA replication stress
YKR044W	S000001752	UIP5	1332	11	522116	EVO1_12_	snp	G	T	97	31	Clone variant, nonsynonymous	Protein of unknown function that interacts with Ulp1p; a Ubl (ubiquitin-like protein)-specific protease for Smt3p protein conjugates
YOR191W	S000005717	ULS1	4860	15	691849	EVO1_12_	snp	A	G	100	23	Clone variant, promoter	Swi2/Snf2-related translocase, SUMO-Targeted Ubiquitin Ligase (STUbL); required for maintenance of NHEJ inhibition at telomeres; functions at telomeres to translocate and ubiquitinylate poly-sumoylated Rap1p for proteosomal degradation; plays role in antagonizing silencing during mating-type switching; only known STUbL with a translocase activity; contains RING finger domain; relocalizes from nuc…
YOR191W	S000005717	ULS1	4860	15	691849	EVO1_9_	snp	A	G	100	23	Clone variant, promoter	Swi2/Snf2-related translocase, SUMO-Targeted Ubiquitin Ligase (STUbL); required for maintenance of NHEJ inhibition at telomeres; functions at telomeres to translocate and ubiquitinylate poly-sumoylated Rap1p for proteosomal degradation; plays role in antagonizing silencing during mating-type switching; only known STUbL with a translocase activity; contains RING finger domain; relocalizes from nuc…
YML029W	S000004491	USA1	2517	13	219941	EVO6_3_	snp	G	A	100	15	Clone variant, other	Scaffold subunit of the Hrd1p ubiquitin ligase; also promotes ligase oligomerization; involved in ER-associated protein degradation (ERAD); interacts with the U1 snRNP-specific protein, Snp1p
YJL109C	S000003645	UTP10	5310	10	214504	EVO1_7_	snp	C	T	100	19	Clone variant, synonoymous	Nucleolar protein; component of the small subunit (SSU) processome containing the U3 snoRNA that is involved in processing of pre-18S rRNA; mutant has increased aneuploidy tolerance
YJL109C	S000003645	UTP10	5310	10	217720	EVO4_3_	snp	C	G	100	18	Clone variant, promoter	Nucleolar protein; component of the small subunit (SSU) processome containing the U3 snoRNA that is involved in processing of pre-18S rRNA; mutant has increased aneuploidy tolerance
YEL040W	S000000766	UTR2	1404	5	77825	EVO6_1_	snp	C	T	100	6	Clone variant, promoter	Chitin transglycosylase; functions in the transfer of chitin to beta(1-6) and beta(1-3) glucans in the cell wall; similar to and functionally redundant with Crh1; glycosylphosphatidylinositol (GPI)-anchored protein localized to bud neck
YGR094W	S000003326	VAS1	3315	7	675527	EVO1_3_	snp	T	C	100	6	Clone variant, other	Mitochondrial and cytoplasmic valyl-tRNA synthetase; human homolog VARS2 implicated in mitochondrial diseases, can partially complement yeast null mutant
YGR094W	S000003326	VAS1	3315	7	675527	EVO2_2_	snp	T	C	100	11	Clone variant, other	Mitochondrial and cytoplasmic valyl-tRNA synthetase; human homolog VARS2 implicated in mitochondrial diseases, can partially complement yeast null mutant
YGR094W	S000003326	VAS1	3315	7	675527	EVO3_1_	snp	T	C	86	7	Clone variant, other	Mitochondrial and cytoplasmic valyl-tRNA synthetase; human homolog VARS2 implicated in mitochondrial diseases, can partially complement yeast null mutant
YGR094W	S000003326	VAS1	3315	7	675527	EVO5_11_	snp	T	C	100	5	Clone variant, other	Mitochondrial and cytoplasmic valyl-tRNA synthetase; human homolog VARS2 implicated in mitochondrial diseases, can partially complement yeast null mutant
YGR094W	S000003326	VAS1	3315	7	675527	EVO5_5_	snp	T	C	100	7	Clone variant, other	Mitochondrial and cytoplasmic valyl-tRNA synthetase; human homolog VARS2 implicated in mitochondrial diseases, can partially complement yeast null mutant
YHL035C	S000001027	VMR1	4779	8	28765	EVO1_12_	snp	G	T	100	30	Clone variant, nonsynonymous	Vacuolar membrane protein; involved in multiple drug resistance and metal sensitivity; ATP-binding cassette (ABC) family member involved in drug transport; potential Cdc28p substrate; induced under respiratory conditions; VMR1 has a paralog, YBT1, that arose from the whole genome duplication
YLL040C	S000003963	VPS13	9435	12	54885	EVO2_1_	snp	G	C	100	22	Clone variant, synonoymous	Protein involved in prospore membrane morphogenesis; peripheral membrane protein that localizes to the prospore membrane and at numerous membrane contact sites; involved in sporulation, vacuolar protein sorting, prospore membrane formation during sporulation, and protein-Golgi retention; required for mitochondrial integrity; contains a PH-like domain; homologous to human CHAC and COH1 which are i…
YLL040C	S000003963	VPS13	9435	12	54885	EVO2_2_	snp	G	C	100	29	Clone variant, synonoymous	Protein involved in prospore membrane morphogenesis; peripheral membrane protein that localizes to the prospore membrane and at numerous membrane contact sites; involved in sporulation, vacuolar protein sorting, prospore membrane formation during sporulation, and protein-Golgi retention; required for mitochondrial integrity; contains a PH-like domain; homologous to human CHAC and COH1 which are i…
YLL040C	S000003963	VPS13	9435	12	54885	EVO2_3_	snp	G	C	100	20	Clone variant, synonoymous	Protein involved in prospore membrane morphogenesis; peripheral membrane protein that localizes to the prospore membrane and at numerous membrane contact sites; involved in sporulation, vacuolar protein sorting, prospore membrane formation during sporulation, and protein-Golgi retention; required for mitochondrial integrity; contains a PH-like domain; homologous to human CHAC and COH1 which are i…
YOR089C	S000005615	VPS21	633	15	491006	EVO6_3_	snp	G	A	83	6	Clone variant, promoter	Endosomal Rab family GTPase; required for endocytic transport and sorting of vacuolar hydrolases; required for endosomal localization of the CORVET complex; required with YPT52 for MVB biogenesis and sorting; involved in autophagy and ionic stress tolerance; geranylgeranylation required for membrane association; protein abundance increases in response to DNA replication stress; mammalian Rab5 hom…
YDR484W	S000002892	VPS52	1926	4	1422668	EVO2_10_	snp	T	A	100	12	Clone variant, promoter	Component of the GARP (Golgi-associated retrograde protein) complex; GARP is required for the recycling of proteins from endosomes to the late Golgi, and for mitosis after DNA damage induced checkpoint arrest; involved in localization of actin and chitin; members of the GARP complex are Vps51p-Vps52p-Vps53p-Vps54p
YER072W	S000000874	VTC1	390	5	302122	EVO4_3_	snp	C	A	100	19	Clone variant, promoter	Regulatory subunit of the vacuolar transporter chaperone (VTC) complex; VTC complex is involved in membrane trafficking, vacuolar polyphosphate accumulation, microautophagy and non-autophagic vacuolar fusion; also has mRNA binding activity; protein abundance increases in response to DNA replication stress
YNL197C	S000005141	WHI3	1986	14	267884	EVO2_10_	snp	C	A	100	27	Clone variant, nonsynonymous	RNA binding protein that sequesters CLN3 mRNA in cytoplasmic foci; regulates genes involved in the cell cycle, sister chromatid cohesion, and stress response; acts as a cytoplasmic retention factor for Cdc28p and associated cyclins; regulates cell fate and dose-dependently regulates the critical cell size required for passage through Start; Tpk1p (PKA) mediated phosphorylation (S568) inhibits Whi…
YNL197C	S000005141	WHI3	1986	14	269220	EVO7_4_	snp	C	A	100	27	Clone variant, nonsynonymous	RNA binding protein that sequesters CLN3 mRNA in cytoplasmic foci; regulates genes involved in the cell cycle, sister chromatid cohesion, and stress response; acts as a cytoplasmic retention factor for Cdc28p and associated cyclins; regulates cell fate and dose-dependently regulates the critical cell size required for passage through Start; Tpk1p (PKA) mediated phosphorylation (S568) inhibits Whi…
YNL197C	S000005141	WHI3	1986	14	269220	EVO7_6_	snp	C	A	100	10	Clone variant, nonsynonymous	RNA binding protein that sequesters CLN3 mRNA in cytoplasmic foci; regulates genes involved in the cell cycle, sister chromatid cohesion, and stress response; acts as a cytoplasmic retention factor for Cdc28p and associated cyclins; regulates cell fate and dose-dependently regulates the critical cell size required for passage through Start; Tpk1p (PKA) mediated phosphorylation (S568) inhibits Whi…
YNL197C	S000005141	WHI3	1986	14	269220	EVO7_7_	snp	C	A	91	11	Clone variant, nonsynonymous	RNA binding protein that sequesters CLN3 mRNA in cytoplasmic foci; regulates genes involved in the cell cycle, sister chromatid cohesion, and stress response; acts as a cytoplasmic retention factor for Cdc28p and associated cyclins; regulates cell fate and dose-dependently regulates the critical cell size required for passage through Start; Tpk1p (PKA) mediated phosphorylation (S568) inhibits Whi…
YNL197C	S000005141	WHI3	1986	14	269220	EVO7_9_	snp	C	A	100	25	Clone variant, nonsynonymous	RNA binding protein that sequesters CLN3 mRNA in cytoplasmic foci; regulates genes involved in the cell cycle, sister chromatid cohesion, and stress response; acts as a cytoplasmic retention factor for Cdc28p and associated cyclins; regulates cell fate and dose-dependently regulates the critical cell size required for passage through Start; Tpk1p (PKA) mediated phosphorylation (S568) inhibits Whi…
YDL224C	S000002383	WHI4	1950	4	54707	EVO5_11_	snp	G	A	100	11	Clone variant, nonsynonymous	Putative RNA binding protein; regulates the cell size requirement for passage through Start and commitment to cell division; WHI4 has a paralog, WHI3, that arose from the whole genome duplication
YLR090W	S000004080	XDJ1	1380	12	320334	EVO6_1_	indel	G	-A	100	2	Clone variant, promoter	Chaperone with a role in facilitating mitochondrial protein import; ascomycete-specific member of the DnaJ-like family, closely related to Ydj1p; predicted to be C-terminally prenylated; the authentic, non-tagged protein is detected in highly purified mitochondria in high-throughput studies
YDR259C	S000002667	YAP6	1152	4	974679	EVO6_5_	snp	A	T	100	10	Clone variant, nonsynonymous	Basic leucine zipper (bZIP) transcription factor; physically interacts with the Tup1-Cyc8 complex and recruits Tup1p to its targets; overexpression increases sodium and lithium tolerance; computational analysis suggests a role in regulation of expression of genes involved in carbohydrate metabolism; YAP6 has a paralog, CIN5, that arose from the whole genome duplication
YAR035W	S000000080	YAT1	2064	1	190907	EVO1_12_	snp	G	T	100	16	Clone variant, nonsynonymous	Outer mitochondrial carnitine acetyltransferase; minor ethanol-inducible enzyme involved in transport of activated acyl groups from the cytoplasm into the mitochondrial matrix; phosphorylated
YLL055W	S000003978	YCT1	1596	12	29496	EVO7_9_	indel	A	-CATCCGAGTTCAG	95	40	Clone variant, promoter	High-affinity cysteine-specific transporter; has similarity to the Dal5p family of transporters; green fluorescent protein (GFP)-fusion protein localizes to the endoplasmic reticulum; YCT1 is not an essential gene
YPL201C	S000006122	YIG1	1386	16	170484	EVO5_11_	snp	C	T	100	13	Clone variant, nonsynonymous	Protein that interacts with glycerol 3-phosphatase; plays a role in anaerobic glycerol production; localizes to the nucleus and cytosol
YKL196C	S000001679	YKT6	603	11	75385	EVO6_1_	snp	C	G	100	12	Clone variant, nonsynonymous	Vesicle membrane protein (v-SNARE) with acyltransferase activity; involved in trafficking to and within the Golgi, endocytic trafficking to the vacuole, and vacuolar fusion; membrane localization due to prenylation at the carboxy-terminus; human homolog YKT6 can complement yeast ykt6 mutant
YKL196C	S000001679	YKT6	603	11	75385	EVO6_3_	snp	C	G	100	26	Clone variant, nonsynonymous	Vesicle membrane protein (v-SNARE) with acyltransferase activity; involved in trafficking to and within the Golgi, endocytic trafficking to the vacuole, and vacuolar fusion; membrane localization due to prenylation at the carboxy-terminus; human homolog YKT6 can complement yeast ykt6 mutant
YKL196C	S000001679	YKT6	603	11	75385	EVO6_5_	snp	C	G	100	32	Clone variant, nonsynonymous	Vesicle membrane protein (v-SNARE) with acyltransferase activity; involved in trafficking to and within the Golgi, endocytic trafficking to the vacuole, and vacuolar fusion; membrane localization due to prenylation at the carboxy-terminus; human homolog YKT6 can complement yeast ykt6 mutant
YKL196C	S000001679	YKT6	603	11	75385	EVO6_7_	snp	C	G	100	27	Clone variant, nonsynonymous	Vesicle membrane protein (v-SNARE) with acyltransferase activity; involved in trafficking to and within the Golgi, endocytic trafficking to the vacuole, and vacuolar fusion; membrane localization due to prenylation at the carboxy-terminus; human homolog YKT6 can complement yeast ykt6 mutant
YML038C	S000004502	YMD8	1329	13	203203	EVO1_7_	snp	C	T	100	34	Clone variant, synonoymous	Putative nucleotide sugar transporter; has similarity to Vrg4p
YPR024W	S000006228	YME1	2244	16	611900	EVO3_12_	snp	T	A	100	26	Clone variant, nonsynonymous	Catalytic subunit of i-AAA protease complex; complex is located in mitochondrial inner membrane; responsible for degradation of unfolded or misfolded mitochondrial gene products; serves as nonconventional translocation motor to pull PNPase into intermembrane space; also has role in intermembrane space protein folding; mutation causes elevated rate of mitochondrial turnover; human homolog YME1L1 c…
YER031C	S000000833	YPT31	672	5	213922	EVO8_9_	snp	C	T	100	13	Clone variant, other	Rab family GTPase; involved in the exocytic pathway; mediates intra-Golgi traffic or the budding of post-Golgi vesicles from the trans-Golgi; YPT31 has a paralog, YPT32, that arose from the whole genome duplication; localizes to the transitional and late Golgi
YDR002W	S000002409	YRB1	606	4	452906	EVO1_7_	snp	C	A	100	2	Clone variant, promoter	Ran GTPase binding protein; involved in nuclear protein import and RNA export, ubiquitin-mediated protein degradation during the cell cycle; shuttles between the nucleus and cytoplasm; is essential; homolog of human RanBP1
YNL339C	S000005283	YRF1-6	5728	14	6674	EVO8_5_	indel	A	-C	100	12	Clone variant, promoter	Helicase encoded by the Y' element of subtelomeric regions; highly expressed in the mutants lacking the telomerase component TLC1; potentially phosphorylated by Cdc28p
YNL339C	S000005283	YRF1-6	5728	14	6674	EVO8_7_	indel	A	-C	79	24	Clone variant, promoter	Helicase encoded by the Y' element of subtelomeric regions; highly expressed in the mutants lacking the telomerase component TLC1; potentially phosphorylated by Cdc28p
YNL339C	S000005283	YRF1-6	5728	14	6674	EVO8_9_	indel	A	-C	91	11	Clone variant, promoter	Helicase encoded by the Y' element of subtelomeric regions; highly expressed in the mutants lacking the telomerase component TLC1; potentially phosphorylated by Cdc28p
YBR148W	S000000352	YSW1	1830	2	539092	EVO8_10_	snp	C	G	100	18	Clone variant, nonsynonymous	Protein required for normal prospore membrane formation; interacts with Gip1p, which is the meiosis-specific regulatory subunit of the Glc7p protein phosphatase; expressed specifically in spores and localizes to the prospore membrane; YSW1 has a paralog, SPO21, that arose from the whole genome duplication

## Sheet: ctf4D populations
systematic name	sgdid	gene	size	chromosome	position	population	type	reference nt	clone nt	fraction	reads	mutation effect	description
YLL034C	S000003957	RIX7	2514	12	70712	EVO1_	snp	C	A	31	39	Clone variant, nonsynonymous	Putative ATPase of the AAA family; required for export of pre-ribosomal large subunits from the nucleus; distributed between the nucleolus, nucleoplasm, and nuclear periphery depending on growth conditions
YPL110C	S000006031	GDE1	3672	16	342929	EVO1_	snp	C	T	34	50	Clone variant, nonsynonymous	Glycerophosphocholine (GroPCho) phosphodiesterase; hydrolyzes GroPCho to choline and glycerolphosphate, for use as a phosphate source and as a precursor for phosphocholine synthesis; may interact with ribosomes
YGL076C	S000003044	RPL7A	1662	7	365506	EVO1_	snp	A	T	54	13	Clone variant, nonsynonymous	Ribosomal 60S subunit protein L7A; required for processing of 27SA3 pre-rRNA to 27SB pre-rRNA during assembly of large ribosomal subunit; depletion leads to a turnover of pre-rRNA; contains a conserved C-terminal Nucleic acid Binding Domain (NDB2); binds to Domain II of 25S and 5.8S rRNAs; homologous to mammalian ribosomal protein L7 and bacterial L30; RPL7A has a paralog, RPL7B, that arose from …
YBL088C	S000000184	TEL1	8364	2	53299	EVO4_	snp	G	T	64	58	Clone variant, nonsynonymous	Protein kinase primarily involved in telomere length regulation; contributes to cell cycle checkpoint control in response to DNA damage; acts with Red1p and Mec1p to promote interhomolog recombination by phosphorylation of Hop1; functionally redundant with Mec1p; regulates P-body formation induced by replication stress; homolog of human ataxia-telangiectasia mutated (ATM) gene
YDR499W	S000002907	LCD1	2244	4	1448364	EVO2_	snp	G	A	100	34	Clone variant, nonsynonymous	Essential protein required for the DNA integrity checkpoint pathways; interacts physically with Mec1p; putative homolog of S. pombe Rad26 and human ATRIP; forms nuclear foci upon DNA replication stress
YDR499W	S000002907	LCD1	2244	4	1447521	EVO8_	snp	A	T	25	32	Clone variant, promoter	Essential protein required for the DNA integrity checkpoint pathways; interacts physically with Mec1p; putative homolog of S. pombe Rad26 and human ATRIP; forms nuclear foci upon DNA replication stress
YLR097C	S000004087	HRT3	1035	12	336579	EVO2_	snp	T	C	100	44	Clone variant, nonsynonymous	Putative SCF-ubiquitin ligase F-box protein; based on both genetic and physical interactions and sequence similarity; identified in association with Cdc53p, Skp1p and Ubi4 in large and small-scale studies
YBL101C	S000000197	ECM21	3354	2	25687	EVO4_	snp	A	C	27	96	Clone variant, nonsynonymous	Protein involved in regulating endocytosis of plasma membrane proteins; identified as a substrate for ubiquitination by Rsp5p and deubiquitination by Ubp2p; promoter contains several Gcn4p binding elements; ECM21 has a paralog, CSR2, that arose from the whole genome duplication
YBR148W	S000000352	YSW1	1830	2	539222	EVO2_	snp	C	T	21	19	Clone variant, nonsynonymous	Protein required for normal prospore membrane formation; interacts with Gip1p, which is the meiosis-specific regulatory subunit of the Glc7p protein phosphatase; expressed specifically in spores and localizes to the prospore membrane; YSW1 has a paralog, SPO21, that arose from the whole genome duplication
YKR101W	S000001809	SIR1	1965	11	640539	EVO3_	snp	A	T	22	46	Clone variant, nonsynonymous	Protein involved in silencing at mating-type loci HML and HMR; recruitment to silent chromatin requires interactions with Orc1p and with Sir4p, through a common Sir1p domain; binds to centromeric chromatin
YKR101W	S000001809	SIR1	1965	11	641157	EVO2_	snp	G	C	100	69	Clone variant, nonsynonymous	Protein involved in silencing at mating-type loci HML and HMR; recruitment to silent chromatin requires interactions with Orc1p and with Sir4p, through a common Sir1p domain; binds to centromeric chromatin
YKR092C	S000001800	SRP40	1221	11	613119	EVO2_	indel	A	-CGAGCTTGAAGAATCGGACGAGCCTGAAGAGTCTGAGTC	47	17	Clone variant, nonsynonymous	Nucleolar serine-rich protein; role in preribosome assembly or transport; may function as a chaperone of small nucleolar ribonucleoprotein particles (snoRNPs); immunologically and structurally to rat Nopp140
YKR092C	S000001800	SRP40	1221	11	613119	EVO4_	indel	A	-CGAGCTTGAAGAATCGGACGAGCCTGAAGAGTCTGAGTC	27	37	Clone variant, nonsynonymous	Nucleolar serine-rich protein; role in preribosome assembly or transport; may function as a chaperone of small nucleolar ribonucleoprotein particles (snoRNPs); immunologically and structurally to rat Nopp140
YKR092C	S000001800	SRP40	1221	11	613119	EVO1_	indel	A	-CGAGCTTGAAGAATCGGACGAGCCTGAAGAGTCTGAGTC	31	13	Clone variant, nonsynonymous	Nucleolar serine-rich protein; role in preribosome assembly or transport; may function as a chaperone of small nucleolar ribonucleoprotein particles (snoRNPs); immunologically and structurally to rat Nopp140
YKR092C	S000001800	SRP40	1221	11	613119	EVO3_	indel	A	-CGAGCTTGAAGAATCGGACGAGCCTGAAGAGTCTGAGTC	25	28	Clone variant, nonsynonymous	Nucleolar serine-rich protein; role in preribosome assembly or transport; may function as a chaperone of small nucleolar ribonucleoprotein particles (snoRNPs); immunologically and structurally to rat Nopp140
YDR172W	S000002579	SUP35	2058	4	809935	EVO1_	snp	C	A	42	100	Clone variant, nonsynonymous	Translation termination factor eRF3; has a role in mRNA deadenylation and decay; altered protein conformation creates the [PSI(+)] prion that modifies cellular fitness, alters translational fidelity by affecting reading frame selection, and results in a nonsense suppressor phenotype; many stress-response genes are repressed in the presence of [PSI(+)]
YKR039W	S000001747	GAP1	1809	11	516851	EVO1_	snp	T	A	33	12	Clone variant, nonsynonymous	General amino acid permease; Gap1p senses the presence of amino acid substrates to regulate localization to the plasma membrane when needed; essential for invasive growth
YJL090C	S000003626	DPB11	2295	10	263247	EVO3_	indel	G	+T	97	34	Clone variant, nonsynonymous	DNA replication initiation protein; loads DNA pol epsilon onto pre-replication complexes at origins; checkpoint sensor recruited to stalled replication forks by the checkpoint clamp complex where it activates Mec1p; along with Rfa1p, binds to ultrafine anaphase bridges in mitotic cells and prevents accumulation of chromatin bridges by stimulating the Mec1p kinase and suppressing homologous recomb…
YDL055C	S000002213	PSA1	1086	4	356262	EVO3_	snp	T	G	100	34	Clone variant, nonsynonymous	GDP-mannose pyrophosphorylase (mannose-1-phosphate guanyltransferase); synthesizes GDP-mannose from GTP and mannose-1-phosphate in cell wall biosynthesis; required for normal cell wall structure
YDL055C	S000002213	PSA1	1086	4	355458	EVO3_	snp	C	A	25	8	Clone variant, other	GDP-mannose pyrophosphorylase (mannose-1-phosphate guanyltransferase); synthesizes GDP-mannose from GTP and mannose-1-phosphate in cell wall biosynthesis; required for normal cell wall structure
YHR211W	S000001254	FLO5	3228	8	526728	EVO3_	snp	C	T	22	93	Clone variant, nonsynonymous	Lectin-like cell wall protein (flocculin) involved in flocculation; binds mannose chains on the surface of other cells, confers floc-forming ability that is chymotrypsin resistant but heat labile; important for co-flocculation with other yeasts, mediating interaction with specific species; FLO5 has a paralog, FLO1, that arose from a segmental duplication
YHR211W	S000001254	FLO5	3228	8	526731	EVO3_	snp	T	C	21	95	Clone variant, nonsynonymous	Lectin-like cell wall protein (flocculin) involved in flocculation; binds mannose chains on the surface of other cells, confers floc-forming ability that is chymotrypsin resistant but heat labile; important for co-flocculation with other yeasts, mediating interaction with specific species; FLO5 has a paralog, FLO1, that arose from a segmental duplication
YHR211W	S000001254	FLO5	3228	8	526800	EVO1_	snp	A	G	31	150	Clone variant, nonsynonymous	Lectin-like cell wall protein (flocculin) involved in flocculation; binds mannose chains on the surface of other cells, confers floc-forming ability that is chymotrypsin resistant but heat labile; important for co-flocculation with other yeasts, mediating interaction with specific species; FLO5 has a paralog, FLO1, that arose from a segmental duplication
YHR211W	S000001254	FLO5	3228	8	526800	EVO3_	snp	A	G	31	170	Clone variant, nonsynonymous	Lectin-like cell wall protein (flocculin) involved in flocculation; binds mannose chains on the surface of other cells, confers floc-forming ability that is chymotrypsin resistant but heat labile; important for co-flocculation with other yeasts, mediating interaction with specific species; FLO5 has a paralog, FLO1, that arose from a segmental duplication
YHR211W	S000001254	FLO5	3228	8	526945	EVO1_	snp	G	A	33	70	Clone variant, nonsynonymous	Lectin-like cell wall protein (flocculin) involved in flocculation; binds mannose chains on the surface of other cells, confers floc-forming ability that is chymotrypsin resistant but heat labile; important for co-flocculation with other yeasts, mediating interaction with specific species; FLO5 has a paralog, FLO1, that arose from a segmental duplication
YHR211W	S000001254	FLO5	3228	8	527168	EVO1_	snp	G	C	27	86	Clone variant, nonsynonymous	Lectin-like cell wall protein (flocculin) involved in flocculation; binds mannose chains on the surface of other cells, confers floc-forming ability that is chymotrypsin resistant but heat labile; important for co-flocculation with other yeasts, mediating interaction with specific species; FLO5 has a paralog, FLO1, that arose from a segmental duplication
YHR211W	S000001254	FLO5	3228	8	528702	EVO3_	snp	T	C	38	69	Clone variant, other	Lectin-like cell wall protein (flocculin) involved in flocculation; binds mannose chains on the surface of other cells, confers floc-forming ability that is chymotrypsin resistant but heat labile; important for co-flocculation with other yeasts, mediating interaction with specific species; FLO5 has a paralog, FLO1, that arose from a segmental duplication
YHR211W	S000001254	FLO5	3228	8	528723	EVO2_	snp	A	G	33	45	Clone variant, other	Lectin-like cell wall protein (flocculin) involved in flocculation; binds mannose chains on the surface of other cells, confers floc-forming ability that is chymotrypsin resistant but heat labile; important for co-flocculation with other yeasts, mediating interaction with specific species; FLO5 has a paralog, FLO1, that arose from a segmental duplication
YHR211W	S000001254	FLO5	3228	8	528723	EVO3_	snp	A	G	41	64	Clone variant, other	Lectin-like cell wall protein (flocculin) involved in flocculation; binds mannose chains on the surface of other cells, confers floc-forming ability that is chymotrypsin resistant but heat labile; important for co-flocculation with other yeasts, mediating interaction with specific species; FLO5 has a paralog, FLO1, that arose from a segmental duplication
YKL033W	S000001516	TTI1	3117	11	376900	EVO1_	snp	C	G	23	31	Clone variant, nonsynonymous	Subunit of the ASTRA complex, involved in chromatin remodeling; telomere length regulator involved in the stability or biogenesis of PIKKs such as TORC1; similar to S. pombe Tti1p; detected in highly purified mitochondria in high-throughput studies
YOL146W	S000005506	PSF3	585	15	49431	EVO2_	snp	G	A	100	31	Clone variant, nonsynonymous	Subunit of the GINS complex (Sld5p, Psf1p, Psf2p, Psf3p); complex is localized to DNA replication origins and implicated in assembly of the DNA replication machinery
YOL146W	S000005506	PSF3	585	15	48915	EVO7_	snp	G	T	100	33	Clone variant, nonsynonymous	Subunit of the GINS complex (Sld5p, Psf1p, Psf2p, Psf3p); complex is localized to DNA replication origins and implicated in assembly of the DNA replication machinery
YKL163W	S000001646	PIR3	978	11	144724	EVO2_	indel	A	+CCG	35	17	Clone variant, nonsynonymous	O-glycosylated covalently-bound cell wall protein; required for cell wall stability; expression is cell cycle regulated, peaking in M/G1 and also subject to regulation by the cell integrity pathway; coding sequence contains length polymorphisms in different strains; PIR3 has a paralog, HSP150, that arose from the whole genome duplication
YKL163W	S000001646	PIR3	978	11	144724	EVO1_	indel	A	+CCG	25	16	Clone variant, nonsynonymous	O-glycosylated covalently-bound cell wall protein; required for cell wall stability; expression is cell cycle regulated, peaking in M/G1 and also subject to regulation by the cell integrity pathway; coding sequence contains length polymorphisms in different strains; PIR3 has a paralog, HSP150, that arose from the whole genome duplication
YKL163W	S000001646	PIR3	978	11	144724	EVO3_	indel	A	+CCG	29	14	Clone variant, nonsynonymous	O-glycosylated covalently-bound cell wall protein; required for cell wall stability; expression is cell cycle regulated, peaking in M/G1 and also subject to regulation by the cell integrity pathway; coding sequence contains length polymorphisms in different strains; PIR3 has a paralog, HSP150, that arose from the whole genome duplication
YKL163W	S000001646	PIR3	978	11	144825	EVO3_	snp	T	C	20	10	Clone variant, nonsynonymous	O-glycosylated covalently-bound cell wall protein; required for cell wall stability; expression is cell cycle regulated, peaking in M/G1 and also subject to regulation by the cell integrity pathway; coding sequence contains length polymorphisms in different strains; PIR3 has a paralog, HSP150, that arose from the whole genome duplication
YKL163W	S000001646	PIR3	978	11	144918	EVO2_	snp	C	T	26	31	Clone variant, nonsynonymous	O-glycosylated covalently-bound cell wall protein; required for cell wall stability; expression is cell cycle regulated, peaking in M/G1 and also subject to regulation by the cell integrity pathway; coding sequence contains length polymorphisms in different strains; PIR3 has a paralog, HSP150, that arose from the whole genome duplication
YKL163W	S000001646	PIR3	978	11	144918	EVO3_	snp	C	T	23	26	Clone variant, nonsynonymous	O-glycosylated covalently-bound cell wall protein; required for cell wall stability; expression is cell cycle regulated, peaking in M/G1 and also subject to regulation by the cell integrity pathway; coding sequence contains length polymorphisms in different strains; PIR3 has a paralog, HSP150, that arose from the whole genome duplication
YKL163W	S000001646	PIR3	978	11	144726	EVO5_	snp	T	C	20	10	Clone variant, nonsynonymous	O-glycosylated covalently-bound cell wall protein; required for cell wall stability; expression is cell cycle regulated, peaking in M/G1 and also subject to regulation by the cell integrity pathway; coding sequence contains length polymorphisms in different strains; PIR3 has a paralog, HSP150, that arose from the whole genome duplication
YKL163W	S000001646	PIR3	978	11	144726	EVO6_	snp	T	C	38	8	Clone variant, nonsynonymous	O-glycosylated covalently-bound cell wall protein; required for cell wall stability; expression is cell cycle regulated, peaking in M/G1 and also subject to regulation by the cell integrity pathway; coding sequence contains length polymorphisms in different strains; PIR3 has a paralog, HSP150, that arose from the whole genome duplication
YKL163W	S000001646	PIR3	978	11	144843	EVO7_	snp	C	T	25	12	Clone variant, nonsynonymous	O-glycosylated covalently-bound cell wall protein; required for cell wall stability; expression is cell cycle regulated, peaking in M/G1 and also subject to regulation by the cell integrity pathway; coding sequence contains length polymorphisms in different strains; PIR3 has a paralog, HSP150, that arose from the whole genome duplication
YER032W	S000000834	FIR1	2631	5	215797	EVO1_	snp	C	T	42	48	Clone variant, nonsynonymous	Protein involved in 3' mRNA processing; interacts with Ref2p; APCC(Cdh1) substrate; potential Cdc28p substrate
YER032W	S000000834	FIR1	2631	5	217678	EVO8_	snp	C	A	20	10	Clone variant, nonsynonymous	Protein involved in 3' mRNA processing; interacts with Ref2p; APCC(Cdh1) substrate; potential Cdc28p substrate
YPL013C	S000005934	MRPS16	366	16	529000	EVO3_	snp	A	C	25	24	Clone variant, nonsynonymous	Mitochondrial ribosomal protein of the small subunit
YPL013C	S000005934	MRPS16	366	16	528979	EVO2_	snp	C	T	20	25	Clone variant, other	Mitochondrial ribosomal protein of the small subunit
YAL019W	S000000017	FUN30	3396	1	115434	EVO2_	snp	C	T	100	61	Clone variant, nonsynonymous	Snf2p family member with ATP-dependent chromatin remodeling activity; has a role in silencing at the mating type locus, telomeres and centromeres; enriched at centromeres and is required for correct chromatin structure around centromeres, as well as at the boundary element of the silent HMR; recruited to DNA double-strand breaks (DSBs) where it promotes 5' strand resection of DSBs; potential Cdc2…
YJL186W	S000003722	MNN5	1761	10	80403	EVO2_	snp	T	A	98	47	Clone variant, nonsynonymous	Alpha-1,2-mannosyltransferase; responsible for addition of the second alpha-1,2-linked mannose of the branches on the mannan backbone of oligosaccharides, localizes to an early Golgi compartment
YLR172C	S000004162	DPH5	903	12	501308	EVO4_	snp	A	C	100	48	Clone variant, nonsynonymous	Methyltransferase required for synthesis of diphthamide; diphthamide is a modified histidine residue of translation elongation factor 2 (Eft1p or Eft2p); not essential for viability; GFP-Dph5p fusion protein localizes to the cytoplasm
YKL032C	S000001515	IXR1	1794	11	380465	EVO1_	snp	T	G	93	30	Clone variant, nonsynonymous	Transcriptional repressor that regulates hypoxic genes during normoxia; involved in the aerobic repression of genes such as COX5b, TIR1, and HEM13; binds DNA intrastrand cross-links formed by cisplatin; HMG (high mobility group box) domain containing protein which binds and bends cisplatin-modified DNA, blocking excision repair; IXR1 has a paralog, ABF2, that arose from the whole genome duplicati…
YKL032C	S000001515	IXR1	1794	11	380936	EVO3_	snp	G	A	100	40	Clone variant, nonsynonymous	Transcriptional repressor that regulates hypoxic genes during normoxia; involved in the aerobic repression of genes such as COX5b, TIR1, and HEM13; binds DNA intrastrand cross-links formed by cisplatin; HMG (high mobility group box) domain containing protein which binds and bends cisplatin-modified DNA, blocking excision repair; IXR1 has a paralog, ABF2, that arose from the whole genome duplicati…
YKL032C	S000001515	IXR1	1794	11	381779	EVO4_	snp	G	A	100	61	Clone variant, nonsynonymous	Transcriptional repressor that regulates hypoxic genes during normoxia; involved in the aerobic repression of genes such as COX5b, TIR1, and HEM13; binds DNA intrastrand cross-links formed by cisplatin; HMG (high mobility group box) domain containing protein which binds and bends cisplatin-modified DNA, blocking excision repair; IXR1 has a paralog, ABF2, that arose from the whole genome duplicati…
YKL032C	S000001515	IXR1	1794	11	380595	EVO6_	snp	G	C	100	30	Clone variant, nonsynonymous	Transcriptional repressor that regulates hypoxic genes during normoxia; involved in the aerobic repression of genes such as COX5b, TIR1, and HEM13; binds DNA intrastrand cross-links formed by cisplatin; HMG (high mobility group box) domain containing protein which binds and bends cisplatin-modified DNA, blocking excision repair; IXR1 has a paralog, ABF2, that arose from the whole genome duplicati…
YKL032C	S000001515	IXR1	1794	11	380782	EVO8_	indel	T	-G	100	21	Clone variant, nonsynonymous	Transcriptional repressor that regulates hypoxic genes during normoxia; involved in the aerobic repression of genes such as COX5b, TIR1, and HEM13; binds DNA intrastrand cross-links formed by cisplatin; HMG (high mobility group box) domain containing protein which binds and bends cisplatin-modified DNA, blocking excision repair; IXR1 has a paralog, ABF2, that arose from the whole genome duplicati…
YKL032C	S000001515	IXR1	1794	11	380864	EVO5_	snp	G	A	95	22	Clone variant, nonsynonymous	Transcriptional repressor that regulates hypoxic genes during normoxia; involved in the aerobic repression of genes such as COX5b, TIR1, and HEM13; binds DNA intrastrand cross-links formed by cisplatin; HMG (high mobility group box) domain containing protein which binds and bends cisplatin-modified DNA, blocking excision repair; IXR1 has a paralog, ABF2, that arose from the whole genome duplicati…
YER011W	S000000813	TIR1	765	5	175658	EVO1_	indel	A	-CTTCTTCTGCTGCCTCAAGCTCTTCTGAAGCTAAGT	77	39	Clone variant, nonsynonymous	Cell wall mannoprotein; expression is downregulated at acidic pH and induced by cold shock and anaerobiosis; abundance is increased in cells cultured without shaking; member of the Srp1p/Tip1p family of serine-alanine-rich proteins
YDR227W	S000002635	SIR4	4077	4	920709	EVO4_	snp	C	T	67	48	Clone variant, nonsynonymous	SIR protein involved in assembly of silent chromatin domains; silent information regulator (SIR) along with SIR2 and SIR3; involved in assembly of silent chromatin domains at telomeres and the silent mating-type loci; some alleles of SIR4 prolong lifespan; required for telomere hypercluster formation in quiescent yeast cells
YDR227W	S000002635	SIR4	4077	4	921284	EVO4_	snp	C	T	37	38	Clone variant, nonsynonymous	SIR protein involved in assembly of silent chromatin domains; silent information regulator (SIR) along with SIR2 and SIR3; involved in assembly of silent chromatin domains at telomeres and the silent mating-type loci; some alleles of SIR4 prolong lifespan; required for telomere hypercluster formation in quiescent yeast cells
YFL041W	S000001853	FET5	1869	6	50552	EVO1_	snp	C	T	48	80	Clone variant, nonsynonymous	Multicopper oxidase; integral membrane protein with similarity to Fet3p; may have a role in iron transport
YDR217C	S000002625	RAD9	3930	4	900463	EVO1_	snp	A	C	33	33	Clone variant, nonsynonymous	DNA damage-dependent checkpoint protein; required for cell-cycle arrest in G1/S, intra-S, and G2/M, plays a role in postreplication repair (PRR) pathway; transmits checkpoint signal by activating Rad53p and Chk1p; hyperphosphorylated by Mec1p and Tel1p; multiple cyclin dependent kinase consensus sites and the C-terminal BRCT domain contribute to DNA damage checkpoint activation; Rad9p Chk1 Activa…
YDR217C	S000002625	RAD9	3930	4	900852	EVO4_	indel	A	+T	83	54	Clone variant, nonsynonymous	DNA damage-dependent checkpoint protein; required for cell-cycle arrest in G1/S, intra-S, and G2/M, plays a role in postreplication repair (PRR) pathway; transmits checkpoint signal by activating Rad53p and Chk1p; hyperphosphorylated by Mec1p and Tel1p; multiple cyclin dependent kinase consensus sites and the C-terminal BRCT domain contribute to DNA damage checkpoint activation; Rad9p Chk1 Activa…
YDR217C	S000002625	RAD9	3930	4	901576	EVO1_	indel	C	+T	44	32	Clone variant, nonsynonymous	DNA damage-dependent checkpoint protein; required for cell-cycle arrest in G1/S, intra-S, and G2/M, plays a role in postreplication repair (PRR) pathway; transmits checkpoint signal by activating Rad53p and Chk1p; hyperphosphorylated by Mec1p and Tel1p; multiple cyclin dependent kinase consensus sites and the C-terminal BRCT domain contribute to DNA damage checkpoint activation; Rad9p Chk1 Activa…
YDR217C	S000002625	RAD9	3930	4	900852	EVO5_	indel	A	+T	65	26	Clone variant, nonsynonymous	DNA damage-dependent checkpoint protein; required for cell-cycle arrest in G1/S, intra-S, and G2/M, plays a role in postreplication repair (PRR) pathway; transmits checkpoint signal by activating Rad53p and Chk1p; hyperphosphorylated by Mec1p and Tel1p; multiple cyclin dependent kinase consensus sites and the C-terminal BRCT domain contribute to DNA damage checkpoint activation; Rad9p Chk1 Activa…
YDR217C	S000002625	RAD9	3930	4	900852	EVO6_	indel	A	+T	94	34	Clone variant, nonsynonymous	DNA damage-dependent checkpoint protein; required for cell-cycle arrest in G1/S, intra-S, and G2/M, plays a role in postreplication repair (PRR) pathway; transmits checkpoint signal by activating Rad53p and Chk1p; hyperphosphorylated by Mec1p and Tel1p; multiple cyclin dependent kinase consensus sites and the C-terminal BRCT domain contribute to DNA damage checkpoint activation; Rad9p Chk1 Activa…
YLR442C	S000004434	SIR3	2937	12	1021514	EVO1_	indel	A	-T	54	54	Clone variant, nonsynonymous	Silencing protein; interacts with Sir2p, Sir4p, and histone H3/H4 tails to establish transcriptionally silent chromatin; required for spreading of silenced chromatin; recruited to chromatin through interaction with Rap1p; C-terminus assumes variant winged helix-turn-helix (wH) fold that mediates homodimerization, which is critical for holo-SIR complex loading; required for telomere hypercluster f…
YLR442C	S000004434	SIR3	2937	12	1020638	EVO5_	snp	G	C	62	26	Clone variant, nonsynonymous	Silencing protein; interacts with Sir2p, Sir4p, and histone H3/H4 tails to establish transcriptionally silent chromatin; required for spreading of silenced chromatin; recruited to chromatin through interaction with Rap1p; C-terminus assumes variant winged helix-turn-helix (wH) fold that mediates homodimerization, which is critical for holo-SIR complex loading; required for telomere hypercluster f…
YLR442C	S000004434	SIR3	2937	12	1021993	EVO6_	snp	C	T	63	57	Clone variant, nonsynonymous	Silencing protein; interacts with Sir2p, Sir4p, and histone H3/H4 tails to establish transcriptionally silent chromatin; required for spreading of silenced chromatin; recruited to chromatin through interaction with Rap1p; C-terminus assumes variant winged helix-turn-helix (wH) fold that mediates homodimerization, which is critical for holo-SIR complex loading; required for telomere hypercluster f…
YDL104C	S000002262	QRI7	1224	4	273654	EVO2_	snp	A	C	27	15	Clone variant, nonsynonymous	Protein involved in threonylcarbamoyl adenosine biosynthesis; Sua5p and Qri7p are necessary and sufficient for RNA t6A modification in vitro; highly conserved mitochondrial protein; essential for t6A modification of mitochondrial tRNAs that decode ANN codons; similar to Kae1p and E. coli YgjD, both of which are also required for tRNA t6A modification; when directed to the cytoplasm, complements t…
YJL061W	S000003597	NUP82	2142	10	321032	EVO3_	snp	G	A	91	55	Clone variant, nonsynonymous	Linker nucleoporin component of the nuclear pore complex (NPC); also part of the NPC cytoplasmic filaments; contributes to nucleocytoplasmic transport and NPC biogenesis; forms stable associations with three FG-nucleoporins (Nsp1p, Nup159p, and Nup116p); relocalizes to the cytosol in response to hypoxia
YER071C	S000000873	S000000873	381	5	302122	EVO4_	snp	C	A	25	59	Clone variant, nonsynonymous	Subunit of a complex that associates with actin filaments; forms a complex with Aim21p that inhibits barbed end F-actin assembly; elevates actin monomer pools to increase endocytotic efficiency and to regulate the distribution of actin between cables and patches; Aim21p/Tda2p forms a larger complex with actin capping proteins Cap1p and Cap2p; TcTex1-type dynein light chain family member; null mut…
YHR086W	S000001128	NAM8	1572	8	278571	EVO4_	snp	A	C	20	70	Clone variant, nonsynonymous	RNA binding protein, component of the U1 snRNP protein; mutants are defective in meiotic recombination and in formation of viable spores, involved in the formation of DSBs through meiosis-specific splicing of REC107 pre-mRNA; Nam8p regulon embraces the meiotic pre-mRNAs of REC107, HFM1, AMA1 SPO22 and PCH2; the putative RNA binding domains RRM2 and RRM3 are required for Nam8p meiotic function
YAL063C	S000000059	FLO9	3969	1	25141	EVO2_	snp	G	A	28	128	Clone variant, nonsynonymous	Lectin-like protein with similarity to Flo1p; thought to be expressed and involved in flocculation
YAL063C	S000000059	FLO9	3969	1	25141	EVO4_	snp	G	A	25	131	Clone variant, nonsynonymous	Lectin-like protein with similarity to Flo1p; thought to be expressed and involved in flocculation
YAL063C	S000000059	FLO9	3969	1	25518	EVO2_	snp	G	A	27	11	Clone variant, nonsynonymous	Lectin-like protein with similarity to Flo1p; thought to be expressed and involved in flocculation
YDR207C	S000002615	UME6	2511	4	867046	EVO2_	snp	G	T	46	94	Clone variant, nonsynonymous	Rpd3L histone deacetylase complex subunit; key transcriptional regulator of early meiotic genes; involved in chromatin remodeling and transcriptional repression via DNA looping; binds URS1 upstream regulatory sequence, represses transcription by recruiting conserved histone deacetylase Rpd3p (through co-repressor Sin3p) and chromatin-remodeling factor Isw2p; couples metabolic responses to nutriti…
YDR207C	S000002615	UME6	2511	4	865030	EVO7_	snp	C	T	21	14	Clone variant, nonsynonymous	Rpd3L histone deacetylase complex subunit; key transcriptional regulator of early meiotic genes; involved in chromatin remodeling and transcriptional repression via DNA looping; binds URS1 upstream regulatory sequence, represses transcription by recruiting conserved histone deacetylase Rpd3p (through co-repressor Sin3p) and chromatin-remodeling factor Isw2p; couples metabolic responses to nutriti…
YGL029W	S000002997	CGR1	363	7	440403	EVO1_	snp	C	A	22	9	Clone variant, nonsynonymous	Protein involved in nucleolar integrity and processing of pre-rRNA; has a role in processing rRNA for the 60S ribosome subunit; transcript is induced in response to cytotoxic stress but not genotoxic stress; relocalizes from nucleus to nucleolus upon DNA replication stress
YGL029W	S000002997	CGR1	363	7	440416	EVO4_	snp	G	A	20	20	Clone variant, nonsynonymous	Protein involved in nucleolar integrity and processing of pre-rRNA; has a role in processing rRNA for the 60S ribosome subunit; transcript is induced in response to cytotoxic stress but not genotoxic stress; relocalizes from nucleus to nucleolus upon DNA replication stress
YGL029W	S000002997	CGR1	363	7	440416	EVO3_	snp	G	A	20	15	Clone variant, nonsynonymous	Protein involved in nucleolar integrity and processing of pre-rRNA; has a role in processing rRNA for the 60S ribosome subunit; transcript is induced in response to cytotoxic stress but not genotoxic stress; relocalizes from nucleus to nucleolus upon DNA replication stress
YGL029W	S000002997	CGR1	363	7	440428	EVO1_	snp	G	A	25	8	Clone variant, other	Protein involved in nucleolar integrity and processing of pre-rRNA; has a role in processing rRNA for the 60S ribosome subunit; transcript is induced in response to cytotoxic stress but not genotoxic stress; relocalizes from nucleus to nucleolus upon DNA replication stress
YGL029W	S000002997	CGR1	363	7	440428	EVO3_	snp	G	A	33	18	Clone variant, other	Protein involved in nucleolar integrity and processing of pre-rRNA; has a role in processing rRNA for the 60S ribosome subunit; transcript is induced in response to cytotoxic stress but not genotoxic stress; relocalizes from nucleus to nucleolus upon DNA replication stress
YOR315W	S000005842	SFG1	1041	15	904808	EVO3_	indel	C	+A	27	11	Clone variant, nonsynonymous	Nuclear protein putative transcription factor; required for growth of superficial pseudohyphae (which do not invade the agar substrate) but not for invasive pseudohyphal growth; may act together with Phd1p; potential Cdc28p substrate
YMR164C	S000004774	MSS11	2277	13	588629	EVO2_	indel	T	-TGC	22	27	Clone variant, nonsynonymous	Transcription factor; involved in regulation of invasive growth and starch degradation; controls the activation of FLO11 and STA2 in response to nutritional signals; forms a heterodimer with Flo8p that interacts with the Swi/Snf complex during transcriptional activation of FLO1, FLO11, and STA1
YMR164C	S000004774	MSS11	2277	13	588629	EVO1_	indel	T	-TGC	22	23	Clone variant, nonsynonymous	Transcription factor; involved in regulation of invasive growth and starch degradation; controls the activation of FLO11 and STA2 in response to nutritional signals; forms a heterodimer with Flo8p that interacts with the Swi/Snf complex during transcriptional activation of FLO1, FLO11, and STA1
YMR164C	S000004774	MSS11	2277	13	587657	EVO6_	snp	A	G	100	5	Clone variant, nonsynonymous	Transcription factor; involved in regulation of invasive growth and starch degradation; controls the activation of FLO11 and STA2 in response to nutritional signals; forms a heterodimer with Flo8p that interacts with the Swi/Snf complex during transcriptional activation of FLO1, FLO11, and STA1
YMR164C	S000004774	MSS11	2277	13	587664	EVO6_	snp	T	C	100	4	Clone variant, nonsynonymous	Transcription factor; involved in regulation of invasive growth and starch degradation; controls the activation of FLO11 and STA2 in response to nutritional signals; forms a heterodimer with Flo8p that interacts with the Swi/Snf complex during transcriptional activation of FLO1, FLO11, and STA1
YMR164C	S000004774	MSS11	2277	13	588566	EVO7_	indel	T	-TGC	23	22	Clone variant, nonsynonymous	Transcription factor; involved in regulation of invasive growth and starch degradation; controls the activation of FLO11 and STA2 in response to nutritional signals; forms a heterodimer with Flo8p that interacts with the Swi/Snf complex during transcriptional activation of FLO1, FLO11, and STA1
YMR164C	S000004774	MSS11	2277	13	588605	EVO5_	indel	C	+TGT	22	9	Clone variant, nonsynonymous	Transcription factor; involved in regulation of invasive growth and starch degradation; controls the activation of FLO11 and STA2 in response to nutritional signals; forms a heterodimer with Flo8p that interacts with the Swi/Snf complex during transcriptional activation of FLO1, FLO11, and STA1
YMR164C	S000004774	MSS11	2277	13	588632	EVO7_	snp	C	T	68	19	Clone variant, nonsynonymous	Transcription factor; involved in regulation of invasive growth and starch degradation; controls the activation of FLO11 and STA2 in response to nutritional signals; forms a heterodimer with Flo8p that interacts with the Swi/Snf complex during transcriptional activation of FLO1, FLO11, and STA1
YOR190W	S000005716	SPR1	1338	15	691849	EVO1_	snp	A	G	26	54	Clone variant, nonsynonymous	Sporulation-specific exo-1,3-beta-glucanase; contributes to ascospore thermoresistance; SPR1 has a paralog, EXG1, that arose from the whole genome duplication
YGL195W	S000003163	GCN1	8019	7	134409	EVO2_	snp	G	T	100	59	Clone variant, nonsynonymous	Positive regulator of the Gcn2p kinase activity; forms a complex with Gcn20p; proposed to stimulate Gcn2p activation by an uncharged tRNA
YOR346W	S000005873	REV1	2958	15	984766	EVO1_	snp	C	A	20	20	Clone variant, nonsynonymous	Deoxycytidyl transferase; involved in repair of abasic sites and adducted guanines in damaged DNA by translesion synthesis (TLS); forms a complex with the subunits of DNA polymerase zeta, Rev3p and Rev7p; relocalizes from nucleus to cytoplasm upon DNA replication stress
YOL068C	S000005429	HST1	1512	15	200390	EVO2_	snp	G	T	20	10	Clone variant, nonsynonymous	NAD(+)-dependent histone deacetylase; essential subunit of the Sum1p/Rfm1p/Hst1p complex required for ORC-dependent silencing and meiotic repression; non-essential subunit of the Set3C deacetylase complex; involved in telomere maintenance; HST1 has a paralog, SIR2, that arose from the whole genome duplication
YOL068C	S000005429	HST1	1512	15	200362	EVO1_	snp	G	T	25	8	Clone variant, other	NAD(+)-dependent histone deacetylase; essential subunit of the Sum1p/Rfm1p/Hst1p complex required for ORC-dependent silencing and meiotic repression; non-essential subunit of the Set3C deacetylase complex; involved in telomere maintenance; HST1 has a paralog, SIR2, that arose from the whole genome duplication
YBR162C	S000000366	TOS1	1368	2	563214	EVO4_	snp	C	T	32	31	Clone variant, nonsynonymous	Covalently-bound cell wall protein of unknown function; identified as a cell cycle regulated SBF target gene; deletion mutants are highly resistant to treatment with beta-1,3-glucanase; has sequence similarity to YJL171C
YOL100W	S000005460	PKH2	3246	15	129637	EVO4_	snp	T	G	35	51	Clone variant, nonsynonymous	Serine/threonine protein kinase; involved in sphingolipid-mediated signaling pathway that controls endocytosis; activates Ypk1p and Ykr2p, components of signaling cascade required for maintenance of cell wall integrity; contains a PH-like domain; redundant with Pkh1p; PKH2 has a paralog, PKH1, that arose from the whole genome duplication
YDR140W	S000002547	MTQ2	666	4	734753	EVO3_	snp	C	G	85	40	Clone variant, nonsynonymous	S-adenosylmethionine-dependent methyltransferase; subunit of complex with Trm112p that methylates translation release factor Sup45p (eRF1) in the ternary complex eRF1-eRF3-GTP; similar to E.coli PrmC; member of the seven beta-strand family
YGR295C	S000003527	COS6	1146	7	1082464	EVO1_	snp	C	A	21	24	Clone variant, nonsynonymous	Endosomal protein involved in turnover of plasma membrane proteins; member of the DUP380 subfamily of conserved, often subtelomeric COS genes; required for the multivesicular vesicle body sorting pathway that internalizes plasma membrane proteins for degradation; Cos proteins provide ubiquitin in trans for nonubiquitinated cargo proteins
YGR295C	S000003527	COS6	1146	7	1082672	EVO1_	snp	C	A	26	31	Clone variant, nonsynonymous	Endosomal protein involved in turnover of plasma membrane proteins; member of the DUP380 subfamily of conserved, often subtelomeric COS genes; required for the multivesicular vesicle body sorting pathway that internalizes plasma membrane proteins for degradation; Cos proteins provide ubiquitin in trans for nonubiquitinated cargo proteins
YGR295C	S000003527	COS6	1146	7	1082673	EVO1_	snp	T	C	25	32	Clone variant, nonsynonymous	Endosomal protein involved in turnover of plasma membrane proteins; member of the DUP380 subfamily of conserved, often subtelomeric COS genes; required for the multivesicular vesicle body sorting pathway that internalizes plasma membrane proteins for degradation; Cos proteins provide ubiquitin in trans for nonubiquitinated cargo proteins
YGR295C	S000003527	COS6	1146	7	1082687	EVO1_	snp	T	C	24	33	Clone variant, nonsynonymous	Endosomal protein involved in turnover of plasma membrane proteins; member of the DUP380 subfamily of conserved, often subtelomeric COS genes; required for the multivesicular vesicle body sorting pathway that internalizes plasma membrane proteins for degradation; Cos proteins provide ubiquitin in trans for nonubiquitinated cargo proteins
YGR271C-A	S000007608	EFG1	702	7	1038224	EVO4_	indel	C	+T	21	14	Clone variant, nonsynonymous	Essential protein required for maturation of 18S rRNA; null mutant is sensitive to hydroxyurea and is delayed in recovering from alpha-factor arrest; green fluorescent protein (GFP)-fusion protein localizes to the nucleolus
YER087W	S000000889	AIM10	1731	5	331031	EVO4_	snp	G	A	22	49	Clone variant, nonsynonymous	Protein with similarity to tRNA synthetases; non-tagged protein is detected in purified mitochondria; null mutant is viable and displays elevated frequency of mitochondrial genome loss
YOR305W	S000005832	RRG7	729	15	889739	EVO2_	snp	C	A	50	4	Clone variant, nonsynonymous	Protein of unknown function; green fluorescent protein (GFP)-fusion protein localizes to the mitochondrion; deletion confers sensitivity to 4-(N-(S-glutathionylacetyl)amino) phenylarsenoxide (GSAO); YOR305W is not an essential gene
YAR050W	S000000084	FLO1	4614	1	205741	EVO2_	snp	T	C	33	9	Clone variant, nonsynonymous	Lectin-like protein involved in flocculation; cell wall protein that binds mannose chains on the surface of other cells, confers floc-forming ability that is chymotrypsin sensitive and heat resistant; important for co-flocculation with other yeasts, mediating interaction with specific species; FLO1 has a paralog, FLO5, that arose from a segmental duplication
YAR050W	S000000084	FLO1	4614	1	205747	EVO1_	snp	C	T	21	14	Clone variant, nonsynonymous	Lectin-like protein involved in flocculation; cell wall protein that binds mannose chains on the surface of other cells, confers floc-forming ability that is chymotrypsin sensitive and heat resistant; important for co-flocculation with other yeasts, mediating interaction with specific species; FLO1 has a paralog, FLO5, that arose from a segmental duplication
YAR050W	S000000084	FLO1	4614	1	205747	EVO3_	snp	C	T	20	10	Clone variant, nonsynonymous	Lectin-like protein involved in flocculation; cell wall protein that binds mannose chains on the surface of other cells, confers floc-forming ability that is chymotrypsin sensitive and heat resistant; important for co-flocculation with other yeasts, mediating interaction with specific species; FLO1 has a paralog, FLO5, that arose from a segmental duplication
YAR050W	S000000084	FLO1	4614	1	205810	EVO2_	snp	C	T	38	53	Clone variant, nonsynonymous	Lectin-like protein involved in flocculation; cell wall protein that binds mannose chains on the surface of other cells, confers floc-forming ability that is chymotrypsin sensitive and heat resistant; important for co-flocculation with other yeasts, mediating interaction with specific species; FLO1 has a paralog, FLO5, that arose from a segmental duplication
YAR050W	S000000084	FLO1	4614	1	205810	EVO1_	snp	C	T	45	49	Clone variant, nonsynonymous	Lectin-like protein involved in flocculation; cell wall protein that binds mannose chains on the surface of other cells, confers floc-forming ability that is chymotrypsin sensitive and heat resistant; important for co-flocculation with other yeasts, mediating interaction with specific species; FLO1 has a paralog, FLO5, that arose from a segmental duplication
YAR050W	S000000084	FLO1	4614	1	205810	EVO3_	snp	C	T	35	62	Clone variant, nonsynonymous	Lectin-like protein involved in flocculation; cell wall protein that binds mannose chains on the surface of other cells, confers floc-forming ability that is chymotrypsin sensitive and heat resistant; important for co-flocculation with other yeasts, mediating interaction with specific species; FLO1 has a paralog, FLO5, that arose from a segmental duplication
YAR050W	S000000084	FLO1	4614	1	205747	EVO8_	snp	C	T	31	16	Clone variant, nonsynonymous	Lectin-like protein involved in flocculation; cell wall protein that binds mannose chains on the surface of other cells, confers floc-forming ability that is chymotrypsin sensitive and heat resistant; important for co-flocculation with other yeasts, mediating interaction with specific species; FLO1 has a paralog, FLO5, that arose from a segmental duplication
YAR050W	S000000084	FLO1	4614	1	206350	EVO5_	snp	T	C	26	241	Clone variant, nonsynonymous	Lectin-like protein involved in flocculation; cell wall protein that binds mannose chains on the surface of other cells, confers floc-forming ability that is chymotrypsin sensitive and heat resistant; important for co-flocculation with other yeasts, mediating interaction with specific species; FLO1 has a paralog, FLO5, that arose from a segmental duplication
YAR050W	S000000084	FLO1	4614	1	206350	EVO7_	snp	T	C	29	239	Clone variant, nonsynonymous	Lectin-like protein involved in flocculation; cell wall protein that binds mannose chains on the surface of other cells, confers floc-forming ability that is chymotrypsin sensitive and heat resistant; important for co-flocculation with other yeasts, mediating interaction with specific species; FLO1 has a paralog, FLO5, that arose from a segmental duplication
YAR050W	S000000084	FLO1	4614	1	206350	EVO6_	snp	T	C	30	219	Clone variant, nonsynonymous	Lectin-like protein involved in flocculation; cell wall protein that binds mannose chains on the surface of other cells, confers floc-forming ability that is chymotrypsin sensitive and heat resistant; important for co-flocculation with other yeasts, mediating interaction with specific species; FLO1 has a paralog, FLO5, that arose from a segmental duplication
YAR050W	S000000084	FLO1	4614	1	206350	EVO8_	snp	T	C	30	267	Clone variant, nonsynonymous	Lectin-like protein involved in flocculation; cell wall protein that binds mannose chains on the surface of other cells, confers floc-forming ability that is chymotrypsin sensitive and heat resistant; important for co-flocculation with other yeasts, mediating interaction with specific species; FLO1 has a paralog, FLO5, that arose from a segmental duplication
YAR050W	S000000084	FLO1	4614	1	206820	EVO5_	indel	C	+TTCTTCATTCATTTC	56	18	Clone variant, nonsynonymous	Lectin-like protein involved in flocculation; cell wall protein that binds mannose chains on the surface of other cells, confers floc-forming ability that is chymotrypsin sensitive and heat resistant; important for co-flocculation with other yeasts, mediating interaction with specific species; FLO1 has a paralog, FLO5, that arose from a segmental duplication
YER147C	S000000949	SCC4	1875	5	462985	EVO2_	snp	G	A	22	9	Clone variant, synonoymous	Subunit of cohesin loading factor (Scc2p-Scc4p); complex is required for the loading of cohesin complexes onto chromosomes; involved in establishing sister chromatid cohesion during double-strand break repair via phosphorylated histone H2AX
YER147C	S000000949	SCC4	1875	5	462936	EVO5_	snp	G	A	22	9	Clone variant, other	Subunit of cohesin loading factor (Scc2p-Scc4p); complex is required for the loading of cohesin complexes onto chromosomes; involved in establishing sister chromatid cohesion during double-strand break repair via phosphorylated histone H2AX
YER147C	S000000949	SCC4	1875	5	462941	EVO5_	snp	C	A	22	9	Clone variant, other	Subunit of cohesin loading factor (Scc2p-Scc4p); complex is required for the loading of cohesin complexes onto chromosomes; involved in establishing sister chromatid cohesion during double-strand break repair via phosphorylated histone H2AX
YGL166W	S000003134	CUP2	678	7	191694	EVO4_	snp	C	T	72	85	Clone variant, synonoymous	Copper-binding transcription factor; activates transcription of the metallothionein genes CUP1-1 and CUP1-2 in response to elevated copper concentrations; required for regulation of copper genes in response to DNA-damaging reagents; CUP2 has a paralog, HAA1, that arose from the whole genome duplication
Q0070	S000007265	AI5_ALPHA	9350	17	22328	EVO1_	snp	T	A	27	22	Clone variant, synonoymous	Endonuclease I-SceIV; involved in intron mobility; encoded by a mobile group I intron within the mitochondrial COX1 gene
YBR059C	S000000263	AKL1	3327	2	357010	EVO4_	snp	T	G	29	55	Clone variant, synonoymous	Ser/Thr protein kinase; phosphorylates Pan1p, Sla1p and Ent1p to negatively regulate endocytosis in response to membrane stress; regulates actin cytoskeleton organization and clathrin-dependent endocytosis; phosphorylated and inhibited by upstream kinase, Fpk1p; member, along with Ark1p and Prk1p, of the Ark kinase family
YOR202W	S000005728	HIS3	663	15	722530	EVO4_	snp	C	T	27	182	Clone variant, synonoymous	Imidazoleglycerol-phosphate dehydratase; catalyzes the sixth step in histidine biosynthesis; mutations cause histidine auxotrophy and sensitivity to Cu, Co, and Ni salts; transcription is regulated by general amino acid control via Gcn4p
YOR202W	S000005728	HIS3	663	15	722532	EVO4_	snp	T	G	27	184	Clone variant, synonoymous	Imidazoleglycerol-phosphate dehydratase; catalyzes the sixth step in histidine biosynthesis; mutations cause histidine auxotrophy and sensitivity to Cu, Co, and Ni salts; transcription is regulated by general amino acid control via Gcn4p
YOR202W	S000005728	HIS3	663	15	722535	EVO4_	snp	G	T	28	180	Clone variant, synonoymous	Imidazoleglycerol-phosphate dehydratase; catalyzes the sixth step in histidine biosynthesis; mutations cause histidine auxotrophy and sensitivity to Cu, Co, and Ni salts; transcription is regulated by general amino acid control via Gcn4p
YDL229W	S000002388	SSB1	1842	4	44318	EVO3_	snp	T	A	27	30	Clone variant, synonoymous	Cytoplasmic ATPase that is a ribosome-associated molecular chaperone; functions with J-protein partner Zuo1p; may be involved in folding of newly-made polypeptide chains; member of the HSP70 family; interacts with phosphatase subunit Reg1p; SSB1 has a paralog, SSB2, that arose from the whole genome duplication
YEL053C	S000000779	MAK10	2202	5	55745	EVO3_	snp	T	C	100	144	Clone variant, synonoymous	Non-catalytic subunit of the NatC N-terminal acetyltransferase; required for replication of dsRNA virus; expression is glucose-repressible; human NatC ortholog, Naa35, requires co-expression of the human catalytic subunit, Naa30, to functionally complement the null allele
YLL040C	S000003963	VPS13	9435	12	54885	EVO2_	snp	G	C	98	61	Clone variant, synonoymous	Protein involved in prospore membrane morphogenesis; peripheral membrane protein that localizes to the prospore membrane and at numerous membrane contact sites; involved in sporulation, vacuolar protein sorting, prospore membrane formation during sporulation, and protein-Golgi retention; required for mitochondrial integrity; contains a PH-like domain; homologous to human CHAC and COH1 which are i…
YGR258C	S000003490	RAD2	3096	7	1010960	EVO2_	indel	A	-G	25	8	Clone variant, promoter	Single-stranded DNA endonuclease; cleaves single-stranded DNA during nucleotide excision repair to excise damaged DNA; subunit of Nucleotide Excision Repair Factor 3 (NEF3); homolog of human XPG protein
YGR258C	S000003490	RAD2	3096	7	1011004	EVO4_	snp	C	A	29	7	Clone variant, promoter	Single-stranded DNA endonuclease; cleaves single-stranded DNA during nucleotide excision repair to excise damaged DNA; subunit of Nucleotide Excision Repair Factor 3 (NEF3); homolog of human XPG protein
YGR258C	S000003490	RAD2	3096	7	1011007	EVO2_	snp	C	A	22	9	Clone variant, promoter	Single-stranded DNA endonuclease; cleaves single-stranded DNA during nucleotide excision repair to excise damaged DNA; subunit of Nucleotide Excision Repair Factor 3 (NEF3); homolog of human XPG protein
YGR258C	S000003490	RAD2	3096	7	1011007	EVO4_	snp	C	A	20	10	Clone variant, promoter	Single-stranded DNA endonuclease; cleaves single-stranded DNA during nucleotide excision repair to excise damaged DNA; subunit of Nucleotide Excision Repair Factor 3 (NEF3); homolog of human XPG protein
YGR258C	S000003490	RAD2	3096	7	1011007	EVO3_	snp	C	A	27	11	Clone variant, promoter	Single-stranded DNA endonuclease; cleaves single-stranded DNA during nucleotide excision repair to excise damaged DNA; subunit of Nucleotide Excision Repair Factor 3 (NEF3); homolog of human XPG protein
YGR258C	S000003490	RAD2	3096	7	1011013	EVO3_	snp	G	T	20	10	Clone variant, promoter	Single-stranded DNA endonuclease; cleaves single-stranded DNA during nucleotide excision repair to excise damaged DNA; subunit of Nucleotide Excision Repair Factor 3 (NEF3); homolog of human XPG protein
YGR258C	S000003490	RAD2	3096	7	1011061	EVO3_	snp	C	A	20	10	Clone variant, promoter	Single-stranded DNA endonuclease; cleaves single-stranded DNA during nucleotide excision repair to excise damaged DNA; subunit of Nucleotide Excision Repair Factor 3 (NEF3); homolog of human XPG protein
YGR258C	S000003490	RAD2	3096	7	1011071	EVO3_	indel	C	-CAAAA	21	14	Clone variant, promoter	Single-stranded DNA endonuclease; cleaves single-stranded DNA during nucleotide excision repair to excise damaged DNA; subunit of Nucleotide Excision Repair Factor 3 (NEF3); homolog of human XPG protein
YGR258C	S000003490	RAD2	3096	7	1010957	EVO6_	snp	G	A	20	10	Clone variant, promoter	Single-stranded DNA endonuclease; cleaves single-stranded DNA during nucleotide excision repair to excise damaged DNA; subunit of Nucleotide Excision Repair Factor 3 (NEF3); homolog of human XPG protein
YGR258C	S000003490	RAD2	3096	7	1011007	EVO7_	snp	C	A	50	6	Clone variant, promoter	Single-stranded DNA endonuclease; cleaves single-stranded DNA during nucleotide excision repair to excise damaged DNA; subunit of Nucleotide Excision Repair Factor 3 (NEF3); homolog of human XPG protein
YKL046C	S000001529	DCW1	1350	11	352849	EVO2_	snp	T	G	27	99	Clone variant, promoter	Putative mannosidase; GPI-anchored membrane protein required for cell wall biosynthesis in bud formation;homologous to Dfg5p
YKL046C	S000001529	DCW1	1350	11	352849	EVO4_	snp	T	G	30	83	Clone variant, promoter	Putative mannosidase; GPI-anchored membrane protein required for cell wall biosynthesis in bud formation;homologous to Dfg5p
YKL046C	S000001529	DCW1	1350	11	352849	EVO6_	snp	T	G	25	97	Clone variant, promoter	Putative mannosidase; GPI-anchored membrane protein required for cell wall biosynthesis in bud formation;homologous to Dfg5p
YKL046C	S000001529	DCW1	1350	11	352849	EVO8_	snp	T	G	20	85	Clone variant, promoter	Putative mannosidase; GPI-anchored membrane protein required for cell wall biosynthesis in bud formation;homologous to Dfg5p
YER159C	S000000961	BUR6	429	5	492180	EVO4_	indel	C	+A	25	16	Clone variant, promoter	Subunit of a heterodimeric NC2 transcription regulator complex; complex binds to TBP and can repress transcription by preventing preinitiation complex assembly or stimulate activated transcription; homologous to human NC2alpha; complex also includes Ncb2p; bur6 ncb2 double mutation is functionally complemented by coexpression of human DRAP1 and DR1, although the single bur6 mutation is not comple…
YER159C	S000000961	BUR6	429	5	492180	EVO1_	indel	C	+A	60	5	Clone variant, promoter	Subunit of a heterodimeric NC2 transcription regulator complex; complex binds to TBP and can repress transcription by preventing preinitiation complex assembly or stimulate activated transcription; homologous to human NC2alpha; complex also includes Ncb2p; bur6 ncb2 double mutation is functionally complemented by coexpression of human DRAP1 and DR1, although the single bur6 mutation is not comple…
YER159C	S000000961	BUR6	429	5	492180	EVO3_	snp	C	A	27	11	Clone variant, promoter	Subunit of a heterodimeric NC2 transcription regulator complex; complex binds to TBP and can repress transcription by preventing preinitiation complex assembly or stimulate activated transcription; homologous to human NC2alpha; complex also includes Ncb2p; bur6 ncb2 double mutation is functionally complemented by coexpression of human DRAP1 and DR1, although the single bur6 mutation is not comple…
YER159C	S000000961	BUR6	429	5	492018	EVO6_	snp	G	T	21	14	Clone variant, promoter	Subunit of a heterodimeric NC2 transcription regulator complex; complex binds to TBP and can repress transcription by preventing preinitiation complex assembly or stimulate activated transcription; homologous to human NC2alpha; complex also includes Ncb2p; bur6 ncb2 double mutation is functionally complemented by coexpression of human DRAP1 and DR1, although the single bur6 mutation is not comple…
YLR277C	S000004267	YSH1	2340	12	699894	EVO2_	snp	C	A	50	4	Clone variant, promoter	Endoribonuclease; subunit of the mRNA cleavage and polyadenylation specificity complex; required for 3' processing, splicing, and transcriptional termination of mRNAs and snoRNAs; protein abundance increases in response to DNA replication stress; YSH1 has a paralog, SYC1, that arose from the whole genome duplication
YGL006W	S000002974	PMC1	3522	7	485898	EVO4_	snp	T	A	27	11	Clone variant, promoter	Vacuolar Ca2+ ATPase involved in depleting cytosol of Ca2+ ions; prevents growth inhibition by activation of calcineurin in the presence of elevated concentrations of calcium; similar to mammalian PMCA1a
YGL006W	S000002974	PMC1	3522	7	485900	EVO2_	snp	T	G	20	10	Clone variant, promoter	Vacuolar Ca2+ ATPase involved in depleting cytosol of Ca2+ ions; prevents growth inhibition by activation of calcineurin in the presence of elevated concentrations of calcium; similar to mammalian PMCA1a
YGL006W	S000002974	PMC1	3522	7	485909	EVO4_	snp	C	A	20	10	Clone variant, promoter	Vacuolar Ca2+ ATPase involved in depleting cytosol of Ca2+ ions; prevents growth inhibition by activation of calcineurin in the presence of elevated concentrations of calcium; similar to mammalian PMCA1a
YGL006W	S000002974	PMC1	3522	7	485883	EVO8_	indel	T	-A	22	9	Clone variant, promoter	Vacuolar Ca2+ ATPase involved in depleting cytosol of Ca2+ ions; prevents growth inhibition by activation of calcineurin in the presence of elevated concentrations of calcium; similar to mammalian PMCA1a
YGL006W	S000002974	PMC1	3522	7	485909	EVO5_	snp	C	A	29	7	Clone variant, promoter	Vacuolar Ca2+ ATPase involved in depleting cytosol of Ca2+ ions; prevents growth inhibition by activation of calcineurin in the presence of elevated concentrations of calcium; similar to mammalian PMCA1a
YMR292W	S000004906	GOT1	499	13	854417	EVO1_	snp	C	T	22	9	Clone variant, promoter	Homodimeric protein that is packaged into COPII vesicles; cycles between the ER and Golgi; involved in secretory transport but not directly required for aspects of transport assayed in vitro; may influence membrane composition
YMR292W	S000004906	GOT1	499	13	854510	EVO2_	snp	G	T	40	5	Clone variant, promoter	Homodimeric protein that is packaged into COPII vesicles; cycles between the ER and Golgi; involved in secretory transport but not directly required for aspects of transport assayed in vitro; may influence membrane composition
YLR436C	S000004428	ECM30	3825	12	1011371	EVO4_	indel	C	-T	38	13	Clone variant, promoter	Protein of unknown function; may play a role in cell wall biosynthesis, mutants have abormal relative levels of mannose and glucose and have Gap1p sorting and transport defects; (GFP)-fusion protein localizes to the cytoplasm
YLR436C	S000004428	ECM30	3825	12	1011371	EVO1_	indel	C	-T	32	19	Clone variant, promoter	Protein of unknown function; may play a role in cell wall biosynthesis, mutants have abormal relative levels of mannose and glucose and have Gap1p sorting and transport defects; (GFP)-fusion protein localizes to the cytoplasm
YLR436C	S000004428	ECM30	3825	12	1011371	EVO3_	indel	C	-T	30	10	Clone variant, promoter	Protein of unknown function; may play a role in cell wall biosynthesis, mutants have abormal relative levels of mannose and glucose and have Gap1p sorting and transport defects; (GFP)-fusion protein localizes to the cytoplasm
YBR169C	S000000373	SSE2	2082	2	576025	EVO3_	snp	C	A	33	24	Clone variant, promoter	Member of Hsp110 subclass of the heat shock protein 70 (HSP70) family; serves as nucleotide exchange factor to load ATP onto the SSA class of cytosolic Hsp70s; may be involved in protein folding; localized to the cytoplasm; SSE2 has a paralog, SSE1, that arose from the whole genome duplication
YCR066W	S000000662	RAD18	1464	3	231025	EVO2_	snp	A	T	22	9	Clone variant, promoter	E3 ubiquitin ligase; forms heterodimer with Rad6p to monoubiquitinate PCNA-K164; heterodimer binds single-stranded DNA and has single-stranded DNA dependent ATPase activity; required for postreplication repair; SUMO-targeted ubiquitin ligase (STUbl) that contains a SUMO-interacting motif (SIM) which stimulates its ubiquitin ligase activity towards the sumoylated form of PCNA
YCR066W	S000000662	RAD18	1464	3	231030	EVO2_	snp	C	T	20	15	Clone variant, promoter	E3 ubiquitin ligase; forms heterodimer with Rad6p to monoubiquitinate PCNA-K164; heterodimer binds single-stranded DNA and has single-stranded DNA dependent ATPase activity; required for postreplication repair; SUMO-targeted ubiquitin ligase (STUbl) that contains a SUMO-interacting motif (SIM) which stimulates its ubiquitin ligase activity towards the sumoylated form of PCNA
YCR066W	S000000662	RAD18	1464	3	231053	EVO1_	snp	A	C	27	15	Clone variant, promoter	E3 ubiquitin ligase; forms heterodimer with Rad6p to monoubiquitinate PCNA-K164; heterodimer binds single-stranded DNA and has single-stranded DNA dependent ATPase activity; required for postreplication repair; SUMO-targeted ubiquitin ligase (STUbl) that contains a SUMO-interacting motif (SIM) which stimulates its ubiquitin ligase activity towards the sumoylated form of PCNA
YCR066W	S000000662	RAD18	1464	3	231025	EVO6_	snp	A	C	22	9	Clone variant, promoter	E3 ubiquitin ligase; forms heterodimer with Rad6p to monoubiquitinate PCNA-K164; heterodimer binds single-stranded DNA and has single-stranded DNA dependent ATPase activity; required for postreplication repair; SUMO-targeted ubiquitin ligase (STUbl) that contains a SUMO-interacting motif (SIM) which stimulates its ubiquitin ligase activity towards the sumoylated form of PCNA
YCR066W	S000000662	RAD18	1464	3	231045	EVO6_	snp	A	C	30	10	Clone variant, promoter	E3 ubiquitin ligase; forms heterodimer with Rad6p to monoubiquitinate PCNA-K164; heterodimer binds single-stranded DNA and has single-stranded DNA dependent ATPase activity; required for postreplication repair; SUMO-targeted ubiquitin ligase (STUbl) that contains a SUMO-interacting motif (SIM) which stimulates its ubiquitin ligase activity towards the sumoylated form of PCNA
YNR067C	S000005350	DSE4	3354	14	759591	EVO4_	snp	G	T	28	54	Clone variant, promoter	Daughter cell-specific secreted protein with similarity to glucanases; degrades cell wall from the daughter side causing daughter to separate from mother
YHL048W	S000001040	COS8	1146	8	5680	EVO2_	snp	A	G	33	171	Clone variant, promoter	Endosomal protein involved in turnover of plasma membrane proteins; member of the DUP380 subfamily of conserved, often subtelomeric COS genes; required for the multivesicular vesicle body sorting pathway that internalizes plasma membrane proteins for degradation; Cos proteins provide ubiquitin in trans for nonubiquitinated cargo proteins
YHL048W	S000001040	COS8	1146	8	5680	EVO4_	snp	A	G	34	151	Clone variant, promoter	Endosomal protein involved in turnover of plasma membrane proteins; member of the DUP380 subfamily of conserved, often subtelomeric COS genes; required for the multivesicular vesicle body sorting pathway that internalizes plasma membrane proteins for degradation; Cos proteins provide ubiquitin in trans for nonubiquitinated cargo proteins
YHL048W	S000001040	COS8	1146	8	5680	EVO1_	snp	A	G	36	170	Clone variant, promoter	Endosomal protein involved in turnover of plasma membrane proteins; member of the DUP380 subfamily of conserved, often subtelomeric COS genes; required for the multivesicular vesicle body sorting pathway that internalizes plasma membrane proteins for degradation; Cos proteins provide ubiquitin in trans for nonubiquitinated cargo proteins
YHL048W	S000001040	COS8	1146	8	5705	EVO2_	snp	C	T	24	155	Clone variant, promoter	Endosomal protein involved in turnover of plasma membrane proteins; member of the DUP380 subfamily of conserved, often subtelomeric COS genes; required for the multivesicular vesicle body sorting pathway that internalizes plasma membrane proteins for degradation; Cos proteins provide ubiquitin in trans for nonubiquitinated cargo proteins
YHL048W	S000001040	COS8	1146	8	5705	EVO4_	snp	C	T	25	139	Clone variant, promoter	Endosomal protein involved in turnover of plasma membrane proteins; member of the DUP380 subfamily of conserved, often subtelomeric COS genes; required for the multivesicular vesicle body sorting pathway that internalizes plasma membrane proteins for degradation; Cos proteins provide ubiquitin in trans for nonubiquitinated cargo proteins
YHL048W	S000001040	COS8	1146	8	5705	EVO1_	snp	C	T	26	154	Clone variant, promoter	Endosomal protein involved in turnover of plasma membrane proteins; member of the DUP380 subfamily of conserved, often subtelomeric COS genes; required for the multivesicular vesicle body sorting pathway that internalizes plasma membrane proteins for degradation; Cos proteins provide ubiquitin in trans for nonubiquitinated cargo proteins
YHL048W	S000001040	COS8	1146	8	5708	EVO2_	snp	C	G	23	154	Clone variant, promoter	Endosomal protein involved in turnover of plasma membrane proteins; member of the DUP380 subfamily of conserved, often subtelomeric COS genes; required for the multivesicular vesicle body sorting pathway that internalizes plasma membrane proteins for degradation; Cos proteins provide ubiquitin in trans for nonubiquitinated cargo proteins
YHL048W	S000001040	COS8	1146	8	5708	EVO4_	snp	C	G	23	138	Clone variant, promoter	Endosomal protein involved in turnover of plasma membrane proteins; member of the DUP380 subfamily of conserved, often subtelomeric COS genes; required for the multivesicular vesicle body sorting pathway that internalizes plasma membrane proteins for degradation; Cos proteins provide ubiquitin in trans for nonubiquitinated cargo proteins
YHL048W	S000001040	COS8	1146	8	5708	EVO1_	snp	C	G	25	149	Clone variant, promoter	Endosomal protein involved in turnover of plasma membrane proteins; member of the DUP380 subfamily of conserved, often subtelomeric COS genes; required for the multivesicular vesicle body sorting pathway that internalizes plasma membrane proteins for degradation; Cos proteins provide ubiquitin in trans for nonubiquitinated cargo proteins
YHL048W	S000001040	COS8	1146	8	5709	EVO2_	snp	C	T	23	154	Clone variant, promoter	Endosomal protein involved in turnover of plasma membrane proteins; member of the DUP380 subfamily of conserved, often subtelomeric COS genes; required for the multivesicular vesicle body sorting pathway that internalizes plasma membrane proteins for degradation; Cos proteins provide ubiquitin in trans for nonubiquitinated cargo proteins
YHL048W	S000001040	COS8	1146	8	5709	EVO4_	snp	C	T	23	138	Clone variant, promoter	Endosomal protein involved in turnover of plasma membrane proteins; member of the DUP380 subfamily of conserved, often subtelomeric COS genes; required for the multivesicular vesicle body sorting pathway that internalizes plasma membrane proteins for degradation; Cos proteins provide ubiquitin in trans for nonubiquitinated cargo proteins
YHL048W	S000001040	COS8	1146	8	5709	EVO1_	snp	C	T	25	149	Clone variant, promoter	Endosomal protein involved in turnover of plasma membrane proteins; member of the DUP380 subfamily of conserved, often subtelomeric COS genes; required for the multivesicular vesicle body sorting pathway that internalizes plasma membrane proteins for degradation; Cos proteins provide ubiquitin in trans for nonubiquitinated cargo proteins
YHL048W	S000001040	COS8	1146	8	5713	EVO2_	snp	C	T	24	149	Clone variant, promoter	Endosomal protein involved in turnover of plasma membrane proteins; member of the DUP380 subfamily of conserved, often subtelomeric COS genes; required for the multivesicular vesicle body sorting pathway that internalizes plasma membrane proteins for degradation; Cos proteins provide ubiquitin in trans for nonubiquitinated cargo proteins
YHL048W	S000001040	COS8	1146	8	5713	EVO4_	snp	C	T	23	137	Clone variant, promoter	Endosomal protein involved in turnover of plasma membrane proteins; member of the DUP380 subfamily of conserved, often subtelomeric COS genes; required for the multivesicular vesicle body sorting pathway that internalizes plasma membrane proteins for degradation; Cos proteins provide ubiquitin in trans for nonubiquitinated cargo proteins
YHL048W	S000001040	COS8	1146	8	5713	EVO1_	snp	C	T	25	148	Clone variant, promoter	Endosomal protein involved in turnover of plasma membrane proteins; member of the DUP380 subfamily of conserved, often subtelomeric COS genes; required for the multivesicular vesicle body sorting pathway that internalizes plasma membrane proteins for degradation; Cos proteins provide ubiquitin in trans for nonubiquitinated cargo proteins
YHL048W	S000001040	COS8	1146	8	5714	EVO2_	snp	C	T	25	149	Clone variant, promoter	Endosomal protein involved in turnover of plasma membrane proteins; member of the DUP380 subfamily of conserved, often subtelomeric COS genes; required for the multivesicular vesicle body sorting pathway that internalizes plasma membrane proteins for degradation; Cos proteins provide ubiquitin in trans for nonubiquitinated cargo proteins
YHL048W	S000001040	COS8	1146	8	5714	EVO4_	snp	C	T	24	132	Clone variant, promoter	Endosomal protein involved in turnover of plasma membrane proteins; member of the DUP380 subfamily of conserved, often subtelomeric COS genes; required for the multivesicular vesicle body sorting pathway that internalizes plasma membrane proteins for degradation; Cos proteins provide ubiquitin in trans for nonubiquitinated cargo proteins
YHL048W	S000001040	COS8	1146	8	5714	EVO1_	snp	C	T	25	148	Clone variant, promoter	Endosomal protein involved in turnover of plasma membrane proteins; member of the DUP380 subfamily of conserved, often subtelomeric COS genes; required for the multivesicular vesicle body sorting pathway that internalizes plasma membrane proteins for degradation; Cos proteins provide ubiquitin in trans for nonubiquitinated cargo proteins
YHL048W	S000001040	COS8	1146	8	6037	EVO1_	snp	A	G	25	16	Clone variant, promoter	Endosomal protein involved in turnover of plasma membrane proteins; member of the DUP380 subfamily of conserved, often subtelomeric COS genes; required for the multivesicular vesicle body sorting pathway that internalizes plasma membrane proteins for degradation; Cos proteins provide ubiquitin in trans for nonubiquitinated cargo proteins
YHL048W	S000001040	COS8	1146	8	6042	EVO1_	indel	A	+T	29	14	Clone variant, promoter	Endosomal protein involved in turnover of plasma membrane proteins; member of the DUP380 subfamily of conserved, often subtelomeric COS genes; required for the multivesicular vesicle body sorting pathway that internalizes plasma membrane proteins for degradation; Cos proteins provide ubiquitin in trans for nonubiquitinated cargo proteins
YHL048W	S000001040	COS8	1146	8	6047	EVO1_	snp	A	G	27	15	Clone variant, promoter	Endosomal protein involved in turnover of plasma membrane proteins; member of the DUP380 subfamily of conserved, often subtelomeric COS genes; required for the multivesicular vesicle body sorting pathway that internalizes plasma membrane proteins for degradation; Cos proteins provide ubiquitin in trans for nonubiquitinated cargo proteins
YHL048W	S000001040	COS8	1146	8	6052	EVO2_	snp	T	C	20	15	Clone variant, promoter	Endosomal protein involved in turnover of plasma membrane proteins; member of the DUP380 subfamily of conserved, often subtelomeric COS genes; required for the multivesicular vesicle body sorting pathway that internalizes plasma membrane proteins for degradation; Cos proteins provide ubiquitin in trans for nonubiquitinated cargo proteins
YHL048W	S000001040	COS8	1146	8	6052	EVO1_	snp	T	C	27	15	Clone variant, promoter	Endosomal protein involved in turnover of plasma membrane proteins; member of the DUP380 subfamily of conserved, often subtelomeric COS genes; required for the multivesicular vesicle body sorting pathway that internalizes plasma membrane proteins for degradation; Cos proteins provide ubiquitin in trans for nonubiquitinated cargo proteins
YHL048W	S000001040	COS8	1146	8	6082	EVO1_	snp	T	A	42	24	Clone variant, promoter	Endosomal protein involved in turnover of plasma membrane proteins; member of the DUP380 subfamily of conserved, often subtelomeric COS genes; required for the multivesicular vesicle body sorting pathway that internalizes plasma membrane proteins for degradation; Cos proteins provide ubiquitin in trans for nonubiquitinated cargo proteins
YHL048W	S000001040	COS8	1146	8	6087	EVO1_	snp	C	T	38	29	Clone variant, promoter	Endosomal protein involved in turnover of plasma membrane proteins; member of the DUP380 subfamily of conserved, often subtelomeric COS genes; required for the multivesicular vesicle body sorting pathway that internalizes plasma membrane proteins for degradation; Cos proteins provide ubiquitin in trans for nonubiquitinated cargo proteins
YHL048W	S000001040	COS8	1146	8	6104	EVO1_	snp	A	T	37	30	Clone variant, promoter	Endosomal protein involved in turnover of plasma membrane proteins; member of the DUP380 subfamily of conserved, often subtelomeric COS genes; required for the multivesicular vesicle body sorting pathway that internalizes plasma membrane proteins for degradation; Cos proteins provide ubiquitin in trans for nonubiquitinated cargo proteins
YHL048W	S000001040	COS8	1146	8	6114	EVO1_	snp	C	T	38	34	Clone variant, promoter	Endosomal protein involved in turnover of plasma membrane proteins; member of the DUP380 subfamily of conserved, often subtelomeric COS genes; required for the multivesicular vesicle body sorting pathway that internalizes plasma membrane proteins for degradation; Cos proteins provide ubiquitin in trans for nonubiquitinated cargo proteins
YHL048W	S000001040	COS8	1146	8	6116	EVO1_	snp	C	T	37	35	Clone variant, promoter	Endosomal protein involved in turnover of plasma membrane proteins; member of the DUP380 subfamily of conserved, often subtelomeric COS genes; required for the multivesicular vesicle body sorting pathway that internalizes plasma membrane proteins for degradation; Cos proteins provide ubiquitin in trans for nonubiquitinated cargo proteins
YHL048W	S000001040	COS8	1146	8	6118	EVO1_	snp	G	C	37	35	Clone variant, promoter	Endosomal protein involved in turnover of plasma membrane proteins; member of the DUP380 subfamily of conserved, often subtelomeric COS genes; required for the multivesicular vesicle body sorting pathway that internalizes plasma membrane proteins for degradation; Cos proteins provide ubiquitin in trans for nonubiquitinated cargo proteins
YHL048W	S000001040	COS8	1146	8	6123	EVO1_	snp	G	A	36	36	Clone variant, promoter	Endosomal protein involved in turnover of plasma membrane proteins; member of the DUP380 subfamily of conserved, often subtelomeric COS genes; required for the multivesicular vesicle body sorting pathway that internalizes plasma membrane proteins for degradation; Cos proteins provide ubiquitin in trans for nonubiquitinated cargo proteins
YHL048W	S000001040	COS8	1146	8	6144	EVO1_	snp	A	G	44	32	Clone variant, promoter	Endosomal protein involved in turnover of plasma membrane proteins; member of the DUP380 subfamily of conserved, often subtelomeric COS genes; required for the multivesicular vesicle body sorting pathway that internalizes plasma membrane proteins for degradation; Cos proteins provide ubiquitin in trans for nonubiquitinated cargo proteins
YHL048W	S000001040	COS8	1146	8	6148	EVO1_	snp	T	G	53	30	Clone variant, promoter	Endosomal protein involved in turnover of plasma membrane proteins; member of the DUP380 subfamily of conserved, often subtelomeric COS genes; required for the multivesicular vesicle body sorting pathway that internalizes plasma membrane proteins for degradation; Cos proteins provide ubiquitin in trans for nonubiquitinated cargo proteins
YPL155C	S000006076	KIP2	2121	16	259595	EVO2_	snp	G	A	30	10	Clone variant, promoter	Kinesin-related motor protein involved in mitotic spindle positioning; stabilizes microtubules by targeting Bik1p to the plus end; functions as a microtubule polymerase and catastrophe inhibitor in vitro; Kip2p levels are controlled during the cell cycle
YGL216W	S000003184	KIP3	2418	7	84762	EVO2_	indel	C	-T	30	10	Clone variant, promoter	Kinesin-related antiparallel sliding motor protein; involved in mitotic spindle positioning; sliding activity promotes bipolar spindle assembly and maintenance of genome stability; inhibits spindle elongation, destabilizing late anaphase spindle microtubules that polymerize beyond the midzone
YGR138C	S000003370	TPO2	1845	7	765792	EVO1_	snp	A	T	33	6	Clone variant, promoter	Polyamine transporter of the major facilitator superfamily; member of the 12-spanner drug:H(+) antiporter DHA1 family; specific for spermine; localizes to the plasma membrane; transcription of TPO2 is regulated by Haa1p; TPO2 has a paralog, TPO3, that arose from the whole genome duplication
YGR138C	S000003370	TPO2	1845	7	765718	EVO8_	snp	T	A	25	8	Clone variant, promoter	Polyamine transporter of the major facilitator superfamily; member of the 12-spanner drug:H(+) antiporter DHA1 family; specific for spermine; localizes to the plasma membrane; transcription of TPO2 is regulated by Haa1p; TPO2 has a paralog, TPO3, that arose from the whole genome duplication
YLL028W	S000003951	TPO1	1761	12	84624	EVO4_	snp	C	T	100	63	Clone variant, promoter	Polyamine transporter of the major facilitator superfamily; member of the 12-spanner drug:H(+) antiporter DHA1 family; recognizes spermine, putrescine, and spermidine; catalyzes uptake of polyamines at alkaline pH and excretion at acidic pH; during oxidative stress exports spermine, spermidine from the cell, which controls timing of expression of stress-responsive genes; phosphorylation enhances …
YLL028W	S000003951	TPO1	1761	12	86722	EVO3_	snp	T	A	50	6	Clone variant, other	Polyamine transporter of the major facilitator superfamily; member of the 12-spanner drug:H(+) antiporter DHA1 family; recognizes spermine, putrescine, and spermidine; catalyzes uptake of polyamines at alkaline pH and excretion at acidic pH; during oxidative stress exports spermine, spermidine from the cell, which controls timing of expression of stress-responsive genes; phosphorylation enhances …
YLL028W	S000003951	TPO1	1761	12	86741	EVO5_	snp	C	A	25	12	Clone variant, other	Polyamine transporter of the major facilitator superfamily; member of the 12-spanner drug:H(+) antiporter DHA1 family; recognizes spermine, putrescine, and spermidine; catalyzes uptake of polyamines at alkaline pH and excretion at acidic pH; during oxidative stress exports spermine, spermidine from the cell, which controls timing of expression of stress-responsive genes; phosphorylation enhances …
YDR049W	S000002456	VMS1	1899	4	553087	EVO3_	snp	A	T	22	9	Clone variant, promoter	Component of a Cdc48p-complex involved in protein quality control; exhibits cytosolic and ER-membrane localization, with Cdc48p, during normal growth, and contributes to ER-associated degradation (ERAD) of specific substrates at a step after their ubiquitination; forms a mitochondrially-associated complex with Cdc48p and Npl4p under oxidative stress that is required for ubiquitin-mediated mitocho…
YDR049W	S000002456	VMS1	1899	4	553093	EVO3_	snp	A	T	22	9	Clone variant, promoter	Component of a Cdc48p-complex involved in protein quality control; exhibits cytosolic and ER-membrane localization, with Cdc48p, during normal growth, and contributes to ER-associated degradation (ERAD) of specific substrates at a step after their ubiquitination; forms a mitochondrially-associated complex with Cdc48p and Npl4p under oxidative stress that is required for ubiquitin-mediated mitocho…
YDR049W	S000002456	VMS1	1899	4	553099	EVO4_	snp	G	T	33	6	Clone variant, promoter	Component of a Cdc48p-complex involved in protein quality control; exhibits cytosolic and ER-membrane localization, with Cdc48p, during normal growth, and contributes to ER-associated degradation (ERAD) of specific substrates at a step after their ubiquitination; forms a mitochondrially-associated complex with Cdc48p and Npl4p under oxidative stress that is required for ubiquitin-mediated mitocho…
YDR049W	S000002456	VMS1	1899	4	553093	EVO7_	snp	A	T	60	5	Clone variant, promoter	Component of a Cdc48p-complex involved in protein quality control; exhibits cytosolic and ER-membrane localization, with Cdc48p, during normal growth, and contributes to ER-associated degradation (ERAD) of specific substrates at a step after their ubiquitination; forms a mitochondrially-associated complex with Cdc48p and Npl4p under oxidative stress that is required for ubiquitin-mediated mitocho…
YMR210W	S000004823	S000004823	1350	13	687383	EVO3_	snp	G	T	20	15	Clone variant, promoter	Monoacylglycerol and triacylglycerol lipase; MAG lipase with preference for palmitoyl-MAG; TAG lipase involved in TAG catabolism; minor role in medium-chain fatty acid ethyl ester biosynthesis; contains an alpha/beta hydrolase domain and a typical lipase motif (GXSXG); similar to acyltransferases, Eeb1p, Eht1p, and human ABHD1
YDR185C	S000002593	UPS3	540	4	832716	EVO4_	indel	C	-A	20	15	Clone variant, promoter	Mitochondrial protein of unknown function; similar to Ups1p and Ups2p which are involved in regulation of mitochondrial cardiolipin and phosphatidylethanolamine levels; null is viable but interacts synthetically with ups1 and ups2 mutations; UPS3 has a paralog, UPS2, that arose from the whole genome duplication
YDR185C	S000002593	UPS3	540	4	832716	EVO1_	indel	C	+A	33	12	Clone variant, promoter	Mitochondrial protein of unknown function; similar to Ups1p and Ups2p which are involved in regulation of mitochondrial cardiolipin and phosphatidylethanolamine levels; null is viable but interacts synthetically with ups1 and ups2 mutations; UPS3 has a paralog, UPS2, that arose from the whole genome duplication
YPR140W	S000006344	TAZ1	1146	16	814356	EVO3_	indel	T	-C	25	8	Clone variant, promoter	Lyso-phosphatidylcholine acyltransferase; required for normal phospholipid content of mitochondrial membranes; major determinant of the final acyl chain composition of the mitochondrial-specific phospholipid cardiolipin; mutations in human ortholog tafazzin (TAZ) cause Barth syndrome, a rare X-linked disease characterized by skeletal and cardiomyopathy and bouts of cyclic neutropenia; a specific …
YPR140W	S000006344	TAZ1	1146	16	814357	EVO3_	indel	C	-A	29	7	Clone variant, promoter	Lyso-phosphatidylcholine acyltransferase; required for normal phospholipid content of mitochondrial membranes; major determinant of the final acyl chain composition of the mitochondrial-specific phospholipid cardiolipin; mutations in human ortholog tafazzin (TAZ) cause Barth syndrome, a rare X-linked disease characterized by skeletal and cardiomyopathy and bouts of cyclic neutropenia; a specific …
YBL052C	S000000148	SAS3	2496	2	122376	EVO1_	snp	C	A	23	13	Clone variant, promoter	Histone acetyltransferase catalytic subunit of NuA3 complex; acetylates histone H3, involved in transcriptional silencing; homolog of the mammalian MOZ proto-oncogene; mutant has aneuploidy tolerance; sas3gcn5 double mutation is lethal
YBL052C	S000000148	SAS3	2496	2	122604	EVO4_	snp	A	T	50	4	Clone variant, promoter	Histone acetyltransferase catalytic subunit of NuA3 complex; acetylates histone H3, involved in transcriptional silencing; homolog of the mammalian MOZ proto-oncogene; mutant has aneuploidy tolerance; sas3gcn5 double mutation is lethal
YBL052C	S000000148	SAS3	2496	2	122604	EVO8_	snp	A	T	25	8	Clone variant, promoter	Histone acetyltransferase catalytic subunit of NuA3 complex; acetylates histone H3, involved in transcriptional silencing; homolog of the mammalian MOZ proto-oncogene; mutant has aneuploidy tolerance; sas3gcn5 double mutation is lethal
YIL066C	S000001328	RNR3	2610	9	241010	EVO4_	snp	T	A	22	9	Clone variant, promoter	Minor isoform of large subunit of ribonucleotide-diphosphate reductase; the RNR complex catalyzes rate-limiting step in dNTP synthesis, regulated by DNA replication and DNA damage checkpoint pathways via localization of small subunits; RNR3 has a paralog, RNR1, that arose from the whole genome duplication
YIL066C	S000001328	RNR3	2610	9	241030	EVO7_	snp	C	A	25	8	Clone variant, promoter	Minor isoform of large subunit of ribonucleotide-diphosphate reductase; the RNR complex catalyzes rate-limiting step in dNTP synthesis, regulated by DNA replication and DNA damage checkpoint pathways via localization of small subunits; RNR3 has a paralog, RNR1, that arose from the whole genome duplication
YBR074W	S000000278	S000000278	2931	2	386226	EVO4_	snp	T	A	22	9	Clone variant, promoter	Multi-spanning vacuolar membrane protease; glycosylated transmembrane protein bearing homology to the M28 family of metalloproteases; has a lumenal-facing protease domain; proposed role in vacuole physiology
YBR074W	S000000278	S000000278	2931	2	386245	EVO7_	snp	C	A	29	7	Clone variant, promoter	Multi-spanning vacuolar membrane protease; glycosylated transmembrane protein bearing homology to the M28 family of metalloproteases; has a lumenal-facing protease domain; proposed role in vacuole physiology
YBR074W	S000000278	S000000278	2931	2	386253	EVO7_	snp	T	A	22	9	Clone variant, promoter	Multi-spanning vacuolar membrane protease; glycosylated transmembrane protein bearing homology to the M28 family of metalloproteases; has a lumenal-facing protease domain; proposed role in vacuole physiology
YNL339C	S000005283	YRF1-6	5728	14	6630	EVO4_	indel	C	-CA	23	44	Clone variant, promoter	Helicase encoded by the Y' element of subtelomeric regions; highly expressed in the mutants lacking the telomerase component TLC1; potentially phosphorylated by Cdc28p
YNL339C	S000005283	YRF1-6	5728	14	6623	EVO7_	indel	C	+ACA	39	51	Clone variant, promoter	Helicase encoded by the Y' element of subtelomeric regions; highly expressed in the mutants lacking the telomerase component TLC1; potentially phosphorylated by Cdc28p
YNL339C	S000005283	YRF1-6	5728	14	6623	EVO6_	indel	C	+ACA	37	65	Clone variant, promoter	Helicase encoded by the Y' element of subtelomeric regions; highly expressed in the mutants lacking the telomerase component TLC1; potentially phosphorylated by Cdc28p
YGL057C	S000003025	GEP7	864	7	395923	EVO1_	snp	T	A	20	25	Clone variant, promoter	Protein of unknown function; null mutant exhibits a respiratory growth defect and synthetic interactions with prohibitin (phb1) and gem1; authentic, non-tagged protein is detected in highly purified mitochondria in high-throughput studies
YGL057C	S000003025	GEP7	864	7	394899	EVO6_	indel	G	-A	25	8	Clone variant, other	Protein of unknown function; null mutant exhibits a respiratory growth defect and synthetic interactions with prohibitin (phb1) and gem1; authentic, non-tagged protein is detected in highly purified mitochondria in high-throughput studies
YOR198C	S000005724	BFR1	1413	15	720216	EVO2_	snp	G	A	20	10	Clone variant, promoter	Component of mRNP complexes associated with polyribosomes; involved in localization of mRNAs to P bodies; implicated in secretion and nuclear segregation; multicopy suppressor of BFA (Brefeldin A) sensitivity
YER072W	S000000874	VTC1	390	5	302122	EVO4_	snp	C	A	25	59	Clone variant, promoter	Regulatory subunit of the vacuolar transporter chaperone (VTC) complex; VTC complex is involved in membrane trafficking, vacuolar polyphosphate accumulation, microautophagy and non-autophagic vacuolar fusion; also has mRNA binding activity; protein abundance increases in response to DNA replication stress
YER074W	S000000876	RPS24A	874	5	305696	EVO3_	snp	T	A	22	9	Clone variant, promoter	Protein component of the small (40S) ribosomal subunit; homologous to mammalian ribosomal protein S24, no bacterial homolog; RPS24A has a paralog, RPS24B, that arose from the whole genome duplication
YER074W	S000000876	RPS24A	874	5	305798	EVO4_	indel	C	+T	25	8	Clone variant, promoter	Protein component of the small (40S) ribosomal subunit; homologous to mammalian ribosomal protein S24, no bacterial homolog; RPS24A has a paralog, RPS24B, that arose from the whole genome duplication
YER074W	S000000876	RPS24A	874	5	305694	EVO5_	snp	T	A	33	9	Clone variant, promoter	Protein component of the small (40S) ribosomal subunit; homologous to mammalian ribosomal protein S24, no bacterial homolog; RPS24A has a paralog, RPS24B, that arose from the whole genome duplication
YER074W	S000000876	RPS24A	874	5	305798	EVO5_	indel	C	-T	40	5	Clone variant, promoter	Protein component of the small (40S) ribosomal subunit; homologous to mammalian ribosomal protein S24, no bacterial homolog; RPS24A has a paralog, RPS24B, that arose from the whole genome duplication
YML059C	S000004524	NTE1	5040	13	158365	EVO2_	snp	T	G	22	9	Clone variant, promoter	Serine esterase; homolog of human neuropathy target esterase (NTE); Nte1p-mediated phosphatidylcholine turnover influences transcription factor Opi1p localization, affecting transcriptional regulation of phospholipid biosynthesis genes
YGL178W	S000003146	MPT5	3220	7	167239	EVO4_	snp	G	A	25	12	Clone variant, promoter	mRNA-binding protein of the PUF family; binds to specific mRNAs, often in the 3' UTR; has broad specificity and binds to more than 1000 mRNAs (16% of the transcriptome); recruits the CCR4-NOT deadenylase complex to mRNAs along with Dhh1p and Dcp1p to promote deadenylation, decapping, and decay; also interacts with the Caf20p translational initiation repressor, affecting its mRNA target specificity
YGL178W	S000003146	MPT5	3220	7	167241	EVO4_	snp	T	A	30	10	Clone variant, promoter	mRNA-binding protein of the PUF family; binds to specific mRNAs, often in the 3' UTR; has broad specificity and binds to more than 1000 mRNAs (16% of the transcriptome); recruits the CCR4-NOT deadenylase complex to mRNAs along with Dhh1p and Dcp1p to promote deadenylation, decapping, and decay; also interacts with the Caf20p translational initiation repressor, affecting its mRNA target specificity
YGL178W	S000003146	MPT5	3220	7	167248	EVO2_	snp	C	A	22	9	Clone variant, promoter	mRNA-binding protein of the PUF family; binds to specific mRNAs, often in the 3' UTR; has broad specificity and binds to more than 1000 mRNAs (16% of the transcriptome); recruits the CCR4-NOT deadenylase complex to mRNAs along with Dhh1p and Dcp1p to promote deadenylation, decapping, and decay; also interacts with the Caf20p translational initiation repressor, affecting its mRNA target specificity
YGL178W	S000003146	MPT5	3220	7	167248	EVO3_	snp	C	A	33	6	Clone variant, promoter	mRNA-binding protein of the PUF family; binds to specific mRNAs, often in the 3' UTR; has broad specificity and binds to more than 1000 mRNAs (16% of the transcriptome); recruits the CCR4-NOT deadenylase complex to mRNAs along with Dhh1p and Dcp1p to promote deadenylation, decapping, and decay; also interacts with the Caf20p translational initiation repressor, affecting its mRNA target specificity
YGL178W	S000003146	MPT5	3220	7	167239	EVO7_	snp	G	A	20	10	Clone variant, promoter	mRNA-binding protein of the PUF family; binds to specific mRNAs, often in the 3' UTR; has broad specificity and binds to more than 1000 mRNAs (16% of the transcriptome); recruits the CCR4-NOT deadenylase complex to mRNAs along with Dhh1p and Dcp1p to promote deadenylation, decapping, and decay; also interacts with the Caf20p translational initiation repressor, affecting its mRNA target specificity
YJL091C	S000003627	GWT1	1473	10	263247	EVO3_	indel	G	+T	97	34	Clone variant, promoter	Protein involved in the inositol acylation of GlcN-PI; the inositol acylation of glucosaminyl phosphatidylinositol (GlcN-PI) forms glucosaminyl(acyl)phosphatidylinositol (GlcN(acyl)PI), an intermediate in the biosynthesis of glycosylphosphatidylinositol (GPI) anchors
YPR022C	S000006226	S000006226	3402	16	607403	EVO3_	snp	C	A	20	10	Clone variant, promoter	Putative transcription factor, as suggested by computational analysis; green fluorescent protein (GFP)-fusion protein localizes to both the cytoplasm and the nucleus and is induced in response to the DNA-damaging agent MMS; overproduction of a truncation allele suppresses lethality due to expression of the dominant PET9 allele AAC2-A128P
YPR022C	S000006226	S000006226	3402	16	607424	EVO1_	snp	C	A	33	6	Clone variant, promoter	Putative transcription factor, as suggested by computational analysis; green fluorescent protein (GFP)-fusion protein localizes to both the cytoplasm and the nucleus and is induced in response to the DNA-damaging agent MMS; overproduction of a truncation allele suppresses lethality due to expression of the dominant PET9 allele AAC2-A128P
YPR022C	S000006226	S000006226	3402	16	607427	EVO1_	snp	T	A	29	7	Clone variant, promoter	Putative transcription factor, as suggested by computational analysis; green fluorescent protein (GFP)-fusion protein localizes to both the cytoplasm and the nucleus and is induced in response to the DNA-damaging agent MMS; overproduction of a truncation allele suppresses lethality due to expression of the dominant PET9 allele AAC2-A128P
YPR022C	S000006226	S000006226	3402	16	607429	EVO1_	snp	C	A	29	7	Clone variant, promoter	Putative transcription factor, as suggested by computational analysis; green fluorescent protein (GFP)-fusion protein localizes to both the cytoplasm and the nucleus and is induced in response to the DNA-damaging agent MMS; overproduction of a truncation allele suppresses lethality due to expression of the dominant PET9 allele AAC2-A128P
YPR022C	S000006226	S000006226	3402	16	607447	EVO3_	snp	T	A	33	6	Clone variant, promoter	Putative transcription factor, as suggested by computational analysis; green fluorescent protein (GFP)-fusion protein localizes to both the cytoplasm and the nucleus and is induced in response to the DNA-damaging agent MMS; overproduction of a truncation allele suppresses lethality due to expression of the dominant PET9 allele AAC2-A128P
YPR022C	S000006226	S000006226	3402	16	607462	EVO1_	snp	G	A	25	8	Clone variant, promoter	Putative transcription factor, as suggested by computational analysis; green fluorescent protein (GFP)-fusion protein localizes to both the cytoplasm and the nucleus and is induced in response to the DNA-damaging agent MMS; overproduction of a truncation allele suppresses lethality due to expression of the dominant PET9 allele AAC2-A128P
YPR022C	S000006226	S000006226	3402	16	607481	EVO1_	snp	C	A	25	8	Clone variant, promoter	Putative transcription factor, as suggested by computational analysis; green fluorescent protein (GFP)-fusion protein localizes to both the cytoplasm and the nucleus and is induced in response to the DNA-damaging agent MMS; overproduction of a truncation allele suppresses lethality due to expression of the dominant PET9 allele AAC2-A128P
YPR022C	S000006226	S000006226	3402	16	607393	EVO7_	snp	C	A	25	8	Clone variant, promoter	Putative transcription factor, as suggested by computational analysis; green fluorescent protein (GFP)-fusion protein localizes to both the cytoplasm and the nucleus and is induced in response to the DNA-damaging agent MMS; overproduction of a truncation allele suppresses lethality due to expression of the dominant PET9 allele AAC2-A128P
YPR022C	S000006226	S000006226	3402	16	607427	EVO5_	snp	T	A	20	10	Clone variant, promoter	Putative transcription factor, as suggested by computational analysis; green fluorescent protein (GFP)-fusion protein localizes to both the cytoplasm and the nucleus and is induced in response to the DNA-damaging agent MMS; overproduction of a truncation allele suppresses lethality due to expression of the dominant PET9 allele AAC2-A128P
YPR022C	S000006226	S000006226	3402	16	607455	EVO6_	snp	T	A	25	8	Clone variant, promoter	Putative transcription factor, as suggested by computational analysis; green fluorescent protein (GFP)-fusion protein localizes to both the cytoplasm and the nucleus and is induced in response to the DNA-damaging agent MMS; overproduction of a truncation allele suppresses lethality due to expression of the dominant PET9 allele AAC2-A128P
YPR022C	S000006226	S000006226	3402	16	607460	EVO6_	snp	C	A	25	8	Clone variant, promoter	Putative transcription factor, as suggested by computational analysis; green fluorescent protein (GFP)-fusion protein localizes to both the cytoplasm and the nucleus and is induced in response to the DNA-damaging agent MMS; overproduction of a truncation allele suppresses lethality due to expression of the dominant PET9 allele AAC2-A128P
YPR022C	S000006226	S000006226	3402	16	607462	EVO6_	snp	G	A	29	7	Clone variant, promoter	Putative transcription factor, as suggested by computational analysis; green fluorescent protein (GFP)-fusion protein localizes to both the cytoplasm and the nucleus and is induced in response to the DNA-damaging agent MMS; overproduction of a truncation allele suppresses lethality due to expression of the dominant PET9 allele AAC2-A128P
YLR182W	S000004172	SWI6	2412	12	517820	EVO4_	snp	C	A	20	10	Clone variant, promoter	Transcription cofactor; forms complexes with Swi4p and Mbp1p to regulate transcription at the G1/S transition; involved in meiotic gene expression; also binds Stb1p to regulate transcription at START; cell wall stress induces phosphorylation by Mpk1p, which regulates Swi6p localization; required for the unfolded protein response, independently of its known transcriptional coactivators
YLR182W	S000004172	SWI6	2412	12	517847	EVO3_	snp	C	A	33	9	Clone variant, promoter	Transcription cofactor; forms complexes with Swi4p and Mbp1p to regulate transcription at the G1/S transition; involved in meiotic gene expression; also binds Stb1p to regulate transcription at START; cell wall stress induces phosphorylation by Mpk1p, which regulates Swi6p localization; required for the unfolded protein response, independently of its known transcriptional coactivators
YLR182W	S000004172	SWI6	2412	12	518917	EVO6_	snp	T	G	26	69	Clone variant, nonsynonymous	Transcription cofactor; forms complexes with Swi4p and Mbp1p to regulate transcription at the G1/S transition; involved in meiotic gene expression; also binds Stb1p to regulate transcription at START; cell wall stress induces phosphorylation by Mpk1p, which regulates Swi6p localization; required for the unfolded protein response, independently of its known transcriptional coactivators
YLR182W	S000004172	SWI6	2412	12	517793	EVO5_	indel	G	+T	25	8	Clone variant, promoter	Transcription cofactor; forms complexes with Swi4p and Mbp1p to regulate transcription at the G1/S transition; involved in meiotic gene expression; also binds Stb1p to regulate transcription at START; cell wall stress induces phosphorylation by Mpk1p, which regulates Swi6p localization; required for the unfolded protein response, independently of its known transcriptional coactivators
YLR182W	S000004172	SWI6	2412	12	517826	EVO5_	snp	C	A	25	8	Clone variant, promoter	Transcription cofactor; forms complexes with Swi4p and Mbp1p to regulate transcription at the G1/S transition; involved in meiotic gene expression; also binds Stb1p to regulate transcription at START; cell wall stress induces phosphorylation by Mpk1p, which regulates Swi6p localization; required for the unfolded protein response, independently of its known transcriptional coactivators
YKR099W	S000001807	BAS1	2436	11	635447	EVO2_	indel	A	-T	29	7	Clone variant, promoter	Myb-related transcription factor; involved in regulating basal and induced expression of genes of the purine and histidine biosynthesis pathways; also involved in regulation of meiotic recombination at specific genes
YKR099W	S000001807	BAS1	2436	11	638436	EVO2_	indel	T	-C	25	40	Clone variant, other	Myb-related transcription factor; involved in regulating basal and induced expression of genes of the purine and histidine biosynthesis pathways; also involved in regulation of meiotic recombination at specific genes
YKR099W	S000001807	BAS1	2436	11	635612	EVO5_	snp	G	T	21	14	Clone variant, promoter	Myb-related transcription factor; involved in regulating basal and induced expression of genes of the purine and histidine biosynthesis pathways; also involved in regulation of meiotic recombination at specific genes
YKR099W	S000001807	BAS1	2436	11	635623	EVO5_	snp	G	T	21	14	Clone variant, promoter	Myb-related transcription factor; involved in regulating basal and induced expression of genes of the purine and histidine biosynthesis pathways; also involved in regulation of meiotic recombination at specific genes
YKR099W	S000001807	BAS1	2436	11	638436	EVO8_	indel	T	-C	25	56	Clone variant, other	Myb-related transcription factor; involved in regulating basal and induced expression of genes of the purine and histidine biosynthesis pathways; also involved in regulation of meiotic recombination at specific genes
YDR540C	S000002948	IRC4	540	4	1517679	EVO4_	indel	G	-T	88	8	Clone variant, promoter	Protein of unknown function; null mutant displays increased levels of spontaneous Rad52p foci; green fluorescent protein (GFP)-fusion protein localizes to the cytoplasm and nucleus
YDR540C	S000002948	IRC4	540	4	1517694	EVO1_	snp	A	T	20	10	Clone variant, promoter	Protein of unknown function; null mutant displays increased levels of spontaneous Rad52p foci; green fluorescent protein (GFP)-fusion protein localizes to the cytoplasm and nucleus
YOR051C	S000005577	ETT1	1239	15	426554	EVO1_	snp	T	A	24	21	Clone variant, promoter	Nuclear protein that inhibits replication of Brome mosaic virus; S. cerevisiae is a model system for studying replication of positive-strand RNA viruses in their natural hosts; deletion increases stop codon readthrough
YOR051C	S000005577	ETT1	1239	15	426575	EVO3_	snp	C	A	20	10	Clone variant, promoter	Nuclear protein that inhibits replication of Brome mosaic virus; S. cerevisiae is a model system for studying replication of positive-strand RNA viruses in their natural hosts; deletion increases stop codon readthrough
YOR051C	S000005577	ETT1	1239	15	426620	EVO5_	snp	G	T	26	19	Clone variant, promoter	Nuclear protein that inhibits replication of Brome mosaic virus; S. cerevisiae is a model system for studying replication of positive-strand RNA viruses in their natural hosts; deletion increases stop codon readthrough
YOR051C	S000005577	ETT1	1239	15	426622	EVO7_	snp	A	T	23	13	Clone variant, promoter	Nuclear protein that inhibits replication of Brome mosaic virus; S. cerevisiae is a model system for studying replication of positive-strand RNA viruses in their natural hosts; deletion increases stop codon readthrough
YOR051C	S000005577	ETT1	1239	15	426624	EVO6_	snp	A	T	22	18	Clone variant, promoter	Nuclear protein that inhibits replication of Brome mosaic virus; S. cerevisiae is a model system for studying replication of positive-strand RNA viruses in their natural hosts; deletion increases stop codon readthrough
YIR039C	S000001478	YPS6	1614	9	432260	EVO1_	snp	A	G	20	55	Clone variant, promoter	Putative GPI-anchored aspartic protease; member of the yapsin family of proteases involved in cell wall growth and maintenance
YPL012W	S000005933	RRP12	3687	16	528979	EVO2_	snp	C	T	20	25	Clone variant, promoter	Protein required for export of the ribosomal subunits; associates with the RNA components of the pre-ribosomes; has a role in nuclear import in association with Pse1p; also plays a role in the cell cycle and the DNA damage response; contains HEAT-repeats
YPL012W	S000005933	RRP12	3687	16	529000	EVO3_	snp	A	C	25	24	Clone variant, promoter	Protein required for export of the ribosomal subunits; associates with the RNA components of the pre-ribosomes; has a role in nuclear import in association with Pse1p; also plays a role in the cell cycle and the DNA damage response; contains HEAT-repeats
Q0120	S000007273	BI4	5712	17	36316	EVO2_	snp	C	A	57	7	Clone variant, promoter	Mitochondrial mRNA maturase; forms a complex with Nam2p to mediate splicing of the bI4 intron of the COB gene; encoded by both exon and intron sequences of partially processed COB mRNA
Q0110	S000007271	BI2	2040	17	36316	EVO2_	snp	C	A	57	7	Clone variant, promoter	Mitochondrial mRNA maturase with a role in splicing; encoded by both exon and intron sequences of partially processed COB mRNA
YJL095W	S000003631	BCK1	4437	10	247163	EVO1_	indel	C	-A	20	15	Clone variant, promoter	MAPKKK acting in the protein kinase C signaling pathway; the kinase C signaling pathway controls cell integrity; upon activation by Pkc1p phosphorylates downstream kinases Mkk1p and Mkk2p; MAPKKK is an acronym for mitogen-activated protein (MAP) kinase kinase kinase
YLR336C	S000004328	SGD1	2700	12	802484	EVO2_	indel	A	-T	25	8	Clone variant, promoter	Essential nuclear protein; required for biogenesis of the small ribosomal subunit; has a possible role in the osmoregulatory glycerol response; putative homolog of human NOM1 which is implicated in acute myeloid leukemia
YLR336C	S000004328	SGD1	2700	12	802484	EVO5_	indel	A	-T	27	15	Clone variant, promoter	Essential nuclear protein; required for biogenesis of the small ribosomal subunit; has a possible role in the osmoregulatory glycerol response; putative homolog of human NOM1 which is implicated in acute myeloid leukemia
YLR139C	S000004129	SLS1	1932	12	423578	EVO3_	snp	G	A	25	16	Clone variant, promoter	Mitochondrial membrane protein; coordinates expression of mitochondrially-encoded genes; may facilitate delivery of mRNA to membrane-bound translation machinery
YLR139C	S000004129	SLS1	1932	12	421495	EVO1_	indel	A	-G	44	16	Clone variant, other	Mitochondrial membrane protein; coordinates expression of mitochondrially-encoded genes; may facilitate delivery of mRNA to membrane-bound translation machinery
YLR139C	S000004129	SLS1	1932	12	421495	EVO3_	indel	A	-G	36	25	Clone variant, other	Mitochondrial membrane protein; coordinates expression of mitochondrially-encoded genes; may facilitate delivery of mRNA to membrane-bound translation machinery
YKR100C	S000001808	SKG1	1068	11	640539	EVO3_	snp	A	T	22	46	Clone variant, promoter	Transmembrane protein with a role in cell wall polymer composition; localizes on inner surface of plasma membrane at bud and in daughter cell; SKG1 has a paralog, AIM20, that arose from the whole genome duplication
YBR084C-A	S000002156	RPL19A	1076	2	415791	EVO4_	snp	G	T	22	9	Clone variant, promoter	Ribosomal 60S subunit protein L19A; rpl19a and rpl19b single null mutations result in slow growth, while the double null mutation is lethal; homologous to mammalian ribosomal protein L19, no bacterial homolog; RPL19A has a paralog, RPL19B, that arose from the whole genome duplication
YKL108W	S000001591	SLD2	1362	11	234031	EVO3_	indel	C	-A	29	7	Clone variant, promoter	Single-stranded DNA origin-binding and annealing protein; required for initiation of DNA replication; phosphorylated in S phase by cyclin-dependent kinases (Cdks), promoting origin binding, DNA replication and Dpb11p complex formation; component of the preloading complex; binds the Mcm2-7p complex to prevent inappropriate Mcm2-7p interaction with the GINS complex in G1; required for S phase check…
YKL108W	S000001591	SLD2	1362	11	234189	EVO6_	snp	T	C	29	7	Clone variant, promoter	Single-stranded DNA origin-binding and annealing protein; required for initiation of DNA replication; phosphorylated in S phase by cyclin-dependent kinases (Cdks), promoting origin binding, DNA replication and Dpb11p complex formation; component of the preloading complex; binds the Mcm2-7p complex to prevent inappropriate Mcm2-7p interaction with the GINS complex in G1; required for S phase check…
YHL011C	S000001003	PRS3	963	8	81880	EVO2_	snp	G	A	29	14	Clone variant, promoter	5-phospho-ribosyl-1(alpha)-pyrophosphate synthetase; synthesizes PRPP, which is required for nucleotide, histidine, and tryptophan biosynthesis; one of five related enzymes, which are active as heteromultimeric complexes
YHL011C	S000001003	PRS3	963	8	81880	EVO1_	snp	G	A	25	16	Clone variant, promoter	5-phospho-ribosyl-1(alpha)-pyrophosphate synthetase; synthesizes PRPP, which is required for nucleotide, histidine, and tryptophan biosynthesis; one of five related enzymes, which are active as heteromultimeric complexes
YHL011C	S000001003	PRS3	963	8	81880	EVO3_	snp	G	A	21	14	Clone variant, promoter	5-phospho-ribosyl-1(alpha)-pyrophosphate synthetase; synthesizes PRPP, which is required for nucleotide, histidine, and tryptophan biosynthesis; one of five related enzymes, which are active as heteromultimeric complexes
YBR105C	S000000309	VID24	1089	2	452434	EVO3_	indel	C	-T	25	12	Clone variant, promoter	GID Complex regulatory subunit; binds GID Complex in response to glucose through interactions with complex member Vid28p; regulates fructose-1,6-bisphosphatase (FBPase) targeting to the vacuole; promotes proteasome-dependent catabolite degradation of FBPase; peripheral membrane protein located at Vid (vacuole import and degradation) vesicles
YOR127W	S000005653	RGA1	3024	15	560808	EVO2_	indel	G	+A	47	15	Clone variant, promoter	GTPase-activating protein for polarity-establishment protein Cdc42p; implicated in control of septin organization, pheromone response, and haploid invasive growth; relocalizes from bud neck to cytoplasm upon DNA replication stress; RGA1 has a paralog, RGA2, that arose from the whole genome duplication
YGR089W	S000003321	NNF2	2811	7	656456	EVO4_	snp	T	G	26	31	Clone variant, promoter	Protein that exhibits physical and genetic interactions with Rpb8p; Rpb8p is a subunit of RNA polymerases I, II, and III; computational analysis of large-scale protein-protein interaction data suggests a role in chromosome segregation
YPL050C	S000005971	MNN9	1188	16	462196	EVO3_	snp	C	A	23	13	Clone variant, promoter	Subunit of Golgi mannosyltransferase complex; this complex mediates elongation of the polysaccharide mannan backbone; forms a separate complex with Van1p that is also involved in backbone elongation; this complex also contains Anp1p, Mnn10p, Mnn11p, and Hoc1p
YPL050C	S000005971	MNN9	1188	16	462203	EVO3_	snp	C	A	27	11	Clone variant, promoter	Subunit of Golgi mannosyltransferase complex; this complex mediates elongation of the polysaccharide mannan backbone; forms a separate complex with Van1p that is also involved in backbone elongation; this complex also contains Anp1p, Mnn10p, Mnn11p, and Hoc1p
YPL050C	S000005971	MNN9	1188	16	462188	EVO8_	snp	C	A	22	9	Clone variant, promoter	Subunit of Golgi mannosyltransferase complex; this complex mediates elongation of the polysaccharide mannan backbone; forms a separate complex with Van1p that is also involved in backbone elongation; this complex also contains Anp1p, Mnn10p, Mnn11p, and Hoc1p
YPL050C	S000005971	MNN9	1188	16	462213	EVO6_	snp	C	A	22	9	Clone variant, promoter	Subunit of Golgi mannosyltransferase complex; this complex mediates elongation of the polysaccharide mannan backbone; forms a separate complex with Van1p that is also involved in backbone elongation; this complex also contains Anp1p, Mnn10p, Mnn11p, and Hoc1p
YGR177C	S000003409	ATF2	1608	7	850799	EVO2_	indel	G	+A	20	10	Clone variant, promoter	Alcohol acetyltransferase; may play a role in steroid detoxification; forms volatile esters during fermentation, which is important for brewing and winemaking
YGR177C	S000003409	ATF2	1608	7	850850	EVO2_	snp	C	T	23	13	Clone variant, promoter	Alcohol acetyltransferase; may play a role in steroid detoxification; forms volatile esters during fermentation, which is important for brewing and winemaking
YGR177C	S000003409	ATF2	1608	7	850842	EVO7_	snp	C	T	31	16	Clone variant, promoter	Alcohol acetyltransferase; may play a role in steroid detoxification; forms volatile esters during fermentation, which is important for brewing and winemaking
YNL141W	S000005085	AAH1	1044	14	359387	EVO4_	snp	G	T	75	4	Clone variant, promoter	Adenine deaminase (adenine aminohydrolase); converts adenine to hypoxanthine; involved in purine salvage; transcriptionally regulated by nutrient levels and growth phase; Aah1p degraded upon entry into quiescence via SCF and the proteasome
YNL141W	S000005085	AAH1	1044	14	359387	EVO3_	snp	G	T	100	3	Clone variant, promoter	Adenine deaminase (adenine aminohydrolase); converts adenine to hypoxanthine; involved in purine salvage; transcriptionally regulated by nutrient levels and growth phase; Aah1p degraded upon entry into quiescence via SCF and the proteasome
YPR025C	S000006229	CCL1	1182	16	615255	EVO4_	snp	G	A	31	13	Clone variant, promoter	Cyclin associated with protein kinase Kin28p; Kin28p is the TFIIH-associated carboxy-terminal domain (CTD) kinase involved in transcription initiation at RNA polymerase II promoters; human homolog CCNH allows growth of yeast ccl1 temperature-sensitive mutant at restrictive temperature
YHR066W	S000001108	SSF1	1362	8	229190	EVO1_	snp	T	G	22	18	Clone variant, promoter	Constituent of 66S pre-ribosomal particles; required for ribosomal large subunit maturation; functionally redundant with Ssf2p; member of the Brix family; SSF1 has a paralog, SSF2, that arose from the whole genome duplication
YHR066W	S000001108	SSF1	1362	8	229165	EVO5_	snp	T	G	31	13	Clone variant, promoter	Constituent of 66S pre-ribosomal particles; required for ribosomal large subunit maturation; functionally redundant with Ssf2p; member of the Brix family; SSF1 has a paralog, SSF2, that arose from the whole genome duplication
YOR230W	S000005756	WTM1	1314	15	770647	EVO1_	snp	C	T	25	8	Clone variant, promoter	Transcriptional modulator; involved in regulation of meiosis, silencing, and expression of RNR genes; required for nuclear localization of the ribonucleotide reductase small subunit Rnr2p and Rnr4p; contains WD repeats
YOR230W	S000005756	WTM1	1314	15	770649	EVO1_	snp	G	T	25	8	Clone variant, promoter	Transcriptional modulator; involved in regulation of meiosis, silencing, and expression of RNR genes; required for nuclear localization of the ribonucleotide reductase small subunit Rnr2p and Rnr4p; contains WD repeats
YOR230W	S000005756	WTM1	1314	15	770649	EVO6_	snp	G	T	20	15	Clone variant, promoter	Transcriptional modulator; involved in regulation of meiosis, silencing, and expression of RNR genes; required for nuclear localization of the ribonucleotide reductase small subunit Rnr2p and Rnr4p; contains WD repeats
YOR230W	S000005756	WTM1	1314	15	770652	EVO6_	snp	G	T	27	15	Clone variant, promoter	Transcriptional modulator; involved in regulation of meiosis, silencing, and expression of RNR genes; required for nuclear localization of the ribonucleotide reductase small subunit Rnr2p and Rnr4p; contains WD repeats
YOR230W	S000005756	WTM1	1314	15	770670	EVO7_	snp	G	T	20	10	Clone variant, promoter	Transcriptional modulator; involved in regulation of meiosis, silencing, and expression of RNR genes; required for nuclear localization of the ribonucleotide reductase small subunit Rnr2p and Rnr4p; contains WD repeats
YMR146C	S000004754	TIF34	1044	13	559061	EVO3_	snp	G	A	20	15	Clone variant, promoter	eIF3i subunit of the eukaryotic translation initiation factor 3 (eIF3); subunit of the core complex of eIF3; essential for translation; stimulates rate of ribosomal scanning during translation reinitiation; eIF3 is also involved in programmed stop codon readthrough
YDL079C	S000002237	MRK1	1798	4	315071	EVO1_	indel	C	-T	31	13	Clone variant, promoter	Glycogen synthase kinase 3 (GSK-3) homolog; one of four GSK-3 homologs in S. cerevisiae that function to activate Msn2p-dependent transcription of stress responsive genes and that function in protein degradation; MRK1 has a paralog, RIM11, that arose from the whole genome duplication
YDR383C	S000002791	NKP1	717	4	1240956	EVO3_	snp	C	A	67	3	Clone variant, promoter	Central kinetochore protein and subunit of the Ctf19 complex; mutants have elevated rates of chromosome loss; orthologous to fission yeast kinetochore protein fta4
YDR383C	S000002791	NKP1	717	4	1240958	EVO1_	indel	G	+A	29	7	Clone variant, promoter	Central kinetochore protein and subunit of the Ctf19 complex; mutants have elevated rates of chromosome loss; orthologous to fission yeast kinetochore protein fta4
YDR383C	S000002791	NKP1	717	4	1240958	EVO3_	snp	G	A	40	5	Clone variant, promoter	Central kinetochore protein and subunit of the Ctf19 complex; mutants have elevated rates of chromosome loss; orthologous to fission yeast kinetochore protein fta4
YDR383C	S000002791	NKP1	717	4	1241110	EVO2_	indel	G	-A	20	10	Clone variant, promoter	Central kinetochore protein and subunit of the Ctf19 complex; mutants have elevated rates of chromosome loss; orthologous to fission yeast kinetochore protein fta4
YDR383C	S000002791	NKP1	717	4	1241123	EVO4_	snp	G	T	25	8	Clone variant, promoter	Central kinetochore protein and subunit of the Ctf19 complex; mutants have elevated rates of chromosome loss; orthologous to fission yeast kinetochore protein fta4
YDR383C	S000002791	NKP1	717	4	1241131	EVO4_	snp	C	T	21	14	Clone variant, promoter	Central kinetochore protein and subunit of the Ctf19 complex; mutants have elevated rates of chromosome loss; orthologous to fission yeast kinetochore protein fta4
YDR383C	S000002791	NKP1	717	4	1241136	EVO4_	snp	C	T	23	13	Clone variant, promoter	Central kinetochore protein and subunit of the Ctf19 complex; mutants have elevated rates of chromosome loss; orthologous to fission yeast kinetochore protein fta4
YDR383C	S000002791	NKP1	717	4	1241123	EVO8_	snp	G	T	40	5	Clone variant, promoter	Central kinetochore protein and subunit of the Ctf19 complex; mutants have elevated rates of chromosome loss; orthologous to fission yeast kinetochore protein fta4
YDR383C	S000002791	NKP1	717	4	1241137	EVO7_	snp	G	T	20	10	Clone variant, promoter	Central kinetochore protein and subunit of the Ctf19 complex; mutants have elevated rates of chromosome loss; orthologous to fission yeast kinetochore protein fta4
YDR383C	S000002791	NKP1	717	4	1241142	EVO7_	snp	G	T	20	10	Clone variant, promoter	Central kinetochore protein and subunit of the Ctf19 complex; mutants have elevated rates of chromosome loss; orthologous to fission yeast kinetochore protein fta4
YKL166C	S000001649	TPK3	1197	11	136102	EVO1_	indel	C	-ATAT	20	10	Clone variant, promoter	cAMP-dependent protein kinase catalytic subunit; promotes vegetative growth in response to nutrients via the Ras-cAMP signaling pathway; partially redundant with Tpk1p and Tpk2p; localizes to P-bodies during stationary phase; TPK3 has a paralog, TPK1, that arose from the whole genome duplication
YDR037W	S000002444	KRS1	1776	4	525363	EVO4_	snp	G	T	28	18	Clone variant, promoter	Lysyl-tRNA synthetase
YDR037W	S000002444	KRS1	1776	4	525283	EVO8_	snp	G	T	27	15	Clone variant, promoter	Lysyl-tRNA synthetase
YPL135W	S000006056	ISU1	498	16	296859	EVO1_	snp	C	T	22	9	Clone variant, promoter	Conserved protein of the mitochondrial matrix; performs a scaffolding function during assembly of iron-sulfur clusters, interacts physically and functionally with yeast frataxin (Yfh1p); ISU1 has a paralog, ISU2, that arose from the whole genome duplication; isu1 isu2 double mutant is inviable; human homolog ISCU implicated in mitochondrial myopathy, can complement isu1 isu2 double mutant
YDR073W	S000002480	SNF11	510	4	591770	EVO2_	snp	G	A	20	10	Clone variant, promoter	Subunit of the SWI/SNF chromatin remodeling complex; involved in transcriptional regulation; interacts with a highly conserved 40-residue sequence of Snf2p; relocates to the cytosol under hypoxic conditions
YLR144C	S000004134	ACF2	2340	12	432142	EVO2_	snp	C	A	43	7	Clone variant, promoter	Intracellular beta-1,3-endoglucanase; expression is induced during sporulation; may have a role in cortical actin cytoskeleton assembly; protein abundance increases in response to DNA replication stress
YLR144C	S000004134	ACF2	2340	12	432142	EVO4_	indel	C	+A	29	17	Clone variant, promoter	Intracellular beta-1,3-endoglucanase; expression is induced during sporulation; may have a role in cortical actin cytoskeleton assembly; protein abundance increases in response to DNA replication stress
YLR144C	S000004134	ACF2	2340	12	432142	EVO1_	indel	C	+A	23	13	Clone variant, promoter	Intracellular beta-1,3-endoglucanase; expression is induced during sporulation; may have a role in cortical actin cytoskeleton assembly; protein abundance increases in response to DNA replication stress
YLR144C	S000004134	ACF2	2340	12	432142	EVO5_	indel	C	+A	21	19	Clone variant, promoter	Intracellular beta-1,3-endoglucanase; expression is induced during sporulation; may have a role in cortical actin cytoskeleton assembly; protein abundance increases in response to DNA replication stress
YLR144C	S000004134	ACF2	2340	12	432142	EVO6_	indel	C	-A	29	17	Clone variant, promoter	Intracellular beta-1,3-endoglucanase; expression is induced during sporulation; may have a role in cortical actin cytoskeleton assembly; protein abundance increases in response to DNA replication stress
YLR144C	S000004134	ACF2	2340	12	432142	EVO8_	indel	C	+A	29	17	Clone variant, promoter	Intracellular beta-1,3-endoglucanase; expression is induced during sporulation; may have a role in cortical actin cytoskeleton assembly; protein abundance increases in response to DNA replication stress
YIL052C	S000001314	RPL34B	838	9	257453	EVO1_	snp	C	A	23	13	Clone variant, promoter	Ribosomal 60S subunit protein L34B; homologous to mammalian ribosomal protein L34, no bacterial homolog; RPL34B has a paralog, RPL34A, that arose from the whole genome duplication
YIL052C	S000001314	RPL34B	838	9	257457	EVO8_	snp	T	A	38	8	Clone variant, promoter	Ribosomal 60S subunit protein L34B; homologous to mammalian ribosomal protein L34, no bacterial homolog; RPL34B has a paralog, RPL34A, that arose from the whole genome duplication
YIL052C	S000001314	RPL34B	838	9	257462	EVO8_	snp	G	A	25	8	Clone variant, promoter	Ribosomal 60S subunit protein L34B; homologous to mammalian ribosomal protein L34, no bacterial homolog; RPL34B has a paralog, RPL34A, that arose from the whole genome duplication
YDR036C	S000002443	EHD3	1503	4	525363	EVO4_	snp	G	T	28	18	Clone variant, promoter	3-hydroxyisobutyryl-CoA hydrolase; member of a family of enoyl-CoA hydratase/isomerases; non-tagged protein is detected in highly purified mitochondria in high-throughput studies; phosphorylated; mutation affects fluid-phase endocytosis
YDR036C	S000002443	EHD3	1503	4	523020	EVO2_	snp	C	T	25	8	Clone variant, other	3-hydroxyisobutyryl-CoA hydrolase; member of a family of enoyl-CoA hydratase/isomerases; non-tagged protein is detected in highly purified mitochondria in high-throughput studies; phosphorylated; mutation affects fluid-phase endocytosis
YDR036C	S000002443	EHD3	1503	4	523024	EVO4_	indel	C	-T	29	7	Clone variant, other	3-hydroxyisobutyryl-CoA hydrolase; member of a family of enoyl-CoA hydratase/isomerases; non-tagged protein is detected in highly purified mitochondria in high-throughput studies; phosphorylated; mutation affects fluid-phase endocytosis
YDR036C	S000002443	EHD3	1503	4	525283	EVO8_	snp	G	T	27	15	Clone variant, promoter	3-hydroxyisobutyryl-CoA hydrolase; member of a family of enoyl-CoA hydratase/isomerases; non-tagged protein is detected in highly purified mitochondria in high-throughput studies; phosphorylated; mutation affects fluid-phase endocytosis
YDR036C	S000002443	EHD3	1503	4	523024	EVO5_	indel	C	-T	50	6	Clone variant, other	3-hydroxyisobutyryl-CoA hydrolase; member of a family of enoyl-CoA hydratase/isomerases; non-tagged protein is detected in highly purified mitochondria in high-throughput studies; phosphorylated; mutation affects fluid-phase endocytosis
YGR086C	S000003318	PIL1	1020	7	650954	EVO2_	snp	T	A	29	7	Clone variant, promoter	Eisosome core component; eisosomes are large immobile cell cortex structures associated with endocytosis; detected in phosphorylated state in mitochondria; phosphorylated on Thr233 upon Pkc1p hyperactivation in a Slt2p MAPK-dependent fashion; null mutant shows activation of Pkc1p/Ypk1p stress resistance pathways; member of BAR domain family; protein increases in abundance and relocalizes from pla…
YGR086C	S000003318	PIL1	1020	7	650954	EVO4_	snp	T	A	22	9	Clone variant, promoter	Eisosome core component; eisosomes are large immobile cell cortex structures associated with endocytosis; detected in phosphorylated state in mitochondria; phosphorylated on Thr233 upon Pkc1p hyperactivation in a Slt2p MAPK-dependent fashion; null mutant shows activation of Pkc1p/Ypk1p stress resistance pathways; member of BAR domain family; protein increases in abundance and relocalizes from pla…
YGR086C	S000003318	PIL1	1020	7	650954	EVO1_	snp	T	A	40	5	Clone variant, promoter	Eisosome core component; eisosomes are large immobile cell cortex structures associated with endocytosis; detected in phosphorylated state in mitochondria; phosphorylated on Thr233 upon Pkc1p hyperactivation in a Slt2p MAPK-dependent fashion; null mutant shows activation of Pkc1p/Ypk1p stress resistance pathways; member of BAR domain family; protein increases in abundance and relocalizes from pla…
YGR086C	S000003318	PIL1	1020	7	649575	EVO2_	snp	A	T	20	10	Clone variant, other	Eisosome core component; eisosomes are large immobile cell cortex structures associated with endocytosis; detected in phosphorylated state in mitochondria; phosphorylated on Thr233 upon Pkc1p hyperactivation in a Slt2p MAPK-dependent fashion; null mutant shows activation of Pkc1p/Ypk1p stress resistance pathways; member of BAR domain family; protein increases in abundance and relocalizes from pla…
YGR086C	S000003318	PIL1	1020	7	649582	EVO2_	snp	G	T	20	10	Clone variant, other	Eisosome core component; eisosomes are large immobile cell cortex structures associated with endocytosis; detected in phosphorylated state in mitochondria; phosphorylated on Thr233 upon Pkc1p hyperactivation in a Slt2p MAPK-dependent fashion; null mutant shows activation of Pkc1p/Ypk1p stress resistance pathways; member of BAR domain family; protein increases in abundance and relocalizes from pla…
YGR086C	S000003318	PIL1	1020	7	649541	EVO8_	snp	T	A	33	6	Clone variant, other	Eisosome core component; eisosomes are large immobile cell cortex structures associated with endocytosis; detected in phosphorylated state in mitochondria; phosphorylated on Thr233 upon Pkc1p hyperactivation in a Slt2p MAPK-dependent fashion; null mutant shows activation of Pkc1p/Ypk1p stress resistance pathways; member of BAR domain family; protein increases in abundance and relocalizes from pla…
YGR086C	S000003318	PIL1	1020	7	649596	EVO5_	snp	A	T	25	8	Clone variant, other	Eisosome core component; eisosomes are large immobile cell cortex structures associated with endocytosis; detected in phosphorylated state in mitochondria; phosphorylated on Thr233 upon Pkc1p hyperactivation in a Slt2p MAPK-dependent fashion; null mutant shows activation of Pkc1p/Ypk1p stress resistance pathways; member of BAR domain family; protein increases in abundance and relocalizes from pla…
YDL047W	S000002205	SIT4	936	4	369170	EVO1_	indel	G	-A	25	8	Clone variant, promoter	Ceramide-activated, type 2A-related serine-threonine phosphatase; functions in G1/S transition of mitotic cycle; controls lifespan, mitochondrial function, cell cycle progression by regulating HXK2 phosphorylation; regulator of COPII coat dephosphorylation; required for ER to Golgi traffic; interacts with Hrr25p kinase; cytoplasmic and nuclear protein that modulates functions mediated by Pkc1p in…
YDL047W	S000002205	SIT4	936	4	369150	EVO6_	snp	C	A	22	9	Clone variant, promoter	Ceramide-activated, type 2A-related serine-threonine phosphatase; functions in G1/S transition of mitotic cycle; controls lifespan, mitochondrial function, cell cycle progression by regulating HXK2 phosphorylation; regulator of COPII coat dephosphorylation; required for ER to Golgi traffic; interacts with Hrr25p kinase; cytoplasmic and nuclear protein that modulates functions mediated by Pkc1p in…
YBR265W	S000000469	TSC10	963	2	738468	EVO3_	indel	C	+A	25	20	Clone variant, promoter	3-ketosphinganine reductase; catalyzes the second step in phytosphingosine synthesis; essential for growth in the absence of exogenous dihydrosphingosine or phytosphingosine; localized to lipid droplets; member of short chain dehydrogenase/reductase protein family
YOL059W	S000005420	GPD2	1323	15	216986	EVO4_	snp	G	T	27	11	Clone variant, promoter	NAD-dependent glycerol 3-phosphate dehydrogenase; expression is controlled by an oxygen-independent signaling pathway required to regulate metabolism under anoxic conditions; located in cytosol and mitochondria; constitutively active but is inactivated via phosphorylation by energy-stress responsive kinase SNF1; GPD2 has a paralog, GPD1, that arose from the whole genome duplication
YOL059W	S000005420	GPD2	1323	15	216997	EVO4_	snp	G	T	50	10	Clone variant, promoter	NAD-dependent glycerol 3-phosphate dehydrogenase; expression is controlled by an oxygen-independent signaling pathway required to regulate metabolism under anoxic conditions; located in cytosol and mitochondria; constitutively active but is inactivated via phosphorylation by energy-stress responsive kinase SNF1; GPD2 has a paralog, GPD1, that arose from the whole genome duplication
YCR065W	S000000661	HCM1	1695	3	228960	EVO2_	snp	T	A	29	7	Clone variant, promoter	Forkhead transcription factor; drives S-phase activation of genes involved in chromosome segregation, spindle dynamics, budding; also activates genes involved in respiration, use of alternative energy sources (like proline), NAD synthesis, oxidative stress resistance; key factor in early adaptation to nutrient deficiency and diauxic shift; suppressor of calmodulin mutants with specific SPB assemb…
YCR065W	S000000661	HCM1	1695	3	231025	EVO2_	snp	A	T	22	9	Clone variant, other	Forkhead transcription factor; drives S-phase activation of genes involved in chromosome segregation, spindle dynamics, budding; also activates genes involved in respiration, use of alternative energy sources (like proline), NAD synthesis, oxidative stress resistance; key factor in early adaptation to nutrient deficiency and diauxic shift; suppressor of calmodulin mutants with specific SPB assemb…
YCR065W	S000000661	HCM1	1695	3	231030	EVO2_	snp	C	T	20	15	Clone variant, other	Forkhead transcription factor; drives S-phase activation of genes involved in chromosome segregation, spindle dynamics, budding; also activates genes involved in respiration, use of alternative energy sources (like proline), NAD synthesis, oxidative stress resistance; key factor in early adaptation to nutrient deficiency and diauxic shift; suppressor of calmodulin mutants with specific SPB assemb…
YCR065W	S000000661	HCM1	1695	3	231053	EVO1_	snp	A	C	27	15	Clone variant, other	Forkhead transcription factor; drives S-phase activation of genes involved in chromosome segregation, spindle dynamics, budding; also activates genes involved in respiration, use of alternative energy sources (like proline), NAD synthesis, oxidative stress resistance; key factor in early adaptation to nutrient deficiency and diauxic shift; suppressor of calmodulin mutants with specific SPB assemb…
YCR065W	S000000661	HCM1	1695	3	228963	EVO7_	indel	G	+T	21	14	Clone variant, promoter	Forkhead transcription factor; drives S-phase activation of genes involved in chromosome segregation, spindle dynamics, budding; also activates genes involved in respiration, use of alternative energy sources (like proline), NAD synthesis, oxidative stress resistance; key factor in early adaptation to nutrient deficiency and diauxic shift; suppressor of calmodulin mutants with specific SPB assemb…
YCR065W	S000000661	HCM1	1695	3	231025	EVO6_	snp	A	C	22	9	Clone variant, other	Forkhead transcription factor; drives S-phase activation of genes involved in chromosome segregation, spindle dynamics, budding; also activates genes involved in respiration, use of alternative energy sources (like proline), NAD synthesis, oxidative stress resistance; key factor in early adaptation to nutrient deficiency and diauxic shift; suppressor of calmodulin mutants with specific SPB assemb…
YCR065W	S000000661	HCM1	1695	3	231045	EVO6_	snp	A	C	30	10	Clone variant, other	Forkhead transcription factor; drives S-phase activation of genes involved in chromosome segregation, spindle dynamics, budding; also activates genes involved in respiration, use of alternative energy sources (like proline), NAD synthesis, oxidative stress resistance; key factor in early adaptation to nutrient deficiency and diauxic shift; suppressor of calmodulin mutants with specific SPB assemb…
YLR254C	S000004244	NDL1	570	12	645224	EVO4_	snp	C	T	20	15	Clone variant, promoter	Homolog of nuclear distribution factor NudE; NUDEL; interacts with Pac1p and regulates dynein targeting to microtubule plus ends
YLR254C	S000004244	NDL1	570	12	645208	EVO6_	snp	C	A	22	9	Clone variant, promoter	Homolog of nuclear distribution factor NudE; NUDEL; interacts with Pac1p and regulates dynein targeting to microtubule plus ends
YPL211W	S000006132	NIP7	546	16	153244	EVO4_	snp	G	T	25	8	Clone variant, promoter	Nucleolar protein required for 60S ribosome subunit biogenesis; constituent of 66S pre-ribosomal particles; physically interacts with Nop8p and the exosome subunit Rrp43p
YPL211W	S000006132	NIP7	546	16	153266	EVO4_	snp	C	A	33	6	Clone variant, promoter	Nucleolar protein required for 60S ribosome subunit biogenesis; constituent of 66S pre-ribosomal particles; physically interacts with Nop8p and the exosome subunit Rrp43p
YPL211W	S000006132	NIP7	546	16	153269	EVO4_	snp	A	T	20	10	Clone variant, promoter	Nucleolar protein required for 60S ribosome subunit biogenesis; constituent of 66S pre-ribosomal particles; physically interacts with Nop8p and the exosome subunit Rrp43p
YKR105C	S000001813	VBA5	1749	11	660595	EVO1_	snp	C	T	20	15	Clone variant, promoter	Plasma membrane protein of the Major Facilitator Superfamily (MFS); involved in amino acid uptake and drug sensitivity; VBA5 has a paralog, VBA3, that arose from a segmental duplication
YLR181C	S000004171	VTA1	993	12	517820	EVO4_	snp	C	A	20	10	Clone variant, promoter	Multivesicular body (MVB) protein; involved in endosomal protein sorting; regulates Vps4p activity by promoting its oligomerization; has an N-terminal Vps60- and Did2- binding domain, a linker region, and a C-terminal Vps4p binding domain
YLR181C	S000004171	VTA1	993	12	517847	EVO3_	snp	C	A	33	9	Clone variant, promoter	Multivesicular body (MVB) protein; involved in endosomal protein sorting; regulates Vps4p activity by promoting its oligomerization; has an N-terminal Vps60- and Did2- binding domain, a linker region, and a C-terminal Vps4p binding domain
YLR181C	S000004171	VTA1	993	12	517793	EVO5_	indel	G	+T	25	8	Clone variant, promoter	Multivesicular body (MVB) protein; involved in endosomal protein sorting; regulates Vps4p activity by promoting its oligomerization; has an N-terminal Vps60- and Did2- binding domain, a linker region, and a C-terminal Vps4p binding domain
YLR181C	S000004171	VTA1	993	12	517826	EVO5_	snp	C	A	25	8	Clone variant, promoter	Multivesicular body (MVB) protein; involved in endosomal protein sorting; regulates Vps4p activity by promoting its oligomerization; has an N-terminal Vps60- and Did2- binding domain, a linker region, and a C-terminal Vps4p binding domain
YMR074C	S000004678	S000004678	438	13	413802	EVO2_	snp	T	G	33	61	Clone variant, promoter	Protein with homology to human PDCD5; PDCD5 is involved in programmed cell death; N-terminal region forms a conserved triple-helix bundle structure; overproduction suppresses lethality due to expression of the dominant PET9 allele AAC2-A128P; overexpression promotes H2O2-induced apoptosis; YMR074C is not an essential gene; protein abundance increases in response to DNA replication stress
YMR074C	S000004678	S000004678	438	13	413802	EVO4_	snp	T	G	22	69	Clone variant, promoter	Protein with homology to human PDCD5; PDCD5 is involved in programmed cell death; N-terminal region forms a conserved triple-helix bundle structure; overproduction suppresses lethality due to expression of the dominant PET9 allele AAC2-A128P; overexpression promotes H2O2-induced apoptosis; YMR074C is not an essential gene; protein abundance increases in response to DNA replication stress
YMR074C	S000004678	S000004678	438	13	413802	EVO1_	snp	T	G	23	75	Clone variant, promoter	Protein with homology to human PDCD5; PDCD5 is involved in programmed cell death; N-terminal region forms a conserved triple-helix bundle structure; overproduction suppresses lethality due to expression of the dominant PET9 allele AAC2-A128P; overexpression promotes H2O2-induced apoptosis; YMR074C is not an essential gene; protein abundance increases in response to DNA replication stress
YMR074C	S000004678	S000004678	438	13	413802	EVO3_	snp	T	G	30	71	Clone variant, promoter	Protein with homology to human PDCD5; PDCD5 is involved in programmed cell death; N-terminal region forms a conserved triple-helix bundle structure; overproduction suppresses lethality due to expression of the dominant PET9 allele AAC2-A128P; overexpression promotes H2O2-induced apoptosis; YMR074C is not an essential gene; protein abundance increases in response to DNA replication stress
YIL026C	S000001288	IRR1	3453	9	308509	EVO2_	snp	A	C	25	36	Clone variant, promoter	Subunit of the cohesin complex; which is required for sister chromatid cohesion during mitosis and meiosis and interacts with centromeres and chromosome arms; relocalizes to the cytosol in response to hypoxia; essential for viability
YPL131W	S000006052	RPL5	894	16	302891	EVO2_	indel	C	+T	60	5	Clone variant, promoter	Ribosomal 60S subunit protein L5; nascent Rpl5p is bound by specific chaperone Syo1p during translation; homologous to mammalian ribosomal protein L5 and bacterial L18; binds 5S rRNA and is required for 60S subunit assembly
YPL131W	S000006052	RPL5	894	16	302891	EVO1_	indel	C	-T	29	7	Clone variant, promoter	Ribosomal 60S subunit protein L5; nascent Rpl5p is bound by specific chaperone Syo1p during translation; homologous to mammalian ribosomal protein L5 and bacterial L18; binds 5S rRNA and is required for 60S subunit assembly
YPL131W	S000006052	RPL5	894	16	302930	EVO4_	snp	C	A	29	7	Clone variant, promoter	Ribosomal 60S subunit protein L5; nascent Rpl5p is bound by specific chaperone Syo1p during translation; homologous to mammalian ribosomal protein L5 and bacterial L18; binds 5S rRNA and is required for 60S subunit assembly
YPL131W	S000006052	RPL5	894	16	302891	EVO6_	indel	C	-T	25	8	Clone variant, promoter	Ribosomal 60S subunit protein L5; nascent Rpl5p is bound by specific chaperone Syo1p during translation; homologous to mammalian ribosomal protein L5 and bacterial L18; binds 5S rRNA and is required for 60S subunit assembly
YOR126C	S000005652	IAH1	717	15	560808	EVO2_	indel	G	+A	47	15	Clone variant, promoter	Isoamyl acetate-hydrolyzing esterase; required in balance with alcohol acetyltransferase to maintain optimal amounts of isoamyl acetate, which is particularly important in sake brewing
YMR067C	S000004671	UBX4	1251	13	406225	EVO3_	snp	G	A	22	18	Clone variant, promoter	UBX domain-containing protein that interacts with Cdc48p; involved in degradation of polyubiquitinated proteins via the ERAD (ER-associated degradation) pathway; modulates the Cdc48p-Nplp-Ufd1p AAA ATPase complex during its role in delivery of misfolded proteins to the proteasome; protein abundance increases in response to DNA replication stress
YOR356W	S000005883	S000005883	1896	15	1006935	EVO1_	snp	G	T	25	12	Clone variant, promoter	Putative ortholog of human ETF-dH; found in a large supramolecular complex with other mitochondrial dehydrogenases; may have a role in oxidative stress response; ETF-dH is also known as electron transfer flavoprotein dehydrogenase
YOR356W	S000005883	S000005883	1896	15	1006945	EVO1_	snp	A	T	22	9	Clone variant, promoter	Putative ortholog of human ETF-dH; found in a large supramolecular complex with other mitochondrial dehydrogenases; may have a role in oxidative stress response; ETF-dH is also known as electron transfer flavoprotein dehydrogenase
YOR356W	S000005883	S000005883	1896	15	1009188	EVO1_	snp	A	T	25	8	Clone variant, other	Putative ortholog of human ETF-dH; found in a large supramolecular complex with other mitochondrial dehydrogenases; may have a role in oxidative stress response; ETF-dH is also known as electron transfer flavoprotein dehydrogenase
YOR356W	S000005883	S000005883	1896	15	1009286	EVO6_	snp	C	G	70	40	Clone variant, other	Putative ortholog of human ETF-dH; found in a large supramolecular complex with other mitochondrial dehydrogenases; may have a role in oxidative stress response; ETF-dH is also known as electron transfer flavoprotein dehydrogenase
YJR111C	S000003872	S000003872	852	10	636962	EVO1_	snp	C	A	27	22	Clone variant, promoter	Peroxisomal matrix protein with naturally active promoter; well-conserved in fungi; localized to peroxisomes under physiological growth conditions; levels of some amino acids are altered upon both knockout and overexpression, suggesting potential involvement of Pxp2p in amino acid metabolism or related cellular metabolic processes (needs further study); GFP-fusion protein displays inherent dual l…
YJR111C	S000003872	S000003872	852	10	636962	EVO3_	snp	C	A	21	29	Clone variant, promoter	Peroxisomal matrix protein with naturally active promoter; well-conserved in fungi; localized to peroxisomes under physiological growth conditions; levels of some amino acids are altered upon both knockout and overexpression, suggesting potential involvement of Pxp2p in amino acid metabolism or related cellular metabolic processes (needs further study); GFP-fusion protein displays inherent dual l…
YJR111C	S000003872	S000003872	852	10	636990	EVO1_	snp	T	A	33	15	Clone variant, promoter	Peroxisomal matrix protein with naturally active promoter; well-conserved in fungi; localized to peroxisomes under physiological growth conditions; levels of some amino acids are altered upon both knockout and overexpression, suggesting potential involvement of Pxp2p in amino acid metabolism or related cellular metabolic processes (needs further study); GFP-fusion protein displays inherent dual l…
YML114C	S000004582	TAF8	1533	13	43880	EVO4_	snp	G	T	36	11	Clone variant, promoter	TFIID subunit (65 kDa); involved in RNA polymerase II transcription initiation
YML114C	S000004582	TAF8	1533	13	43886	EVO2_	snp	G	T	20	10	Clone variant, promoter	TFIID subunit (65 kDa); involved in RNA polymerase II transcription initiation
YML114C	S000004582	TAF8	1533	13	43893	EVO4_	snp	A	T	25	8	Clone variant, promoter	TFIID subunit (65 kDa); involved in RNA polymerase II transcription initiation
YML114C	S000004582	TAF8	1533	13	43895	EVO1_	snp	G	T	33	6	Clone variant, promoter	TFIID subunit (65 kDa); involved in RNA polymerase II transcription initiation
YML114C	S000004582	TAF8	1533	13	43896	EVO4_	snp	C	T	22	9	Clone variant, promoter	TFIID subunit (65 kDa); involved in RNA polymerase II transcription initiation
YML114C	S000004582	TAF8	1533	13	43899	EVO2_	snp	A	T	27	11	Clone variant, promoter	TFIID subunit (65 kDa); involved in RNA polymerase II transcription initiation
YML114C	S000004582	TAF8	1533	13	43899	EVO3_	snp	A	T	29	7	Clone variant, promoter	TFIID subunit (65 kDa); involved in RNA polymerase II transcription initiation
YML114C	S000004582	TAF8	1533	13	43901	EVO4_	snp	G	T	27	11	Clone variant, promoter	TFIID subunit (65 kDa); involved in RNA polymerase II transcription initiation
YML114C	S000004582	TAF8	1533	13	43905	EVO2_	snp	C	T	33	9	Clone variant, promoter	TFIID subunit (65 kDa); involved in RNA polymerase II transcription initiation
YML114C	S000004582	TAF8	1533	13	43907	EVO3_	snp	A	T	67	3	Clone variant, promoter	TFIID subunit (65 kDa); involved in RNA polymerase II transcription initiation
YML114C	S000004582	TAF8	1533	13	43923	EVO3_	snp	G	T	33	12	Clone variant, promoter	TFIID subunit (65 kDa); involved in RNA polymerase II transcription initiation
YML114C	S000004582	TAF8	1533	13	43889	EVO8_	snp	G	A	25	8	Clone variant, promoter	TFIID subunit (65 kDa); involved in RNA polymerase II transcription initiation
YML114C	S000004582	TAF8	1533	13	43921	EVO8_	snp	G	T	25	8	Clone variant, promoter	TFIID subunit (65 kDa); involved in RNA polymerase II transcription initiation
YML114C	S000004582	TAF8	1533	13	43961	EVO7_	snp	A	C	30	10	Clone variant, promoter	TFIID subunit (65 kDa); involved in RNA polymerase II transcription initiation
YML114C	S000004582	TAF8	1533	13	41945	EVO5_	snp	G	A	21	14	Clone variant, other	TFIID subunit (65 kDa); involved in RNA polymerase II transcription initiation
YML114C	S000004582	TAF8	1533	13	41945	EVO6_	snp	G	A	44	9	Clone variant, other	TFIID subunit (65 kDa); involved in RNA polymerase II transcription initiation
YLR143W	S000004133	S000004133	2058	12	426646	EVO2_	snp	G	A	31	16	Clone variant, promoter	Diphthamide synthetase; catalyzes the last amidation step of diphthamide biosynthesis using ammonium and ATP; evolutionarily conserved in eukaryotes; dph6 mutants exhibit diphthine accumulation and resistance to sordarin, which is indicative of defects in diphthamide formation on EF2; green fluorescent protein (GFP)-tagged protein localizes to the cytoplasm; DPH6/YLR143W is not an essential gene
YLR143W	S000004133	S000004133	2058	12	426660	EVO2_	snp	C	A	33	12	Clone variant, promoter	Diphthamide synthetase; catalyzes the last amidation step of diphthamide biosynthesis using ammonium and ATP; evolutionarily conserved in eukaryotes; dph6 mutants exhibit diphthine accumulation and resistance to sordarin, which is indicative of defects in diphthamide formation on EF2; green fluorescent protein (GFP)-tagged protein localizes to the cytoplasm; DPH6/YLR143W is not an essential gene
YLR143W	S000004133	S000004133	2058	12	426661	EVO4_	snp	C	A	22	9	Clone variant, promoter	Diphthamide synthetase; catalyzes the last amidation step of diphthamide biosynthesis using ammonium and ATP; evolutionarily conserved in eukaryotes; dph6 mutants exhibit diphthine accumulation and resistance to sordarin, which is indicative of defects in diphthamide formation on EF2; green fluorescent protein (GFP)-tagged protein localizes to the cytoplasm; DPH6/YLR143W is not an essential gene
YBR106W	S000000310	PHO88	567	2	452434	EVO3_	indel	C	-T	25	12	Clone variant, promoter	Protein involved in SRP-independent targeting of substrates to the ER; component of an alternative ER targeting pathway that has partial functional redundancy with the GET pathway; preference for substrates with downstream transmembrane domains; interacts with Snd1p, Env10p/Snd2p, and Sec61p-translocon subunits; can compensate for loss of SRP; role in phosphate transport, interacting with pho88, …
YKR106W	S000001814	S000001814	1848	11	661359	EVO2_	snp	C	A	33	6	Clone variant, promoter	Proton:glutathione antiporter; localized to the vacuolar and plasma membranes; expressed at a very low level; potential role in resistance to oxidative stress and modulation of the PKA pathway; GEX2 has a paralog, GEX1, that arose from a segmental duplication
YKR106W	S000001814	S000001814	1848	11	661422	EVO7_	snp	C	A	22	9	Clone variant, promoter	Proton:glutathione antiporter; localized to the vacuolar and plasma membranes; expressed at a very low level; potential role in resistance to oxidative stress and modulation of the PKA pathway; GEX2 has a paralog, GEX1, that arose from a segmental duplication
YKL106W	S000001589	AAT1	1356	11	237387	EVO4_	snp	C	A	67	48	Clone variant, promoter	Mitochondrial aspartate aminotransferase; catalyzes the conversion of oxaloacetate to aspartate in aspartate and asparagine biosynthesis
YKL045W	S000001528	PRI2	1587	11	352849	EVO2_	snp	T	G	27	99	Clone variant, promoter	Subunit of DNA primase; DNA primase is required for DNA synthesis and double-strand break repair
YKL045W	S000001528	PRI2	1587	11	352849	EVO4_	snp	T	G	30	83	Clone variant, promoter	Subunit of DNA primase; DNA primase is required for DNA synthesis and double-strand break repair
YKL045W	S000001528	PRI2	1587	11	352849	EVO6_	snp	T	G	25	97	Clone variant, promoter	Subunit of DNA primase; DNA primase is required for DNA synthesis and double-strand break repair
YKL045W	S000001528	PRI2	1587	11	352849	EVO8_	snp	T	G	20	85	Clone variant, promoter	Subunit of DNA primase; DNA primase is required for DNA synthesis and double-strand break repair
YLR162W	S000004152	S000004152	357	12	489464	EVO1_	indel	A	-AT	38	29	Clone variant, promoter	Protein of unknown function; overexpression confers resistance to the antimicrobial peptide MiAMP1 and causes growth arrest, apoptosis, and increased sensitivity to cobalt chloride
YLR162W	S000004152	S000004152	357	12	489470	EVO1_	snp	T	G	35	31	Clone variant, promoter	Protein of unknown function; overexpression confers resistance to the antimicrobial peptide MiAMP1 and causes growth arrest, apoptosis, and increased sensitivity to cobalt chloride
YDR333C	S000002741	S000002741	2172	4	1135678	EVO2_	snp	C	A	21	14	Clone variant, promoter	Component of the ribosome quality control complex (RQC); RQC (Rqc1p-Rkr1p-Tae2p-Cdc48p-Npl4p-Ufd1p) is a ribosome-bound complex required for the degradation of polypeptides arising from stalled translation; required along with Rkr1p for recruitment of the Cdc48p-Npl4p-Ufd1p AAA ATPase complex to the RQC
YDR333C	S000002741	S000002741	2172	4	1135678	EVO4_	snp	C	A	36	14	Clone variant, promoter	Component of the ribosome quality control complex (RQC); RQC (Rqc1p-Rkr1p-Tae2p-Cdc48p-Npl4p-Ufd1p) is a ribosome-bound complex required for the degradation of polypeptides arising from stalled translation; required along with Rkr1p for recruitment of the Cdc48p-Npl4p-Ufd1p AAA ATPase complex to the RQC
YDR333C	S000002741	S000002741	2172	4	1135678	EVO1_	snp	C	A	33	9	Clone variant, promoter	Component of the ribosome quality control complex (RQC); RQC (Rqc1p-Rkr1p-Tae2p-Cdc48p-Npl4p-Ufd1p) is a ribosome-bound complex required for the degradation of polypeptides arising from stalled translation; required along with Rkr1p for recruitment of the Cdc48p-Npl4p-Ufd1p AAA ATPase complex to the RQC
YIL047C	S000001309	SYG1	2709	9	267868	EVO1_	snp	T	G	20	10	Clone variant, promoter	Plasma membrane protein of unknown function; truncation and overexpression suppresses lethality of G-alpha protein deficiency
YIL047C	S000001309	SYG1	2709	9	267886	EVO1_	snp	T	A	25	8	Clone variant, promoter	Plasma membrane protein of unknown function; truncation and overexpression suppresses lethality of G-alpha protein deficiency
YIL047C	S000001309	SYG1	2709	9	267893	EVO6_	snp	C	A	25	8	Clone variant, promoter	Plasma membrane protein of unknown function; truncation and overexpression suppresses lethality of G-alpha protein deficiency
YIL047C	S000001309	SYG1	2709	9	267900	EVO6_	snp	C	A	22	9	Clone variant, promoter	Plasma membrane protein of unknown function; truncation and overexpression suppresses lethality of G-alpha protein deficiency
YGR180C	S000003412	RNR4	1038	7	856370	EVO2_	snp	T	G	25	8	Clone variant, promoter	Ribonucleotide-diphosphate reductase (RNR) small subunit; the RNR complex catalyzes the rate-limiting step in dNTP synthesis and is regulated by DNA replication and DNA damage checkpoint pathways via localization of the small subunits; relocalizes from nucleus to cytoplasm upon DNA replication stress; RNR4 has a paralog, RNR2, that arose from the whole genome duplication
YGR180C	S000003412	RNR4	1038	7	856429	EVO1_	indel	C	-A	33	6	Clone variant, promoter	Ribonucleotide-diphosphate reductase (RNR) small subunit; the RNR complex catalyzes the rate-limiting step in dNTP synthesis and is regulated by DNA replication and DNA damage checkpoint pathways via localization of the small subunits; relocalizes from nucleus to cytoplasm upon DNA replication stress; RNR4 has a paralog, RNR2, that arose from the whole genome duplication
YGR180C	S000003412	RNR4	1038	7	856444	EVO7_	snp	T	A	25	8	Clone variant, promoter	Ribonucleotide-diphosphate reductase (RNR) small subunit; the RNR complex catalyzes the rate-limiting step in dNTP synthesis and is regulated by DNA replication and DNA damage checkpoint pathways via localization of the small subunits; relocalizes from nucleus to cytoplasm upon DNA replication stress; RNR4 has a paralog, RNR2, that arose from the whole genome duplication
YBR291C	S000000495	CTP1	900	2	784712	EVO1_	indel	C	-T	29	7	Clone variant, promoter	Mitochondrial inner membrane citrate transporter; member of the mitochondrial carrier family
YBR291C	S000000495	CTP1	900	2	784709	EVO7_	snp	C	T	22	9	Clone variant, promoter	Mitochondrial inner membrane citrate transporter; member of the mitochondrial carrier family
YGR178C	S000003410	PBP1	2169	7	853508	EVO2_	indel	A	-T	21	14	Clone variant, promoter	Component of glucose deprivation induced stress granules; involved in P-body-dependent granule assembly; similar to human ataxin-2; interacts with Pab1p to regulate mRNA polyadenylation; interacts with Mkt1p to regulate HO translation; protein increases in abundance and relative distribution to the nucleus increases upon DNA replication stress
YGR178C	S000003410	PBP1	2169	7	853508	EVO1_	indel	A	-T	21	14	Clone variant, promoter	Component of glucose deprivation induced stress granules; involved in P-body-dependent granule assembly; similar to human ataxin-2; interacts with Pab1p to regulate mRNA polyadenylation; interacts with Mkt1p to regulate HO translation; protein increases in abundance and relative distribution to the nucleus increases upon DNA replication stress
YGR178C	S000003410	PBP1	2169	7	850799	EVO2_	indel	G	+A	20	10	Clone variant, other	Component of glucose deprivation induced stress granules; involved in P-body-dependent granule assembly; similar to human ataxin-2; interacts with Pab1p to regulate mRNA polyadenylation; interacts with Mkt1p to regulate HO translation; protein increases in abundance and relative distribution to the nucleus increases upon DNA replication stress
YGR178C	S000003410	PBP1	2169	7	850850	EVO2_	snp	C	T	23	13	Clone variant, other	Component of glucose deprivation induced stress granules; involved in P-body-dependent granule assembly; similar to human ataxin-2; interacts with Pab1p to regulate mRNA polyadenylation; interacts with Mkt1p to regulate HO translation; protein increases in abundance and relative distribution to the nucleus increases upon DNA replication stress
YGR178C	S000003410	PBP1	2169	7	850842	EVO7_	snp	C	T	31	16	Clone variant, other	Component of glucose deprivation induced stress granules; involved in P-body-dependent granule assembly; similar to human ataxin-2; interacts with Pab1p to regulate mRNA polyadenylation; interacts with Mkt1p to regulate HO translation; protein increases in abundance and relative distribution to the nucleus increases upon DNA replication stress
YPL246C	S000006167	RBD2	789	16	85375	EVO1_	snp	C	A	21	19	Clone variant, promoter	Possible rhomboid protease; has similarity to eukaryotic rhomboid proteases including Pcp1p
YBR058C-A	S000007521	TSC3	243	2	357010	EVO4_	snp	T	G	29	55	Clone variant, promoter	Protein that stimulates the activity of serine palmitoyltransferase; involved in sphingolipid biosynthesis; Lcb1p and Lcb2p are the two components of serine palmitoyltransferase
YGL155W	S000003123	CDC43	1131	7	213858	EVO1_	indel	G	+T	22	18	Clone variant, promoter	Beta subunit of geranylgeranyltransferase type I; subunit of the Ram2p-Cdc43p heterodimer that catalyzes the geranylgeranylation of the cysteine residue in proteins containing a C-terminal CaaX sequence ending in Leu or Phe; has substrates important for morphogenesis
YGL155W	S000003123	CDC43	1131	7	213858	EVO8_	indel	G	+T	20	15	Clone variant, promoter	Beta subunit of geranylgeranyltransferase type I; subunit of the Ram2p-Cdc43p heterodimer that catalyzes the geranylgeranylation of the cysteine residue in proteins containing a C-terminal CaaX sequence ending in Leu or Phe; has substrates important for morphogenesis
YGL155W	S000003123	CDC43	1131	7	213901	EVO6_	snp	G	T	20	20	Clone variant, promoter	Beta subunit of geranylgeranyltransferase type I; subunit of the Ram2p-Cdc43p heterodimer that catalyzes the geranylgeranylation of the cysteine residue in proteins containing a C-terminal CaaX sequence ending in Leu or Phe; has substrates important for morphogenesis
YJR047C	S000003808	ANB1	474	10	525606	EVO4_	snp	C	A	25	20	Clone variant, promoter	Translation elongation factor eIF-5A; previously thought to function in translation initiation; undergoes an essential hypusination modification; expressed under anaerobic conditions; ANB1 has a paralog, HYP2, that arose from the whole genome duplication; human EIF5A complements the inviability of the yeast hyp2 anb1 double null mutant
YJR047C	S000003808	ANB1	474	10	525627	EVO2_	snp	C	A	26	19	Clone variant, promoter	Translation elongation factor eIF-5A; previously thought to function in translation initiation; undergoes an essential hypusination modification; expressed under anaerobic conditions; ANB1 has a paralog, HYP2, that arose from the whole genome duplication; human EIF5A complements the inviability of the yeast hyp2 anb1 double null mutant
YJR047C	S000003808	ANB1	474	10	525666	EVO2_	snp	C	A	25	8	Clone variant, promoter	Translation elongation factor eIF-5A; previously thought to function in translation initiation; undergoes an essential hypusination modification; expressed under anaerobic conditions; ANB1 has a paralog, HYP2, that arose from the whole genome duplication; human EIF5A complements the inviability of the yeast hyp2 anb1 double null mutant
YJR047C	S000003808	ANB1	474	10	525627	EVO6_	snp	C	A	22	9	Clone variant, promoter	Translation elongation factor eIF-5A; previously thought to function in translation initiation; undergoes an essential hypusination modification; expressed under anaerobic conditions; ANB1 has a paralog, HYP2, that arose from the whole genome duplication; human EIF5A complements the inviability of the yeast hyp2 anb1 double null mutant
YPR158W	S000006362	CUR1	759	16	843127	EVO1_	indel	C	-T	23	13	Clone variant, promoter	Sorting factor, central regulator of spatial protein quality control; physically and functionally interacts with chaperones to promote sorting and deposition of misfolded proteins into cytosolic compartments; involved in destabilization of [URE3] prions; CUR1 has a paralog, BTN2, that arose from the whole genome duplication
YPR158W	S000006362	CUR1	759	16	843114	EVO5_	snp	T	A	21	14	Clone variant, promoter	Sorting factor, central regulator of spatial protein quality control; physically and functionally interacts with chaperones to promote sorting and deposition of misfolded proteins into cytosolic compartments; involved in destabilization of [URE3] prions; CUR1 has a paralog, BTN2, that arose from the whole genome duplication
YOR191W	S000005717	ULS1	4860	15	691849	EVO1_	snp	A	G	26	54	Clone variant, promoter	Swi2/Snf2-related translocase, SUMO-Targeted Ubiquitin Ligase (STUbL); required for maintenance of NHEJ inhibition at telomeres; functions at telomeres to translocate and ubiquitinylate poly-sumoylated Rap1p for proteosomal degradation; plays role in antagonizing silencing during mating-type switching; only known STUbL with a translocase activity; contains RING finger domain; relocalizes from nuc…
YDR072C	S000002479	IPT1	1584	4	591770	EVO2_	snp	G	A	20	10	Clone variant, promoter	Inositolphosphotransferase; involved in synthesis of mannose-(inositol-P)2-ceramide (M(IP)2C), the most abundant sphingolipid; can mutate to resistance to the antifungals syringomycin E and DmAMP1 and to K. lactis zymocin
YDR072C	S000002479	IPT1	1584	4	589644	EVO3_	snp	T	A	25	8	Clone variant, other	Inositolphosphotransferase; involved in synthesis of mannose-(inositol-P)2-ceramide (M(IP)2C), the most abundant sphingolipid; can mutate to resistance to the antifungals syringomycin E and DmAMP1 and to K. lactis zymocin
YDR072C	S000002479	IPT1	1584	4	589650	EVO1_	indel	T	-A	20	10	Clone variant, other	Inositolphosphotransferase; involved in synthesis of mannose-(inositol-P)2-ceramide (M(IP)2C), the most abundant sphingolipid; can mutate to resistance to the antifungals syringomycin E and DmAMP1 and to K. lactis zymocin
YBL027W	S000000123	RPL19B	954	2	167975	EVO1_	snp	T	A	20	10	Clone variant, promoter	Ribosomal 60S subunit protein L19B; rpl19a and rpl19b single null mutations result in slow growth, while the double null mutation is lethal; homologous to mammalian ribosomal protein L19, no bacterial homolog; RPL19B has a paralog, RPL19A, that arose from the whole genome duplication
YLR026C	S000004016	SED5	1023	12	196590	EVO2_	indel	A	-T	68	31	Clone variant, promoter	cis-Golgi t-SNARE syntaxin; required for vesicular transport between the ER and the Golgi complex; binds at least 9 SNARE proteins
YLR026C	S000004016	SED5	1023	12	196776	EVO3_	snp	A	C	29	7	Clone variant, promoter	cis-Golgi t-SNARE syntaxin; required for vesicular transport between the ER and the Golgi complex; binds at least 9 SNARE proteins
YOL053W	S000005414	AIM39	1188	15	230043	EVO2_	snp	G	T	23	13	Clone variant, promoter	Protein of unknown function; null mutant displays elevated frequency of mitochondrial genome loss
YOL053W	S000005414	AIM39	1188	15	230037	EVO5_	snp	G	A	22	9	Clone variant, promoter	Protein of unknown function; null mutant displays elevated frequency of mitochondrial genome loss
YPR162C	S000006366	ORC4	1590	16	868370	EVO1_	indel	A	-T	60	5	Clone variant, promoter	Subunit of the origin recognition complex (ORC); ORC directs DNA replication by binding to replication origins and is also involved in transcriptional silencing; ORC4 has a paralog, RIF2, that arose from the whole genome duplication
YPR162C	S000006366	ORC4	1590	16	868397	EVO8_	snp	G	T	20	10	Clone variant, promoter	Subunit of the origin recognition complex (ORC); ORC directs DNA replication by binding to replication origins and is also involved in transcriptional silencing; ORC4 has a paralog, RIF2, that arose from the whole genome duplication
YML074C	S000004539	FPR3	1236	13	121610	EVO2_	snp	G	A	100	75	Clone variant, promoter	Nucleolar peptidyl-prolyl cis-trans isomerase (PPIase); FK506 binding protein; affects expression of multiple genes via its role in nucleosome assembly; phosphorylated by casein kinase II (Cka1p-Cka2p-Ckb1p-Ckb2p) and dephosphorylated by Ptp1p; PPIase domain acts as a transcriptional repressor when tethered to DNA by lexA, and repressor activity is dependent on PPIase activity; FPR3 has a paralog…
YJL109C	S000003645	UTP10	5310	10	217453	EVO4_	snp	G	A	25	12	Clone variant, promoter	Nucleolar protein; component of the small subunit (SSU) processome containing the U3 snoRNA that is involved in processing of pre-18S rRNA; mutant has increased aneuploidy tolerance
YER056C	S000000858	FCY2	1602	5	268311	EVO4_	snp	T	A	50	4	Clone variant, promoter	Purine-cytosine permease; mediates purine (adenine, guanine, and hypoxanthine) and cytosine accumulation; relative distribution to the vacuole increases upon DNA replication stress
YER056C	S000000858	FCY2	1602	5	268354	EVO5_	snp	C	A	25	8	Clone variant, promoter	Purine-cytosine permease; mediates purine (adenine, guanine, and hypoxanthine) and cytosine accumulation; relative distribution to the vacuole increases upon DNA replication stress
YNL062C	S000005006	GCD10	1437	14	510371	EVO1_	snp	G	T	24	17	Clone variant, promoter	Subunit of tRNA (1-methyladenosine) methyltransferase with Gcd14p; required for the modification of the adenine at position 58 in tRNAs, especially tRNAi-Met; first identified as a negative regulator of GCN4 expression
YNL062C	S000005006	GCD10	1437	14	510379	EVO1_	snp	G	T	22	23	Clone variant, promoter	Subunit of tRNA (1-methyladenosine) methyltransferase with Gcd14p; required for the modification of the adenine at position 58 in tRNAs, especially tRNAi-Met; first identified as a negative regulator of GCN4 expression
YPL137C	S000006058	GIP3	3831	16	296859	EVO1_	snp	C	T	22	9	Clone variant, promoter	Cytoplasmic protein that regulates protein phosphatase 1 Glc7p; overexpression relocalizes Glc7p from the nucleus and prevents chromosome segregation; may interact with ribosomes, based on co-purification experiments; GIP3 has a paralog, HER1, that arose from the whole genome duplication
YBR085W	S000000289	AAC3	924	2	415791	EVO4_	snp	G	T	22	9	Clone variant, promoter	Mitochondrial inner membrane ADP/ATP translocator; exchanges cytosolic ADP for mitochondrially synthesized ATP; expressed under anaerobic conditions; similar to Aac1p; has roles in maintenance of viability and in respiration; AAC3 has a paralog, PET9, that arose from the whole genome duplication
YML035C	S000004498	AMD1	2433	13	209092	EVO4_	snp	C	T	25	8	Clone variant, promoter	AMP deaminase; tetrameric enzyme that catalyzes the deamination of AMP to form IMP and ammonia; thought to be involved in regulation of intracellular purine (adenine, guanine, and inosine) nucleotide pools
YML035C	S000004498	AMD1	2433	13	209094	EVO8_	snp	A	T	20	10	Clone variant, promoter	AMP deaminase; tetrameric enzyme that catalyzes the deamination of AMP to form IMP and ammonia; thought to be involved in regulation of intracellular purine (adenine, guanine, and inosine) nucleotide pools
YIL044C	S000001306	AGE2	897	9	274033	EVO2_	snp	A	C	27	22	Clone variant, promoter	ADP-ribosylation factor (ARF) GTPase activating protein (GAP) effector; involved in Trans-Golgi-Network (TGN) transport; contains C2C2H2 cysteine/histidine motif
YIL044C	S000001306	AGE2	897	9	274033	EVO1_	snp	A	C	50	6	Clone variant, promoter	ADP-ribosylation factor (ARF) GTPase activating protein (GAP) effector; involved in Trans-Golgi-Network (TGN) transport; contains C2C2H2 cysteine/histidine motif
YIL044C	S000001306	AGE2	897	9	274033	EVO3_	snp	A	C	33	15	Clone variant, promoter	ADP-ribosylation factor (ARF) GTPase activating protein (GAP) effector; involved in Trans-Golgi-Network (TGN) transport; contains C2C2H2 cysteine/histidine motif
YLR249W	S000004239	YEF3	3135	12	636567	EVO1_	snp	C	T	33	9	Clone variant, promoter	Translation elongation factor 3; contains two ABC cassettes; binds and hydrolyzes ATP; YEF3 has a paralog, HEF3, that arose from the whole genome duplication
YLR249W	S000004239	YEF3	3135	12	636573	EVO1_	snp	C	T	43	7	Clone variant, promoter	Translation elongation factor 3; contains two ABC cassettes; binds and hydrolyzes ATP; YEF3 has a paralog, HEF3, that arose from the whole genome duplication
YDR295C	S000002703	HDA2	2025	4	1054867	EVO2_	snp	G	T	22	9	Clone variant, promoter	Subunit of the HDA1 histone deacetylase complex; possibly tetrameric trichostatin A-sensitive class II histone deacetylase complex contains Hda1p homodimer and an Hda2p-Hda3p heterodimer; involved in telomere maintenance; relocalizes to the cytosol in response to hypoxia
YOR089C	S000005615	VPS21	633	15	490998	EVO1_	snp	C	A	23	13	Clone variant, promoter	Endosomal Rab family GTPase; required for endocytic transport and sorting of vacuolar hydrolases; required for endosomal localization of the CORVET complex; required with YPT52 for MVB biogenesis and sorting; involved in autophagy and ionic stress tolerance; geranylgeranylation required for membrane association; protein abundance increases in response to DNA replication stress; mammalian Rab5 hom…
YOR089C	S000005615	VPS21	633	15	490998	EVO8_	snp	C	A	23	13	Clone variant, promoter	Endosomal Rab family GTPase; required for endocytic transport and sorting of vacuolar hydrolases; required for endosomal localization of the CORVET complex; required with YPT52 for MVB biogenesis and sorting; involved in autophagy and ionic stress tolerance; geranylgeranylation required for membrane association; protein abundance increases in response to DNA replication stress; mammalian Rab5 hom…
YOR089C	S000005615	VPS21	633	15	491006	EVO5_	snp	G	A	27	11	Clone variant, promoter	Endosomal Rab family GTPase; required for endocytic transport and sorting of vacuolar hydrolases; required for endosomal localization of the CORVET complex; required with YPT52 for MVB biogenesis and sorting; involved in autophagy and ionic stress tolerance; geranylgeranylation required for membrane association; protein abundance increases in response to DNA replication stress; mammalian Rab5 hom…
YOR089C	S000005615	VPS21	633	15	491006	EVO6_	snp	G	A	47	15	Clone variant, promoter	Endosomal Rab family GTPase; required for endocytic transport and sorting of vacuolar hydrolases; required for endosomal localization of the CORVET complex; required with YPT52 for MVB biogenesis and sorting; involved in autophagy and ionic stress tolerance; geranylgeranylation required for membrane association; protein abundance increases in response to DNA replication stress; mammalian Rab5 hom…
YOR089C	S000005615	VPS21	633	15	491006	EVO8_	snp	G	A	33	15	Clone variant, promoter	Endosomal Rab family GTPase; required for endocytic transport and sorting of vacuolar hydrolases; required for endosomal localization of the CORVET complex; required with YPT52 for MVB biogenesis and sorting; involved in autophagy and ionic stress tolerance; geranylgeranylation required for membrane association; protein abundance increases in response to DNA replication stress; mammalian Rab5 hom…
YHR070W	S000001112	TRM5	1500	8	234748	EVO4_	snp	C	T	20	15	Clone variant, promoter	tRNA(m(1)G37)methyltransferase; methylates a tRNA base adjacent to the anticodon that has a role in prevention of frameshifting; localized to both cytoplasm and mitochondria, and modifies both cytoplasmic and mitochondrial tRNAs; mutations in human ortholog TRMT5 are associated with skeletal muscle respiratory chain deficiencies, and trm5 mutations analogous to disease mutations decrease respirat…
YNL065W	S000005009	AQR1	1761	14	503037	EVO2_	snp	C	T	20	10	Clone variant, promoter	Plasma membrane transporter of the major facilitator superfamily; member of the 12-spanner drug:H(+) antiporter DHA1 family; confers resistance to short-chain monocarboxylic acids and quinidine; involved in the excretion of excess amino acids; AQR1 has a paralog, QDR1, that arose from the whole genome duplication; relocalizes from plasma membrane to cytoplasm upon DNA replication stress
YNL065W	S000005009	AQR1	1761	14	503030	EVO5_	snp	A	T	33	6	Clone variant, promoter	Plasma membrane transporter of the major facilitator superfamily; member of the 12-spanner drug:H(+) antiporter DHA1 family; confers resistance to short-chain monocarboxylic acids and quinidine; involved in the excretion of excess amino acids; AQR1 has a paralog, QDR1, that arose from the whole genome duplication; relocalizes from plasma membrane to cytoplasm upon DNA replication stress
YML016C	S000004478	PPZ1	2079	13	241853	EVO1_	indel	C	+T	25	8	Clone variant, promoter	Serine/threonine protein phosphatase Z, isoform of Ppz2p; involved in regulation of potassium transport, which affects osmotic stability, cell cycle progression, and halotolerance
YML016C	S000004478	PPZ1	2079	13	241898	EVO1_	snp	G	T	25	8	Clone variant, promoter	Serine/threonine protein phosphatase Z, isoform of Ppz2p; involved in regulation of potassium transport, which affects osmotic stability, cell cycle progression, and halotolerance
YPL221W	S000006142	FLC1	2382	16	132445	EVO2_	snp	T	G	25	8	Clone variant, promoter	Flavin adenine dinucleotide transporter; required for uptake of FAD into endoplasmic reticulum; involved in cell wall maintenance; FLC1 has a paralog, FLC3, that arose from the whole genome duplication
YPL221W	S000006142	FLC1	2382	16	132449	EVO1_	snp	G	A	27	11	Clone variant, promoter	Flavin adenine dinucleotide transporter; required for uptake of FAD into endoplasmic reticulum; involved in cell wall maintenance; FLC1 has a paralog, FLC3, that arose from the whole genome duplication
YPL221W	S000006142	FLC1	2382	16	132449	EVO3_	snp	G	A	50	6	Clone variant, promoter	Flavin adenine dinucleotide transporter; required for uptake of FAD into endoplasmic reticulum; involved in cell wall maintenance; FLC1 has a paralog, FLC3, that arose from the whole genome duplication
YPL221W	S000006142	FLC1	2382	16	132451	EVO1_	snp	T	A	29	7	Clone variant, promoter	Flavin adenine dinucleotide transporter; required for uptake of FAD into endoplasmic reticulum; involved in cell wall maintenance; FLC1 has a paralog, FLC3, that arose from the whole genome duplication
YPL221W	S000006142	FLC1	2382	16	132454	EVO1_	snp	T	A	25	8	Clone variant, promoter	Flavin adenine dinucleotide transporter; required for uptake of FAD into endoplasmic reticulum; involved in cell wall maintenance; FLC1 has a paralog, FLC3, that arose from the whole genome duplication
YOL158C	S000005518	ENB1	1821	15	21726	EVO2_	indel	G	+A	21	14	Clone variant, promoter	Ferric enterobactin transmembrane transporter; expressed under conditions of iron deprivation; member of the major facilitator superfamily; expression is regulated by Rcs1p and affected by chloroquine treatment
YOL158C	S000005518	ENB1	1821	15	21726	EVO4_	snp	G	A	25	8	Clone variant, promoter	Ferric enterobactin transmembrane transporter; expressed under conditions of iron deprivation; member of the major facilitator superfamily; expression is regulated by Rcs1p and affected by chloroquine treatment
YMR319C	S000004938	FET4	1659	13	914810	EVO2_	indel	T	+TTTTTTTTTTTTTCGG	38	8	Clone variant, promoter	Low-affinity Fe(II) transporter of the plasma membrane
YMR319C	S000004938	FET4	1659	13	914810	EVO1_	indel	T	+TTTTTTTTTTTTTCGG	50	8	Clone variant, promoter	Low-affinity Fe(II) transporter of the plasma membrane
YMR319C	S000004938	FET4	1659	13	914812	EVO2_	indel	T	-A	25	8	Clone variant, promoter	Low-affinity Fe(II) transporter of the plasma membrane
YDR216W	S000002624	ADR1	3972	4	894986	EVO2_	snp	G	T	22	9	Clone variant, promoter	Carbon source-responsive zinc-finger transcription factor; required for transcription of the glucose-repressed gene ADH2, of peroxisomal protein genes, and of genes required for ethanol, glycerol, and fatty acid utilization
YDR216W	S000002624	ADR1	3972	4	894986	EVO1_	snp	G	T	25	8	Clone variant, promoter	Carbon source-responsive zinc-finger transcription factor; required for transcription of the glucose-repressed gene ADH2, of peroxisomal protein genes, and of genes required for ethanol, glycerol, and fatty acid utilization
YHR143W-A	S000001185	RPC10	213	8	387114	EVO4_	snp	C	T	23	13	Clone variant, promoter	RNA polymerase subunit ABC10-alpha, found in RNA pol I, II, and III; relocalizes from nucleolus to cytoplasm upon DNA replication stress
YHR143W-A	S000001185	RPC10	213	8	387127	EVO1_	snp	A	C	25	8	Clone variant, promoter	RNA polymerase subunit ABC10-alpha, found in RNA pol I, II, and III; relocalizes from nucleolus to cytoplasm upon DNA replication stress
YHR143W-A	S000001185	RPC10	213	8	387132	EVO1_	snp	A	C	20	10	Clone variant, promoter	RNA polymerase subunit ABC10-alpha, found in RNA pol I, II, and III; relocalizes from nucleolus to cytoplasm upon DNA replication stress
YHR143W-A	S000001185	RPC10	213	8	387154	EVO4_	snp	G	T	25	12	Clone variant, promoter	RNA polymerase subunit ABC10-alpha, found in RNA pol I, II, and III; relocalizes from nucleolus to cytoplasm upon DNA replication stress
YJL190C	S000003726	RPS22A	393	10	75517	EVO3_	snp	G	C	100	44	Clone variant, promoter	Protein component of the small (40S) ribosomal subunit; homologous to mammalian ribosomal protein S15A and bacterial S8; RPS22A has a paralog, RPS22B, that arose from the whole genome duplication
YDL015C	S000002173	TSC13	933	4	427104	EVO3_	indel	C	-T	20	10	Clone variant, promoter	Enoyl reductase; catalyzes last step in each cycle of very long chain fatty acid elongation; localizes to ER, highly enriched in a structure marking nuclear-vacuolar junctions; coimmunoprecipitates with elongases Elo2p and Elo3p; protein increases in abundance and relative distribution to ER foci increases upon DNA replication stress; human homolog TECR implicated in nonsyndromic mental retardati…
YDL015C	S000002173	TSC13	933	4	427139	EVO7_	snp	A	T	25	8	Clone variant, promoter	Enoyl reductase; catalyzes last step in each cycle of very long chain fatty acid elongation; localizes to ER, highly enriched in a structure marking nuclear-vacuolar junctions; coimmunoprecipitates with elongases Elo2p and Elo3p; protein increases in abundance and relative distribution to ER foci increases upon DNA replication stress; human homolog TECR implicated in nonsyndromic mental retardati…
YDL015C	S000002173	TSC13	933	4	427154	EVO6_	snp	G	T	22	9	Clone variant, promoter	Enoyl reductase; catalyzes last step in each cycle of very long chain fatty acid elongation; localizes to ER, highly enriched in a structure marking nuclear-vacuolar junctions; coimmunoprecipitates with elongases Elo2p and Elo3p; protein increases in abundance and relative distribution to ER foci increases upon DNA replication stress; human homolog TECR implicated in nonsyndromic mental retardati…
YMR075W	S000004680	RCO1	2055	13	413802	EVO2_	snp	T	G	33	61	Clone variant, promoter	Essential component of the Rpd3S histone deacetylase complex; interacts with Eaf3p
YMR075W	S000004680	RCO1	2055	13	413802	EVO4_	snp	T	G	22	69	Clone variant, promoter	Essential component of the Rpd3S histone deacetylase complex; interacts with Eaf3p
YMR075W	S000004680	RCO1	2055	13	413802	EVO1_	snp	T	G	23	75	Clone variant, promoter	Essential component of the Rpd3S histone deacetylase complex; interacts with Eaf3p
YMR075W	S000004680	RCO1	2055	13	413802	EVO3_	snp	T	G	30	71	Clone variant, promoter	Essential component of the Rpd3S histone deacetylase complex; interacts with Eaf3p
[truncated: 1,249 more rows]

## Sheet: WT populations
systematic name	sgdid	gene	size	chromosome	position	population	type	reference nt	clone nt	fraction	reads	mutation effect	description
[truncated: 903 more rows]

## Sheet: legend
column	description
[truncated: 14 more rows]
